# Supplementary material for: Sex Differences in the Ventral Tegmental Area and Nucleus Accumbens Proteome at Baseline and Following Nicotine Exposure
Source: Front Mol Neurosci. 2021 Jul 14;14:657064. doi: 10.3389/fnmol.2021.657064 (PMC8317211; doi:10.3389/fnmol.2021.657064)
Supplement: Supplementary file 5 [file Table_5.xlsx]

## Sheet: VTA chronic pairwise
		The results of pairwise comparisons to determine which proteins were differentially expressed between MC vs. FC, FN vs. FC, and MN vs. MC in the VTA after chronic nicotine administration.
Student's T-test Significant MC_FC	Student's T-test Significant FN_FC	Student's T-test Significant MN_MC	Student's T-test significant	Protein	Uniprot name	Uniprot full protein name	Gene name	q-value MC/FC	Log2(fold change) MC/FC	q-value FN/FC	Log2(fold change) FN/FC	q-value MN/MC	Log2(fold change) MN/MC
	+		FN_FC	Q61838	PZP_MOUSE	Pregnancy zone protein (Alpha-2-macroglobulin) (Alpha-2-M) [Cleaved into: Alpha-2-macroglobulin 165 kDa subunit; Alpha-2-macroglobulin 35 kDa subunit]	A2m	0.0765187	-0.102529	2.78294e-06	-0.471506	0.0364355	-0.128914
				Q3UHJ0	AAK1_MOUSE	AP2-associated protein kinase 1 (EC 2.7.11.1) (Adaptor-associated kinase 1)	Aak1	0.377222	0.0279846	0.545617	-0.00566244	0.652258	-0.0100665
				Q8R0P4	AAMDC_MOUSE	Mth938 domain-containing protein (LI2)	Aamdc	0.211877	0.0640891	0.603091	-0.0390203	0.707946	-0.0318506
				Q8BGQ7	SYAC_MOUSE	Alanine--tRNA ligase, cytoplasmic (EC 6.1.1.7) (Alanyl-tRNA synthetase) (AlaRS) (Protein sticky) (Sti)	Aars	0.0495271	0.112058	0.0221496	-0.0332003	0.0451484	-0.0555816
				Q3THG9	AASD1_MOUSE	Alanyl-tRNA editing protein Aarsd1 (Alanyl-tRNA deacylase alaX) (AlaX) (AlaXp-II) (Alanyl-tRNA synthetase domain-containing protein 1)	Aarsd1	0.439966	0.0288	0.423304	-0.0753136	0.846262	-0.0108495
				Q80YE4	LMTK1_MOUSE	Serine/threonine-protein kinase LMTK1 (EC 2.7.11.1) (Apoptosis-associated tyrosine kinase) (AATYK) (Brain apoptosis-associated tyrosine kinase) (Lemur tyrosine kinase 1)	Aatk	0.124575	-0.109455	0.826108	0.0480275	0.682914	-0.0654547
				P61922	GABT_MOUSE	4-aminobutyrate aminotransferase, mitochondrial (EC 2.6.1.19) ((S)-3-amino-2-methylpropionate transaminase) (EC 2.6.1.22) (GABA aminotransferase) (GABA-AT) (Gamma-amino-N-butyrate transaminase) (GABA transaminase) (GABA-T) (L-AIBAT)	Abat	0.20629	0.0464354	0.0647813	-0.0349212	0.00973012	-0.0368328
				P41234	ABCA2_MOUSE	ATP-binding cassette sub-family A member 2 (ATP-binding cassette transporter 2) (ATP-binding cassette 2)	Abca2	0.0463077	0.1675	0.18705	-0.122249	0.644702	-0.0437934
				Q9JI39	ABCBA_MOUSE	ATP-binding cassette sub-family B member 10, mitochondrial (ABC-mitochondrial erythroid protein) (ABC-me protein) (ATP-binding cassette transporter 10) (ABC transporter 10 protein)	Abcb10	0.0397566	-0.184682	0.614195	-0.221657	0.63497	-0.392605
				P21447	MDR1A_MOUSE	ATP-dependent translocase ABCB1 (ATP-binding cassette sub-family B member 1A) (MDR1A) (Multidrug resistance protein 1A) (EC 7.6.2.2) (Multidrug resistance protein 3) (P-glycoprotein 3) (Phospholipid transporter ABCB1) (EC 7.6.2.1)	Abcb1a	0.237056	0.05885	0.172966	-0.149198	0.152313	-0.0687087
				Q61102	ABCB7_MOUSE	ATP-binding cassette sub-family B member 7, mitochondrial (ATP-binding cassette transporter 7) (ABC transporter 7 protein)	Abcb7	0.234403	0.060962	0.948845	0.00742412	0.553871	0.0392475
+			MC_FC	Q9CXJ4	MITOS_MOUSE	Mitochondrial potassium channel ATP-binding subunit (ATP-binding cassette sub-family B member 8, mitochondrial) (ABCB8) (Mitochondrial sulfonylurea-receptor) (MITOSUR)	Abcb8	0.00778182	0.312577	0.249982	-0.0859027	0.00577738	-0.32451
+			MC_FC	Q9JJ59	ABCB9_MOUSE	ATP-binding cassette sub-family B member 9 (ATP-binding cassette transporter 9) (ABC transporter 9 protein) (mABCB9) (TAP-like protein) (TAPL)	Abcb9	0.00196491	0.525373	0.00055054	-0.247787	0.0101925	-0.259905
				P55096	ABCD3_MOUSE	ATP-binding cassette sub-family D member 3 (68 kDa peroxisomal membrane protein) (PMP68) (70 kDa peroxisomal membrane protein) (PMP70)	Abcd3	0.060593	0.121809	0.5647	0.0511644	0.952139	0.0031333
				P61222	ABCE1_MOUSE	ATP-binding cassette sub-family E member 1 (RNase L inhibitor) (Ribonuclease 4 inhibitor) (RNS4I)	Abce1	0.459291	0.0256631	0.933387	-0.00319266	0.920274	-0.00643492
				Q6P542	ABCF1_MOUSE	ATP-binding cassette sub-family F member 1	Abcf1	0.61388	-0.0207679	0.922233	-0.0148885	0.875137	-0.0178211
				Q99LE6	ABCF2_MOUSE	ATP-binding cassette sub-family F member 2	Abcf2	0.187709	0.0723085	0.548939	-0.0530818	0.652258	-0.05533
				Q6PE15	ABHDA_MOUSE	Palmitoyl-protein thioesterase ABHD10, mitochondrial (EC 3.1.2.22) (Acyl-protein thioesterase ABHD10) (Alpha/beta hydrolase domain-containing protein 10) (Abhydrolase domain-containing protein 10) (Mycophenolic acid acyl-glucuronide esterase, mitochondrial) (EC 3.1.1.93)	Abhd10	0.0303228	0.187788	0.79359	-0.0199313	0.437917	-0.0794332
				Q99LR1	ABD12_MOUSE	Lysophosphatidylserine lipase ABHD12 (EC 3.1.1.-) (2-arachidonoylglycerol hydrolase ABHD12) (Abhydrolase domain-containing protein 12) (Monoacylglycerol lipase ABHD12) (EC 3.1.1.23) (Oxidized phosphatidylserine lipase ABHD12) (EC 3.1.-.-)	Abhd12	0.0312237	0.148187	0.034113	-0.069792	0.100933	-0.0660677
				Q8VCR7	ABHEB_MOUSE	Protein ABHD14B (EC 3.-.-.-) (Alpha/beta hydrolase domain-containing protein 14B) (Abhydrolase domain-containing protein 14B) (CCG1-interacting factor B)	Abhd14b	0.485674	0.0245621	0.355445	0.0598152	0.574413	0.0349348
				Q9Z1Q2	ABHGA_MOUSE	Phosphatidylserine lipase ABHD16A (EC 3.1.-.-) (Alpha/beta hydrolase domain-containing protein 16A) (Abhydrolase domain-containing protein 16A) (HLA-B-associated transcript 5) (mBAT5) (Monoacylglycerol lipase ABHD16A) (EC 3.1.1.23)	Abhd16a	0.915444	0.0045886	0.912398	-0.0121212	0.855519	-0.027585
				Q91ZH7	ABHD3_MOUSE	Phospholipase ABHD3 (EC 3.1.1.32) (EC 3.1.1.4) (Abhydrolase domain-containing protein 3) (Lung alpha/beta hydrolase 3) (MmLABH3)	Abhd3	0.0524359	0.268214	0.426997	-0.198248	0.0722198	-0.614951
				Q8VD66	ABHD4_MOUSE	(Lyso)-N-acylphosphatidylethanolamine lipase (EC 3.1.1.-) (Alpha/beta hydrolase domain-containing protein 4) (Abhydrolase domain-containing protein 4) (Alpha/beta-hydrolase 4)	Abhd4	0.0464959	0.15025	0.973974	-0.00403595	0.176097	-0.112623
				Q8CBW3	ABI1_MOUSE	Abl interactor 1 (Abelson interactor 1) (Abi-1) (Ablphilin-1) (Eps8 SH3 domain-binding protein) (Eps8-binding protein) (Spectrin SH3 domain-binding protein 1) (e3B1)	Abi1	0.0635701	-0.123308	0.0147759	0.128701	0.0470979	0.14142
+			MC_FC	P62484	ABI2_MOUSE	Abl interactor 2 (Abelson interactor 2) (Abi-2) (Abl-binding protein 3) (AblBP3) (Arg-binding protein 1) (ArgBP1)	Abi2	0.01037	-0.24701	0.143505	0.112509	0.0240478	0.19671
				Q4JIM5	ABL2_MOUSE	Tyrosine-protein kinase ABL2 (EC 2.7.10.2) (Abelson murine leukemia viral oncogene homolog 2) (Abelson tyrosine-protein kinase 2) (Abelson-related gene protein) (Tyrosine-protein kinase ARG)	Abl2	0.160961	0.17046	0.799252	-0.0802898	0.856949	-0.102349
				Q8K4G5	ABLM1_MOUSE	Actin-binding LIM protein 1 (abLIM-1) (Actin-binding LIM protein family member 1)	Ablim1	0.780171	-0.0140309	0.473417	-0.114273	0.42114	-0.108942
				Q8BL65	ABLM2_MOUSE	Actin-binding LIM protein 2 (abLIM-2) (Actin-binding LIM protein family member 2)	Ablim2	0.511551	-0.0213339	0.369297	0.0384972	0.486051	-0.0240257
				Q5SSL4	ABR_MOUSE	Active breakpoint cluster region-related protein	Abr	0.0147673	-0.179659	0.00542371	0.0904055	0.00155198	0.0947413
	+		FN_FC	Q4KML4	ABRAL_MOUSE	Costars family protein ABRACL (ABRA C-terminal-like protein)	Abracl	0.0205466	-0.2479	0.015659	-0.442034	0.249873	-0.21309
				Q921H8	THIKA_MOUSE	3-ketoacyl-CoA thiolase A, peroxisomal (EC 2.3.1.16) (Acetyl-CoA acyltransferase A) (Beta-ketothiolase A) (Peroxisomal 3-oxoacyl-CoA thiolase A)	Acaa1a	0.147462	0.0613008	0.111337	0.061137	0.996851	0.000228405
				Q8BWT1	THIM_MOUSE	3-ketoacyl-CoA thiolase, mitochondrial (EC 2.3.1.16) (Acetyl-CoA acetyltransferase) (EC 2.3.1.9) (Acetyl-CoA acyltransferase) (Acyl-CoA hydrolase, mitochondrial) (EC 3.1.2.-) (EC 3.1.2.1) (EC 3.1.2.2) (Beta-ketothiolase) (Mitochondrial 3-oxoacyl-CoA thiolase)	Acaa2	0.119504	0.0698256	0.829908	-0.00822496	0.0104244	-0.0323038
				Q5SWU9	ACACA_MOUSE	Acetyl-CoA carboxylase 1 (ACC1) (EC 6.4.1.2) (ACC-alpha) (Acetyl-CoA carboxylase 265)	Acaca	0.169576	0.0533245	0.0328499	0.0380433	0.322348	-0.0314531
				Q80XL6	ACD11_MOUSE	Acyl-CoA dehydrogenase family member 11 (ACAD-11) (EC 1.3.8.-)	Acad11	0.0108029	0.229589	0.912398	-0.0086906	0.0159439	-0.138298
				Q9D7B6	ACAD8_MOUSE	Isobutyryl-CoA dehydrogenase, mitochondrial (EC 1.3.8.-) (Acyl-CoA dehydrogenase family member 8) (ACAD-8)	Acad8	0.147444	0.0817313	0.436403	0.0692542	0.320323	-0.0474453
				Q8JZN5	ACAD9_MOUSE	Complex I assembly factor ACAD9, mitochondrial (Acyl-CoA dehydrogenase family member 9) (ACAD-9) (EC 1.3.8.-)	Acad9	0.0371733	0.121689	1.90813e-05	-0.174464	0.00102461	-0.148548
				P51174	ACADL_MOUSE	Long-chain specific acyl-CoA dehydrogenase, mitochondrial (LCAD) (EC 1.3.8.8)	Acadl	0.026431	0.148173	0.00496929	-0.0835128	0.000926707	-0.125953
				P45952	ACADM_MOUSE	Medium-chain specific acyl-CoA dehydrogenase, mitochondrial (MCAD) (EC 1.3.8.7)	Acadm	0.30188	0.0398355	0.872601	-0.00868607	0.497906	-0.0349305
				Q9DBL1	ACDSB_MOUSE	Short/branched chain specific acyl-CoA dehydrogenase, mitochondrial (SBCAD) (EC 1.3.8.5) (2-methyl branched chain acyl-CoA dehydrogenase) (2-MEBCAD) (2-methylbutyryl-coenzyme A dehydrogenase) (2-methylbutyryl-CoA dehydrogenase)	Acadsb	0.247336	-0.0464418	0.0160376	-0.109008	0.327993	-0.0435884
+			MC_FC	P50544	ACADV_MOUSE	Very long-chain specific acyl-CoA dehydrogenase, mitochondrial (EC 1.3.8.9) (MVLCAD) (VLCAD)	Acadvl	0.00795539	0.273801	0.027795	-0.105778	0.00430929	-0.211472
+	+		MC_FC;FN_FC	Q61282	PGCA_MOUSE	Aggrecan core protein (Cartilage-specific proteoglycan core protein) (CSPCP)	Acan	0.00228571	0.672482	0.00325039	-0.432074	0.00276442	-0.45676
				Q6ZQK5	ACAP2_MOUSE	Arf-GAP with coiled-coil, ANK repeat and PH domain-containing protein 2 (Centaurin-beta-2) (Cnt-b2)	Acap2	0.766405	0.00948262	0.133395	0.152889	0.345887	0.161159
				Q8QZT1	THIL_MOUSE	Acetyl-CoA acetyltransferase, mitochondrial (EC 2.3.1.9) (Acetoacetyl-CoA thiolase)	Acat1	0.616088	-0.0139723	0.00150717	-0.0923367	0.689255	0.0090847
				Q8CAY6	THIC_MOUSE	Acetyl-CoA acetyltransferase, cytosolic (EC 2.3.1.9) (Cytosolic acetoacetyl-CoA thiolase)	Acat2	0.521798	0.0213583	0.631055	-0.0228748	0.319825	0.0370164
				Q8BMP6	GCP60_MOUSE	Golgi resident protein GCP60 (Acyl-CoA-binding domain-containing protein 3) (Golgi complex-associated protein 1) (GOCAP1) (Golgi phosphoprotein 1) (GOLPH1) (PBR- and PKA-associated protein 7) (Peripheral benzodiazepine receptor-associated protein PAP7)	Acbd3	0.262904	0.0809097	0.54172	0.13054	0.971539	0.00881219
				P09470	ACE_MOUSE	Angiotensin-converting enzyme (ACE) (EC 3.2.1.-) (EC 3.4.15.1) (Dipeptidyl carboxypeptidase I) (Kininase II) (CD antigen CD143) [Cleaved into: Angiotensin-converting enzyme, soluble form]	Ace	0.0246667	-0.218993	0.371159	0.191477	0.836823	-0.0496259
+			MC_FC	P21836	ACES_MOUSE	Acetylcholinesterase (AChE) (EC 3.1.1.7)	Ache	0.00941026	-0.261715	0.447065	0.0705278	0.574666	0.0534647
				Q9JIX8	ACINU_MOUSE	Apoptotic chromatin condensation inducer in the nucleus (Acinus)	Acin1	0.0481903	-0.199214	0.226057	-0.157693	0.553266	-0.0644746
				Q91V92	ACLY_MOUSE	ATP-citrate synthase (EC 2.3.3.8) (ATP-citrate (pro-S-)-lyase) (Citrate cleavage enzyme)	Acly	0.666391	0.0115733	0.565397	0.00426865	0.685483	-0.0112314
				P28271	ACOC_MOUSE	Cytoplasmic aconitate hydratase (Aconitase) (EC 4.2.1.3) (Citrate hydro-lyase) (Iron regulatory protein 1) (IRP1) (Iron-responsive element-binding protein 1) (IRE-BP 1)	Aco1	0.192822	0.0500789	0.53032	-0.016777	0.151075	-0.0384216
				Q99KI0	ACON_MOUSE	Aconitate hydratase, mitochondrial (Aconitase) (EC 4.2.1.3) (Citrate hydro-lyase)	Aco2	0.018268	0.151101	1.78737e-06	-0.185764	0.00107517	-0.0765052
				Q8VHQ9	ACO11_MOUSE	Acyl-coenzyme A thioesterase 11 (Acyl-CoA thioesterase 11) (EC 3.1.2.-) (Acyl-CoA thioester hydrolase 11) (Adipose-associated thioesterase) (Brown fat-inducible thioesterase) (BFIT) (Palmitoyl-coenzyme A thioesterase) (EC 3.1.2.2)	Acot11	0.0720188	0.107946	0.274276	-0.0650158	0.31481	-0.0471554
				Q9CQR4	ACO13_MOUSE	Acyl-coenzyme A thioesterase 13 (Acyl-CoA thioesterase 13) (EC 3.1.2.-) (Hotdog-fold thioesterase superfamily member 2) (Palmitoyl-CoA hydrolase) (EC 3.1.2.2) (Thioesterase superfamily member 2) (THEM2)	Acot13	0.351803	0.0397058	0.0677857	-0.17521	0.248389	-0.077039
				Q9QYR9	ACOT2_MOUSE	Acyl-coenzyme A thioesterase 2, mitochondrial (Acyl-CoA thioesterase 2) (EC 3.1.2.2) (Acyl coenzyme A thioester hydrolase) (MTE-I) (Very-long-chain acyl-CoA thioesterase)	Acot2	0.828538	0.00595069	0.379875	0.0133669	0.124331	-0.0543311
				Q91V12	BACH_MOUSE	Cytosolic acyl coenzyme A thioester hydrolase (EC 3.1.2.2) (Acyl-CoA thioesterase 7) (Brain acyl-CoA hydrolase) (BACH) (CTE-IIa) (CTE-II) (Long chain acyl-CoA thioester hydrolase)	Acot7	0.738395	-0.00843	0.0126463	-0.0551877	0.000537848	-0.109362
				Q9R0X4	ACOT9_MOUSE	Acyl-coenzyme A thioesterase 9, mitochondrial (Acyl-CoA thioesterase 9) (EC 3.1.2.-) (Acyl coenzyme A thioester hydrolase 2) (MTE-2) (Acyl-CoA thioester hydrolase 9) (Mitochondrial 48 kDa acyl-CoA thioester hydrolase 1) (Mt-ACT48.1) (Protein U8) (p48)	Acot9	0.496392	-0.0207157	0.0105538	-0.0591702	0.479292	-0.0194473
				Q9R0H0	ACOX1_MOUSE	Peroxisomal acyl-coenzyme A oxidase 1 (AOX) (EC 1.3.3.6) (Palmitoyl-CoA oxidase) [Cleaved into: Peroxisomal acyl-CoA oxidase 1, A chain; Peroxisomal acyl-CoA oxidase 1, B chain; Peroxisomal acyl-CoA oxidase 1, C chain]	Acox1	0.189998	-0.0768561	0.641817	0.0568388	0.670446	0.0467236
				Q9D358	PPAC_MOUSE	Low molecular weight phosphotyrosine protein phosphatase (LMW-PTP) (LMW-PTPase) (EC 3.1.3.48) (Low molecular weight cytosolic acid phosphatase) (EC 3.1.3.2)	Acp1	0.246442	0.0441895	0.186379	0.0387869	0.449217	-0.0302134
				Q8BP40	PPA6_MOUSE	Lysophosphatidic acid phosphatase type 6 (EC 3.1.3.2) (Acid phosphatase 6, lysophosphatidic) (Acid phosphatase-like protein 1) (PACPL1)	Acp6	0.100077	0.0936317	0.81842	-0.0155821	0.233377	-0.0714366
				Q99PU5	ACBG1_MOUSE	Long-chain-fatty-acid--CoA ligase ACSBG1 (EC 6.2.1.3) (Acyl-CoA synthetase bubblegum family member 1) (mBG1) (Gonadotropin-regulated long chain acyl CoA synthetase) (GR-LACS) (Lipidosin)	Acsbg1	0.0178574	0.169618	0.00207947	-0.0803595	0.00678278	-0.089901
				Q8VCW8	ACSF2_MOUSE	Medium-chain acyl-CoA ligase ACSF2, mitochondrial (EC 6.2.1.2)	Acsf2	0.913015	-0.00291634	0.821404	-0.00517273	0.0296411	-0.0766726
				Q3URE1	ACSF3_MOUSE	Malonate--CoA ligase ACSF3, mitochondrial (EC 6.2.1.n3) (Acyl-CoA synthetase family member 3)	Acsf3	0.315524	0.0406773	0.96546	-0.00649357	0.277887	0.0474613
				P41216	ACSL1_MOUSE	Long-chain-fatty-acid--CoA ligase 1 (EC 6.2.1.3) (Arachidonate--CoA ligase) (EC 6.2.1.15) (Long-chain acyl-CoA synthetase 1) (LACS 1) (Phytanate--CoA ligase) (EC 6.2.1.24)	Acsl1	0.764988	0.00998425	0.889685	-0.0066278	0.99769	-0.00018549
				Q9CZW4	ACSL3_MOUSE	Long-chain-fatty-acid--CoA ligase 3 (EC 6.2.1.3) (Arachidonate--CoA ligase) (EC 6.2.1.15) (Long-chain acyl-CoA synthetase 3) (LACS 3)	Acsl3	0.848017	0.00725842	0.826108	-0.0315394	0.328689	0.0612636
				Q91WC3	ACSL6_MOUSE	Long-chain-fatty-acid--CoA ligase 6 (EC 6.2.1.3) (Arachidonate--CoA ligase) (EC 6.2.1.15) (Long-chain acyl-CoA synthetase 6) (LACS 6)	Acsl6	0.0102039	0.203219	0.000880259	-0.128102	0.0184468	-0.0765471
				Q99NB1	ACS2L_MOUSE	Acetyl-coenzyme A synthetase 2-like, mitochondrial (EC 6.2.1.1) (Acetate--CoA ligase 2) (Acetyl-CoA synthetase 2) (AceCS2) (Acyl-CoA synthetase short-chain family member 1) (Propionate--CoA ligase) (EC 6.2.1.17)	Acss1	0.537768	-0.0209839	0.875785	0.0102973	0.572601	-0.0429389
				Q9QXG4	ACSA_MOUSE	Acetyl-coenzyme A synthetase, cytoplasmic (EC 6.2.1.1) (Acetate--CoA ligase) (Acetyl-CoA synthetase) (ACS) (AceCS) (Acetyl-CoA synthetase 1) (AceCS1) (Acyl-CoA synthetase short-chain family member 2) (Acyl-activating enzyme) (Propionate--CoA ligase) (EC 6.2.1.17)	Acss2	0.0303099	0.14556	0.00542852	-0.120465	0.0148613	-0.133293
				P68134	ACTS_MOUSE	Actin, alpha skeletal muscle (Alpha-actin-1) [Cleaved into: Actin, alpha skeletal muscle, intermediate form]	Acta1	0.08124	-0.087028	0.0417965	0.117672	0.00252216	0.173248
				P60710	ACTB_MOUSE	Actin, cytoplasmic 1 (Beta-actin) [Cleaved into: Actin, cytoplasmic 1, N-terminally processed]	Actb	0.0778739	-0.0829549	0.0194196	0.0239153	0.00102456	0.0804453
				P63260	ACTG_MOUSE	Actin, cytoplasmic 2 (Gamma-actin) [Cleaved into: Actin, cytoplasmic 2, N-terminally processed]	Actg1	0.0097478	-0.207181	0.0610017	-0.0812793	0.0159993	0.0646036
+			MC_FC	Q7TPR4	ACTN1_MOUSE	Alpha-actinin-1 (Alpha-actinin cytoskeletal isoform) (F-actin cross-linking protein) (Non-muscle alpha-actinin-1)	Actn1	0.00806723	-0.272049	0.0133589	0.11052	0.000259929	0.310984
				P57780	ACTN4_MOUSE	Alpha-actinin-4 (Non-muscle alpha-actinin 4)	Actn4	0.0498621	-0.106624	0.825864	0.00654316	0.00167548	0.10267
				Q9QZB7	ARP10_MOUSE	Actin-related protein 10 (Actin-related protein 11)	Actr10	0.693841	-0.0143821	0.912398	0.0121431	0.34831	0.0384376
				P61164	ACTZ_MOUSE	Alpha-centractin (Centractin) (ARP1) (Actin-RPV) (Centrosome-associated actin homolog)	Actr1a	0.111769	0.0774765	0.145992	0.0511947	0.874094	-0.00623417
				Q8R5C5	ACTY_MOUSE	Beta-centractin (Actin-related protein 1B) (ARP1B)	Actr1b	0.131399	-0.0682812	0.814817	-0.0112605	0.339699	0.0318179
				P61161	ARP2_MOUSE	Actin-related protein 2 (Actin-like protein 2)	Actr2	0.106745	-0.0748649	0.00247452	0.103508	0.00417267	0.110837
				Q99JY9	ARP3_MOUSE	Actin-related protein 3 (Actin-like protein 3)	Actr3	0.117387	-0.0662541	0.000678246	0.0993419	0.00474528	0.0694609
				Q641P0	ARP3B_MOUSE	Actin-related protein 3B (ARP3-beta) (Actin-like protein 3B)	Actr3b	0.353907	0.0522203	0.255206	0.171948	0.0291272	0.142078
+			MC_FC	Q99JW2	ACY1_MOUSE	Aminoacylase-1 (ACY-1) (EC 3.5.1.14) (N-acyl-L-amino-acid amidohydrolase)	Acy1	0.00595294	0.298079	0.0208507	-0.0903933	0.012925	-0.144077
				P56376	ACYP1_MOUSE	Acylphosphatase-1 (EC 3.6.1.7) (Acylphosphatase, organ-common type isozyme) (Acylphosphate phosphohydrolase 1)	Acyp1	0.0262319	0.144969	0.0418102	-0.0800824	0.0383061	-0.0452342
+			MC_FC	P56375	ACYP2_MOUSE	Acylphosphatase-2 (EC 3.6.1.7) (Acylphosphatase, muscle type isozyme) (Acylphosphate phosphohydrolase 2)	Acyp2	0.00597778	0.323021	0.0104386	-0.134034	0.00165553	-0.22532
				O35598	ADA10_MOUSE	Disintegrin and metalloproteinase domain-containing protein 10 (ADAM 10) (EC 3.4.24.81) (Kuzbanian protein homolog) (Mammalian disintegrin-metalloprotease) (CD antigen CD156c)	Adam10	0.0476579	0.151054	0.10818	-0.173488	0.698365	-0.0191481
				Q9R1V4	ADA11_MOUSE	Disintegrin and metalloproteinase domain-containing protein 11 (ADAM 11) (Metalloproteinase-like, disintegrin-like, and cysteine-rich protein) (MDC)	Adam11	0.0402108	-0.180891	0.912398	-0.00838828	0.460537	0.0869014
				Q9R1V6	ADA22_MOUSE	Disintegrin and metalloproteinase domain-containing protein 22 (ADAM 22)	Adam22	0.633264	-0.0144143	0.328102	-0.0358906	0.721495	0.0101252
				Q9R1V7	ADA23_MOUSE	Disintegrin and metalloproteinase domain-containing protein 23 (ADAM 23) (Metalloproteinase-like, disintegrin-like, and cysteine-rich protein 3) (MDC-3)	Adam23	0.0098635	0.217187	0.00197861	-0.223723	0.044267	-0.0613976
				P84309	ADCY5_MOUSE	Adenylate cyclase type 5 (EC 4.6.1.1) (ATP pyrophosphate-lyase 5) (Adenylate cyclase type V) (Adenylyl cyclase 5)	Adcy5	0.278125	0.0497396	0.00198418	0.331178	0.00064224	0.541505
				P51830	ADCY9_MOUSE	Adenylate cyclase type 9 (EC 4.6.1.1) (ATP pyrophosphate-lyase 9) (Adenylate cyclase type IX) (Adenylyl cyclase 9) (AC9) (Adenylyl cyclase type 10) (ACTP10)	Adcy9	0.314756	0.0638707	0.612214	-0.0938587	0.874497	-0.0202203
				Q9QYC0	ADDA_MOUSE	Alpha-adducin (Erythrocyte adducin subunit alpha)	Add1	0.107701	-0.0767465	0.0434323	-0.0620666	0.219117	0.0293264
				Q9QYB8	ADDB_MOUSE	Beta-adducin (Add97) (Erythrocyte adducin subunit beta)	Add2	0.104959	-0.0771656	0.0407385	-0.0575171	0.443645	0.0199614
				Q9QYB5	ADDG_MOUSE	Gamma-adducin (Adducin-like protein 70)	Add3	0.449752	0.025866	0.9077	0.00634289	0.322348	-0.0280013
				P28474	ADHX_MOUSE	Alcohol dehydrogenase class-3 (EC 1.1.1.1) (Alcohol dehydrogenase 2) (Alcohol dehydrogenase 5) (Alcohol dehydrogenase B2) (ADH-B2) (Alcohol dehydrogenase class-III) (Glutathione-dependent formaldehyde dehydrogenase) (FALDH) (FDH) (GSH-FDH) (EC 1.1.1.-) (S-(hydroxymethyl)glutathione dehydrogenase) (EC 1.1.1.284)	Adh5	0.0873896	0.0835381	0.216486	-0.0257163	0.175467	-0.0546489
+			MC_FC	P55264	ADK_MOUSE	Adenosine kinase (AK) (EC 2.7.1.20) (Adenosine 5'-phosphotransferase)	Adk	0.0101758	0.242045	0.2905	-0.0593007	0.00211165	-0.18107
				Q6PDY2	AEDO_MOUSE	2-aminoethanethiol dioxygenase (EC 1.13.11.19) (Cysteamine dioxygenase)	Ado	0.0448075	0.16189	0.116536	-0.147597	0.713885	-0.0179722
				P54923	ADPRH_MOUSE	[Protein ADP-ribosylarginine] hydrolase (ADP-ribosylarginine hydrolase) (EC 3.2.2.19) (ADP-ribose-L-arginine cleaving enzyme)	Adprh	0.879605	-0.00430393	0.0982987	0.0785506	0.298693	0.0405459
				Q99MK8	ARBK1_MOUSE	Beta-adrenergic receptor kinase 1 (Beta-ARK-1) (EC 2.7.11.15) (G-protein-coupled receptor kinase 2)	Adrbk1	0.0258882	-0.174215	0.0108396	0.0807884	0.116341	0.088309
				Q9JKV1	ADRM1_MOUSE	Proteasomal ubiquitin receptor ADRM1 (110 kDa cell membrane glycoprotein) (Gp110) (Adhesion-regulating molecule 1) (ARM-1) (Rpn13 homolog)	Adrm1	0.0971571	-0.198845	0.538237	-0.164168	0.595354	-0.309849
				P54822	PUR8_MOUSE	Adenylosuccinate lyase (ASL) (EC 4.3.2.2) (Adenylosuccinase) (ASase)	Adsl	0.349131	0.0330193	0.258722	-0.0520053	0.0341474	-0.0659189
				P46664	PURA2_MOUSE	Adenylosuccinate synthetase isozyme 2 (AMPSase 2) (AdSS 2) (EC 6.3.4.4) (Adenylosuccinate synthetase, acidic isozyme) (Adenylosuccinate synthetase, liver isozyme) (L-type adenylosuccinate synthetase) (IMP--aspartate ligase 2)	Adss	0.0505289	0.113192	0.653336	-0.0134988	0.0750052	-0.0512114
				P28650	PURA1_MOUSE	Adenylosuccinate synthetase isozyme 1 (AMPSase 1) (AdSS 1) (EC 6.3.4.4) (Adenylosuccinate synthetase like 1) (Adenylosuccinate synthetase, basic isozyme) (Adenylosuccinate synthetase, muscle isozyme) (M-type adenylosuccinate synthetase) (IMP--aspartate ligase 1)	Adssl1	0.00974063	0.213484	0.00063743	-0.171041	0.00608395	-0.0911622
				Q8JZQ2	AFG32_MOUSE	AFG3-like protein 2 (EC 3.4.24.-)	Afg3l2	0.503693	0.0207486	0.0145282	-0.0665054	0.814909	-0.00788879
				Q8BXK8	AGAP1_MOUSE	Arf-GAP with GTPase, ANK repeat and PH domain-containing protein 1 (AGAP-1) (Centaurin-gamma-2) (Cnt-g2)	Agap1	0.1073	-0.099689	0.33286	0.0713985	0.354222	0.077801
				Q3UHD9	AGAP2_MOUSE	Arf-GAP with GTPase, ANK repeat and PH domain-containing protein 2 (AGAP-2) (Centaurin-gamma-1) (Cnt-g1) (Phosphatidylinositol 3-kinase enhancer) (PIKE)	Agap2	0.923357	0.00388288	0.531871	0.104433	0.980036	-0.00380397
				Q8VHH5	AGAP3_MOUSE	Arf-GAP with GTPase, ANK repeat and PH domain-containing protein 3 (AGAP-3) (CRAM-associated GTPase) (CRAG) (Centaurin-gamma-3) (Cnt-g3) (MR1-interacting protein) (MRIP-1)	Agap3	0.210133	-0.0511239	0.940696	-0.0054388	0.87646	-0.011517
				Q8K2K6	AGFG1_MOUSE	Arf-GAP domain and FG repeat-containing protein 1 (HIV-1 Rev-binding protein homolog) (Nucleoporin-like protein RIP)	Agfg1	0.0399779	-0.181769	0.129055	0.144239	0.449217	0.09338
				Q80WC7	AGFG2_MOUSE	Arf-GAP domain and FG repeat-containing protein 2 (HIV-1 Rev-binding protein-like protein) (Rev/Rex activation domain-binding protein related) (RAB-R)	Agfg2	0.854407	-0.0120263	0.859332	-0.0632942	0.933342	-0.0194631
				Q9ESW4	AGK_MOUSE	Acylglycerol kinase, mitochondrial (EC 2.7.1.107) (EC 2.7.1.138) (EC 2.7.1.94) (Multiple substrate lipid kinase) (MuLK) (Multi-substrate lipid kinase)	Agk	0.185007	-0.0551243	0.825864	0.00944805	0.00474528	0.0857029
				Q8CJG0	AGO2_MOUSE	Protein argonaute-2 (Argonaute2) (mAgo2) (EC 3.1.26.n2) (Argonaute RISC catalytic component 2) (Eukaryotic translation initiation factor 2C 2) (eIF-2C 2) (eIF2C 2) (Piwi/argonaute family protein meIF2C2) (Protein slicer)	Ago2	0.0901169	-0.137368	0.965505	0.00614572	0.322348	0.123333
				Q8CJF8	AGO4_MOUSE	Protein argonaute-4 (Argonaute4) (mAgo4) (Argonaute RISC catalytic component 4) (Eukaryotic translation initiation factor 2C 4) (eIF-2C 4) (eIF2C 4) (Piwi/argonaute family protein meIF2C4)	Ago4	0.0435214	-0.138675	0.412856	-0.0788319	0.371682	0.0646658
				O35083	PLCA_MOUSE	1-acyl-sn-glycerol-3-phosphate acyltransferase alpha (EC 2.3.1.51) (1-acylglycerol-3-phosphate O-acyltransferase 1) (1-AGP acyltransferase 1) (1-AGPAT 1) (Lysophosphatidic acid acyltransferase alpha) (LPAAT-alpha)	Agpat1	0.129918	-0.0850527	0.387136	0.0874016	0.186015	0.107195
				Q9D517	PLCC_MOUSE	1-acyl-sn-glycerol-3-phosphate acyltransferase gamma (EC 2.3.1.51) (1-acylglycerol-3-phosphate O-acyltransferase 3) (1-AGP acyltransferase 3) (1-AGPAT 3) (Lysophosphatidic acid acyltransferase gamma) (LPAAT-gamma)	Agpat3	0.213026	0.0546231	0.581675	-0.0229235	0.306018	-0.047754
				Q8K4X7	PLCD_MOUSE	1-acyl-sn-glycerol-3-phosphate acyltransferase delta (EC 2.3.1.51) (1-acylglycerol-3-phosphate O-acyltransferase 4) (1-AGP acyltransferase 4) (1-AGPAT 4) (Lysophosphatidic acid acyltransferase delta) (LPAAT-delta)	Agpat4	0.0838859	0.105414	0.12488	0.112766	0.0995008	-0.0669172
				Q9D1E8	PLCE_MOUSE	1-acyl-sn-glycerol-3-phosphate acyltransferase epsilon (EC 2.3.1.51) (1-acylglycerol-3-phosphate O-acyltransferase 5) (1-AGP acyltransferase 5) (1-AGPAT 5) (Lysophosphatidic acid acyltransferase epsilon) (LPAAT-epsilon)	Agpat5	0.242226	0.0886836	0.319986	-0.135148	0.801781	-0.0878928
				A2ASQ1	AGRIN_MOUSE	Agrin [Cleaved into: Agrin N-terminal 110 kDa subunit; Agrin C-terminal 110 kDa subunit; Agrin C-terminal 90 kDa fragment (C90); Agrin C-terminal 22 kDa fragment (C22)]	Agrn	0.154579	0.0927205	0.839754	-0.0257511	0.929282	-0.0113316
				P50247	SAHH_MOUSE	Adenosylhomocysteinase (AdoHcyase) (EC 3.3.1.1) (CUBP) (Liver copper-binding protein) (S-adenosyl-L-homocysteine hydrolase)	Ahcy	0.744969	0.00954676	0.261649	0.0436954	0.464298	0.0240345
				Q80SW1	SAHH2_MOUSE	S-adenosylhomocysteine hydrolase-like protein 1 (IP3R-binding protein released with inositol 1,4,5-trisphosphate) (Putative adenosylhomocysteinase 2) (S-adenosyl-L-homocysteine hydrolase 2) (AdoHcyase 2)	Ahcyl1	0.122374	0.0672894	0.00771774	-0.055974	0.746072	-0.00704193
				Q68FL4	SAHH3_MOUSE	Putative adenosylhomocysteinase 3 (AdoHcyase 3) (EC 3.3.1.1) (Long-IRBIT) (S-adenosyl-L-homocysteine hydrolase 3) (S-adenosylhomocysteine hydrolase-like protein 2)	Ahcyl2	0.161085	0.0625749	0.120031	0.0468249	0.55042	0.0196328
+			MC_FC	Q8K3E5	AHI1_MOUSE	Jouberin (Abelson helper integration site 1 protein) (AHI-1)	Ahi1	0.00215385	-0.424042	0.00783546	0.153703	0.000977644	0.132123
				Q8BK64	AHSA1_MOUSE	Activator of 90 kDa heat shock protein ATPase homolog 1 (AHA1)	Ahsa1	0.385313	0.0285735	0.225295	-0.0455551	0.0204636	-0.0747085
+			MC_FC	P29699	FETUA_MOUSE	Alpha-2-HS-glycoprotein (Countertrypin) (Fetuin-A)	Ahsg	0.00832685	-0.338408	0.0161231	-0.263467	0.096677	-0.112798
+			MC_FC	Q8C4Q6	AIDA_MOUSE	Axin interactor, dorsalization-associated protein (Axin interaction partner and dorsalization antagonist)	Aida	0.00856579	-0.326829	0.248283	0.119612	0.14768	0.151134
				Q9Z0X1	AIFM1_MOUSE	Apoptosis-inducing factor 1, mitochondrial (EC 1.6.99.-) (Programmed cell death protein 8)	Aifm1	0.0311587	0.144507	0.00446243	-0.16971	0.072412	-0.0595603
				Q3TY86	AIFM3_MOUSE	Apoptosis-inducing factor 3 (EC 1.-.-.-) (Apoptosis-inducing factor-like protein)	Aifm3	0.61246	-0.0164723	0.181402	-0.086153	0.146277	0.0757427
				P31230	AIMP1_MOUSE	Aminoacyl tRNA synthase complex-interacting multifunctional protein 1 (Multisynthase complex auxiliary component p43) [Cleaved into: Endothelial monocyte-activating polypeptide 2 (EMAP-2) (Endothelial monocyte-activating polypeptide II) (EMAP-II) (Small inducible cytokine subfamily E member 1)]	Aimp1	0.0391126	0.132515	0.0923067	-0.0771253	0.0145996	-0.11857
				Q8R010	AIMP2_MOUSE	Aminoacyl tRNA synthase complex-interacting multifunctional protein 2 (Multisynthase complex auxiliary component p38) (Protein JTV-1)	Aimp2	0.0604444	0.140996	0.991649	0.000807047	0.325135	-0.104299
				O08915	AIP_MOUSE	AH receptor-interacting protein (AIP) (Aryl-hydrocarbon receptor-interacting protein)	Aip	0.111126	0.0840662	0.432164	0.0505645	0.00152164	0.0614896
				Q9R0Y5	KAD1_MOUSE	Adenylate kinase isoenzyme 1 (AK 1) (EC 2.7.4.3) (EC 2.7.4.6) (ATP-AMP transphosphorylase 1) (ATP:AMP phosphotransferase) (Adenylate monophosphate kinase) (Myokinase)	Ak1	0.0601485	0.0988526	0.0635155	-0.0359268	0.147687	-0.0335722
				Q9WTP6	KAD2_MOUSE	Adenylate kinase 2, mitochondrial (AK 2) (EC 2.7.4.3) (ATP-AMP transphosphorylase 2) (ATP:AMP phosphotransferase) (Adenylate monophosphate kinase)	Ak2	0.0338559	0.127279	0.159341	0.0363858	0.690743	-0.0205615
				Q9WTP7	KAD3_MOUSE	GTP:AMP phosphotransferase AK3, mitochondrial (EC 2.7.4.10) (Adenylate kinase 3) (AK 3) (Adenylate kinase 3 alpha-like 1)	Ak3	0.0683042	0.0912075	0.0144509	-0.0631409	0.130398	-0.0435872
				Q9WUR9	KAD4_MOUSE	Adenylate kinase 4, mitochondrial (AK 4) (EC 2.7.4.10) (EC 2.7.4.6) (Adenylate kinase 3-like) (Adenylate kinase isoenzyme 4) (GTP:AMP phosphotransferase AK4)	Ak4	0.0230153	-0.176402	0.203545	0.0375588	0.917423	0.00687408
				O88845	AKA10_MOUSE	A-kinase anchor protein 10, mitochondrial (AKAP-10) (Dual specificity A kinase-anchoring protein 2) (D-AKAP-2) (Protein kinase A-anchoring protein 10) (PRKA10)	Akap10	0.645213	-0.0295963	0.91551	0.0367181	0.911274	-0.0305605
				Q9WTQ5	AKA12_MOUSE	A-kinase anchor protein 12 (AKAP-12) (Germ cell lineage protein gercelin) (Src-suppressed C kinase substrate) (SSeCKS)	Akap12	0.139105	0.0604377	0.750701	0.00655222	0.115165	-0.041358
				D3YVF0	AKAP5_MOUSE	A-kinase anchor protein 5 (AKAP-5) (A-kinase anchor protein 150 kDa) (AKAP 150) (P150) (cAMP-dependent protein kinase regulatory subunit II high affinity-binding protein)	Akap5	0.0722309	-0.121699	0.212609	0.0967507	0.00361439	0.309676
				O55074	AKA7A_MOUSE	A-kinase anchor protein 7 isoform alpha (AKAP-7 isoform alpha) (A-kinase anchor protein 18) (AKAP-18) (A-kinase anchor protein 9 kDa) (AKAP 9) (Protein kinase A-anchoring protein 7 isoform alpha) (PRKA7 isoform alpha)	Akap7	0.0677747	-0.0992942	0.119682	0.0834701	0.0458065	0.0701714
				Q9JII6	AK1A1_MOUSE	Aldo-keto reductase family 1 member A1 (EC 1.1.1.2) (EC 1.1.1.33) (EC 1.1.1.372) (EC 1.1.1.54) (Alcohol dehydrogenase [NADP(+)]) (Aldehyde reductase) (Glucuronate reductase) (EC 1.1.1.19) (Glucuronolactone reductase) (EC 1.1.1.20)	Akr1a1	0.87175	-0.00408888	0.182578	-0.023315	0.870604	0.00380468
				P45376	ALDR_MOUSE	Aldo-keto reductase family 1 member B1 (EC 1.1.1.300) (EC 1.1.1.372) (EC 1.1.1.54) (Aldehyde reductase) (Aldo-keto reductase family 1 member B3) (Aldose reductase) (AR) (EC 1.1.1.21)	Akr1b1	0.281586	-0.0400896	0.0565333	0.0653768	0.354222	0.023294
				P21300	ALD1_MOUSE	Aldo-keto reductase family 1 member B7 (EC 1.1.1.21) (Aldehyde reductase) (AR) (Aldose reductase-related protein 1) (MVDP) (Vas deferens androgen-dependent protein)	Akr1b7	0.0155494	0.197285	0.00512638	-0.227945	0.00112028	-0.201958
				P45377	ALD2_MOUSE	Aldose reductase-related protein 2 (AR) (EC 1.1.1.21) (Aldehyde reductase) (Fibroblast growth factor-regulated protein) (Protein FR-1)	Akr1b8	0.0215404	0.218579	0.0521433	-0.185818	0.630857	-0.0326416
				Q9DCT1	AKCL2_MOUSE	1,5-anhydro-D-fructose reductase (AF reductase) (EC 1.1.1.263) (Aldo-keto reductase family 1 member C-like protein 2) (Aldo-keto reductase family 1 member E1) (Aldo-keto reductase family 1 member E2)	Akr1e2	0.728113	-0.0114925	0.488881	0.0503659	0.226108	0.137659
				Q8CG76	ARK72_MOUSE	Aflatoxin B1 aldehyde reductase member 2 (EC 1.1.1.n11) (Succinic semialdehyde reductase) (SSA reductase)	Akr7a2	0.132524	0.0775108	0.289995	-0.046931	0.996605	-0.000367165
				P31750	AKT1_MOUSE	RAC-alpha serine/threonine-protein kinase (EC 2.7.11.1) (AKT1 kinase) (Protein kinase B) (PKB) (Protein kinase B alpha) (PKB alpha) (Proto-oncogene c-Akt) (RAC-PK-alpha) (Thymoma viral proto-oncogene)	Akt1	0.973801	-0.00105166	0.0523459	-0.10951	0.187041	-0.134377
				P10518	HEM2_MOUSE	Delta-aminolevulinic acid dehydratase (ALADH) (EC 4.2.1.24) (Porphobilinogen synthase)	Alad	0.440086	0.0274832	0.297475	-0.0518074	0.466477	-0.0295517
+	+		MC_FC;FN_FC	P07724	ALBU_MOUSE	Albumin	Alb	0	-0.548261	1.31443e-06	-0.614068	3.37251e-07	-0.316397
				Q61490	CD166_MOUSE	CD166 antigen (Activated leukocyte cell adhesion molecule) (BEN) (Protein DM-GRASP) (CD antigen CD166)	Alcam	0.00983432	-0.229288	0.00017074	0.224796	0.00124702	0.203053
				Q9Z110	P5CS_MOUSE	Delta-1-pyrroline-5-carboxylate synthase (P5CS) (Aldehyde dehydrogenase family 18 member A1) [Includes: Glutamate 5-kinase (GK) (EC 2.7.2.11) (Gamma-glutamyl kinase); Gamma-glutamyl phosphate reductase (GPR) (EC 1.2.1.41) (Glutamate-5-semialdehyde dehydrogenase) (Glutamyl-gamma-semialdehyde dehydrogenase)]	Aldh18a1	0.0464479	0.137622	0.264237	-0.0685923	0.157439	-0.102452
				P24549	AL1A1_MOUSE	Retinal dehydrogenase 1 (RALDH 1) (RalDH1) (EC 1.2.1.-) (EC 1.2.1.36) (ALDH-E1) (ALHDII) (Aldehyde dehydrogenase family 1 member A1) (Aldehyde dehydrogenase, cytosolic)	Aldh1a1	0.0861465	0.0868444	0.000295713	0.286548	0.663243	0.0144758
				Q9CZS1	AL1B1_MOUSE	Aldehyde dehydrogenase X, mitochondrial (EC 1.2.1.3) (Aldehyde dehydrogenase family 1 member B1)	Aldh1b1	0.158915	-0.0626478	0.0796062	0.0737433	0.00477855	0.123903
				Q8R0Y6	AL1L1_MOUSE	Cytosolic 10-formyltetrahydrofolate dehydrogenase (10-FTHFDH) (FDH) (EC 1.5.1.6) (Aldehyde dehydrogenase family 1 member L1)	Aldh1l1	0.0683783	-0.0959687	0.0194196	-0.0814924	0.85515	0.00634193
				P47738	ALDH2_MOUSE	Aldehyde dehydrogenase, mitochondrial (EC 1.2.1.3) (AHD-M1) (ALDH class 2) (ALDH-E2) (ALDHI)	Aldh2	0.0374056	0.130442	0.0104386	-0.067162	0.0268547	-0.084744
				P47740	AL3A2_MOUSE	Aldehyde dehydrogenase family 3 member A2 (EC 1.2.1.3) (EC 1.2.1.94) (Aldehyde dehydrogenase 3) (Fatty aldehyde dehydrogenase)	Aldh3a2	0.342953	0.032248	0.619948	0.020848	0.409762	0.0164027
				Q80VQ0	AL3B1_MOUSE	Aldehyde dehydrogenase family 3 member B1 (EC 1.2.1.28) (EC 1.2.1.5) (EC 1.2.1.7) (Aldehyde dehydrogenase 7)	Aldh3b1	0.0764535	0.12963	0.676614	-0.0553212	0.432617	-0.0546024
				Q8CHT0	AL4A1_MOUSE	Delta-1-pyrroline-5-carboxylate dehydrogenase, mitochondrial (P5C dehydrogenase) (EC 1.2.1.88) (Aldehyde dehydrogenase family 4 member A1) (L-glutamate gamma-semialdehyde dehydrogenase)	Aldh4a1	0.386727	-0.0291233	0.9142	-0.00395322	0.791968	-0.015481
				Q8BWF0	SSDH_MOUSE	Succinate-semialdehyde dehydrogenase, mitochondrial (EC 1.2.1.24) (Aldehyde dehydrogenase family 5 member A1) (NAD(+)-dependent succinic semialdehyde dehydrogenase)	Aldh5a1	0.694929	-0.010056	0.0383525	-0.0364823	0.010205	0.0381174
				Q9EQ20	MMSA_MOUSE	Methylmalonate-semialdehyde dehydrogenase [acylating], mitochondrial (MMSDH) (Malonate-semialdehyde dehydrogenase [acylating]) (EC 1.2.1.18) (EC 1.2.1.27) (Aldehyde dehydrogenase family 6 member A1)	Aldh6a1	0.091162	-0.0737538	0.00107496	0.0568647	0.00614305	0.057703
				Q9DBF1	AL7A1_MOUSE	Alpha-aminoadipic semialdehyde dehydrogenase (Alpha-AASA dehydrogenase) (EC 1.2.1.31) (Aldehyde dehydrogenase family 7 member A1) (EC 1.2.1.3) (Antiquitin-1) (Betaine aldehyde dehydrogenase) (EC 1.2.1.8) (Delta1-piperideine-6-carboxylate dehydrogenase) (P6c dehydrogenase)	Aldh7a1	0.0482072	-0.109966	0.111473	-0.0299439	0.0581666	0.0342212
				Q9JLJ2	AL9A1_MOUSE	4-trimethylaminobutyraldehyde dehydrogenase (TMABA-DH) (TMABADH) (EC 1.2.1.47) (Aldehyde dehydrogenase family 9 member A1) (EC 1.2.1.3)	Aldh9a1	0.235465	-0.0446129	0.640044	-0.00995064	0.721495	0.0110803
				P05064	ALDOA_MOUSE	Fructose-bisphosphate aldolase A (EC 4.1.2.13) (Aldolase 1) (Muscle-type aldolase)	Aldoa	0.139119	-0.0634489	0.153099	-0.0284982	0.0323852	0.0428038
				P05063	ALDOC_MOUSE	Fructose-bisphosphate aldolase C (EC 4.1.2.13) (Aldolase 3) (Brain-type aldolase) (Scrapie-responsive protein 2) (Zebrin II)	Aldoc	0.00935	0.211603	8.02816e-05	-0.155184	0.00064224	-0.110601
				Q9DBE8	ALG2_MOUSE	Alpha-1,3/1,6-mannosyltransferase ALG2 (EC 2.4.1.132) (EC 2.4.1.257) (Asparagine-linked glycosylation protein 2 homolog) (GDP-Man:Man(1)GlcNAc(2)-PP-Dol alpha-1,3-mannosyltransferase) (GDP-Man:Man(1)GlcNAc(2)-PP-dolichol mannosyltransferase) (GDP-Man:Man(2)GlcNAc(2)-PP-Dol alpha-1,6-mannosyltransferase)	Alg2	0.603496	-0.0155697	0.00374732	0.0750463	0.895805	0.00694036
				O08583	THOC4_MOUSE	THO complex subunit 4 (Tho4) (Ally of AML-1 and LEF-1) (Aly/REF export factor) (REF1-I) (RNA and export factor-binding protein 1) (Transcriptional coactivator Aly/REF)	Alyref	0.513218	-0.0309122	0.927412	0.0166366	0.0137839	0.140927
				Q8CCJ4	AMER2_MOUSE	APC membrane recruitment protein 2 (Amer2) (Protein FAM123A)	Amer2	0.021789	-0.158962	8.85859e-05	-0.119432	0.722076	0.033145
				Q9DBT5	AMPD2_MOUSE	AMP deaminase 2 (EC 3.5.4.6) (AMP deaminase isoform L)	Ampd2	0.266852	-0.0406117	0.801732	0.00804186	0.128208	-0.0445275
				Q7TQF7	AMPH_MOUSE	Amphiphysin	Amph	0.0499114	-0.111889	0.331748	-0.0217795	0.0142145	0.0631471
				Q02357	ANK1_MOUSE	Ankyrin-1 (ANK-1) (Erythrocyte ankyrin)	Ank1	0.0273928	0.157575	0.000364684	-0.333648	0.000100444	-0.153644
				Q8C8R3	ANK2_MOUSE	Ankyrin-2 (ANK-2) (Ankyrin-B) (Brain ankyrin)	Ank2	0.0165833	-0.157345	0.000194995	0.0634704	0.000259929	0.090313
				G5E8K5	ANK3_MOUSE	Ankyrin-3 (ANK-3) (Ankyrin-G)	Ank3	0.358726	-0.0277786	0.0020951	-0.150063	0.289628	-0.0147309
				Q810B6	ANFY1_MOUSE	Rabankyrin-5 (Rank-5) (Ankyrin repeat and FYVE domain-containing protein 1) (Ankyrin repeats hooked to a zinc finger motif)	Ankfy1	0.182069	0.105073	0.159439	0.272063	0.282265	0.264461
				Q9JHZ2	ANKH_MOUSE	Progressive ankylosis protein (Fn54 protein)	Ankh	0.0180606	0.248484	0.751452	0.0636508	0.271729	-0.191374
				Q3TPE9	ANKY2_MOUSE	Ankyrin repeat and MYND domain-containing protein 2	Ankmy2	0.237253	0.057271	0.0518046	0.0926423	0.823734	0.0186527
				Q3UUF8	AN34B_MOUSE	Ankyrin repeat domain-containing protein 34B (Dendritic cell progenitor protein of 58 kDa)	Ankrd34b	0.157902	-0.0767317	0.016604	0.221197	0.282794	0.0785925
				Q8BIZ1	ANS1B_MOUSE	Ankyrin repeat and sterile alpha motif domain-containing protein 1B (Amyloid-beta protein intracellular domain-associated protein 1) (AIDA-1) (E2A-PBX1-associated protein) (EB-1)	Anks1b	0.019719	-0.243003	0.995521	0.000694752	0.717155	0.0434637
+			MC_FC	Q8K298	ANLN_MOUSE	Anillin	Anln	0.00302703	0.406674	0.417449	0.0461049	0.000149121	-0.158401
				Q6PB70	ANO8_MOUSE	Anoctamin-8 (Transmembrane protein 16H)	Ano8	0.308121	0.0603421	0.113981	-0.236525	0.0995008	-0.254708
				O35381	AN32A_MOUSE	Acidic leucine-rich nuclear phosphoprotein 32 family member A (Acidic nuclear phosphoprotein pp32) (Leucine-rich acidic nuclear protein) (LANP) (Potent heat-stable protein phosphatase 2A inhibitor I1PP2A)	Anp32a	0.124389	-0.0774193	0.966964	0.00263166	0.315861	0.043292
				P97822	AN32E_MOUSE	Acidic leucine-rich nuclear phosphoprotein 32 family member E (Cerebellar postnatal development protein 1) (LANP-like protein) (LANP-L)	Anp32e	0.210487	0.0806415	0.461163	0.132031	0.882279	0.016788
				P07356	ANXA2_MOUSE	Annexin A2 (Annexin II) (Annexin-2) (Calpactin I heavy chain) (Calpactin-1 heavy chain) (Chromobindin-8) (Lipocortin II) (Placental anticoagulant protein IV) (PAP-IV) (Protein I) (p36)	Anxa2	0.0363368	0.153162	0.988125	-0.0016942	0.00924464	-0.318632
				O35639	ANXA3_MOUSE	Annexin A3 (35-alpha calcimedin) (Annexin III) (Annexin-3) (Lipocortin III) (Placental anticoagulant protein III) (PAP-III)	Anxa3	0.0363959	0.166607	0.804767	-0.0293097	0.201299	-0.0875018
+			MC_FC	P48036	ANXA5_MOUSE	Annexin A5 (Anchorin CII) (Annexin V) (Annexin-5) (Calphobindin I) (CBP-I) (Endonexin II) (Lipocortin V) (Placental anticoagulant protein 4) (PP4) (Placental anticoagulant protein I) (PAP-I) (Thromboplastin inhibitor) (Vascular anticoagulant-alpha) (VAC-alpha)	Anxa5	0.00127273	0.46302	0.0245425	-0.0375061	6.30573e-05	-0.279722
+			MC_FC	P14824	ANXA6_MOUSE	Annexin A6 (67 kDa calelectrin) (Annexin VI) (Annexin-6) (Calphobindin-II) (CPB-II) (Chromobindin-20) (Lipocortin VI) (Protein III) (p68) (p70)	Anxa6	0.00326214	0.341958	6.29418e-05	-0.121606	6.70118e-05	-0.138913
				Q07076	ANXA7_MOUSE	Annexin A7 (Annexin VII) (Annexin-7) (Synexin)	Anxa7	0.562564	0.0178914	0.869752	0.0138869	0.540347	0.018095
				O35643	AP1B1_MOUSE	AP-1 complex subunit beta-1 (Adaptor protein complex AP-1 subunit beta-1) (Adaptor-related protein complex 1 subunit beta-1) (Beta-1-adaptin) (Beta-adaptin 1) (Clathrin assembly protein complex 1 beta large chain) (Golgi adaptor HA1/AP1 adaptin beta subunit)	Ap1b1	0.107207	-0.0713425	0.172057	-0.0249391	0.926169	0.00214481
				P22892	AP1G1_MOUSE	AP-1 complex subunit gamma-1 (Adaptor protein complex AP-1 subunit gamma-1) (Adaptor-related protein complex 1 subunit gamma-1) (Clathrin assembly protein complex 1 gamma-1 large chain) (Gamma-adaptin) (Gamma1-adaptin) (Golgi adaptor HA1/AP1 adaptin subunit gamma-1)	Ap1g1	0.306597	-0.0373521	0.0510282	0.0480781	0.158686	0.0454111
				P35585	AP1M1_MOUSE	AP-1 complex subunit mu-1 (AP-mu chain family member mu1A) (Adaptor protein complex AP-1 subunit mu-1) (Adaptor-related protein complex 1 subunit mu-1) (Clathrin assembly protein complex 1 mu-1 medium chain 1) (Clathrin coat assembly protein AP47) (Clathrin coat-associated protein AP47) (Golgi adaptor HA1/AP1 adaptin mu-1 subunit) (Mu-adaptin 1) (Mu1A-adaptin)	Ap1m1	0.144669	-0.0749485	0.965057	-0.00420594	0.633719	0.0281684
				Q9DB50	AP1S2_MOUSE	AP-1 complex subunit sigma-2 (Adaptor protein complex AP-1 subunit sigma-1B) (Adaptor-related protein complex 1 subunit sigma-1B) (Clathrin assembly protein complex 1 sigma-1B small chain) (Golgi adaptor HA1/AP1 adaptin sigma-1B subunit) (Sigma 1B subunit of AP-1 clathrin) (Sigma-adaptin 1B) (Sigma1B-adaptin)	Ap1s2	0.286966	-0.0411053	0.864934	-0.00853801	0.78727	0.00646591
				P17426	AP2A1_MOUSE	AP-2 complex subunit alpha-1 (100 kDa coated vesicle protein A) (Adaptor protein complex AP-2 subunit alpha-1) (Adaptor-related protein complex 2 subunit alpha-1) (Alpha-adaptin A) (Alpha1-adaptin) (Clathrin assembly protein complex 2 alpha-A large chain) (Plasma membrane adaptor HA2/AP2 adaptin alpha A subunit)	Ap2a1	0.052819	-0.106989	0.737783	-0.00929117	0.00658742	0.0677481
+			MC_FC	P17427	AP2A2_MOUSE	AP-2 complex subunit alpha-2 (100 kDa coated vesicle protein C) (Adaptor protein complex AP-2 subunit alpha-2) (Adaptor-related protein complex 2 subunit alpha-2) (Alpha-adaptin C) (Alpha2-adaptin) (Clathrin assembly protein complex 2 alpha-C large chain) (Plasma membrane adaptor HA2/AP2 adaptin alpha C subunit)	Ap2a2	0.00584971	-0.280061	3.85488e-06	0.164113	0.00011667	0.160629
				Q9DBG3	AP2B1_MOUSE	AP-2 complex subunit beta (AP105B) (Adaptor protein complex AP-2 subunit beta) (Adaptor-related protein complex 2 subunit beta) (Beta-2-adaptin) (Beta-adaptin) (Clathrin assembly protein complex 2 beta large chain) (Plasma membrane adaptor HA2/AP2 adaptin beta subunit)	Ap2b1	0.0116981	-0.189988	0.763736	0.0077877	0.0159383	0.0536523
				P84091	AP2M1_MOUSE	AP-2 complex subunit mu (AP-2 mu chain) (Adaptor protein complex AP-2 subunit mu) (Adaptor-related protein complex 2 subunit mu) (Clathrin assembly protein complex 2 mu medium chain) (Clathrin coat assembly protein AP50) (Clathrin coat-associated protein AP50) (Mu2-adaptin) (Plasma membrane adaptor AP-2 50 kDa protein)	Ap2m1	0.010963	-0.196732	0.126389	0.0211463	0.0335509	0.0590568
				P62743	AP2S1_MOUSE	AP-2 complex subunit sigma (Adaptor protein complex AP-2 subunit sigma) (Adaptor-related protein complex 2 subunit sigma) (Clathrin assembly protein 2 sigma small chain) (Clathrin coat assembly protein AP17) (Clathrin coat-associated protein AP17) (Plasma membrane adaptor AP-2 17 kDa protein) (Sigma-adaptin 3b) (Sigma2-adaptin)	Ap2s1	0.0338976	-0.142605	0.866093	0.00717974	0.523162	0.0292444
				Q9JME5	AP3B2_MOUSE	AP-3 complex subunit beta-2 (Adaptor protein complex AP-3 subunit beta-2) (Adaptor-related protein complex 3 subunit beta-2) (Beta-3B-adaptin) (Clathrin assembly protein complex 3 beta-2 large chain)	Ap3b2	0.0311503	-0.127217	0.00135565	0.0998416	0.00133922	0.0648599
				O54774	AP3D1_MOUSE	AP-3 complex subunit delta-1 (AP-3 complex subunit delta) (Adaptor-related protein complex 3 subunit delta-1) (Delta-adaptin) (mBLVR1)	Ap3d1	0.0156257	-0.172247	0.0204822	0.0527749	0.0265079	0.0661745
				Q8R2R9	AP3M2_MOUSE	AP-3 complex subunit mu-2 (Adaptor-related protein complex 3 subunit mu-2) (Clathrin assembly protein assembly protein complex 3 mu-2 medium chain) (Clathrin coat assembly protein AP47 homolog 2) (Clathrin coat-associated protein AP47 homolog 2) (Golgi adaptor AP-1 47 kDa protein homolog 2) (HA1 47 kDa subunit homolog 2) (Mu3B-adaptin) (m3B) (P47B)	Ap3m2	0.0227588	-0.19306	0.00189017	0.130508	0.196512	0.0919883
				Q9DCR2	AP3S1_MOUSE	AP-3 complex subunit sigma-1 (AP-3 complex subunit sigma-3A) (Adaptor-related protein complex 3 subunit sigma-1) (Sigma-3A-adaptin) (Sigma3A-adaptin) (Sigma-adaptin 3a)	Ap3s1	0.0260381	-0.177693	0.368535	0.0670092	0.0508271	0.0770962
				Q8BSZ2	AP3S2_MOUSE	AP-3 complex subunit sigma-2 (AP-3 complex subunit sigma-3B) (Adaptor-related protein complex 3 subunit sigma-2) (Sigma-3B-adaptin) (Sigma3B-adaptin) (Sigma-adaptin 3b)	Ap3s2	0.122559	-0.0967603	0.750956	-0.0250962	0.564103	-0.0607238
				B2RUJ5	APBA1_MOUSE	Amyloid-beta A4 precursor protein-binding family A member 1 (Adapter protein X11alpha) (Neuron-specific X11 protein) (Neuronal Munc18-1-interacting protein 1) (Mint-1)	Apba1	0.0363781	-0.170891	0.154058	0.151623	0.0623813	0.0812483
				Q9QXJ1	APBB1_MOUSE	Amyloid-beta A4 precursor protein-binding family B member 1 (Protein Fe65)	Apbb1	0.106527	-0.142569	0.581312	0.100382	0.375183	0.0896442
				Q61315	APC_MOUSE	Adenomatous polyposis coli protein (Protein APC) (mAPC)	Apc	0.16217	-0.0842428	0.130664	0.27137	0.286531	0.141851
				Q8R146	APEH_MOUSE	Acylamino-acid-releasing enzyme (AARE) (EC 3.4.19.1) (Acyl-peptide hydrolase) (APH) (Acylaminoacyl-peptidase)	Apeh	0.967486	-0.0012641	0.814419	0.0100617	0.909791	0.00982308
				P28352	APEX1_MOUSE	DNA-(apurinic or apyrimidinic site) endonuclease (EC 3.1.-.-) (APEX nuclease) (APEN) (Apurinic-apyrimidinic endonuclease 1) (AP endonuclease 1) (REF-1) (Redox factor-1) [Cleaved into: DNA-(apurinic or apyrimidinic site) endonuclease, mitochondrial]	Apex1	0.0494517	-0.139784	0.862057	0.0217068	0.482297	0.0586445
				O35841	API5_MOUSE	Apoptosis inhibitor 5 (API-5) (AAC-11)	Api5	0.363955	-0.0412579	0.872601	0.0162995	0.470702	0.05849
				Q03157	APLP1_MOUSE	Amyloid-like protein 1 (APLP) (APLP-1) [Cleaved into: C30]	Aplp1	0.0579456	0.120386	0.898613	-0.0111401	0.28159	-0.0485427
				Q9D7N9	APMAP_MOUSE	Adipocyte plasma membrane-associated protein (Protein DD16)	Apmap	0.990477	-0.0003407	0.908026	-0.00648713	0.72655	-0.0165069
	+		FN_FC	Q00623	APOA1_MOUSE	Apolipoprotein A-I (Apo-AI) (ApoA-I) (Apolipoprotein A1) [Cleaved into: Proapolipoprotein A-I (ProapoA-I); Truncated apolipoprotein A-I]	Apoa1	0.124181	-0.0710869	5.39075e-06	-0.691135	0.00108626	-0.226777
				Q8K4Z3	NNRE_MOUSE	NAD(P)H-hydrate epimerase (EC 5.1.99.6) (Apolipoprotein A-I-binding protein) (AI-BP) (NAD(P)HX epimerase)	Apoa1bp	0.124653	0.0657377	0.187227	-0.0442166	0.0679021	-0.042644
	+		FN_FC	P09813	APOA2_MOUSE	Apolipoprotein A-II (Apo-AII) (ApoA-II) (Apolipoprotein A2) [Cleaved into: Proapolipoprotein A-II (ProapoA-II)]	Apoa2	0.0761148	0.104852	0.000120197	-0.425771	0.00254716	-0.287865
+			MC_FC	P06728	APOA4_MOUSE	Apolipoprotein A-IV (Apo-AIV) (ApoA-IV) (Apolipoprotein A4)	Apoa4	0.00775362	0.451928	0.862057	-0.0555708	0.267102	-0.190511
				E9Q414	APOB_MOUSE	Apolipoprotein B-100 (Apo B-100) [Cleaved into: Apolipoprotein B-48 (Apo B-48)]	Apob	0.041128	0.278302	0.814817	-0.108574	0.0733528	0.228711
				P51910	APOD_MOUSE	Apolipoprotein D (Apo-D) (ApoD)	Apod	0.445231	0.0371854	0.118034	-0.252621	0.0634719	-0.0868073
				P08226	APOE_MOUSE	Apolipoprotein E (Apo-E)	Apoe	0.0265625	-0.147825	0.00116339	-0.157235	0.558209	-0.0189219
				Q9DCZ4	MIC26_MOUSE	MICOS complex subunit Mic26 (Apolipoprotein O) (MICOS complex subunit Mic23) (Protein FAM121B)	Apoo	0.068959	0.106175	0.00514064	-0.169656	0.0238362	-0.066442
				Q78IK4	MIC27_MOUSE	MICOS complex subunit Mic27 (Apolipoprotein O-like) (Protein FAM121A)	Apool	0.0683019	0.0992436	0.878407	-0.010138	0.267474	-0.0503664
				P12023	A4_MOUSE	Amyloid-beta A4 protein (ABPP) (APP) (Alzheimer disease amyloid A4 protein homolog) (Amyloid precursor protein) (Amyloid-beta precursor protein) (Amyloidogenic glycoprotein) (AG) [Cleaved into: N-APP; Soluble APP-alpha (S-APP-alpha); Soluble APP-beta (S-APP-beta); C99 (APP-C99) (Beta-secretase C-terminal fragment) (Beta-CTF); Amyloid-beta protein 42 (Abeta42) (Beta-APP42); Amyloid-beta protein 40…	App	0.762054	-0.00781345	0.0127168	-0.0806208	0.846262	-0.00465417
				Q8K3H0	DP13A_MOUSE	DCC-interacting protein 13-alpha (Dip13-alpha) (Adapter protein containing PH domain, PTB domain and leucine zipper motif 1)	Appl1	0.730541	-0.0120142	0.832211	-0.0203824	0.378732	-0.0482473
				Q8K3G9	DP13B_MOUSE	DCC-interacting protein 13-beta (Dip13-beta) (Adapter protein containing PH domain, PTB domain and leucine zipper motif 2)	Appl2	0.0435261	0.195721	0.948845	-0.00996256	0.726652	-0.0499201
				P55088	AQP4_MOUSE	Aquaporin-4 (AQP-4) (Mercurial-insensitive water channel) (MIWC) (WCH4)	Aqp4	0.0234242	-0.16326	0.000346307	0.270027	0.00136822	0.265639
				P04627	ARAF_MOUSE	Serine/threonine-protein kinase A-Raf (EC 2.7.11.1) (Proto-oncogene A-Raf)	Araf	0.0643987	-0.139989	0.38276	0.0900283	0.685741	0.0345464
				Q5XJY5	COPD_MOUSE	Coatomer subunit delta (Archain) (Delta-coat protein) (Delta-COP)	Arcn1	0.0971914	0.110197	0.908632	0.0149555	0.0623813	-0.0937407
				P84078	ARF1_MOUSE	ADP-ribosylation factor 1	Arf1	0.0465892	-0.109933	0.178092	-0.019423	0.79016	0.00378847
				P61750	ARF4_MOUSE	ADP-ribosylation factor 4	Arf4	0.71872	0.0114424	0.773762	0.0230663	0.492614	-0.0609412
				P84084	ARF5_MOUSE	ADP-ribosylation factor 5	Arf5	0.630515	-0.0171418	0.869752	-0.0138195	0.814926	0.0136402
				P62331	ARF6_MOUSE	ADP-ribosylation factor 6	Arf6	0.152473	-0.0650377	0.997857	0.000226259	0.311756	-0.0349634
				Q9EPJ9	ARFG1_MOUSE	ADP-ribosylation factor GTPase-activating protein 1 (ARF GAP 1) (ADP-ribosylation factor 1 GTPase-activating protein) (ARF1 GAP) (ARF1-directed GTPase-activating protein)	Arfgap1	0.0224914	-0.154334	0.000300921	0.154112	0.00190388	0.151006
				Q99K28	ARFG2_MOUSE	ADP-ribosylation factor GTPase-activating protein 2 (ARF GAP 2) (GTPase-activating protein ZNF289) (Zinc finger protein 289)	Arfgap2	0.951394	0.00205016	0.819445	-0.0235796	0.670218	-0.0424833
				G3X9K3	BIG1_MOUSE	Brefeldin A-inhibited guanine nucleotide-exchange protein 1 (BIG1) (Brefeldin A-inhibited GEP 1) (ADP-ribosylation factor guanine nucleotide-exchange factor 1)	Arfgef1	0.118666	0.0795932	0.437206	-0.0469439	0.395263	0.0244818
				A2A5R2	BIG2_MOUSE	Brefeldin A-inhibited guanine nucleotide-exchange protein 2 (Brefeldin A-inhibited GEP 2) (ADP-ribosylation factor guanine nucleotide-exchange factor 2)	Arfgef2	0.403483	0.0323365	0.613864	0.0363264	0.00644983	0.139096
				Q3UGY8	BIG3_MOUSE	Brefeldin A-inhibited guanine nucleotide-exchange protein 3 (ARFGEF family member 3)	Arfgef3	0.041671	-0.131598	0.00360553	0.145479	0.553871	0.0279024
				Q8K221	ARFP2_MOUSE	Arfaptin-2 (ADP-ribosylation factor-interacting protein 2)	Arfip2	0.63669	-0.0198655	0.727317	0.0333178	0.763277	0.038986
				Q3UL36	ARGL1_MOUSE	Arginine and glutamate-rich protein 1	Arglu1	0.07613	-0.0973957	0.0315239	0.077297	0.0137203	0.164066
				Q5FWK3	RHG01_MOUSE	Rho GTPase-activating protein 1 (Rho-type GTPase-activating protein 1)	Arhgap1	0.0102452	-0.223827	0.00486498	0.166366	0.000882743	0.179665
				Q69ZH9	RHG23_MOUSE	Rho GTPase-activating protein 23 (Rho-type GTPase-activating protein 23)	Arhgap23	0.364518	-0.0390611	0.614793	0.0350215	0.129366	0.0877726
				Q6ZQ82	RHG26_MOUSE	Rho GTPase-activating protein 26 (Rho-type GTPase-activating protein 26)	Arhgap26	0.139129	-0.0769143	0.446834	-0.0415046	0.873157	-0.0148723
				Q811P8	RHG32_MOUSE	Rho GTPase-activating protein 32 (Brain-specific Rho GTPase-activating protein) (GAB-associated Cdc42/Rac GTPase-activating protein) (GC-GAP) (Rho-type GTPase-activating protein 32) (Rho/Cdc42/Rac GTPase-activating protein RICS) (RhoGAP involved in the beta-catenin-N-cadherin and NMDA receptor signaling) (p200RhoGAP) (p250GAP)	Arhgap32	0.533357	-0.0290968	0.657784	0.0623569	0.810866	0.0312676
				Q91YM2	RHG35_MOUSE	Rho GTPase-activating protein 35 (Glucocorticoid receptor DNA-binding factor 1)	Arhgap35	0.741316	-0.00917053	0.833989	0.00768495	0.782381	-0.0116339
				Q5SSM3	RHG44_MOUSE	Rho GTPase-activating protein 44 (Rho-type GTPase-activating protein RICH2) (RhoGAP interacting with CIP4 homologs protein 2) (RICH-2)	Arhgap44	0.955163	0.00169086	0.594664	-0.0382068	0.165075	-0.0617721
				P97393	RHG05_MOUSE	Rho GTPase-activating protein 5 (Rho-type GTPase-activating protein 5) (p190-B)	Arhgap5	0.0778259	0.0916164	0.426428	-0.0239441	0.0815526	-0.091994
				Q99PT1	GDIR1_MOUSE	Rho GDP-dissociation inhibitor 1 (Rho GDI 1) (GDI-1) (Rho-GDI alpha)	Arhgdia	0.789996	-0.00681925	0.0847958	0.037272	0.409909	0.0163832
				Q8C033	ARHGA_MOUSE	Rho guanine nucleotide exchange factor 10	Arhgef10	0.0306893	0.194559	0.0785412	-0.243768	0.25563	-0.243931
				Q60875	ARHG2_MOUSE	Rho guanine nucleotide exchange factor 2 (Guanine nucleotide exchange factor H1) (GEF-H1) (LBC'S first cousin) (Lymphoid blast crisis-like 1) (Oncogene LFC) (Rhobin)	Arhgef2	0.031731	0.253138	0.325917	-0.0872381	0.908974	0.0250623
				Q9ES28	ARHG7_MOUSE	Rho guanine nucleotide exchange factor 7 (Beta-Pix) (PAK-interacting exchange factor beta) (p85SPR)	Arhgef7	0.116812	-0.0877512	0.647365	0.055042	0.268279	0.0680592
				Q3UTH8	ARHG9_MOUSE	Rho guanine nucleotide exchange factor 9 (Collybistin) (Rac/Cdc42 guanine nucleotide exchange factor 9)	Arhgef9	0.758854	0.013135	0.651255	-0.0953298	0.735991	-0.0586133
				Q9Z1N7	ARI3B_MOUSE	AT-rich interactive domain-containing protein 3B (ARID domain-containing protein 3B) (Bright and dead ringer protein) (Bright-like protein)	Arid3b	0.0328706	-0.152412	0.00880237	0.10538	0.0705821	0.115674
				Q9Z1K5	ARI1_MOUSE	E3 ubiquitin-protein ligase ARIH1 (EC 2.3.2.31) (Protein ariadne-1 homolog) (ARI-1) (RING-type E3 ubiquitin transferase ARIH1) (UbcH7-binding protein) (UbcM4-interacting protein 77) (Ubiquitin-conjugating enzyme E2-binding protein 1)	Arih1	0.119534	0.103978	0.998064	-0.000269175	0.909791	-0.0146461
				Q9Z1K6	ARI2_MOUSE	E3 ubiquitin-protein ligase ARIH2 (ARI-2) (Protein ariadne-2 homolog) (EC 2.3.2.31) (RING-type E3 ubiquitin transferase ARIH2) (Triad1 protein) (UbcM4-interacting protein 48)	Arih2	0.828112	0.0114994	0.110066	0.300194	0.93243	-0.0176516
				Q9D0J4	ARL2_MOUSE	ADP-ribosylation factor-like protein 2	Arl2	0.0311907	0.167847	0.216798	-0.0697944	0.104963	-0.0967333
				Q9WUL7	ARL3_MOUSE	ADP-ribosylation factor-like protein 3	Arl3	0.742575	0.0102434	0.708168	0.0185719	0.261114	-0.0451877
				O88848	ARL6_MOUSE	ADP-ribosylation factor-like protein 6	Arl6	0.557903	-0.0229347	0.0747677	0.0815244	0.883155	-0.0186789
				Q9JKW0	AR6P1_MOUSE	ADP-ribosylation factor-like protein 6-interacting protein 1 (ARL-6-interacting protein 1) (Aip-1) (Protein TBX2)	Arl6ip1	0.599679	-0.0209692	0.991649	0.00129294	0.879479	0.0177431
				Q8R5J9	PRAF3_MOUSE	PRA1 family protein 3 (ADP-ribosylation factor-like protein 6-interacting protein 5) (ARL-6-interacting protein 5) (Aip-5) (Addicsin) (GTRAP3-18) (Glutamate transporter EAAC1-interacting protein) (Prenylated Rab acceptor protein 2) (Protein JWa)	Arl6ip5	0.183553	-0.069226	0.261649	0.0882139	0.0530708	0.121137
				Q8VEH3	ARL8A_MOUSE	ADP-ribosylation factor-like protein 8A (ADP-ribosylation factor-like protein 10B) (Novel small G protein indispensable for equal chromosome segregation 2)	Arl8a	0.335711	-0.040956	0.141704	0.117547	0.150383	0.074429
				Q9CQW2	ARL8B_MOUSE	ADP-ribosylation factor-like protein 8B (ADP-ribosylation factor-like protein 10C) (Novel small G protein indispensable for equal chromosome segregation 1)	Arl8b	0.0335487	-0.162736	0.909578	0.0105913	0.0545916	0.104426
				Q9D7A8	ARMC1_MOUSE	Armadillo repeat-containing protein 1	Armc1	0.0936806	0.0957103	0.0432493	-0.150544	0.0621738	-0.152373
				Q9D0L7	ARM10_MOUSE	Armadillo repeat-containing protein 10	Armc10	0.018083	-0.209325	0.016583	0.103745	0.086769	0.140885
				Q8BNU0	ARMC6_MOUSE	Armadillo repeat-containing protein 6	Armc6	0.852031	0.0050931	0.321427	0.0146556	0.647308	0.0179901
				Q9DBR3	ARMC8_MOUSE	Armadillo repeat-containing protein 8	Armc8	0.0578947	-0.153211	0.54338	-0.0879517	0.790969	0.0295427
				Q8BHS6	ARMX3_MOUSE	Armadillo repeat-containing X-linked protein 3	Armcx3	0.200058	-0.232851	0.890638	-0.0990791	0.556862	0.5324
				A6H630	ARMT1_MOUSE	Damage-control phosphatase ARMT1 (EC 3.1.3.-) (Acidic residue methyltransferase 1) (Protein-glutamate O-methyltransferase) (EC 2.1.1.-) (Sugar phosphate phosphatase ARMT1)	Armt1	0.815802	0.00876069	0.881298	-0.0114818	0.801781	-0.0282609
				Q9R0Q6	ARC1A_MOUSE	Actin-related protein 2/3 complex subunit 1A (SOP2-like protein) (Sid 329)	Arpc1a	0.0289039	-0.146438	0.905528	0.00491142	0.0201704	0.0521011
				Q9CVB6	ARPC2_MOUSE	Actin-related protein 2/3 complex subunit 2 (Arp2/3 complex 34 kDa subunit) (p34-ARC)	Arpc2	0.104571	-0.0853443	0.152363	0.0650463	0.0123489	0.0856137
				Q9JM76	ARPC3_MOUSE	Actin-related protein 2/3 complex subunit 3 (Arp2/3 complex 21 kDa subunit) (p21-ARC)	Arpc3	0.0491467	-0.114256	0.00915583	0.0736845	0.126849	0.0496366
				P59999	ARPC4_MOUSE	Actin-related protein 2/3 complex subunit 4 (Arp2/3 complex 20 kDa subunit) (p20-ARC)	Arpc4	0.0553752	-0.126758	0.842346	0.013015	0.22855	0.0667703
				Q9CPW4	ARPC5_MOUSE	Actin-related protein 2/3 complex subunit 5 (Arp2/3 complex 16 kDa subunit) (p16-ARC)	Arpc5	0.369452	-0.0364654	0.400627	0.0595131	0.32588	0.106106
				Q9D898	ARP5L_MOUSE	Actin-related protein 2/3 complex subunit 5-like protein (Arp2/3 complex 16 kDa subunit 2) (ARC16-2)	Arpc5l	0.0490877	-0.126533	0.307363	0.0525491	0.00777843	0.0895743
				P56212	ARP19_MOUSE	cAMP-regulated phosphoprotein 19 (ARPP-19)	Arpp19	0.0874336	0.137838	0.785312	0.0514262	0.225287	0.102206
	+	+	FN_FC;MN_MC	Q9DCB4	ARP21_MOUSE	cAMP-regulated phosphoprotein 21 (ARPP-21) (Regulator of calmodulin signaling) (Thymocyte cAMP-regulated phosphoprotein)	Arpp21	0.0606106	0.241466	0.0193447	0.683264	0.00567533	0.881295
				Q8BWG8	ARRB1_MOUSE	Beta-arrestin-1 (Arrestin beta-1)	Arrb1	0.0441474	-0.120241	0.094907	0.0650995	0.0376864	0.0586545
				P50429	ARSB_MOUSE	Arylsulfatase B (ASB) (EC 3.1.6.12) (N-acetylgalactosamine-4-sulfatase) (G4S)	Arsb	0.477056	-0.0270729	0.054568	0.139557	0.311023	0.0568006
				P98203	ARVC_MOUSE	Armadillo repeat protein deleted in velo-cardio-facial syndrome homolog	Arvcf	0.0211438	-0.254259	0.064692	0.248841	0.693495	0.0557454
				Q91WU5	AS3MT_MOUSE	Arsenite methyltransferase (EC 2.1.1.137) (Methylarsonite methyltransferase) (S-adenosyl-L-methionine:arsenic(III) methyltransferase)	As3mt	0.143841	-0.0731997	0.00253939	0.255748	0.776368	-0.0159144
				Q9WV54	ASAH1_MOUSE	Acid ceramidase (AC) (ACDase) (Acid CDase) (EC 3.5.1.23) (Acylsphingosine deacylase) (N-acylethanolamine hydrolase ASAH1) (EC 3.5.1.-) (N-acylsphingosine amidohydrolase) [Cleaved into: Acid ceramidase subunit alpha; Acid ceramidase subunit beta]	Asah1	0.26621	0.048707	0.15547	-0.0929053	0.0437589	-0.095504
				Q9QWY8	ASAP1_MOUSE	Arf-GAP with SH3 domain, ANK repeat and PH domain-containing protein 1 (130 kDa phosphatidylinositol 4,5-bisphosphate-dependent ARF1 GTPase-activating protein) (ADP-ribosylation factor-directed GTPase-activating protein 1) (ARF GTPase-activating protein 1) (Development and differentiation-enhancing factor 1) (DEF-1) (Differentiation-enhancing factor 1) (PIP2-dependent ARF1 GAP)	Asap1	0.214106	-0.0651426	0.305551	-0.107221	0.414479	0.058157
				Q7SIG6	ASAP2_MOUSE	Arf-GAP with SH3 domain, ANK repeat and PH domain-containing protein 2 (Development and differentiation-enhancing factor 2) (Paxillin-associated protein with ARF GAP activity 3) (PAG3) (Pyk2 C-terminus-associated protein) (PAP)	Asap2	0.468069	0.0462105	0.291741	-0.17482	0.343252	-0.176141
				Q6NXK8	ASIC1_MOUSE	Acid-sensing ion channel 1 (ASIC1) (Acid-sensing ion channel) (Amiloride-sensitive cation channel 2, neuronal) (Brain sodium channel 2) (BNaC2)	Asic1	0.211601	-0.080734	0.1606	0.164303	0.670677	0.0589817
				Q91YI0	ARLY_MOUSE	Argininosuccinate lyase (ASAL) (EC 4.3.2.1) (Arginosuccinase)	Asl	0.788466	-0.00817728	0.017755	0.102151	0.285057	0.0621557
				O54984	GET3_MOUSE	ATPase GET3 (EC 3.6.-.-) (Arsenical pump-driving ATPase) (Arsenite-stimulated ATPase) (Guided entry of tail-anchored proteins factor 3, ATPase)	Asna1	0.197271	0.067451	0.921921	-0.0101631	0.343392	-0.0692751
				Q61024	ASNS_MOUSE	Asparagine synthetase [glutamine-hydrolyzing] (EC 6.3.5.4) (Glutamine-dependent asparagine synthetase)	Asns	0.0487241	-0.112583	0.0306958	0.0441451	0.0144939	0.0815575
+			MC_FC	Q8R3P0	ACY2_MOUSE	Aspartoacylase (EC 3.5.1.15) (Aminoacylase-2) (ACY-2)	Aspa	0.00243478	0.441117	0.000357252	-0.186814	0.00321286	-0.141358
+			MC_FC	Q8BSY0	ASPH_MOUSE	Aspartyl/asparaginyl beta-hydroxylase (EC 1.14.11.16) (Aspartate beta-hydroxylase) (ASP beta-hydroxylase) (Peptide-aspartate beta-dioxygenase)	Asph	0.01082	0.252999	0.633389	-0.0663402	0.0340739	-0.237397
				Q8C0M9	ASGL1_MOUSE	Isoaspartyl peptidase/L-asparaginase (EC 3.4.19.5) (EC 3.5.1.1) (Asparaginase-like protein 1) (Beta-aspartyl-peptidase) (Isoaspartyl dipeptidase) (L-asparagine amidohydrolase) [Cleaved into: Isoaspartyl peptidase/L-asparaginase alpha chain; Isoaspartyl peptidase/L-asparaginase beta chain]	Asrgl1	0.687465	0.0105467	0.0232344	0.0406504	0.343351	0.0195985
+			MC_FC	P16460	ASSY_MOUSE	Argininosuccinate synthase (EC 6.3.4.5) (Citrulline--aspartate ligase)	Ass1	0.00533333	-0.339478	0.00294685	0.157133	0.0223198	0.13393
+			MC_FC	Q61137	ASTN1_MOUSE	Astrotactin-1 (Neuronal migration protein GC14)	Astn1	0.0141146	-0.266485	0.213313	0.182198	0.00992007	0.23364
				Q9D5T0	ATAD1_MOUSE	ATPase family AAA domain-containing protein 1 (EC 3.6.1.-) (Thorase)	Atad1	0.0494932	0.119283	0.0633935	-0.0932434	0.216417	-0.0566874
				Q925I1	ATAD3_MOUSE	ATPase family AAA domain-containing protein 3 (AAA-ATPase TOB3)	Atad3	0.132413	0.0724962	0.544514	-0.0241926	0.369307	-0.0388579
				Q8K341	ATAT_MOUSE	Alpha-tubulin N-acetyltransferase 1 (Alpha-TAT) (Alpha-TAT1) (TAT) (EC 2.3.1.108) (Acetyltransferase mec-17 homolog)	Atat1	0.218302	-0.0696249	0.584174	0.0471578	0.492123	0.0901525
				Q8BHE3	ATCAY_MOUSE	Caytaxin	Atcay	0.0225679	-0.164221	0.018731	0.138137	0.0974501	0.107586
				Q9Z2A5	ATE1_MOUSE	Arginyl-tRNA--protein transferase 1 (Arginyltransferase 1) (R-transferase 1) (EC 2.3.2.8) (Arginine-tRNA--protein transferase 1)	Ate1	0.0270295	-0.204102	0.522806	0.0396376	0.611867	-0.0492854
				Q80XK6	ATG2B_MOUSE	Autophagy-related protein 2 homolog B	Atg2b	0.396163	-0.0405622	0.64287	-0.0524051	0.38013	-0.0651598
				Q9CPX6	ATG3_MOUSE	Ubiquitin-like-conjugating enzyme ATG3 (EC 2.3.2.-) (Autophagy-related protein 3) (APG3-like)	Atg3	0.456106	0.0305498	0.973974	0.00400591	0.810866	-0.0210028
				Q8BGE6	ATG4B_MOUSE	Cysteine protease ATG4B (EC 3.4.22.-) (AUT-like 1 cysteine endopeptidase) (Autophagin-1) (Autophagy-related cysteine endopeptidase 1) (Autophagy-related protein 4 homolog B)	Atg4b	0.661224	0.0176575	0.996819	-0.000679255	0.969086	-0.00545835
				Q99J83	ATG5_MOUSE	Autophagy protein 5 (APG5-like)	Atg5	0.224239	0.113267	0.746343	-0.0873768	0.725116	-0.0835619
				Q9D906	ATG7_MOUSE	Ubiquitin-like modifier-activating enzyme ATG7 (ATG12-activating enzyme E1 ATG7) (Autophagy-related protein 7) (APG7-like) (mAGP7) (Ubiquitin-activating enzyme E1-like protein)	Atg7	0.0910127	-0.0975749	0.203265	-0.0866041	0.822939	-0.0351646
				Q9CWJ9	PUR9_MOUSE	Bifunctional purine biosynthesis protein ATIC (AICAR transformylase/inosine monophosphate cyclohydrolase) (ATIC) [Includes: Phosphoribosylaminoimidazolecarboxamide formyltransferase (EC 2.1.2.3) (5-aminoimidazole-4-carboxamide ribonucleotide formyltransferase) (AICAR formyltransferase) (AICAR transformylase); IMP cyclohydrolase (EC 3.5.4.10) (IMP synthase) (Inosinicase)]	Atic	0.0508609	-0.103326	0.0012423	0.107758	0.0821531	0.0328126
				Q8BH66	ATLA1_MOUSE	Atlastin-1 (EC 3.6.5.-) (Spastic paraplegia 3A homolog)	Atl1	0.386894	-0.0269494	0.0743075	0.0342021	0.0131539	0.0658841
				Q6PA06	ATLA2_MOUSE	Atlastin-2 (EC 3.6.5.-) (ADP-ribosylation factor-like protein 6-interacting protein 2) (ARL-6-interacting protein 2) (Aip-2)	Atl2	0.532838	0.0205753	0.759841	0.020828	0.816965	-0.0110145
				Q91YH5	ATLA3_MOUSE	Atlastin-3 (EC 3.6.5.-)	Atl3	0.69254	0.0181503	0.286385	-0.159422	0.0806033	-0.237461
				O08997	ATOX1_MOUSE	Copper transport protein ATOX1 (Metal transport protein ATX1)	Atox1	0.161888	0.071362	0.638071	-0.024786	0.689394	0.0258052
				Q9EPE9	AT131_MOUSE	Manganese-transporting ATPase 13A1 (CATP) (EC 7.2.2.-)	Atp13a1	0.144925	-0.0694606	0.898345	0.00929642	0.815597	0.0115669
				Q8VDN2	AT1A1_MOUSE	Sodium/potassium-transporting ATPase subunit alpha-1 (Na(+)/K(+) ATPase alpha-1 subunit) (EC 7.2.2.13) (Sodium pump subunit alpha-1)	Atp1a1	0.250492	-0.0398455	0.0008597	-0.0688343	0.00287295	0.0702376
				Q6PIE5	AT1A2_MOUSE	Sodium/potassium-transporting ATPase subunit alpha-2 (Na(+)/K(+) ATPase alpha-2 subunit) (EC 7.2.2.13) (Na(+)/K(+) ATPase alpha(+) subunit) (Sodium pump subunit alpha-2)	Atp1a2	0.0183345	0.154345	5.27901e-05	-0.19373	0.00235369	-0.0850053
				Q6PIC6	AT1A3_MOUSE	Sodium/potassium-transporting ATPase subunit alpha-3 (Na(+)/K(+) ATPase alpha-3 subunit) (EC 7.2.2.13) (Na(+)/K(+) ATPase alpha(III) subunit) (Sodium pump subunit alpha-3)	Atp1a3	0.0653521	0.0913978	4.83558e-05	-0.140778	0.125096	-0.0149045
				P14094	AT1B1_MOUSE	Sodium/potassium-transporting ATPase subunit beta-1 (Sodium/potassium-dependent ATPase subunit beta-1)	Atp1b1	0.0508052	0.109997	0.00270001	-0.117205	0.713776	-0.0078373
				P14231	AT1B2_MOUSE	Sodium/potassium-transporting ATPase subunit beta-2 (Adhesion molecule in glia) (AMOG) (Sodium/potassium-dependent ATPase subunit beta-2)	Atp1b2	0.00894805	0.226636	0.00063786	-0.160737	0.000730019	-0.142233
				P97370	AT1B3_MOUSE	Sodium/potassium-transporting ATPase subunit beta-3 (Sodium/potassium-dependent ATPase subunit beta-3) (ATPB-3) (CD antigen CD298)	Atp1b3	0.00929114	0.228898	0.00923946	-0.0985193	0.00201501	-0.134685
				O55143	AT2A2_MOUSE	Sarcoplasmic/endoplasmic reticulum calcium ATPase 2 (SERCA2) (SR Ca(2+)-ATPase 2) (EC 7.2.2.10) (Calcium pump 2) (Calcium-transporting ATPase sarcoplasmic reticulum type, slow twitch skeletal muscle isoform) (Endoplasmic reticulum class 1/2 Ca(2+) ATPase)	Atp2a2	0.0378673	0.120452	0.000384519	-0.105605	0.00248223	-0.0694337
				G5E829	AT2B1_MOUSE	Plasma membrane calcium-transporting ATPase 1 (EC 7.2.2.10) (Plasma membrane calcium ATPase isoform 1) (PMCA1) (Plasma membrane calcium pump isoform 1)	Atp2b1	0.0528694	-0.105809	0.000334736	-0.0919356	0.030387	0.0926938
				Q9R0K7	AT2B2_MOUSE	Plasma membrane calcium-transporting ATPase 2 (PMCA2) (EC 7.2.2.10) (Plasma membrane calcium ATPase isoform 2) (Plasma membrane calcium pump isoform 2)	Atp2b2	0.0468884	0.107986	1.48137e-05	-0.240746	0.0499897	-0.0220804
+			MC_FC	Q6Q477	AT2B4_MOUSE	Plasma membrane calcium-transporting ATPase 4 (PMCA4) (EC 7.2.2.10)	Atp2b4	0.00586842	-0.377664	0.927992	0.00674868	0.137302	0.0797126
				Q80XR2	AT2C1_MOUSE	Calcium-transporting ATPase type 2C member 1 (ATPase 2C1) (EC 7.2.2.10) (ATP-dependent Ca(2+) pump PMR1)	Atp2c1	0.0718116	0.160015	0.832739	0.0493453	0.563199	-0.0692377
				Q03265	ATPA_MOUSE	ATP synthase subunit alpha, mitochondrial (ATP synthase F1 subunit alpha)	Atp5a1	0.103166	0.0703936	3.96204e-05	-0.175397	0.00361439	-0.0808864
				P56480	ATPB_MOUSE	ATP synthase subunit beta, mitochondrial (EC 7.1.2.2) (ATP synthase F1 subunit beta)	Atp5b	0.0578115	0.0926542	1.31443e-06	-0.13987	0.00064224	-0.0532207
				Q91VR2	ATPG_MOUSE	ATP synthase subunit gamma, mitochondrial (ATP synthase F1 subunit gamma) (F-ATPase gamma subunit)	Atp5c1	0.124438	0.0659328	0.000180901	-0.199989	0.00317677	-0.104514
				Q9D3D9	ATPD_MOUSE	ATP synthase subunit delta, mitochondrial (ATP synthase F1 subunit delta) (F-ATPase delta subunit)	Atp5d	0.178528	0.061446	0.00318883	-0.192945	0.302813	-0.0800309
				P56382	ATP5E_MOUSE	ATP synthase subunit epsilon, mitochondrial (ATPase subunit epsilon) (ATP synthase F1 subunit epsilon)	Atp5e	0.168974	0.0734875	0.00606562	-0.249908	0.176097	-0.110954
				Q9CQQ7	AT5F1_MOUSE	ATP synthase F(0) complex subunit B1, mitochondrial (ATP synthase peripheral stalk-membrane subunit b) (ATP synthase subunit b) (ATPase subunit b)	Atp5f1	0.0603405	0.0980515	8.87964e-05	-0.146168	0.558886	-0.0184021
				Q9DCX2	ATP5H_MOUSE	ATP synthase subunit d, mitochondrial (ATPase subunit d) (ATP synthase peripheral stalk subunit d)	Atp5h	0.0376685	0.120163	0.000885696	-0.129377	0.00160707	-0.0855489
				Q06185	ATP5I_MOUSE	ATP synthase subunit e, mitochondrial (ATPase subunit e) (ATP synthase membrane subunit e)	Atp5i	0.107382	0.0769038	0.00238351	-0.136528	0.0316083	-0.110898
				P97450	ATP5J_MOUSE	ATP synthase-coupling factor 6, mitochondrial (ATPase subunit F6) (ATP synthase peripheral stalk subunit F6)	Atp5j	0.0480519	0.108111	0.000521267	-0.10996	0.0915593	-0.0288987
				P56135	ATPK_MOUSE	ATP synthase subunit f, mitochondrial (ATP synthase membrane subunit f)	Atp5j2	0.366173	0.0514581	0.345348	-0.144789	0.93243	0.00876164
				Q9CPQ8	ATP5L_MOUSE	ATP synthase subunit g, mitochondrial (ATPase subunit g) (ATP synthase membrane subunit g)	Atp5l	0.0791313	0.0919156	0.00891371	-0.125162	0.869472	0.00598001
				Q9DB20	ATPO_MOUSE	ATP synthase subunit O, mitochondrial (ATP synthase peripheral stalk subunit OSCP) (Oligomycin sensitivity conferral protein) (OSCP)	Atp5o	0.0764671	0.0887041	0.000612134	-0.145364	0.0541365	-0.0606198
				Q9CRA7	ATP5S_MOUSE	ATP synthase subunit s, mitochondrial (ATP synthase-coupling factor B) (Distal membrane arm assembly complex 2-like protein) (Mitochondrial ATP synthase regulatory component factor B)	Atp5s	0.296894	0.0453513	0.328102	-0.066432	0.360816	-0.063431
				Q9CYN9	RENR_MOUSE	Renin receptor (ATPase H(+)-transporting lysosomal accessory protein 2) (ATPase H(+)-transporting lysosomal-interacting protein 2) (Renin/prorenin receptor) [Cleaved into: Renin receptor extracellular fragment; Renin receptor cytoplasmic fragment]	Atp6ap2	0.0454891	-0.1818	0.227799	0.131226	0.709306	-0.0546403
				Q9Z1G4	VPP1_MOUSE	V-type proton ATPase 116 kDa subunit a1 (V-ATPase 116 kDa subunit a1) (Clathrin-coated vesicle/synaptic vesicle proton pump 116 kDa subunit) (Vacuolar adenosine triphosphatase subunit Ac116) (Vacuolar proton pump subunit 1) (Vacuolar proton translocating ATPase 116 kDa subunit a isoform 1)	Atp6v0a1	0.0156772	-0.176623	0.00310511	0.0896978	0.00567533	0.0986338
				P51863	VA0D1_MOUSE	V-type proton ATPase subunit d 1 (V-ATPase subunit d 1) (P39) (Physophilin) (V-ATPase 40 kDa accessory protein) (V-ATPase AC39 subunit) (Vacuolar proton pump subunit d 1)	Atp6v0d1	0.0152261	-0.177917	0.0208507	0.0794401	0.00338927	0.114627
				P50516	VATA_MOUSE	V-type proton ATPase catalytic subunit A (V-ATPase subunit A) (EC 7.1.2.2) (V-ATPase 69 kDa subunit) (Vacuolar proton pump subunit alpha)	Atp6v1a	0.156466	-0.0585055	0.156533	0.0234609	0.0311303	0.0515838
				P62814	VATB2_MOUSE	V-type proton ATPase subunit B, brain isoform (V-ATPase subunit B 2) (Endomembrane proton pump 58 kDa subunit) (Vacuolar proton pump subunit B 2)	Atp6v1b2	0.0892468	-0.0771828	0.14762	0.0204272	0.0117714	0.0548153
				Q9Z1G3	VATC1_MOUSE	V-type proton ATPase subunit C 1 (V-ATPase subunit C 1) (Vacuolar proton pump subunit C 1)	Atp6v1c1	0.0833627	-0.0837746	0.288627	-0.0184793	0.797689	-0.00533247
				P57746	VATD_MOUSE	V-type proton ATPase subunit D (V-ATPase subunit D) (V-ATPase 28 kDa accessory protein) (Vacuolar proton pump subunit D)	Atp6v1d	0.0481622	-0.116801	0.952853	0.00194979	0.293214	0.0293841
				P50518	VATE1_MOUSE	V-type proton ATPase subunit E 1 (V-ATPase subunit E 1) (V-ATPase 31 kDa subunit) (p31) (Vacuolar proton pump subunit E 1)	Atp6v1e1	0.166788	-0.0522976	0.324578	0.0122843	0.0218579	0.0235038
				Q9D1K2	VATF_MOUSE	V-type proton ATPase subunit F (V-ATPase subunit F) (V-ATPase 14 kDa subunit) (Vacuolar proton pump subunit F)	Atp6v1f	0.132905	-0.0658579	0.111473	0.0613279	0.636265	0.0148635
				Q9CR51	VATG1_MOUSE	V-type proton ATPase subunit G 1 (V-ATPase subunit G 1) (V-ATPase 13 kDa subunit 1) (Vacuolar proton pump subunit G 1)	Atp6v1g1	0.927309	-0.00388098	0.998064	-0.000459671	0.921759	0.00875187
				Q9WTT4	VATG2_MOUSE	V-type proton ATPase subunit G 2 (V-ATPase subunit G 2) (V-ATPase 13 kDa subunit 2) (Vacuolar proton pump subunit G 2)	Atp6v1g2	0.0775478	-0.100748	0.753129	0.0137763	0.4871	0.0312583
				Q8BVE3	VATH_MOUSE	V-type proton ATPase subunit H (V-ATPase subunit H) (Vacuolar proton pump subunit H)	Atp6v1h	0.100521	-0.0729413	0.965505	-0.00104809	0.0267448	0.0551882
				P70704	AT8A1_MOUSE	Phospholipid-transporting ATPase IA (EC 7.6.2.1) (ATPase class I type 8A member 1) (Chromaffin granule ATPase II) (P4-ATPase flippase complex alpha subunit ATP8A1)	Atp8a1	0.00969096	-0.225546	0.000994277	0.14987	0.0364939	0.0737662
				P98200	AT8A2_MOUSE	Phospholipid-transporting ATPase IB (EC 7.6.2.1) (ATPase class I type 8A member 2) (P4-ATPase flippase complex alpha subunit ATP8A2)	Atp8a2	0.790714	-0.00860763	0.361747	0.0384665	0.714745	0.022069
				O70228	ATP9A_MOUSE	Probable phospholipid-transporting ATPase IIA (EC 7.6.2.1) (ATPase class II type 9A)	Atp9a	0.0848376	-0.154057	0.750807	0.077219	0.827251	-0.0525031
+			MC_FC	Q811I0	ATPF1_MOUSE	ATP synthase mitochondrial F1 complex assembly factor 1	Atpaf1	0.00680203	0.313262	0.00778267	-0.231747	0.0119775	-0.122098
				O35143	ATIF1_MOUSE	ATPase inhibitor, mitochondrial (ATP synthase F1 subunit epsilon) (Inhibitor of F(1)F(o)-ATPase) (IF(1)) (IF1)	Atpif1	0.870114	0.00556254	0.190479	-0.121169	0.498633	-0.0314028
				P28658	ATX10_MOUSE	Ataxin-10 (Brain protein E46) (Spinocerebellar ataxia type 10 protein homolog)	Atxn10	0.0495209	-0.109389	0.0169966	0.0534945	0.714413	0.00990295
				O70305	ATX2_MOUSE	Ataxin-2 (Spinocerebellar ataxia type 2 protein homolog)	Atxn2	0.0381213	0.139467	0.759989	-0.0111928	0.0723564	-0.109817
				Q7TQH0	ATX2L_MOUSE	Ataxin-2-like protein	Atxn2l	0.384717	0.0400636	0.274339	-0.0495656	0.563433	-0.0719855
				Q9JLZ3	AUHM_MOUSE	Methylglutaconyl-CoA hydratase, mitochondrial (EC 4.2.1.18) (AU-specific RNA-binding enoyl-CoA hydratase) (AU-binding enoyl-CoA hydratase) (muAUH) (Itaconyl-CoA hydratase) (EC 4.2.1.56)	Auh	0.0165792	0.177526	0.000161377	-0.21233	0.00638005	-0.113679
				Q80U56	AVL9_MOUSE	Late secretory pathway protein AVL9 homolog	Avl9	0.258603	-0.059665	0.1895	0.105811	0.0821531	0.170031
				Q3UI43	BABA1_MOUSE	BRISC and BRCA1-A complex member 1 (Mediator of RAP80 interactions and targeting subunit of 40 kDa) (New component of the BRCA1-A complex)	Babam1	0.3021	-0.0503902	0.192957	-0.125358	0.167975	-0.223314
				Q60739	BAG1_MOUSE	BAG family molecular chaperone regulator 1 (BAG-1) (Bcl-2-associated athanogene 1)	Bag1	0.113401	0.116052	0.826108	-0.0389733	0.931408	-0.0119891
				Q91YN9	BAG2_MOUSE	BAG family molecular chaperone regulator 2 (BAG-2) (Bcl-2-associated athanogene 2)	Bag2	0.724934	0.0155232	0.898613	0.0201917	0.689394	-0.064739
+			MC_FC	Q8CI61	BAG4_MOUSE	BAG family molecular chaperone regulator 4 (BAG-4) (Bcl-2-associated athanogene 4) (Silencer of death domains)	Bag4	0.0462933	-0.358369	0.657413	-0.184729	0.931408	-0.0249047
				Q8CI32	BAG5_MOUSE	BAG family molecular chaperone regulator 5 (BAG-5) (Bcl-2-associated athanogene 5)	Bag5	0.193591	-0.0591457	0.912398	0.00807738	0.815831	0.0182037
				Q9Z1R2	BAG6_MOUSE	Large proline-rich protein BAG6 (BAG family molecular chaperone regulator 6) (BCL2-associated athanogene 6) (BAG-6) (HLA-B-associated transcript 3) (Protein Scythe)	Bag6	0.0921626	0.09778	0.134234	0.0932434	0.141342	0.069339
				Q8BKX1	BAIP2_MOUSE	Brain-specific angiogenesis inhibitor 1-associated protein 2 (BAI-associated protein 2) (BAI1-associated protein 2) (Insulin receptor substrate protein of 53 kDa) (IRSp53) (Insulin receptor substrate p53) (Insulin receptor tyrosine kinase 53 kDa substrate)	Baiap2	0.0151738	-0.198933	0.000660232	0.238598	0.000300033	0.473892
+			MC_FC	Q80TT2	BAIP3_MOUSE	BAI1-associated protein 3 (BAP3) (Brain-specific angiogenesis inhibitor I-associated protein 3) (Baiap3)	Baiap3	0.00177778	-0.480465	0.000120366	0.359149	0.0126539	0.146774
+			MC_FC	Q91XV3	BASP1_MOUSE	Brain acid soluble protein 1 (22 kDa neuronal tissue-enriched acidic protein) (Neuronal axonal membrane protein NAP-22)	Basp1	0.00266667	-0.398333	0.000236739	0.149027	0.000538375	0.204074
				Q9R069	BCAM_MOUSE	Basal cell adhesion molecule (B-CAM cell surface glycoprotein) (Lutheran antigen) (CD antigen CD239)	Bcam	0.0833827	0.110047	0.246574	-0.0668023	0.305628	-0.0654197
				Q61361	PGCB_MOUSE	Brevican core protein	Bcan	0.132408	0.062089	0.000128899	-0.170178	0.0357974	-0.0523114
				Q61334	BAP29_MOUSE	B-cell receptor-associated protein 29 (BCR-associated protein 29) (Bap29)	Bcap29	0.593046	-0.0162168	0.305308	0.041054	0.984466	0.00254393
				Q61335	BAP31_MOUSE	B-cell receptor-associated protein 31 (BCR-associated protein 31) (Bap31) (p28)	Bcap31	0.077852	0.0884395	0.47448	0.0215702	0.711178	-0.010253
+			MC_FC	Q80YN3	BCAS1_MOUSE	Breast carcinoma-amplified sequence 1 homolog (Novel amplified in breast cancer 1 homolog)	Bcas1	0.00250746	0.402699	0.973592	0.000667572	0.00597628	-0.074728
				Q8CCN5	BCAS3_MOUSE	Breast carcinoma-amplified sequence 3 homolog (K20D4) (Protein rudhira)	Bcas3	0.0793603	0.106879	0.39595	0.0643184	0.708951	-0.0219138
				P24288	BCAT1_MOUSE	Branched-chain-amino-acid aminotransferase, cytosolic (BCAT(c)) (EC 2.6.1.42) (Protein ECA39)	Bcat1	0.0191424	0.165021	0.0301191	-0.095655	0.00219037	-0.179949
				O35855	BCAT2_MOUSE	Branched-chain-amino-acid aminotransferase, mitochondrial (BCAT(m)) (EC 2.6.1.42)	Bcat2	0.0630287	0.231609	0.998064	0.00136733	0.130398	-0.19105
				P50136	ODBA_MOUSE	2-oxoisovalerate dehydrogenase subunit alpha, mitochondrial (EC 1.2.4.4) (Branched-chain alpha-keto acid dehydrogenase E1 component alpha chain) (BCKDE1A) (BCKDH E1-alpha)	Bckdha	0.13795	0.0739238	0.898613	-0.00944281	0.223169	-0.0968719
				Q6P3A8	ODBB_MOUSE	2-oxoisovalerate dehydrogenase subunit beta, mitochondrial (EC 1.2.4.4) (Branched-chain alpha-keto acid dehydrogenase E1 component beta chain) (BCKDE1B) (BCKDH E1-beta)	Bckdhb	0.314251	0.0389056	0.331719	-0.0399208	0.468931	-0.068275
				Q64373	B2CL1_MOUSE	Bcl-2-like protein 1 (Bcl2-L-1) (Apoptosis regulator Bcl-X)	Bcl2l1	0.0402144	-0.267683	0.713601	-0.102856	0.334386	0.0947988
				P59017	B2L13_MOUSE	Bcl-2-like protein 13 (Bcl2-L-13) (Bcl-rambo) (Protein Mil1)	Bcl2l13	0.824673	-0.00734925	0.980156	0.00254202	0.873661	0.0140731
				P70345	B2CL2_MOUSE	Bcl-2-like protein 2 (Bcl2-L-2) (Apoptosis regulator Bcl-W) (c98)	Bcl2l2	0.0560429	0.134723	0.493464	-0.0700028	0.99769	0.000576019
				Q8K019	BCLF1_MOUSE	Bcl-2-associated transcription factor 1 (Btf)	Bclaf1	0.812826	-0.00931597	0.940696	0.0171499	0.609268	-0.0560575
				Q6PAJ1	BCR_MOUSE	Breakpoint cluster region protein (EC 2.7.11.1)	Bcr	0.180711	-0.0702841	0.017755	0.176426	0.221094	0.109886
				Q9CZP5	BCS1_MOUSE	Mitochondrial chaperone BCS1 (BCS1-like protein)	Bcs1l	0.110911	-0.0747917	0.825864	0.0111666	0.176097	0.0469127
				Q80XN0	BDH_MOUSE	D-beta-hydroxybutyrate dehydrogenase, mitochondrial (EC 1.1.1.30) (3-hydroxybutyrate dehydrogenase) (BDH)	Bdh1	0.0104747	0.204243	0.000138828	-0.181546	0.0572384	-0.0562143
				O88597	BECN1_MOUSE	Beclin-1 (Coiled-coil myosin-like BCL2-interacting protein) [Cleaved into: Beclin-1-C 35 kDa; Beclin-1-C 37 kDa]	Becn1	0.0632706	0.136835	0.0214741	0.230623	0.163784	0.172076
				Q68EF6	BEGIN_MOUSE	Brain-enriched guanylate kinase-associated protein	Begain	0.0263608	-0.254703	0.281774	0.132791	0.29155	0.149065
				P70444	BID_MOUSE	BH3-interacting domain death agonist (p22 BID) (BID) [Cleaved into: BH3-interacting domain death agonist p15 (p15 BID); BH3-interacting domain death agonist p13 (p13 BID); BH3-interacting domain death agonist p11 (p11 BID)]	Bid	0.0522026	-0.127318	0.245849	0.0954876	0.430429	0.0489569
				O08539	BIN1_MOUSE	Myc box-dependent-interacting protein 1 (Amphiphysin II) (Amphiphysin-like protein) (Bridging integrator 1) (SH3 domain-containing protein 9)	Bin1	0.126084	0.0647173	0.0022838	-0.100925	0.916325	-0.00170183
				Q8VD62	CK068_MOUSE	UPF0696 protein C11orf68 homolog (Basophilic leukemia-expressed protein Bles03) (Protein WF-3)	Bles03	0.280503	0.0562792	0.76937	-0.0362809	0.306018	-0.112372
				Q8R016	BLMH_MOUSE	Bleomycin hydrolase (BH) (BLM hydrolase) (BMH) (EC 3.4.22.40)	Blmh	0.568497	0.0175066	0.438726	0.0347066	0.790578	-0.00522614
				Q9CY64	BIEA_MOUSE	Biliverdin reductase A (BVR A) (EC 1.3.1.24) (Biliverdin-IX alpha-reductase)	Blvra	0.0147056	0.176285	0.00253939	-0.115647	0.00675828	-0.0735044
				Q923D2	BLVRB_MOUSE	Flavin reductase (NADPH) (FR) (EC 1.5.1.30) (Biliverdin reductase B) (BVR-B) (EC 1.3.1.24) (Biliverdin-IX beta-reductase) (NADPH-dependent diaphorase) (NADPH-flavin reductase) (FLR)	Blvrb	0.316143	-0.0442777	0.125852	-0.0971453	0.383907	-0.0653136
				Q6QD59	SEC20_MOUSE	Vesicle transport protein SEC20	Bnip1	0.617071	-0.0149541	0.266653	-0.0197897	0.783448	0.0151405
				Q8BGS2	BOLA2_MOUSE	BolA-like protein 2	Bola2	0.264136	0.0803981	0.488881	-0.0765896	0.369433	-0.20485
				P15327	PMGE_MOUSE	Bisphosphoglycerate mutase (BPGM) (EC 5.4.2.4) (2,3-bisphosphoglycerate mutase, erythrocyte) (2,3-bisphosphoglycerate synthase) (EC 5.4.2.11) (BPG-dependent PGAM)	Bpgm	0.379517	0.0435748	0.107367	-0.211489	0.0245946	-0.198833
				Q8R164	BPHL_MOUSE	Valacyclovir hydrolase (VACVase) (Valacyclovirase) (EC 3.1.-.-) (Biphenyl hydrolase-like protein)	Bphl	0.154214	0.0548615	0.00020969	-0.19813	0.0121519	-0.0721607
				Q9Z0S1	BPNT1_MOUSE	3'(2'),5'-bisphosphate nucleotidase 1 (EC 3.1.3.7) (Bisphosphate 3'-nucleotidase 1) (PAP-inositol 1,4-phosphatase) (PIP)	Bpnt1	0.566675	-0.0175943	0.0728052	-0.0594368	0.313299	0.0278077
				P28028	BRAF_MOUSE	Serine/threonine-protein kinase B-raf (EC 2.7.11.1) (Proto-oncogene B-Raf)	Braf	0.306563	-0.0426044	0.903115	0.00727296	0.448546	0.0438688
				P97929	BRCA2_MOUSE	Breast cancer type 2 susceptibility protein homolog (Fanconi anemia group D1 protein homolog)	Brca2	0.929673	0.00325847	0.986815	-0.00247312	0.239717	-0.111341
				Q8K3W0	BABA2_MOUSE	BRISC and BRCA1-A complex member 2 (BRCA1-A complex subunit BRE) (BRCA1/BRCA2-containing complex subunit 45) (Brain and reproductive organ-expressed protein)	Bre	0.0486069	0.145041	0.549159	0.0452409	0.926169	-0.00567293
				Q8BXV2	BRI3B_MOUSE	BRI3-binding protein (I3-binding protein)	Bri3bp	0.44928	0.0319719	0.896097	-0.0121207	0.812414	-0.0192099
				Q91VR8	BRK1_MOUSE	Protein BRICK1 (BRK1)	Brk1	0.473963	-0.0314727	0.116754	0.14452	0.944284	0.00792789
				Q8K2Q7	BROX_MOUSE	BRO1 domain-containing protein BROX (BRO1 domain- and CAAX motif-containing protein)	Brox	0.0728136	0.0936954	0.973592	0.00218654	0.367615	-0.0313408
				Q5RJI5	BRSK1_MOUSE	Serine/threonine-protein kinase BRSK1 (EC 2.7.11.1) (EC 2.7.11.26) (Brain-specific serine/threonine-protein kinase 1) (BR serine/threonine-protein kinase 1) (Serine/threonine-protein kinase SAD-B)	Brsk1	0.147439	0.0669539	0.504992	-0.0320394	0.846262	0.00778317
				Q69Z98	BRSK2_MOUSE	Serine/threonine-protein kinase BRSK2 (EC 2.7.11.1) (EC 2.7.11.26) (Brain-specific serine/threonine-protein kinase 2) (BR serine/threonine-protein kinase 2) (Serine/threonine-protein kinase SAD-A)	Brsk2	0.235231	0.053195	0.650656	0.0245359	0.72655	0.0259628
				P18572	BASI_MOUSE	Basigin (Basic immunoglobulin superfamily) (HT7 antigen) (Membrane glycoprotein gp42) (CD antigen CD147)	Bsg	0.0225116	0.159625	0.0124632	-0.0891895	0.192048	-0.0452056
				O88737	BSN_MOUSE	Protein bassoon	Bsn	0.110695	-0.0717072	0.0168513	0.0499477	0.0126539	0.0705018
	+		FN_FC	Q9DB72	BTBDH_MOUSE	BTB/POZ domain-containing protein 17 (Galectin-3-binding protein-like)	Btbd17	0.0266762	0.168931	0.00107103	-0.519344	0.311881	-0.0930634
				Q64152	BTF3_MOUSE	Transcription factor BTF3 (Nascent polypeptide-associated complex subunit beta) (NAC-beta) (RNA polymerase B transcription factor 3)	Btf3	0.732947	-0.0188148	0.920471	0.0296085	0.74467	-0.0445309
				Q9CQH7	BT3L4_MOUSE	Transcription factor BTF3 homolog 4 (Basic transcription factor 3-like 4)	Btf3l4	0.030534	0.145344	0.97532	0.00182366	0.0169994	-0.197316
				Q9WVA3	BUB3_MOUSE	Mitotic checkpoint protein BUB3 (WD repeat type I transmembrane protein A72.5)	Bub3	0.535057	-0.0298169	0.635164	-0.0654769	0.328938	-0.147025
				Q9CQC6	BZW1_MOUSE	Basic leucine zipper and W2 domain-containing protein 1	Bzw1	0.0535223	0.112662	0.0232344	-0.137067	0.00190388	-0.116161
+			MC_FC	Q91VK1	BZW2_MOUSE	Basic leucine zipper and W2 domain-containing protein 2	Bzw2	0.0114882	0.249508	0.878275	0.0176871	0.0565363	-0.149397
				P14106	C1QB_MOUSE	Complement C1q subcomponent subunit B	C1qb	0.0302819	0.166858	0.287106	-0.0868797	0.00485473	-0.142816
				O35658	C1QBP_MOUSE	Complement component 1 Q subcomponent-binding protein, mitochondrial (GC1q-R protein) (Glycoprotein gC1qBP) (C1qBP)	C1qbp	0.10732	0.0773039	0.591226	-0.0280244	0.187043	-0.033618
				Q80X80	C2C2L_MOUSE	Phospholipid transfer protein C2CD2L (C2 domain-containing protein 2-like) (Transmembrane protein 24)	C2cd2l	0.204891	0.05458	0.00912089	0.178373	0.492752	0.0586858
+			MC_FC	P01027	CO3_MOUSE	Complement C3 (HSE-MSF) [Cleaved into: Complement C3 beta chain; C3-beta-c (C3bc); Complement C3 alpha chain; C3a anaphylatoxin; Acylation stimulating protein (ASP) (C3adesArg); Complement C3b alpha' chain; Complement C3c alpha' chain fragment 1; Complement C3dg fragment; Complement C3g fragment; Complement C3d fragment; Complement C3f fragment; Complement C3c alpha' chain fragment 2]	C3	0.00638095	-0.416375	0.114335	-0.298231	0.104963	-0.0912325
	+		FN_FC	P13634	CAH1_MOUSE	Carbonic anhydrase 1 (EC 4.2.1.1) (Carbonate dehydratase I) (Carbonic anhydrase I) (CA-I)	Ca1	0.0447874	-0.133426	0.00235834	-0.606242	0.000537848	-0.431274
				Q9WVT6	CAH14_MOUSE	Carbonic anhydrase 14 (EC 4.2.1.1) (Carbonate dehydratase XIV) (Carbonic anhydrase XIV) (CA-XIV)	Ca14	0.0130288	0.233453	0.699939	0.0350237	0.561983	-0.0233076
+			MC_FC	P00920	CAH2_MOUSE	Carbonic anhydrase 2 (EC 4.2.1.1) (Carbonate dehydratase II) (Carbonic anhydrase II) (CA-II)	Ca2	0.0035	0.368806	0.000106692	-0.240458	6.30573e-05	-0.213254
				Q06138	CAB39_MOUSE	Calcium-binding protein 39 (MO25alpha) (Protein Mo25)	Cab39	0.218441	0.0483203	0.0580934	-0.0443053	0.011807	-0.0814457
				Q9DB16	CB39L_MOUSE	Calcium-binding protein 39-like (MO25beta) (Mo25-like protein)	Cab39l	0.128858	0.16624	0.462759	-0.211505	0.468298	-0.246393
+			MC_FC	P97445	CAC1A_MOUSE	Voltage-dependent P/Q-type calcium channel subunit alpha-1A (Brain calcium channel I) (BI) (Calcium channel, L type, alpha-1 polypeptide isoform 4) (Voltage-gated calcium channel subunit alpha Cav2.1)	Cacna1a	0.0778606	-0.664148	0.77035	-0.425601	0.232904	1.13904
+			MC_FC	Q61290	CAC1E_MOUSE	Voltage-dependent R-type calcium channel subunit alpha-1E (Brain calcium channel II) (BII) (Calcium channel, L type, alpha-1 polypeptide, isoform 6) (Voltage-gated calcium channel subunit alpha Cav2.3)	Cacna1e	0.0125517	-0.403071	0.952541	0.0288939	0.612939	0.0865204
+			MC_FC	O08532	CA2D1_MOUSE	Voltage-dependent calcium channel subunit alpha-2/delta-1 (Voltage-gated calcium channel subunit alpha-2/delta-1) [Cleaved into: Voltage-dependent calcium channel subunit alpha-2-1; Voltage-dependent calcium channel subunit delta-1]	Cacna2d1	0.0021	-0.425555	0.0164261	0.0791984	0.00112028	0.157513
+			MC_FC	Q6PHS9	CA2D2_MOUSE	Voltage-dependent calcium channel subunit alpha-2/delta-2 (Protein ducky) (Voltage-gated calcium channel subunit alpha-2/delta-2) [Cleaved into: Voltage-dependent calcium channel subunit alpha-2-2; Voltage-dependent calcium channel subunit delta-2]	Cacna2d2	0.00842105	-0.273704	0.00109424	0.128355	0.0247558	0.126457
				Q9Z1L5	CA2D3_MOUSE	Voltage-dependent calcium channel subunit alpha-2/delta-3 (Voltage-gated calcium channel subunit alpha-2/delta-3) [Cleaved into: Voltage-dependent calcium channel subunit alpha-2-3; Voltage-dependent calcium channel subunit delta-3]	Cacna2d3	0.0778796	-0.102984	0.00165013	0.255208	0.00325863	0.220888
				Q8R0S4	CACB4_MOUSE	Voltage-dependent L-type calcium channel subunit beta-4 (CAB4) (Calcium channel voltage-dependent subunit beta 4)	Cacnb4	0.0153333	-0.181369	0.041653	0.0469475	0.0868789	0.0905011
				Q8VHW2	CCG8_MOUSE	Voltage-dependent calcium channel gamma-8 subunit (Neuronal voltage-gated calcium channel gamma-8 subunit) (Transmembrane AMPAR regulatory protein gamma-8) (TARP gamma-8)	Cacng8	0.0215355	-0.229638	0.901725	-0.015393	0.58452	0.0656226
				Q9CXW3	CYBP_MOUSE	Calcyclin-binding protein (CacyBP) (Siah-interacting protein)	Cacybp	0.0560856	-0.113705	0.0157534	0.0990243	0.838877	0.010232
+			MC_FC	B2RQC6	PYR1_MOUSE	CAD protein [Includes: Glutamine-dependent carbamoyl-phosphate synthase (EC 6.3.5.5); Aspartate carbamoyltransferase (EC 2.1.3.2); Dihydroorotase (EC 3.5.2.3)]	Cad	0.0182721	0.306871	0.906903	-0.0587478	0.674206	-0.0909548
+			MC_FC	Q8R5M8	CADM1_MOUSE	Cell adhesion molecule 1 (Immunoglobulin superfamily member 4) (IgSF4) (Nectin-like protein 2) (NECL-2) (Spermatogenic immunoglobulin superfamily) (SgIgSF) (Synaptic cell adhesion molecule) (SynCAM) (Tumor suppressor in lung cancer 1) (TSLC-1)	Cadm1	0.00337931	-0.390117	0.000994277	0.190785	0.00876778	0.150161
				Q8BLQ9	CADM2_MOUSE	Cell adhesion molecule 2 (Immunoglobulin superfamily member 4D) (IgSF4D) (Nectin-like protein 3) (NECL-3) (Synaptic cell adhesion molecule 2) (SynCAM 2)	Cadm2	0.0197512	-0.176553	0.640459	-0.0195055	0.00133922	0.184762
				Q99N28	CADM3_MOUSE	Cell adhesion molecule 3 (Immunoglobulin superfamily member 4B) (IgSF4B) (Nectin-like protein 1) (NECL-1) (Synaptic cell adhesion molecule 3) (TSLC1-like protein 1)	Cadm3	0.0524147	-0.109362	0.00117315	0.0829797	0.0289068	0.0937977
				Q8R464	CADM4_MOUSE	Cell adhesion molecule 4 (Immunoglobulin superfamily member 4C) (IgSF4C) (Nectin-like protein 4) (NECL-4) (TSLC1-like protein 2)	Cadm4	0.103229	0.0746646	0.000607736	-0.117484	0.113999	-0.0368977
				Q80TJ1	CAPS1_MOUSE	Calcium-dependent secretion activator 1 (Calcium-dependent activator protein for secretion 1) (CAPS-1)	Cadps	0.123462	0.0659122	0.00212583	-0.0779257	0.00894673	-0.065465
				Q8BYR5	CAPS2_MOUSE	Calcium-dependent secretion activator 2 (Calcium-dependent activator protein for secretion 2) (CAPS-2)	Cadps2	0.0177923	-0.246095	0.0025521	0.278639	0.0950109	0.192104
+			MC_FC	P12658	CALB1_MOUSE	Calbindin (Calbindin D28) (D-28K) (PCD-29) (Spot 35 protein) (Vitamin D-dependent calcium-binding protein, avian-type)	Calb1	0	-0.646339	0.000157994	0.303408	0.00136822	0.335849
+			MC_FC	Q08331	CALB2_MOUSE	Calretinin (CR)	Calb2	0.00151351	-0.515217	0.000180901	0.144765	0.000517214	0.185418
				Q8CGU1	CACO1_MOUSE	Calcium-binding and coiled-coil domain-containing protein 1 (Coiled-coil coactivator protein)	Calcoco1	0.300458	0.0421779	0.696025	0.0205522	0.0426534	0.143794
				P14211	CALR_MOUSE	Calreticulin (CRP55) (Calregulin) (Endoplasmic reticulum resident protein 60) (ERp60) (HACBP)	Calr	0.513199	-0.0197234	0.41322	-0.0226579	0.831932	-0.00434542
				O35887	CALU_MOUSE	Calumenin (Crocalbin)	Calu	0.633712	0.0145528	0.0103565	0.124579	0.221276	-0.0403814
				Q91YS8	KCC1A_MOUSE	Calcium/calmodulin-dependent protein kinase type 1 (EC 2.7.11.17) (CaM kinase I) (CaM-KI) (CaM kinase I alpha) (CaMKI-alpha)	Camk1	0.0411441	-0.118792	0.0642186	0.0491517	0.0478434	0.0590379
				Q8BW96	KCC1D_MOUSE	Calcium/calmodulin-dependent protein kinase type 1D (EC 2.7.11.17) (CaM kinase I delta) (CaM-KI delta) (CaMKI delta) (CaM kinase ID) (CaMKI-like protein kinase) (CKLiK) (mCKLiK)	Camk1d	0.0147364	0.204944	0.628992	0.0386326	0.546332	0.0181205
+			MC_FC	P11798	KCC2A_MOUSE	Calcium/calmodulin-dependent protein kinase type II subunit alpha (CaM kinase II subunit alpha) (CaMK-II subunit alpha) (EC 2.7.11.17)	Camk2a	0.00130233	-0.470682	0.328102	0.0199189	5.66395e-07	0.371416
+			MC_FC	P28652	KCC2B_MOUSE	Calcium/calmodulin-dependent protein kinase type II subunit beta (CaM kinase II subunit beta) (CaMK-II subunit beta) (EC 2.7.11.17)	Camk2b	0.00801786	-0.260896	0.80885	-0.0062995	0.000538375	0.181917
+			MC_FC	Q6PHZ2	KCC2D_MOUSE	Calcium/calmodulin-dependent protein kinase type II subunit delta (CaM kinase II subunit delta) (CaMK-II subunit delta) (EC 2.7.11.17)	Camk2d	0.00352756	-0.335397	0.000464126	0.121192	0.00656477	0.159585
				Q923T9	KCC2G_MOUSE	Calcium/calmodulin-dependent protein kinase type II subunit gamma (CaM kinase II subunit gamma) (CaMK-II subunit gamma) (EC 2.7.11.17)	Camk2g	0.0271819	0.153325	0.000880946	-0.151914	0.0228647	-0.0915418
				P08414	KCC4_MOUSE	Calcium/calmodulin-dependent protein kinase type IV (CaMK IV) (EC 2.7.11.17) (CaM kinase-GR)	Camk4	0.480896	-0.0261834	0.807737	0.0434268	0.114989	0.227432
				Q8VBY2	KKCC1_MOUSE	Calcium/calmodulin-dependent protein kinase kinase 1 (CaM-KK 1) (CaM-kinase kinase 1) (CaMKK 1) (EC 2.7.11.17) (CaM-kinase IV kinase) (Calcium/calmodulin-dependent protein kinase kinase alpha) (CaM-KK alpha) (CaM-kinase kinase alpha) (CaMKK alpha)	Camkk1	0.107769	0.0795617	0.0156977	-0.16017	0.100287	-0.0724254
				Q8C078	KKCC2_MOUSE	Calcium/calmodulin-dependent protein kinase kinase 2 (CaM-KK 2) (CaM-kinase kinase 2) (CaMKK 2) (EC 2.7.11.17) (Calcium/calmodulin-dependent protein kinase kinase beta) (CaM-KK beta) (CaM-kinase kinase beta) (CaMKK beta)	Camkk2	0.245944	-0.0664818	0.379008	-0.122621	0.0904892	0.159687
+			MC_FC	Q3UHL1	CAMKV_MOUSE	CaM kinase-like vesicle-associated protein	Camkv	0.00215385	-0.627219	0.991255	0.00179863	0.00253708	0.259258
				A2AHC3	CAMP1_MOUSE	Calmodulin-regulated spectrin-associated protein 1	Camsap1	0.56018	-0.0319562	0.19247	0.223017	0.112151	0.241799
				Q8C1B1	CAMP2_MOUSE	Calmodulin-regulated spectrin-associated protein 2 (Calmodulin-regulated spectrin-associated protein 1-like protein 1)	Camsap2	0.0606249	-0.158148	0.651846	0.0560422	0.126038	0.155863
				Q80VC9	CAMP3_MOUSE	Calmodulin-regulated spectrin-associated protein 3 (Marshalin) (Protein Nezha)	Camsap3	0.0317617	-0.204107	0.419228	0.0498462	0.762411	0.0363784
				Q6ZQ38	CAND1_MOUSE	Cullin-associated NEDD8-dissociated protein 1 (Cullin-associated and neddylation-dissociated protein 1) (p120 CAND1)	Cand1	0.157934	-0.0581493	0.235376	-0.0288534	0.111974	0.020546
				P35564	CALX_MOUSE	Calnexin	Canx	0.4866	-0.0206585	0.00809277	0.08917	0.044267	-0.0188651
				P40124	CAP1_MOUSE	Adenylyl cyclase-associated protein 1 (CAP 1)	Cap1	0.388875	-0.0285401	0.995521	-0.000459194	0.00211165	0.0777159
				Q9CYT6	CAP2_MOUSE	Adenylyl cyclase-associated protein 2 (CAP 2)	Cap2	0.0235783	-0.155179	0.494857	-0.0180731	0.00242128	0.150539
+			MC_FC	O35350	CAN1_MOUSE	Calpain-1 catalytic subunit (EC 3.4.22.52) (Calcium-activated neutral proteinase 1) (CANP 1) (Calpain mu-type) (Calpain-1 large subunit) (Micromolar-calpain) (muCANP)	Capn1	0.00931325	0.35246	0.773762	0.0286744	0.367635	-0.152219
				O08529	CAN2_MOUSE	Calpain-2 catalytic subunit (EC 3.4.22.53) (80 kDa M-calpain subunit) (CALP80) (Calcium-activated neutral proteinase 2) (CANP 2) (Calpain M-type) (Calpain-2 large subunit) (Millimolar-calpain) (M-calpain)	Capn2	0.0179471	0.163134	0.00496929	-0.0963984	0.00993444	-0.133818
				O08688	CAN5_MOUSE	Calpain-5 (EC 3.4.22.-) (New calpain 3) (nCL-3)	Capn5	0.740329	-0.0113571	0.234987	0.10314	0.0798424	0.145821
				O88456	CPNS1_MOUSE	Calpain small subunit 1 (CSS1) (Calcium-activated neutral proteinase small subunit) (CANP small subunit) (Calcium-dependent protease small subunit) (CDPS) (Calcium-dependent protease small subunit 1) (Calpain regulatory subunit)	Capns1	0.016946	0.20563	0.0362754	-0.146522	0.0164064	-0.210693
				Q60865	CAPR1_MOUSE	Caprin-1 (Cytoplasmic activation- and proliferation-associated protein 1) (GPI-anchored membrane protein 1) (GPI-anchored protein p137) (GPI-p137) (p137GPI) (Membrane component chromosome 11 surface marker 1) (RNA granule protein 105)	Caprin1	0.418912	0.025527	0.520517	0.0097208	0.0413291	-0.0696759
				P47753	CAZA1_MOUSE	F-actin-capping protein subunit alpha-1 (CapZ alpha-1)	Capza1	0.832673	-0.00645304	0.107893	0.0681896	0.838531	-0.0111198
				P47754	CAZA2_MOUSE	F-actin-capping protein subunit alpha-2 (CapZ alpha-2)	Capza2	0.0139145	-0.236198	0.494857	-0.0554357	0.063954	0.200731
				P47757	CAPZB_MOUSE	F-actin-capping protein subunit beta (CapZ beta)	Capzb	0.211634	-0.0474496	0.0132454	0.0764613	0.0013787	0.107756
				Q9CR86	CHSP1_MOUSE	Calcium-regulated heat stable protein 1 (Calcium-regulated heat-stable protein of 24 kDa) (CRHSP-24)	Carhsp1	0.0109448	0.24141	0.824126	0.00870943	0.979352	-0.00247073
				Q9CZ42	NNRD_MOUSE	ATP-dependent (S)-NAD(P)H-hydrate dehydratase (EC 4.2.1.93) (ATP-dependent NAD(P)HX dehydratase) (Carbohydrate kinase domain-containing protein) (NAD(P)HX dehydratase)	Carkd	0.172277	-0.0566087	0.0260906	0.0477815	0.164219	0.0413511
				Q9ER72	SYCC_MOUSE	Cysteine--tRNA ligase, cytoplasmic (EC 6.1.1.16) (Cysteinyl-tRNA synthetase) (CysRS)	Cars	0.790567	-0.00712109	0.778635	0.0100615	0.31261	0.0131259
				O70589	CSKP_MOUSE	Peripheral plasma membrane protein CASK (EC 2.7.11.1) (Calcium/calmodulin-dependent serine protein kinase)	Cask	0.0895509	-0.0880542	0.0243031	0.0687184	0.197529	0.0562441
				Q6P9K8	CSKI1_MOUSE	Caskin-1 (CASK-interacting protein 1)	Caskin1	0.314214	-0.0330367	0.0446052	0.0594978	0.101708	0.0225372
				P24270	CATA_MOUSE	Catalase (EC 1.11.1.6)	Cat	0.691731	0.0132113	0.0304878	-0.10124	0.140228	-0.107668
				P49817	CAV1_MOUSE	Caveolin-1	Cav1	0.046544	0.146765	0.414441	0.0472186	0.43095	0.0523202
				P48758	CBR1_MOUSE	Carbonyl reductase [NADPH] 1 (EC 1.1.1.184) (15-hydroxyprostaglandin dehydrogenase [NADP(+)]) (EC 1.1.1.196) (EC 1.1.1.197) (20-beta-hydroxysteroid dehydrogenase) (NADPH-dependent carbonyl reductase 1) (Prostaglandin 9-ketoreductase) (PG-9-KR) (Prostaglandin-E(2) 9-reductase) (EC 1.1.1.189)	Cbr1	0.0918398	-0.0818992	0.0315389	0.0789151	0.0578503	0.0636334
				Q8K354	CBR3_MOUSE	Carbonyl reductase [NADPH] 3 (EC 1.1.1.184) (NADPH-dependent carbonyl reductase 3)	Cbr3	0.165123	0.0639973	0.000845409	0.250255	0.000111441	0.43414
				Q91VT4	CBR4_MOUSE	Carbonyl reductase family member 4 (EC 1.-.-.-) (3-ketoacyl-[acyl-carrier-protein] reductase beta subunit) (KAR beta subunit) (3-oxoacyl-[acyl-carrier-protein] reductase) (EC 1.1.1.-) (Quinone reductase CBR4)	Cbr4	0.262711	-0.0541906	0.493464	-0.0500124	0.914218	-0.00942612
				P23198	CBX3_MOUSE	Chromobox protein homolog 3 (Heterochromatin protein 1 homolog gamma) (HP1 gamma) (M32) (Modifier 2 protein)	Cbx3	0.07673	-0.100646	0.0907013	0.0288405	0.118505	0.110934
+			MC_FC	Q61686	CBX5_MOUSE	Chromobox protein homolog 5 (Heterochromatin protein 1 homolog alpha) (HP1 alpha)	Cbx5	0.00641711	-0.29045	0.916422	0.00333047	0.0623813	0.114463
				Q8K1A6	C2D1A_MOUSE	Coiled-coil and C2 domain-containing protein 1A (Five prime repressor element under dual repression-binding protein 1) (FRE under dual repression-binding protein 1) (Freud-1)	Cc2d1a	0.0363098	-0.149689	0.798324	-0.0263758	0.0798424	0.126345
				Q8CH18	CCAR1_MOUSE	Cell division cycle and apoptosis regulator protein 1 (Cell cycle and apoptosis regulatory protein 1) (CARP-1)	Ccar1	0.176439	0.0853062	0.113046	0.167936	0.930332	0.020015
				Q8VDP4	CCAR2_MOUSE	Cell cycle and apoptosis regulator protein 2 (Cell division cycle and apoptosis regulator protein 2)	Ccar2	0.928465	-0.002846	0.238397	0.0694199	0.343252	0.0750246
				Q71RI9	KAT3_MOUSE	Kynurenine--oxoglutarate transaminase 3 (EC 2.6.1.7) (Cysteine-S-conjugate beta-lyase 2) (EC 4.4.1.13) (Kynurenine aminotransferase 3) (Kynurenine aminotransferase III) (KATIII) (Kynurenine--glyoxylate transaminase) (EC 2.6.1.63) (Kynurenine--oxoglutarate transaminase III)	Ccbl2	0.525579	0.0206487	0.163767	-0.119256	0.234103	-0.0909643
				Q3TC33	CC127_MOUSE	Coiled-coil domain-containing protein 127	Ccdc127	0.0296257	-0.193085	0.0509082	-0.221072	0.843137	0.0340981
				Q8CI71	VPS50_MOUSE	Syndetin (Bcl2-like protein blm) (Coiled-coil domain-containing protein 132) (EARP/GARPII complex subunit VPS50)	Ccdc132	0.954579	0.00144434	0.0753717	0.067394	0.156539	0.018877
				Q3TVA9	CC136_MOUSE	Coiled-coil domain-containing protein 136	Ccdc136	0.171612	-0.0664713	0.609502	0.0299847	0.797215	0.0164528
				Q9JIG7	CCD22_MOUSE	Coiled-coil domain-containing protein 22	Ccdc22	0.414711	0.0291674	0.801921	-0.0173678	0.249301	-0.0602772
				Q8CDN8	CCD38_MOUSE	Coiled-coil domain-containing protein 38	Ccdc38	0.139056	0.259079	0.95075	-0.0463808	0.605028	-0.28004
				Q9D024	CCD47_MOUSE	Coiled-coil domain-containing protein 47 (Adipocyte-specific protein 4) (Calumin)	Ccdc47	0.94865	0.00296879	0.800824	0.0503237	0.7739	0.0425315
				Q810U5	CCD50_MOUSE	Coiled-coil domain-containing protein 50 (Protein Ymer)	Ccdc50	0.270806	0.0843508	0.605927	0.115098	0.709306	-0.0795817
				Q8R3Q6	CCD58_MOUSE	Coiled-coil domain-containing protein 58	Ccdc58	0.0988597	0.126927	0.261392	-0.127531	0.812414	0.0363989
				D3YZP9	CCDC6_MOUSE	Coiled-coil domain-containing protein 6	Ccdc6	0.503922	-0.0269856	0.394746	0.0788798	0.242566	0.0588498
	+		FN_FC	Q9D541	CCDC7_MOUSE	Coiled-coil domain-containing protein 7 (Protein BIOT2)	Ccdc7	0.0391562	-0.154984	0.00125737	0.487471	0.000945237	0.590507
				Q5SNZ0	GRDN_MOUSE	Girdin (Akt phosphorylation enhancer) (APE) (Coiled-coil domain-containing protein 88A) (G alpha-interacting vesicle-associated protein) (GIV) (Girders of actin filament) (Hook-related protein 1) (HkRP1)	Ccdc88a	0.0813125	0.106446	0.346803	0.0564415	0.806112	0.0159481
				Q9D8L5	CCD91_MOUSE	Coiled-coil domain-containing protein 91 (GGA-binding partner)	Ccdc91	0.45859	0.0343485	0.423191	-0.0843017	0.704627	-0.0375504
				Q8VDN4	CCD92_MOUSE	Coiled-coil domain-containing protein 92	Ccdc92	0.0179011	0.177583	0.187227	0.154669	0.0692094	-0.106423
				Q7TQK5	CCD93_MOUSE	Coiled-coil domain-containing protein 93	Ccdc93	0.593044	0.0226614	0.730078	0.0410521	0.551465	-0.0574033
				Q8BGU5	CCNY_MOUSE	Cyclin-Y (Cyclin fold protein 1)	Ccny	0.967975	0.00115132	0.11873	0.0664308	0.00276442	0.187881
+			MC_FC	Q9WU84	CCS_MOUSE	Copper chaperone for superoxide dismutase (Superoxide dismutase copper chaperone)	Ccs	0.00784127	0.296735	0.0476289	0.271139	0.905714	0.00589848
				P80314	TCPB_MOUSE	T-complex protein 1 subunit beta (TCP-1-beta) (CCT-beta)	Cct2	0.288706	-0.0380511	0.0144737	0.0572057	0.226108	0.0313988
				P80318	TCPG_MOUSE	T-complex protein 1 subunit gamma (TCP-1-gamma) (CCT-gamma) (Matricin) (mTRiC-P5)	Cct3	0.153779	-0.0674982	0.819908	0.0132184	0.22913	0.049983
				P80315	TCPD_MOUSE	T-complex protein 1 subunit delta (TCP-1-delta) (A45) (CCT-delta)	Cct4	0.0704044	-0.0979924	0.80202	-0.00903749	0.148324	0.0273924
				P80316	TCPE_MOUSE	T-complex protein 1 subunit epsilon (TCP-1-epsilon) (CCT-epsilon)	Cct5	0.169199	-0.0540032	0.111703	0.0443115	0.00678278	0.0732784
				P80317	TCPZ_MOUSE	T-complex protein 1 subunit zeta (TCP-1-zeta) (CCT-zeta-1)	Cct6a	0.257651	-0.0383	0.00105756	0.0573196	0.0169994	0.0319405
				P80313	TCPH_MOUSE	T-complex protein 1 subunit eta (TCP-1-eta) (CCT-eta)	Cct7	0.0815858	-0.0866132	0.840123	-0.00570679	0.933817	-0.00270557
				P42932	TCPQ_MOUSE	T-complex protein 1 subunit theta (TCP-1-theta) (CCT-theta)	Cct8	0.294666	-0.0349283	0.018731	0.0452809	0.0152541	0.0272007
				Q8C1Y8	CCZ1_MOUSE	Vacuolar fusion protein CCZ1 homolog	Ccz1	0.218333	0.0626671	0.501354	-0.0751827	0.232127	-0.1752
+			MC_FC	O54901	OX2G_MOUSE	OX-2 membrane glycoprotein (MRC OX-2 antigen) (CD antigen CD200)	Cd200	0.0035	-0.381663	0.00912089	0.182413	0.00158424	0.139882
				P56528	CD38_MOUSE	ADP-ribosyl cyclase/cyclic ADP-ribose hydrolase 1 (EC 3.2.2.6) (2'-phospho-ADP-ribosyl cyclase) (2'-phospho-ADP-ribosyl cyclase/2'-phospho-cyclic-ADP-ribose transferase) (EC 2.4.99.20) (2'-phospho-cyclic-ADP-ribose transferase) (ADP-ribosyl cyclase 1) (ADPRC 1) (Cyclic ADP-ribose hydrolase 1) (cADPr hydrolase 1) (I-19) (NIM-R5 antigen) (CD antigen CD38)	Cd38	0.0277289	-0.167171	0.000598233	0.319504	0.0040173	0.26936
				Q61735	CD47_MOUSE	Leukocyte surface antigen CD47 (Integrin-associated protein) (IAP) (CD antigen CD47)	Cd47	0.00980531	-0.227312	0.789651	-0.00903869	0.272176	0.0707009
				O55186	CD59A_MOUSE	CD59A glycoprotein (MAC-inhibitory protein) (MAC-IP) (Membrane attack complex inhibition factor) (MACIF) (Protectin) (CD antigen CD59)	Cd59a	0.0812011	-0.112541	0.215266	-0.165993	0.556026	-0.0900722
				P35762	CD81_MOUSE	CD81 antigen (26 kDa cell surface protein TAPA-1) (Target of the antiproliferative antibody 1) (CD antigen CD81)	Cd81	0.206316	0.052453	0.00232521	-0.153342	0.637454	-0.0264783
				P40237	CD82_MOUSE	CD82 antigen (C33 antigen) (IA4) (Inducible membrane protein R2) (Metastasis suppressor Kangai-1 homolog) (CD antigen CD82)	Cd82	0.158767	0.0792511	0.0500351	-0.172124	0.132188	-0.0976963
				P40240	CD9_MOUSE	CD9 antigen (CD antigen CD9)	Cd9	0.0863037	0.0922818	0.00212583	-0.296029	0.0514617	-0.131354
				Q8BIF0	C99L2_MOUSE	CD99 antigen-like protein 2 (MIC2-like protein 1) (CD antigen CD99)	Cd99l2	0.0214118	-0.214087	0.0259288	0.154894	0.0412037	0.195835
				Q8R349	CDC16_MOUSE	Cell division cycle protein 16 homolog (Anaphase-promoting complex subunit 6) (APC6) (Cyclosome subunit 6)	Cdc16	0.198214	-0.0806222	0.0682212	0.18365	0.378286	0.0982406
				Q61081	CDC37_MOUSE	Hsp90 co-chaperone Cdc37 (Hsp90 chaperone protein kinase-targeting subunit) (p50Cdc37) [Cleaved into: Hsp90 co-chaperone Cdc37, N-terminally processed]	Cdc37	0.171472	-0.0568223	0.969878	-0.00109673	0.879319	0.00549412
				P60766	CDC42_MOUSE	Cell division control protein 42 homolog (EC 3.6.5.2) (G25K GTP-binding protein)	Cdc42	0.146716	0.0674119	0.443132	-0.0215006	0.55042	0.023315
				Q3UU96	MRCKA_MOUSE	Serine/threonine-protein kinase MRCK alpha (EC 2.7.11.1) (CDC42-binding protein kinase alpha)	Cdc42bpa	0.197556	0.0650346	0.227322	0.0652597	0.991124	0.00115776
+			MC_FC	Q7TT50	MRCKB_MOUSE	Serine/threonine-protein kinase MRCK beta (EC 2.7.11.1) (CDC42-binding protein kinase beta) (DMPK-like beta) (Myotonic dystrophy kinase-related CDC42-binding kinase beta) (MRCK beta) (Myotonic dystrophy protein kinase-like beta)	Cdc42bpb	0.00803347	-0.274499	0.52953	0.0239091	0.989951	-0.00169349
				Q9JM96	BORG4_MOUSE	Cdc42 effector protein 4 (Binder of Rho GTPases 4)	Cdc42ep4	0.166852	-0.0901248	0.995521	0.00150681	0.819992	0.0225093
+			MC_FC	Q9WTR5	CAD13_MOUSE	Cadherin-13 (Heart cadherin) (H-cadherin) (Truncated cadherin) (T-cad) (T-cadherin)	Cdh13	0.00323077	-0.429206	0.0509439	0.100029	0.0192077	0.154004
				P15116	CADH2_MOUSE	Cadherin-2 (Neural cadherin) (N-cadherin) (CD antigen CD325)	Cdh2	0.0553885	-0.12614	0.168075	0.107943	0.202512	0.0788763
				Q8VDP6	CDIPT_MOUSE	CDP-diacylglycerol--inositol 3-phosphatidyltransferase (EC 2.7.8.11) (Phosphatidylinositol synthase) (PI synthase) (PtdIns synthase)	Cdipt	0.167687	-0.0783706	0.534979	-0.0536752	0.170224	-0.151947
				O35495	CDK14_MOUSE	Cyclin-dependent kinase 14 (EC 2.7.11.22) (Cell division protein kinase 14) (Serine/threonine-protein kinase PFTAIRE-1)	Cdk14	0.414973	-0.0335138	0.818055	-0.0231342	0.181694	-0.130515
+			MC_FC	Q04899	CDK18_MOUSE	Cyclin-dependent kinase 18 (EC 2.7.11.22) (Cell division protein kinase 18) (PCTAIRE-motif protein kinase 3) (Serine/threonine-protein kinase PCTAIRE-3)	Cdk18	0.00554037	-0.320524	0.0108829	0.0888348	0.0234608	0.120374
				P49615	CDK5_MOUSE	Cyclin-dependent-like kinase 5 (EC 2.7.11.1) (CR6 protein kinase) (CRK6) (Cell division protein kinase 5) (Serine/threonine-protein kinase PSSALRE) (Tau protein kinase II catalytic subunit) (TPKII catalytic subunit)	Cdk5	0.335423	0.0323348	0.0329337	-0.0479631	0.159146	-0.0319743
				P46414	CDN1B_MOUSE	Cyclin-dependent kinase inhibitor 1B (Cyclin-dependent kinase inhibitor p27) (p27Kip1)	Cdkn1b	0.151716	0.179258	0.614401	0.181174	0.987055	-0.0067153
				Q99L43	CDS2_MOUSE	Phosphatidate cytidylyltransferase 2 (EC 2.7.7.41) (CDP-DAG synthase 2) (CDP-DG synthase 2) (CDP-diacylglycerol synthase 2) (CDS 2) (CDP-diglyceride pyrophosphorylase 2) (CDP-diglyceride synthase 2) (CTP:phosphatidate cytidylyltransferase 2)	Cds2	0.566837	-0.0177262	0.00351566	0.129137	0.689394	0.0198631
				Q4VAA2	CDV3_MOUSE	Protein CDV3 (Carnitine deficiency-associated protein 3) (Tyrosine-phosphorylated protein 36) (TPP36)	Cdv3	0.415868	0.0278645	0.137016	0.0545192	0.791968	-0.0139284
				Q9JKC6	CEND_MOUSE	Cell cycle exit and neuronal differentiation protein 1 (BM88 antigen)	Cend1	0.758168	0.0096364	0.0240667	-0.155529	0.87646	-0.00908089
				Q6RT24	CENPE_MOUSE	Centromere-associated protein E (Centromere protein E) (CENP-E) (Kinesin superfamily protein 10) (KIF10) (Motor domain of KIF10)	Cenpe	0.22964	0.235751	0.960893	0.0491319	0.713049	-0.309903
+			MC_FC	Q9CXS4	CENPV_MOUSE	Centromere protein V (CENP-V) (Proline-rich protein 6)	Cenpv	0.00802817	-0.245315	0.831051	0.0145314	0.00199597	0.151185
				Q6A065	CE170_MOUSE	Centrosomal protein of 170 kDa (Cep170)	Cep170	0.0831933	-0.0882125	0.0887276	0.0654001	0.460773	0.0230274
				Q80U49	C170B_MOUSE	Centrosomal protein of 170 kDa protein B (Centrosomal protein 170B) (Cep170B)	Cep170b	0.122486	-0.0799913	0.863938	-0.010756	0.222776	-0.0316794
+	+		MC_FC;FN_FC	P23953	EST1C_MOUSE	Carboxylesterase 1C (EC 3.1.1.1) (Liver carboxylesterase N) (Lung surfactant convertase) (PES-N)	Ces1c	0.00219608	-0.707535	0.0042681	-0.46529	0.0327011	-0.292933
				Q9R1K9	CETN2_MOUSE	Centrin-2 (Caltractin isoform 1)	Cetn2	0.0104383	-0.218529	0.00105427	0.22155	0.0212479	0.0935705
				Q8C6E0	CFA36_MOUSE	Cilia- and flagella-associated protein 36 (Coiled-coil domain-containing protein 104)	Cfap36	0.130329	0.0699329	0.309261	0.0410957	0.717155	-0.0166757
				P18760	COF1_MOUSE	Cofilin-1 (Cofilin, non-muscle isoform)	Cfl1	0.173761	0.0550027	0.0468155	-0.0487947	0.0234518	-0.0560827
				P45591	COF2_MOUSE	Cofilin-2 (Cofilin, muscle isoform)	Cfl2	0.0736043	0.0949583	0.000735822	-0.116806	0.0427142	-0.0881314
				Q9D1L0	CHCH2_MOUSE	Coiled-coil-helix-coiled-coil-helix domain-containing protein 2	Chchd2	0.0386338	0.152744	0.494633	-0.0590367	0.243121	-0.0963631
				Q9CRB9	MIC19_MOUSE	MICOS complex subunit Mic19 (Coiled-coil-helix-coiled-coil-helix domain-containing protein 3)	Chchd3	0.0616061	0.108313	0.017762	-0.115598	0.120865	-0.0660157
				Q8VEA4	MIA40_MOUSE	Mitochondrial intermembrane space import and assembly protein 40 (Coiled-coil-helix-coiled-coil-helix domain-containing protein 4)	Chchd4	0.275229	-0.0486419	0.778057	0.0505812	0.0407247	0.108762
				Q91VN4	MIC25_MOUSE	MICOS complex subunit Mic25 (Coiled-coil-helix-coiled-coil-helix domain-containing protein 6)	Chchd6	0.267404	-0.041235	0.452995	-0.0243225	0.410653	0.02282
+			MC_FC	Q8K2Q5	CHCH7_MOUSE	Coiled-coil-helix-coiled-coil-helix domain-containing protein 7	Chchd7	0.0109712	0.276767	0.25422	0.0935795	0.553871	-0.091502
				P26339	CMGA_MOUSE	Chromogranin-A (CgA) [Cleaved into: Pancreastatin; Beta-granin; WE-14; Catestatin; GE-25; Serpinin-RRG; Serpinin (AL26); p-Glu serpinin precursor]	Chga	0.71719	0.0132163	0.189497	0.19999	0.69077	0.0248892
				P16014	SCG1_MOUSE	Secretogranin-1 (Chromogranin-B) (CgB) (Secretogranin I) (SgI) [Cleaved into: CCB peptide; PE-11]	Chgb	0.0387978	-0.173465	0.0576889	0.259173	0.00887707	0.145414
				Q922Q9	CHID1_MOUSE	Chitinase domain-containing protein 1	Chid1	0.627389	-0.0163777	0.998064	0.000150442	0.236618	-0.0718653
				O55229	CHKB_MOUSE	Choline/ethanolamine kinase (Choline kinase beta) (CK) (CKB) (EC 2.7.1.32) (Ethanolamine kinase) (EK) (EC 2.7.1.82) (choline/ethanolamine kinase beta) (CKEKB)	Chkb	0.852639	0.0100462	0.732993	0.0696764	0.324585	0.163038
				P70232	NCHL1_MOUSE	Neural cell adhesion molecule L1-like protein (Cell adhesion molecule with homology to L1CAM) (Chl1-like protein) (Close homolog of L1) [Cleaved into: Processed neural cell adhesion molecule L1-like protein]	Chl1	0.0171004	-0.195308	0.276083	0.0566032	0.315627	0.051573
				Q9QXG2	RAE1_MOUSE	Rab proteins geranylgeranyltransferase component A 1 (Choroideremia protein homolog) (Rab escort protein 1) (REP-1)	Chm	0.0971948	0.126253	0.124972	-0.174605	0.473238	-0.111576
				Q921W0	CHM1A_MOUSE	Charged multivesicular body protein 1a (Chromatin-modifying protein 1a) (CHMP1a)	Chmp1a	0.168306	0.0980442	0.792392	0.057529	0.831176	-0.0257592
				Q9CQD4	CH1B2_MOUSE	Charged multivesicular body protein 1b-2 (Chromatin-modifying protein 1b-2) (CHMP1b-2)	Chmp1b2	0.47541	-0.0250552	0.763031	-0.0240154	0.41189	-0.0528555
				Q8BJF9	CHM2B_MOUSE	Charged multivesicular body protein 2b (Chromatin-modifying protein 2b) (CHMP2b)	Chmp2b	0.240362	0.056663	0.856295	-0.0158496	0.384858	-0.0910351
				Q9D8B3	CHM4B_MOUSE	Charged multivesicular body protein 4b (Chromatin-modifying protein 4b) (CHMP4b)	Chmp4b	0.941731	0.00199318	0.649062	0.0327098	0.362765	0.0396843
				Q9D7S9	CHMP5_MOUSE	Charged multivesicular body protein 5 (Chromatin-modifying protein 5) (SNF7 domain-containing protein 2)	Chmp5	0.695777	-0.0188053	0.746343	-0.0610199	0.74931	0.040972
				P0C0A3	CHMP6_MOUSE	Charged multivesicular body protein 6 (Chromatin-modifying protein 6)	Chmp6	0.440574	0.0354092	0.724381	0.0392454	0.979352	-0.00354266
				Q8R1T1	CHMP7_MOUSE	Charged multivesicular body protein 7 (Chromatin-modifying protein 7)	Chmp7	0.65735	-0.0211675	0.848789	-0.0529907	0.951362	0.0146451
				Q9D1P4	CHRD1_MOUSE	Cysteine and histidine-rich domain-containing protein 1 (CHORD domain-containing protein 1) (CHORD-containing protein 1) (Chp-1) (Protein morgana)	Chordc1	0.344778	-0.0343728	0.878407	-0.00541115	0.698905	-0.013849
				P61022	CHP1_MOUSE	Calcineurin B homologous protein 1 (Calcineurin B-like protein) (Calcium-binding protein CHP) (Calcium-binding protein p22) (EF-hand calcium-binding domain-containing protein p22) (Sid 470) (p24)	Chp1	0.112069	0.100587	0.503638	-0.0571294	0.623513	-0.029237
				Q8WTY4	CPIN1_MOUSE	Anamorsin (Cytokine-induced apoptosis inhibitor 1) (Fe-S cluster assembly protein DRE2 homolog)	Ciapin1	0.192657	0.059356	0.342618	0.0488486	0.173276	-0.0562677
				Q91WS0	CISD1_MOUSE	CDGSH iron-sulfur domain-containing protein 1 (MitoNEET)	Cisd1	0.112252	-0.0686049	0.766651	-0.00832415	0.00644037	0.0587115
				Q9CQB5	CISD2_MOUSE	CDGSH iron-sulfur domain-containing protein 2 (MitoNEET-related 1 protein) (Miner1) (Nervous system overexpressed protein 70)	Cisd2	0.999472	1.90735e-05	0.305551	0.0898829	0.219827	0.138833
				B1AR13	CISD3_MOUSE	CDGSH iron-sulfur domain-containing protein 3, mitochondrial (Melanoma nuclear protein 13)	Cisd3	0.0748027	-0.108199	0.303684	-0.0857663	0.081453	-0.0852127
				P49025	CTRO_MOUSE	Citron Rho-interacting kinase (CRIK) (EC 2.7.11.1) (Rho-interacting, serine/threonine-protein kinase 21)	Cit	0.185564	-0.0586743	0.581312	-0.0209317	0.302724	0.0385332
				Q8BMK4	CKAP4_MOUSE	Cytoskeleton-associated protein 4 (63-kDa cytoskeleton-linking membrane protein) (Climp-63) (p63)	Ckap4	0.677156	0.0126314	0.363648	0.0885098	0.680552	0.0122366
				A2AGT5	CKAP5_MOUSE	Cytoskeleton-associated protein 5	Ckap5	0.977191	0.00069809	0.205041	-0.018014	0.986432	-0.000515938
+			MC_FC	Q04447	KCRB_MOUSE	Creatine kinase B-type (EC 2.7.3.2) (B-CK) (Creatine kinase B chain) (Creatine phosphokinase B-type) (CPK-B)	Ckb	0.00568153	0.303126	0.000994277	-0.124672	5.01756e-05	-0.133492
				P30275	KCRU_MOUSE	Creatine kinase U-type, mitochondrial (EC 2.7.3.2) (Acidic-type mitochondrial creatine kinase) (Mia-CK) (Ubiquitous mitochondrial creatine kinase) (U-MtCK)	Ckmt1	0.0134	0.173778	6.04182e-06	-0.26172	0.00274713	-0.0776563
				Q80TV8	CLAP1_MOUSE	CLIP-associating protein 1 (Cytoplasmic linker-associated protein 1)	Clasp1	0.0314176	0.136348	0.971675	0.0023222	0.0201111	-0.0562768
				Q8BRT1	CLAP2_MOUSE	CLIP-associating protein 2 (Cytoplasmic linker-associated protein 2)	Clasp2	0.801781	-0.00630379	0.100948	-0.025918	0.611279	0.00743341
				Q9Z0S6	CLD10_MOUSE	Claudin-10	Cldn10	0.233818	-0.0548706	0.150752	-0.0906463	0.494534	-0.0511014
				Q60771	CLD11_MOUSE	Claudin-11 (Oligodendrocyte transmembrane protein) (Oligodendrocyte-specific protein)	Cldn11	0.0179168	0.165009	0.0110632	-0.176763	0.0145066	-0.116245
				Q9CQX5	CLDN1_MOUSE	Claudin domain-containing protein 1 (Claudin-25)	Cldnd1	0.221549	0.0578463	0.0259739	-0.186876	0.03449	-0.203034
+			MC_FC	P0C7M9	CLC2L_MOUSE	C-type lectin domain family 2 member L	Clec2l	0.00937931	0.352979	0.027795	-0.22458	0.345887	-0.138548
				Q9QYB1	CLIC4_MOUSE	Chloride intracellular channel protein 4 (mc3s5/mtCLIC)	Clic4	0.0126743	0.211146	0.0742766	-0.140102	0.013332	-0.144849
				Q99KN9	EPN4_MOUSE	Clathrin interactor 1 (Enthoprotin) (Epsin-4) (Epsin-related protein) (EpsinR)	Clint1	0.094103	-0.105923	0.525222	0.0521486	0.317953	0.0732374
				Q922J3	CLIP1_MOUSE	CAP-Gly domain-containing linker protein 1 (Cytoplasmic linker protein 170) (CLIP-170) (Restin)	Clip1	0.0148295	-0.198303	0.111877	0.056987	0.0240904	0.12252
				Q9Z0H8	CLIP2_MOUSE	CAP-Gly domain-containing linker protein 2 (Cytoplasmic linker protein 115) (CLIP-115) (Cytoplasmic linker protein 2)	Clip2	0.753769	-0.00901651	0.289524	0.0371108	0.42114	0.0247478
				Q60649	CLPB_MOUSE	Caseinolytic peptidase B protein homolog (EC 3.6.1.-) (Suppressor of potassium transport defect 3)	Clpb	0.785382	0.0114338	0.484214	-0.080518	0.318876	-0.10411
				O88696	CLPP_MOUSE	ATP-dependent Clp protease proteolytic subunit, mitochondrial (EC 3.4.21.92) (Endopeptidase Clp)	Clpp	0.116941	-0.0715663	0.00727267	0.130208	0.0769309	0.0624664
				Q8VBZ3	CLPT1_MOUSE	Cleft lip and palate transmembrane protein 1 homolog (Thymic epithelial cell surface antigen)	Clptm1	0.262799	0.0461621	0.124737	0.0481191	0.897497	0.0115044
				Q9EPL2	CSTN1_MOUSE	Calsyntenin-1 (Alcadein-alpha) (Alc-alpha) [Cleaved into: Soluble Alc-alpha (SAlc-alpha); CTF1-alpha (C-terminal fragment 1-alpha)]	Clstn1	0.107273	-0.0786588	0.280385	0.0384777	0.0554494	0.0845892
				Q99JH7	CSTN3_MOUSE	Calsyntenin-3 (Alcadein-beta) (Alc-beta)	Clstn3	0.419607	0.036942	0.657594	0.0378003	0.897497	0.0175636
				O08585	CLCA_MOUSE	Clathrin light chain A (Lca)	Clta	0.240236	-0.0427098	0.903679	0.00380898	0.0522884	0.0577431
				Q6IRU5	CLCB_MOUSE	Clathrin light chain B (Lcb)	Cltb	0.101028	-0.0759096	0.488881	-0.0104694	0.0841859	0.0473099
				Q68FD5	CLH1_MOUSE	Clathrin heavy chain 1	Cltc	0.0967099	-0.0741596	0.00351566	-0.0532875	0.646945	-0.00415087
+			MC_FC	Q06890	CLUS_MOUSE	Clusterin (Apolipoprotein J) (Apo-J) (Clustrin) (Sulfated glycoprotein 2) (SGP-2) [Cleaved into: Clusterin beta chain; Clusterin alpha chain]	Clu	0.00817021	-0.257225	0.0134972	-0.0726507	0.00964353	0.0795648
				Q5SW19	CLU_MOUSE	Clustered mitochondria protein homolog	Cluh	0.456469	-0.0454478	0.782175	-0.0442426	0.769488	0.0590291
				Q9D4C9	CLVS1_MOUSE	Clavesin-1 (Retinaldehyde-binding protein 1-like 1)	Clvs1	0.336595	-0.0787845	0.978266	0.00824332	0.958997	-0.018856
				Q8BG92	CLVS2_MOUSE	Clavesin-2 (Retinaldehyde-binding protein 1-like 2)	Clvs2	0.0690842	-0.118661	0.912183	0.00765228	0.825765	0.0183256
				Q8R4N0	CLYBL_MOUSE	Citramalyl-CoA lyase, mitochondrial (EC 4.1.3.25) ((3S)-malyl-CoA thioesterase) (EC 3.1.2.30) (Beta-methylmalate synthase) (EC 2.3.3.-) (Citrate lyase subunit beta-like protein, mitochondrial) (Citrate lyase beta-like) (Malate synthase) (EC 2.3.3.9)	Clybl	0.319998	0.0492029	0.324578	-0.107136	0.572601	-0.0475509
				Q99KK2	NEUA_MOUSE	N-acylneuraminate cytidylyltransferase (EC 2.7.7.43) (CMP-N-acetylneuraminic acid synthase) (CMP-NeuNAc synthase)	Cmas	0.0118692	-0.212511	0.325228	0.0587969	0.0433549	0.0984297
				Q8R1G2	CMBL_MOUSE	Carboxymethylenebutenolidase homolog (EC 3.1.-.-)	Cmbl	0.0794136	-0.135159	0.0904824	0.252406	0.816965	0.0245764
				Q9DBP5	KCY_MOUSE	UMP-CMP kinase (EC 2.7.4.14) (Deoxycytidylate kinase) (CK) (dCMP kinase) (Nucleoside-diphosphate kinase) (EC 2.7.4.6) (Uridine monophosphate/cytidine monophosphate kinase) (UMP/CMP kinase) (UMP/CMPK)	Cmpk1	0.737244	0.00904751	0.28973	-0.0209928	0.649834	-0.01824
				Q3U5Q7	CMPK2_MOUSE	UMP-CMP kinase 2, mitochondrial (EC 2.7.4.14) (Nucleoside-diphosphate kinase) (EC 2.7.4.6) (Thymidylate kinase LPS-inducible member) (TYKi)	Cmpk2	0.794895	0.00780821	0.296665	-0.0517948	0.817988	-0.0111701
				Q8CJ61	CKLF4_MOUSE	CKLF-like MARVEL transmembrane domain-containing protein 4 (Chemokine-like factor superfamily member 4)	Cmtm4	0.0981899	-0.118549	0.871557	0.0228324	0.874094	-0.0217857
				Q9D6G9	CKLF5_MOUSE	CKLF-like MARVEL transmembrane domain-containing protein 5 (Chemokine-like factor superfamily member 5)	Cmtm5	0.046373	0.120042	0.169502	-0.0367596	0.0509277	-0.242974
				P53996	CNBP_MOUSE	Cellular nucleic acid-binding protein (CNBP) (Zinc finger protein 9)	Cnbp	0.758032	-0.011719	0.683524	0.0570426	0.666644	-0.0522392
				Q9D1A2	CNDP2_MOUSE	Cytosolic non-specific dipeptidase (EC 3.4.13.18) (CNDP dipeptidase 2) (Glutamate carboxypeptidase-like protein 1)	Cndp2	0.172708	0.054019	0.979868	-0.000883579	0.0412037	-0.0569129
+			MC_FC	Q9DAW9	CNN3_MOUSE	Calponin-3 (Calponin, acidic isoform)	Cnn3	0.0180559	0.263528	0.752879	0.0354848	0.404683	-0.133001
				Q3TWN3	CNNM2_MOUSE	Metal transporter CNNM2 (Ancient conserved domain-containing protein 2) (mACDP2) (Cyclin-M2)	Cnnm2	0.0180876	-0.25573	0.282961	0.128196	0.240407	0.111926
				Q6ZQ08	CNOT1_MOUSE	CCR4-NOT transcription complex subunit 1 (CCR4-associated factor 1)	Cnot1	0.079303	0.128511	0.96644	-0.0111372	0.399041	-0.205922
+			MC_FC	P16330	CN37_MOUSE	2',3'-cyclic-nucleotide 3'-phosphodiesterase (CNP) (CNPase) (EC 3.1.4.37)	Cnp	0.00339394	0.355411	0.000194995	-0.215343	0.000357875	-0.111841
				Q9QXT0	CNPY2_MOUSE	Protein canopy homolog 2 (MIR-interacting saposin-like protein) (Putative secreted protein ZSIG9) (Transmembrane protein 4)	Cnpy2	0.0288799	-0.226279	0.799669	-0.038738	0.635326	0.0769513
+			MC_FC	Q5M8N0	CNRP1_MOUSE	CB1 cannabinoid receptor-interacting protein 1 (CRIP-1)	Cnrip1	0.00788927	-0.252808	0.017762	0.0730491	0.00639741	0.140902
				O88507	CNTFR_MOUSE	Ciliary neurotrophic factor receptor subunit alpha (CNTF receptor subunit alpha) (CNTFR-alpha)	Cntfr	0.500774	0.0236149	0.529399	0.0397856	0.818574	-0.0276704
				P12960	CNTN1_MOUSE	Contactin-1 (Neural cell surface protein F3)	Cntn1	0.605231	0.0137582	0.00068038	-0.0680394	0.448933	-0.009377
				Q61330	CNTN2_MOUSE	Contactin-2 (Axonal glycoprotein TAG-1) (Axonin-1) (Transient axonal glycoprotein 1) (TAX-1)	Cntn2	0.0131894	0.183706	0.000347871	-0.145489	0.0114662	-0.101442
				Q69Z26	CNTN4_MOUSE	Contactin-4 (Brain-derived immunoglobulin superfamily protein 2) (BIG-2)	Cntn4	0.381545	-0.0597615	0.801047	0.0732677	0.743967	0.0775104
				O54991	CNTP1_MOUSE	Contactin-associated protein 1 (Caspr) (Caspr1) (MHDNIV) (NCP1) (Neurexin IV) (Neurexin-4) (Paranodin)	Cntnap1	0.0619219	0.102562	6.96823e-05	-0.212202	0.0159439	-0.105306
				Q9CPW0	CNTP2_MOUSE	Contactin-associated protein-like 2 (Cell recognition molecule Caspr2)	Cntnap2	0.144858	0.0628505	0.103503	-0.048727	0.181694	-0.0455251
				Q99P47	CNTP4_MOUSE	Contactin-associated protein-like 4 (Cell recognition molecule Caspr4)	Cntnap4	0.0604742	0.123514	0.481093	0.0527546	0.138223	-0.130375
				Q9D2R6	COA3_MOUSE	Cytochrome c oxidase assembly factor 3 homolog, mitochondrial (Coiled-coil domain-containing protein 56)	Coa3	0.218275	-0.0582507	0.0128499	-0.166268	0.812057	-0.0236659
				Q8BGD8	COA6_MOUSE	Cytochrome c oxidase assembly factor 6 homolog	Coa6	0.379901	-0.0584075	0.631925	-0.0902717	0.398576	-0.170807
				Q921H9	COA7_MOUSE	Cytochrome c oxidase assembly factor 7 (Beta-lactamase hcp-like protein) (Respiratory chain assembly factor 1) (Sel1 repeat-containing protein 1)	Coa7	0.0993187	0.119989	0.54793	-0.0744097	0.275327	-0.151685
				Q9DBL7	COASY_MOUSE	Bifunctional coenzyme A synthase (CoA synthase) [Includes: Phosphopantetheine adenylyltransferase (EC 2.7.7.3) (Dephospho-CoA pyrophosphorylase) (Pantetheine-phosphate adenylyltransferase) (PPAT); Dephospho-CoA kinase (DPCK) (EC 2.7.1.24) (Dephosphocoenzyme A kinase) (DPCOAK)]	Coasy	0.0517003	-0.118364	0.443685	-0.0437496	0.726652	-0.00668669
+	+		MC_FC;FN_FC	P08122	CO4A2_MOUSE	Collagen alpha-2(IV) chain [Cleaved into: Canstatin]	Col4a2	0.00233333	0.701251	0.000565403	0.763982	0.0707927	0.211663
+			MC_FC	Q8K4M5	COMD1_MOUSE	COMM domain-containing protein 1 (Protein Murr1)	Commd1	0.0289189	-0.569229	0.311826	0.12546	0.185584	0.820126
				Q9CQ02	COMD4_MOUSE	COMM domain-containing protein 4	Commd4	0.0520222	0.19309	0.96288	0.0132051	0.320315	-0.0887039
				O88587	COMT_MOUSE	Catechol O-methyltransferase (EC 2.1.1.6)	Comt	0.202659	0.0619075	0.0513278	-0.149173	0.0923724	-0.262961
				Q8BIG7	CMTD1_MOUSE	Catechol O-methyltransferase domain-containing protein 1 (EC 2.1.1.-)	Comtd1	0.135776	-0.0659149	0.803476	-0.00836587	0.216417	0.0414882
				Q8CIE6	COPA_MOUSE	Coatomer subunit alpha (Alpha-coat protein) (Alpha-COP) [Cleaved into: Xenin (Xenopsin-related peptide); Proxenin]	Copa	0.15054	0.0641344	0.960893	0.00262356	0.0435758	-0.0712428
				Q9JIF7	COPB_MOUSE	Coatomer subunit beta (Beta-coat protein) (Beta-COP)	Copb1	0.312691	0.038326	0.781952	0.0177789	0.130708	-0.0621102
				O55029	COPB2_MOUSE	Coatomer subunit beta' (Beta'-coat protein) (Beta'-COP) (p102)	Copb2	0.0725097	0.116001	0.117798	-0.115099	0.0257496	-0.161824
				O89079	COPE_MOUSE	Coatomer subunit epsilon (Epsilon-coat protein) (Epsilon-COP)	Cope	0.651715	0.0225434	0.993177	0.00200939	0.973982	0.00650001
				Q9QZE5	COPG1_MOUSE	Coatomer subunit gamma-1 (Gamma-1-coat protein) (Gamma-1-COP)	Copg1	0.15327	0.0676637	0.438718	-0.0329549	0.360439	-0.0474064
				Q9QXK3	COPG2_MOUSE	Coatomer subunit gamma-2 (Gamma-2-coat protein) (Gamma-2-COP)	Copg2	0.182167	0.0708947	0.437206	0.0828412	0.763277	-0.0188122
				P61202	CSN2_MOUSE	COP9 signalosome complex subunit 2 (SGN2) (Signalosome subunit 2) (Alien homolog) (JAB1-containing signalosome subunit 2) (Thyroid receptor-interacting protein 15) (TR-interacting protein 15) (TRIP-15)	Cops2	0.691522	0.0126867	0.869752	0.0115013	0.928085	-0.00381136
				O88543	CSN3_MOUSE	COP9 signalosome complex subunit 3 (SGN3) (Signalosome subunit 3) (JAB1-containing signalosome subunit 3)	Cops3	0.320743	-0.0348356	0.690974	0.0226538	0.975953	0.00113845
				O88544	CSN4_MOUSE	COP9 signalosome complex subunit 4 (SGN4) (Signalosome subunit 4) (JAB1-containing signalosome subunit 4)	Cops4	0.165315	-0.0597024	0.209528	-0.0426917	0.771184	-0.00798512
				O35864	CSN5_MOUSE	COP9 signalosome complex subunit 5 (SGN5) (Signalosome subunit 5) (EC 3.4.-.-) (Jun activation domain-binding protein 1) (Kip1 C-terminus-interacting protein 2)	Cops5	0.765375	0.00927329	0.948845	0.00686765	0.399523	-0.0235939
				O88545	CSN6_MOUSE	COP9 signalosome complex subunit 6 (SGN6) (Signalosome subunit 6) (JAB1-containing signalosome subunit 6)	Cops6	0.557264	0.0178022	0.730208	0.0156531	0.139677	-0.0545976
				Q9CZ04	CSN7A_MOUSE	COP9 signalosome complex subunit 7a (SGN7a) (Signalosome subunit 7a) (JAB1-containing signalosome subunit 7a)	Cops7a	0.691088	0.0146611	0.0440132	-0.0874388	0.558025	-0.0490487
				Q8BV13	CSN7B_MOUSE	COP9 signalosome complex subunit 7b (SGN7b) (Signalosome subunit 7b) (JAB1-containing signalosome subunit 7b)	Cops7b	0.132176	-0.0976093	0.898613	0.0244517	0.529673	0.0674176
				Q8VBV7	CSN8_MOUSE	COP9 signalosome complex subunit 8 (SGN8) (Signalosome subunit 8) (COP9 homolog) (JAB1-containing signalosome subunit 8)	Cops8	0.681165	0.0124013	0.362147	0.0296261	0.48382	0.0313032
				P61924	COPZ1_MOUSE	Coatomer subunit zeta-1 (Zeta-1-coat protein) (Zeta-1 COP)	Copz1	0.369312	0.03862	0.792779	-0.017781	0.557997	0.0504675
				Q8BMS4	COQ3_MOUSE	Ubiquinone biosynthesis O-methyltransferase, mitochondrial (3-demethylubiquinol 3-O-methyltransferase) (EC 2.1.1.64) (Polyprenyldihydroxybenzoate methyltransferase) (EC 2.1.1.114)	Coq3	0.132245	0.0839715	0.0217006	-0.186308	0.0465945	-0.188174
				Q8R1S0	COQ6_MOUSE	Ubiquinone biosynthesis monooxygenase COQ6, mitochondrial (EC 1.14.13.-) (Coenzyme Q10 monooxygenase 6)	Coq6	0.210476	0.0584123	0.96546	-0.00449181	0.558855	0.0362279
				P97478	COQ7_MOUSE	5-demethoxyubiquinone hydroxylase, mitochondrial (DMQ hydroxylase) (EC 1.14.99.60) (Timing protein clk-1 homolog) (Ubiquinone biosynthesis monooxygenase COQ7)	Coq7	0.34313	0.0513139	0.00536634	-0.364843	0.0964047	-0.255815
				Q8K1Z0	COQ9_MOUSE	Ubiquinone biosynthesis protein COQ9, mitochondrial	Coq9	0.0103097	0.228698	0.00376884	-0.215778	0.0191442	-0.123163
+			MC_FC	O89053	COR1A_MOUSE	Coronin-1A (Coronin-like protein A) (Clipin-A) (Coronin-like protein p57) (Tryptophan aspartate-containing coat protein) (TACO)	Coro1a	0.00787251	-0.255352	0.128993	0.0477185	0.00520784	0.126389
				Q9WUM3	COR1B_MOUSE	Coronin-1B (Coronin-2)	Coro1b	0.238268	0.0442901	0.00486498	-0.0607848	0.670218	-0.0137873
				Q9WUM4	COR1C_MOUSE	Coronin-1C (Coronin-3)	Coro1c	0.0322965	-0.129312	0.787157	0.00773478	0.0923297	0.0305085
				Q8BH44	COR2B_MOUSE	Coronin-2B	Coro2b	0.868681	0.00520945	0.952998	-0.00473189	0.938921	0.00447869
				Q9D2V7	CORO7_MOUSE	Coronin-7 (Crn7) (70 kDa WD repeat tumor rejection antigen homolog)	Coro7	0.415325	0.0276005	0.00393105	-0.0834949	0.277744	-0.0584974
				Q9CQI6	COTL1_MOUSE	Coactosin-like protein	Cotl1	0.036354	-0.141558	0.528311	0.0262675	0.226593	-0.039887
				P56394	COX17_MOUSE	Cytochrome c oxidase copper chaperone	Cox17	0.460216	-0.0353158	0.87848	0.0153384	0.788494	-0.0408678
				P19783	COX41_MOUSE	Cytochrome c oxidase subunit 4 isoform 1, mitochondrial (Cytochrome c oxidase polypeptide IV) (Cytochrome c oxidase subunit IV isoform 1) (COX IV-1)	Cox4i1	0.0239401	0.161152	0.000994277	-0.159863	0.0504607	-0.0756302
+			MC_FC	P12787	COX5A_MOUSE	Cytochrome c oxidase subunit 5A, mitochondrial (Cytochrome c oxidase polypeptide Va)	Cox5a	0.00835938	0.229785	0.000514792	-0.133539	0.0117621	-0.0701094
				P19536	COX5B_MOUSE	Cytochrome c oxidase subunit 5B, mitochondrial (Cytochrome c oxidase polypeptide Vb)	Cox5b	0.0104911	0.188328	8.5831e-05	-0.150352	0.305569	-0.0286689
				P56391	CX6B1_MOUSE	Cytochrome c oxidase subunit 6B1 (Cytochrome c oxidase subunit VIb isoform 1) (COX VIb-1)	Cox6b1	0.017037	0.169798	0.00393105	-0.185552	0.000977644	-0.0706868
				Q9CPQ1	COX6C_MOUSE	Cytochrome c oxidase subunit 6C (Cytochrome c oxidase polypeptide VIc)	Cox6c	0.0239821	0.159889	0.000357252	-0.244498	0.0336088	-0.112662
+			MC_FC	P56392	CX7A1_MOUSE	Cytochrome c oxidase subunit 7A1, mitochondrial (Cytochrome c oxidase subunit VIIa-heart) (Cytochrome c oxidase subunit VIIa-H) (Cytochrome c oxidase subunit VIIa-muscle) (Cytochrome c oxidase subunit VIIa-M)	Cox7a1	0.0067	0.446213	0.0440143	-0.231719	0.0892522	-0.217401
				P48771	CX7A2_MOUSE	Cytochrome c oxidase subunit 7A2, mitochondrial (Cytochrome c oxidase subunit VIIa-liver/heart) (Cytochrome c oxidase subunit VIIa-L)	Cox7a2	0.0794669	0.0949113	0.000125384	-0.220688	0.106887	-0.0677357
+			MC_FC	Q61387	COX7R_MOUSE	Cytochrome c oxidase subunit 7A-related protein, mitochondrial (Cytochrome c oxidase subunit VIIa-related protein) (Silica-induced gene 81 protein) (SIG-81) (Supercomplex assembly factor I)	Cox7a2l	0.0317522	0.299484	0.948845	-0.0254738	0.919824	-0.0214496
				P56393	COX7B_MOUSE	Cytochrome c oxidase subunit 7B, mitochondrial (Cytochrome c oxidase polypeptide VIIb)	Cox7b	0.0482468	0.146694	0.0565333	-0.17396	0.0508804	-0.129828
				P17665	COX7C_MOUSE	Cytochrome c oxidase subunit 7C, mitochondrial (Cytochrome c oxidase polypeptide VIIc)	Cox7c	0.0952773	0.0992346	0.00116683	-0.298309	0.00537054	-0.337942
+			MC_FC	Q00493	CBPE_MOUSE	Carboxypeptidase E (CPE) (EC 3.4.17.10) (Carboxypeptidase H) (CPH) (Enkephalin convertase) (Prohormone-processing carboxypeptidase)	Cpe	0.00819469	-0.293344	0.000297592	0.236113	0.00535511	0.195216
				Q812E0	CPEB2_MOUSE	Cytoplasmic polyadenylation element-binding protein 2 (CPE-BP2) (CPE-binding protein 2) (mCPEB-2)	Cpeb2	0.179135	-0.110024	0.782714	-0.0568659	0.488612	-0.109409
+			MC_FC	P63040	CPLX1_MOUSE	Complexin-1 (921-S) (Complexin I) (CPX I) (Synaphin-2)	Cplx1	0.00323967	0.321311	0.000509458	-0.19982	0.00222991	-0.100354
				P84086	CPLX2_MOUSE	Complexin-2 (921-L) (Complexin II) (CPX II) (Synaphin-1)	Cplx2	0.0648333	0.102817	0.966	0.00140095	0.0889471	0.0542688
+			MC_FC	Q80V42	CBPM_MOUSE	Carboxypeptidase M (CPM) (EC 3.4.17.12)	Cpm	0.00834783	0.31461	0.488881	-0.0710392	0.00136822	-0.0925889
				Q8C166	CPNE1_MOUSE	Copine-1 (Copine I)	Cpne1	0.0261561	-0.194538	0.538685	0.0287843	0.829733	0.0178659
+			MC_FC	P59108	CPNE2_MOUSE	Copine-2 (Copine II)	Cpne2	0.00121739	-0.612282	0.0040862	0.20759	0.0145066	0.345308
+			MC_FC	Q8BLR2	CPNE4_MOUSE	Copine-4 (Copine IV)	Cpne4	0.00329412	-0.480359	0.00119237	0.364395	0.987696	-0.00134754
+			MC_FC	Q9Z140	CPNE6_MOUSE	Copine-6 (Copine VI) (Neuronal-copine) (N-copine)	Cpne6	0.00868027	-0.273977	0.00216628	0.149022	0.140997	0.0947523
				Q0VE82	CPNE7_MOUSE	Copine-7 (Copine VII)	Cpne7	0.306645	-0.0753682	0.248291	0.310633	0.12756	0.329696
				P36552	HEM6_MOUSE	Oxygen-dependent coproporphyrinogen-III oxidase, mitochondrial (COX) (Coprogen oxidase) (Coproporphyrinogenase) (EC 1.3.3.3)	Cpox	0.0498503	0.182369	0.923137	0.0108829	0.473183	-0.087774
				Q8BFS6	CPPED_MOUSE	Serine/threonine-protein phosphatase CPPED1 (EC 3.1.3.16) (Calcineurin-like phosphoesterase domain-containing protein 1)	Cpped1	0.0338563	0.189029	0.0397802	-0.108246	0.178762	-0.17152
				Q6NVF9	CPSF6_MOUSE	Cleavage and polyadenylation specificity factor subunit 6	Cpsf6	0.41401	-0.0384955	0.647329	0.0677488	0.569841	0.0387251
				Q8BTV2	CPSF7_MOUSE	Cleavage and polyadenylation specificity factor subunit 7	Cpsf7	0.0686204	-0.140444	0.449558	-0.0526099	0.797689	0.0376043
+			MC_FC	P97742	CPT1A_MOUSE	Carnitine O-palmitoyltransferase 1, liver isoform (CPT1-L) (EC 2.3.1.21) (Carnitine O-palmitoyltransferase I, liver isoform) (CPT I) (CPTI-L) (Carnitine palmitoyltransferase 1A)	Cpt1a	0.008	0.343835	0.163957	-0.138538	0.044267	-0.193123
				Q8BGD5	CPT1C_MOUSE	Carnitine O-palmitoyltransferase 1, brain isoform (CPT1-B) (EC 2.3.1.21) (CPT IC) (Carnitine O-palmitoyltransferase I, brain isoform) (CPTI-B) (Carnitine palmitoyltransferase 1C)	Cpt1c	0.130621	-0.0925398	0.018731	0.184421	0.663243	0.0393219
				P52825	CPT2_MOUSE	Carnitine O-palmitoyltransferase 2, mitochondrial (EC 2.3.1.21) (Carnitine palmitoyltransferase II) (CPT II)	Cpt2	0.0361948	0.171593	0.279911	-0.109696	0.0446532	-0.235063
				P47934	CACP_MOUSE	Carnitine O-acetyltransferase (Carnitine acetylase) (EC 2.3.1.137) (EC 2.3.1.7) (Carnitine acetyltransferase) (CAT) (CrAT)	Crat	0.0800086	0.0947289	0.367555	-0.0370162	0.0465924	-0.0591469
				Q8C7D2	CRBN_MOUSE	Protein cereblon (Protein PiL)	Crbn	0.414811	-0.0302908	0.452383	-0.0763257	0.0834584	-0.130504
				Q91XD7	CREL1_MOUSE	Protein disulfide isomerase Creld1 (EC 5.3.4.1) (Cysteine-rich with EGF-like domain protein 1)	Creld1	0.441207	0.0236294	0.0221652	-0.106608	0.0183086	-0.0873282
				Q9DCT8	CRIP2_MOUSE	Cysteine-rich protein 2 (CRP-2) (Heart LIM protein)	Crip2	0.0271055	-0.183483	0.00394243	0.238283	0.00626303	0.233156
				Q64010	CRK_MOUSE	Adapter molecule crk (Proto-oncogene c-Crk) (p38)	Crk	0.49414	-0.0227435	0.933188	0.00466442	0.193859	-0.0348842
				P47941	CRKL_MOUSE	Crk-like protein	Crkl	0.693925	-0.0109875	0.538685	-0.0242643	0.526387	0.0145171
+			MC_FC	P97427	DPYL1_MOUSE	Dihydropyrimidinase-related protein 1 (DRP-1) (Collapsin response mediator protein 1) (CRMP-1) (Inactive dihydropyrimidinase) (Unc-33-like phosphoprotein 3) (ULIP-3)	Crmp1	0.00594475	-0.276363	9.15525e-05	0.158177	6.39816e-05	0.202317
				Q8CJ40	CROCC_MOUSE	Rootletin (Ciliary rootlet coiled-coil protein)	Crocc	0.650348	-0.0153883	0.427245	0.0521805	0.408084	0.0703597
				P23927	CRYAB_MOUSE	Alpha-crystallin B chain (Alpha(B)-crystallin) (P23)	Cryab	0.0811559	0.0923047	0.000236739	-0.297447	0.718526	-0.0151677
				O54983	CRYM_MOUSE	Ketimine reductase mu-crystallin (EC 1.5.1.25) (NADP-regulated thyroid-hormone-binding protein)	Crym	0.036109	-0.143099	0.000569787	0.299397	0.000501245	0.384696
				P47199	QOR_MOUSE	Quinone oxidoreductase (EC 1.6.5.5) (NADPH:quinone reductase) (Zeta-crystallin)	Cryz	0.186971	0.0658438	0.329369	0.0526764	0.38013	-0.0506256
				Q921W4	QORL1_MOUSE	Quinone oxidoreductase-like protein 1 (EC 1.-.-.-) (Quinone oxidoreductase homolog 1) (QOH-1) (Zeta-crystallin homolog)	Cryzl1	0.650696	-0.0176349	0.465383	0.0588272	0.265894	0.107876
				Q9CZU6	CISY_MOUSE	Citrate synthase, mitochondrial (EC 2.3.3.1) (Citrate (Si)-synthase)	Cs	0.0170775	0.168336	0.00148667	-0.120667	0.18428	-0.0280762
				Q91W50	CSDE1_MOUSE	Cold shock domain-containing protein E1	Csde1	0.0936556	0.0878859	0.521952	0.0301147	0.239717	-0.0497174
				Q9ERK4	XPO2_MOUSE	Exportin-2 (Exp2) (Chromosome segregation 1-like protein) (Importin-alpha re-exporter)	Cse1l	0.040964	-0.129281	0.711881	0.0126266	0.0209741	0.095633
				P41241	CSK_MOUSE	Tyrosine-protein kinase CSK (EC 2.7.10.2) (C-Src kinase) (Protein-tyrosine kinase MPK-2) (p50CSK)	Csk	0.294697	0.0526643	0.983342	0.00441265	0.930332	0.0087266
				Q8BK63	KC1A_MOUSE	Casein kinase I isoform alpha (CKI-alpha) (EC 2.7.11.1) (CK1)	Csnk1a1	0.0724334	0.115749	0.0332074	0.161409	0.475522	-0.0575216
				Q9DC28	KC1D_MOUSE	Casein kinase I isoform delta (CKI-delta) (CKId) (EC 2.7.11.1) (Tau-protein kinase CSNK1D) (EC 2.7.11.26)	Csnk1d	0.653699	0.0159872	0.369176	0.0668149	0.550304	-0.0452356
				Q9JMK2	KC1E_MOUSE	Casein kinase I isoform epsilon (CKI-epsilon) (CKIe) (EC 2.7.11.1)	Csnk1e	0.936288	-0.00260568	0.77662	-0.0436811	0.567479	-0.0572619
				Q8C4X2	KC1G3_MOUSE	Casein kinase I isoform gamma-3 (CKI-gamma 3) (EC 2.7.11.1)	Csnk1g3	0.0758273	0.131806	0.337407	0.0999551	0.105092	-0.137301
				Q60737	CSK21_MOUSE	Casein kinase II subunit alpha (CK II alpha) (EC 2.7.11.1)	Csnk2a1	0.71597	-0.0117033	0.787859	0.0173402	0.56971	0.0308366
				O54833	CSK22_MOUSE	Casein kinase II subunit alpha' (CK II alpha') (EC 2.7.11.1)	Csnk2a2	0.0463909	-0.117949	0.0853349	-0.0646741	0.176097	0.0612822
				P67871	CSK2B_MOUSE	Casein kinase II subunit beta (CK II beta) (Phosvitin)	Csnk2b	0.169528	-0.0623996	0.0330947	0.0619729	0.152313	0.0753107
				Q8VHY0	CSPG4_MOUSE	Chondroitin sulfate proteoglycan 4 (Chondroitin sulfate proteoglycan NG2) (Proteoglycan AN2)	Cspg4	0.466432	-0.0526245	0.980555	-0.0123487	0.937831	0.0228748
+			MC_FC	Q71M36	CSPG5_MOUSE	Chondroitin sulfate proteoglycan 5 (Acidic leucine-rich EGF-like domain-containing brain protein) (Neuroglycan C)	Cspg5	0.00476596	-0.385882	0.427219	-0.0469263	0.00566503	0.233919
				P97315	CSRP1_MOUSE	Cysteine and glycine-rich protein 1 (Cysteine-rich protein 1) (CRP) (CRP1)	Csrp1	0.027431	0.162313	0.00364515	-0.160639	0.0366365	-0.0945849
				P21460	CYTC_MOUSE	Cystatin-C (Cystatin-3)	Cst3	0.973814	-0.00117683	0.130664	-0.126608	0.853943	-0.0191362
				Q62426	CYTB_MOUSE	Cystatin-B (Stefin-B)	Cstb	0.0346119	0.162297	0.223544	-0.0656319	0.0915792	-0.144606
				Q8BIQ5	CSTF2_MOUSE	Cleavage stimulation factor subunit 2 (CF-1 64 kDa subunit) (Cleavage stimulation factor 64 kDa subunit) (CSTF 64 kDa subunit) (CstF-64)	Cstf2	0.119605	0.0839872	0.332388	0.0463257	0.101348	-0.0970778
				O88712	CTBP1_MOUSE	C-terminal-binding protein 1 (CtBP1) (EC 1.1.1.-)	Ctbp1	0.0505717	-0.108153	0.00192425	0.109232	0.00417267	0.10814
				P26231	CTNA1_MOUSE	Catenin alpha-1 (102 kDa cadherin-associated protein) (Alpha E-catenin) (CAP102)	Ctnna1	0.340773	-0.0497136	0.774116	0.0294275	0.624574	-0.0561147
				Q61301	CTNA2_MOUSE	Catenin alpha-2 (Alpha N-catenin)	Ctnna2	0.0109091	-0.194084	0.375395	0.0459013	0.0179122	0.0584831
				Q02248	CTNB1_MOUSE	Catenin beta-1 (Beta-catenin)	Ctnnb1	0.0325307	-0.138937	0.13978	0.0314455	0.339628	0.0401468
				P30999	CTND1_MOUSE	Catenin delta-1 (Cadherin-associated Src substrate) (CAS) (p120 catenin) (p120(ctn)) (p120(cas))	Ctnnd1	0.877539	0.00551486	0.901216	0.0125003	0.683585	0.0503378
				O35927	CTND2_MOUSE	Catenin delta-2 (Neural plakophilin-related ARM-repeat protein) (NPRAP) (Neurojungin)	Ctnnd2	0.015587	-0.186529	0.249888	0.0411322	0.707946	0.020014
				P70698	PYRG1_MOUSE	CTP synthase 1 (EC 6.3.4.2) (CTP synthetase 1) (UTP--ammonia ligase 1)	Ctps1	0.301273	-0.0448933	0.536719	0.0345054	0.558886	0.0471401
				P70303	PYRG2_MOUSE	CTP synthase 2 (EC 6.3.4.2) (CTP synthetase 2) (CTPsH) (UTP--ammonia ligase 2)	Ctps2	0.409047	-0.0370815	0.975913	-0.00421834	0.728582	-0.026974
				P10605	CATB_MOUSE	Cathepsin B (EC 3.4.22.1) (Cathepsin B1) [Cleaved into: Cathepsin B light chain; Cathepsin B heavy chain]	Ctsb	0.0349928	0.1338	0.206744	-0.03109	0.0670188	-0.0854278
				P18242	CATD_MOUSE	Cathepsin D (EC 3.4.23.5)	Ctsd	0.0607329	0.114483	0.640044	-0.0236254	0.0221897	-0.0895305
				Q60598	SRC8_MOUSE	Src substrate cortactin	Cttn	0.285761	-0.041111	0.0635155	0.0495872	0.740664	0.0149899
				B9EJA2	CTTB2_MOUSE	Cortactin-binding protein 2 (CortBP2)	Cttnbp2	0.141458	-0.0721493	0.920471	0.01565	0.450935	0.114697
				Q9WTX6	CUL1_MOUSE	Cullin-1 (CUL-1)	Cul1	0.082862	0.0973277	0.0575834	-0.0565567	0.962816	0.00442338
				Q9D4H8	CUL2_MOUSE	Cullin-2 (CUL-2)	Cul2	0.294968	-0.0385251	0.756782	0.0159118	0.141753	0.0318131
				Q9JLV5	CUL3_MOUSE	Cullin-3 (CUL-3)	Cul3	0.349191	-0.0326533	0.427319	0.0252271	0.313853	0.0321026
				A2A432	CUL4B_MOUSE	Cullin-4B (CUL-4B)	Cul4b	0.521795	0.0196872	0.898613	-0.0124781	0.773875	-0.0182195
				Q9D5V5	CUL5_MOUSE	Cullin-5 (CUL-5)	Cul5	0.142807	-0.0665379	0.0819075	0.0492067	0.0804719	0.0839114
				P56395	CYB5_MOUSE	Cytochrome b5	Cyb5a	0.379776	-0.0312848	0.213431	0.0412579	0.876052	0.0110872
				Q9CQX2	CYB5B_MOUSE	Cytochrome b5 type B (Cytochrome b5 outer mitochondrial membrane isoform)	Cyb5b	0.0724078	-0.126976	0.923137	-0.0155277	0.475471	-0.0615103
				Q9DB73	NB5R1_MOUSE	NADH-cytochrome b5 reductase 1 (b5R.1) (EC 1.6.2.2) (NAD(P)H:quinone oxidoreductase type 3 polypeptide A2)	Cyb5r1	0.0362406	-0.143332	0.564463	-0.0235724	0.289055	0.0478609
				Q9DCN2	NB5R3_MOUSE	NADH-cytochrome b5 reductase 3 (B5R) (Cytochrome b5 reductase) (EC 1.6.2.2) (Diaphorase-1) [Cleaved into: NADH-cytochrome b5 reductase 3 membrane-bound form; NADH-cytochrome b5 reductase 3 soluble form]	Cyb5r3	0.171498	-0.0587826	0.00924525	0.119382	0.144228	0.0420623
				Q9D0M3	CY1_MOUSE	Cytochrome c1, heme protein, mitochondrial (EC 7.1.1.8) (Complex III subunit 4) (Complex III subunit IV) (Cytochrome b-c1 complex subunit 4) (Ubiquinol-cytochrome-c reductase complex cytochrome c1 subunit) (Cytochrome c-1)	Cyc1	0.0371005	0.12229	0.000471475	-0.111587	0.100944	0.0368562
				P62897	CYC_MOUSE	Cytochrome c, somatic	Cycs	0.0410968	0.118329	0.000420294	-0.153366	0.116297	-0.052155
				Q7TMB8	CYFP1_MOUSE	Cytoplasmic FMR1-interacting protein 1 (Specifically Rac1-associated protein 1) (Sra-1)	Cyfip1	0.753732	0.0122745	0.778502	-0.038507	0.925521	-0.00897288
				Q5SQX6	CYFP2_MOUSE	Cytoplasmic FMR1-interacting protein 2 (p53-inducible protein 121)	Cyfip2	0.00864052	-0.217665	0.220692	0.0253367	0.0101925	0.091639
				Q9CX80	CYGB_MOUSE	Cytoglobin (Histoglobin) (HGb)	Cygb	0.447145	-0.0291519	0.912398	-0.00957513	0.0572629	-0.128727
				Q80TQ2	CYLD_MOUSE	Ubiquitin carboxyl-terminal hydrolase CYLD (EC 3.4.19.12) (Deubiquitinating enzyme CYLD) (Ubiquitin thioesterase CYLD) (Ubiquitin-specific-processing protease CYLD)	Cyld	0.0170093	-0.247155	0.33146	0.222482	0.00103444	0.371374
				Q8CIM7	CP2DQ_MOUSE	Cytochrome P450 2D26 (EC 1.14.14.1) (CYPIID26)	Cyp2d26	0.0760574	0.169662	0.101116	-0.2715	0.107063	-0.249134
+			MC_FC	Q9DBX6	CP2S1_MOUSE	Cytochrome P450 2S1 (EC 1.14.14.-) (CYPIIS1) (Hydroperoxy icosatetraenoate dehydratase) (EC 4.2.1.152) (Thromboxane-A synthase) (EC 5.3.99.5)	Cyp2s1	0.008	0.559238	0.542225	-0.19581	0.0935789	-0.311025
				Q9WVK8	CP46A_MOUSE	Cholesterol 24-hydroxylase (CH24H) (EC 1.14.14.25) (Cholesterol 24-monooxygenase) (Cholesterol 24S-hydroxylase) (Cytochrome P450 46A1)	Cyp46a1	0.0235227	-0.208183	0.825864	-0.0171924	0.111974	0.123882
				Q8K0C4	CP51A_MOUSE	Lanosterol 14-alpha demethylase (LDM) (EC 1.14.14.154) (CYPLI) (Cytochrome P450 51A1) (Cytochrome P450-14DM) (Cytochrome P45014DM) (Cytochrome P450LI) (Sterol 14-alpha demethylase)	Cyp51a1	0.18389	0.0855229	0.73965	0.0591502	0.466178	-0.0720716
				Q9D172	GAL3A_MOUSE	Glutamine amidotransferase-like class 1 domain-containing protein 3A, mitochondrial	D10Jhu81e	0.0724737	0.0981865	0.00135941	-0.0874543	0.027708	-0.103202
				Q8BPM0	DAAM1_MOUSE	Disheveled-associated activator of morphogenesis 1	Daam1	0.440742	0.0281091	0.792392	0.0182803	0.968904	0.00604415
				Q80U19	DAAM2_MOUSE	Disheveled-associated activator of morphogenesis 2	Daam2	0.249604	0.0568802	0.960893	0.00647402	0.836823	0.0120361
				Q3UHC7	DAB2P_MOUSE	Disabled homolog 2-interacting protein (DAB2-interacting protein) (ASK-interacting protein 1) (DOC-2/DAB-2 interactive protein)	Dab2ip	0.0760422	-0.147797	0.995521	0.00137067	0.957085	0.00691032
				Q62165	DAG1_MOUSE	Dystroglycan (Dystrophin-associated glycoprotein 1) [Cleaved into: Alpha-dystroglycan (Alpha-DG); Beta-dystroglycan (Beta-DG)]	Dag1	0.699265	-0.0137661	0.354386	0.0513842	0.61314	0.0480151
				Q8VC30	TKFC_MOUSE	Triokinase/FMN cyclase (Bifunctional ATP-dependent dihydroxyacetone kinase/FAD-AMP lyase (cyclizing)) [Includes: ATP-dependent dihydroxyacetone kinase (DHA kinase) (EC 2.7.1.28) (EC 2.7.1.29) (Glycerone kinase) (Triokinase) (Triose kinase); FAD-AMP lyase (cyclizing) (EC 4.6.1.15) (FAD-AMP lyase (cyclic FMN forming)) (FMN cyclase)]	Dak	0.261897	0.0540421	0.547924	0.0782993	0.825219	-0.0142078
				Q922B2	SYDC_MOUSE	Aspartate--tRNA ligase, cytoplasmic (EC 6.1.1.12) (Aspartyl-tRNA synthetase) (AspRS)	Dars	0.065131	0.0997038	0.985434	0.000730038	0.00167585	-0.0943227
				Q9JII5	DAZP1_MOUSE	DAZ-associated protein 1 (Deleted in azoospermia-associated protein 1)	Dazap1	0.170517	0.0677714	0.594629	-0.0436196	0.690579	0.0259843
				P31786	ACBP_MOUSE	Acyl-CoA-binding protein (ACBP) (Diazepam-binding inhibitor) (DBI) (Endozepine) (EP)	Dbi	0.583464	0.0149536	0.0584114	-0.0390158	0.0923235	-0.0515347
				Q9QXS6	DREB_MOUSE	Drebrin (Developmentally-regulated brain protein)	Dbn1	0.284411	-0.0392585	0.461163	0.015656	0.345887	0.0325222
				Q62418	DBNL_MOUSE	Drebrin-like protein (Actin-binding protein 1) (SH3 domain-containing protein 7)	Dbnl	0.48695	0.0233564	0.0551642	0.0716324	0.904724	0.005373
				P53395	ODB2_MOUSE	Lipoamide acyltransferase component of branched-chain alpha-keto acid dehydrogenase complex, mitochondrial (EC 2.3.1.168) (Branched-chain alpha-keto acid dehydrogenase complex component E2) (BCKAD-E2) (BCKADE2) (Dihydrolipoamide acetyltransferase component of branched-chain alpha-keto acid dehydrogenase complex) (Dihydrolipoamide branched chain transacylase) (Dihydrolipoyllysine-residue (2-methyl…	Dbt	0.127231	-0.077816	0.118684	-0.0702176	0.881284	-0.0113006
+			MC_FC	P61963	DCAF7_MOUSE	DDB1- and CUL4-associated factor 7 (WD repeat-containing protein 68) (WD repeat-containing protein An11 homolog)	Dcaf7	0.0109976	-0.271219	0.152373	0.122051	0.436496	0.0648978
				Q8BHC4	DCAKD_MOUSE	Dephospho-CoA kinase domain-containing protein	Dcakd	0.779798	-0.0103922	0.980565	0.00341082	0.849363	0.0173006
				Q9JLM8	DCLK1_MOUSE	Serine/threonine-protein kinase DCLK1 (EC 2.7.11.1) (Doublecortin-like and CAM kinase-like 1) (Doublecortin-like kinase 1)	Dclk1	0.0155	-0.181953	0.282961	0.0342116	0.266299	0.0316367
				Q6PGN3	DCLK2_MOUSE	Serine/threonine-protein kinase DCLK2 (EC 2.7.11.1) (CaMK-like CREB regulatory kinase 2) (CL2) (CLICK-II) (CLICK2) (Doublecortin-like and CAM kinase-like 2) (Doublecortin-like kinase 2)	Dclk2	0.163669	0.0644867	0.151724	-0.0679574	0.117018	-0.0559578
				Q9DAR7	DCPS_MOUSE	m7GpppX diphosphatase (EC 3.6.1.59) (DCS-1) (Decapping scavenger enzyme) (Hint-related 7meGMP-directed hydrolase) (Histidine triad nucleotide-binding protein 5) (Histidine triad protein member 5) (HINT-5) (Scavenger mRNA-decapping enzyme DcpS)	Dcps	0.575872	-0.0191379	0.119642	-0.0851908	0.963549	0.00317955
				O08788	DCTN1_MOUSE	Dynactin subunit 1 (150 kDa dynein-associated polypeptide) (DAP-150) (DP-150) (p150-glued)	Dctn1	0.605255	0.0143833	0.748183	0.00853586	0.74467	0.00511026
				Q99KJ8	DCTN2_MOUSE	Dynactin subunit 2 (50 kDa dynein-associated polypeptide) (Dynactin complex 50 kDa subunit) (DCTN-50) (Growth cone membrane protein 23-48K) (GMP23-48K) (p50 dynamitin)	Dctn2	0.396315	0.026814	0.842346	0.00782633	0.187321	-0.0150275
				Q9Z0Y1	DCTN3_MOUSE	Dynactin subunit 3 (Dynactin light chain p24)	Dctn3	0.463664	-0.0256925	0.643996	-0.0195327	0.208559	0.0574183
				Q8CBY8	DCTN4_MOUSE	Dynactin subunit 4 (Dynactin subunit p62)	Dctn4	0.672369	0.012543	0.305451	0.0240893	0.784661	0.0154212
				Q9QZB9	DCTN5_MOUSE	Dynactin subunit 5 (Dynactin subunit p25)	Dctn5	0.56336	-0.0222127	0.805517	0.0252321	0.0199648	0.0907578
				Q9WUB4	DCTN6_MOUSE	Dynactin subunit 6 (Dynactin subunit p27) (Protein WS-3)	Dctn6	0.961617	-0.00146556	0.34528	0.040637	0.308415	0.085989
				Q9QZ73	DCNL1_MOUSE	DCN1-like protein 1 (DCNL1) (DCUN1 domain-containing protein 1) (Defective in cullin neddylation protein 1-like protein 1) (Testis-specific protein 3)	Dcun1d1	0.529741	0.025245	0.998064	-0.000358582	0.697373	0.0242734
				Q8BZJ7	DCNL2_MOUSE	DCN1-like protein 2 (DCNL2) (DCUN1 domain-containing protein 2) (Defective in cullin neddylation protein 1-like protein 2)	Dcun1d2	0.432654	0.0506902	0.897018	-0.0337486	0.483228	-0.154479
				Q9CWS0	DDAH1_MOUSE	N(G),N(G)-dimethylarginine dimethylaminohydrolase 1 (DDAH-1) (Dimethylarginine dimethylaminohydrolase 1) (EC 3.5.3.18) (DDAHI) (Dimethylargininase-1)	Ddah1	0.0818527	-0.0811634	0.912183	-0.00195169	0.0117957	-0.0470386
				Q99LD8	DDAH2_MOUSE	N(G),N(G)-dimethylarginine dimethylaminohydrolase 2 (DDAH-2) (Dimethylarginine dimethylaminohydrolase 2) (EC 3.5.3.18) (DDAHII) (Dimethylargininase-2)	Ddah2	0.0130578	0.212842	0.0333856	0.103009	0.0312189	-0.123202
				Q3U1J4	DDB1_MOUSE	DNA damage-binding protein 1 (DDB p127 subunit) (Damage-specific DNA-binding protein 1) (UV-damaged DNA-binding factor)	Ddb1	0.756694	-0.00814533	0.44096	0.0162182	0.265894	-0.0239315
+	+		MC_FC;FN_FC	O88533	DDC_MOUSE	Aromatic-L-amino-acid decarboxylase (AADC) (EC 4.1.1.28) (DOPA decarboxylase) (DDC)	Ddc	0.00189831	-0.518159	2.68848e-05	0.42638	0.00138273	0.337884
				Q80YA3	DDHD1_MOUSE	Phospholipase DDHD1 (EC 3.1.1.-) (DDHD domain-containing protein 1) (Phosphatidic acid-preferring phospholipase A1 homolog) (PA-PLA1)	Ddhd1	0.575853	-0.0365655	0.89971	-0.0378673	0.87662	0.0381801
				Q80Y98	DDHD2_MOUSE	Phospholipase DDHD2 (EC 3.1.1.-) (DDHD domain-containing protein 2) (SAM, WWE and DDHD domain-containing protein 1)	Ddhd2	0.557618	0.0202119	0.00699698	0.137206	0.447088	0.0671058
				A2ADY9	DDI2_MOUSE	Protein DDI1 homolog 2 (EC 3.4.23.-)	Ddi2	0.05487	0.181943	0.494857	-0.119266	0.683446	-0.0516171
				O54734	OST48_MOUSE	Dolichyl-diphosphooligosaccharide--protein glycosyltransferase 48 kDa subunit (DDOST 48 kDa subunit) (Oligosaccharyl transferase 48 kDa subunit)	Ddost	0.468161	-0.026098	0.718811	-0.0244882	0.98037	0.0020442
				Q91VR5	DDX1_MOUSE	ATP-dependent RNA helicase DDX1 (EC 3.6.4.13) (DEAD box protein 1)	Ddx1	0.351948	0.0338678	0.104075	-0.0577769	0.211337	-0.0456324
				Q501J6	DDX17_MOUSE	Probable ATP-dependent RNA helicase DDX17 (EC 3.6.4.13) (DEAD box protein 17)	Ddx17	0.0534718	-0.109823	0.913958	0.00281477	0.042638	0.0613015
				Q61655	DD19A_MOUSE	ATP-dependent RNA helicase DDX19A (EC 3.6.4.13) (DEAD box RNA helicase DEAD5) (mDEAD5) (DEAD box protein 19A) (Eukaryotic translation initiation factor 4A-related sequence 1)	Ddx19a	0.343225	0.0365515	0.743743	-0.0161903	0.738404	0.0164187
				Q9Z1N5	DX39B_MOUSE	Spliceosome RNA helicase Ddx39b (EC 3.6.4.13) (56 kDa U2AF65-associated protein) (DEAD box protein UAP56) (HLA-B-associated transcript 1 protein)	Ddx39b	0.111966	-0.0826738	0.919064	0.00531244	0.43785	0.0318112
				Q62167	DDX3X_MOUSE	ATP-dependent RNA helicase DDX3X (EC 3.6.4.13) (D1Pas1-related sequence 2) (DEAD box RNA helicase DEAD3) (mDEAD3) (DEAD box protein 3, X-chromosomal) (Embryonic RNA helicase)	Ddx3x	0.233694	0.0429211	0.826455	-0.00641727	0.100933	-0.0375867
				Q61656	DDX5_MOUSE	Probable ATP-dependent RNA helicase DDX5 (EC 3.6.4.13) (DEAD box RNA helicase DEAD1) (mDEAD1) (DEAD box protein 5) (RNA helicase p68)	Ddx5	0.496482	0.0203424	0.826502	0.0119426	0.846262	-0.00796676
				P54823	DDX6_MOUSE	Probable ATP-dependent RNA helicase DDX6 (EC 3.6.4.13) (ATP-dependent RNA helicase p54) (DEAD box protein 6) (Oncogene RCK homolog)	Ddx6	0.75756	-0.00955296	0.553653	-0.031605	0.485735	-0.0417609
				Q9CQ62	DECR_MOUSE	2,4-dienoyl-CoA reductase, mitochondrial (EC 1.3.1.34) (2,4-dienoyl-CoA reductase [NADPH]) (4-enoyl-CoA reductase [NADPH])	Decr1	0.74137	-0.0110826	0.259815	-0.0550051	0.175467	-0.0905724
+			MC_FC	Q7TNV0	DEK_MOUSE	Protein DEK	Dek	0.00859406	-0.277345	0.228667	-0.0928178	0.00252216	0.273574
				Q9CQJ6	DENR_MOUSE	Density-regulated protein (DRP)	Denr	0.63071	0.015518	0.401648	0.0554473	0.905729	0.00551796
				O54786	DFFA_MOUSE	DNA fragmentation factor subunit alpha (DNA fragmentation factor 45 kDa subunit) (DFF-45) (Inhibitor of CAD) (ICAD)	Dffa	0.0438736	0.203014	0.354126	-0.191617	0.228761	-0.184793
				Q9Z2D3	GSDME_MOUSE	Gasdermin-E (Non-syndromic hearing impairment protein 5 homolog) [Cleaved into: Gasdermin-E, N-terminal (GSDME-NT); Gasdermin-E, C-terminal (GSDME-CT)]	Dfna5	0.306021	-0.0598037	0.531871	0.0560484	0.962694	0.0114243
+			MC_FC	Q6NS52	DGKB_MOUSE	Diacylglycerol kinase beta (DAG kinase beta) (EC 2.7.1.107) (Diglyceride kinase beta) (DGK-beta)	Dgkb	0.00813688	-0.325506	0.818563	-0.0247076	0.183109	0.0898337
				Q9R1C6	DGKE_MOUSE	Diacylglycerol kinase epsilon (DAG kinase epsilon) (EC 2.7.1.107) (Diglyceride kinase epsilon) (DGK-epsilon)	Dgke	0.560766	0.0284696	0.965505	-0.00711226	0.869271	-0.0219676
				Q6P5E8	DGKQ_MOUSE	Diacylglycerol kinase theta (DAG kinase theta) (EC 2.7.1.107) (Diglyceride kinase theta) (DGK-theta)	Dgkq	0.377321	-0.0422788	0.126389	0.134468	0.352027	0.0822957
				O88455	DHCR7_MOUSE	7-dehydrocholesterol reductase (7-DHC reductase) (EC 1.3.1.21) (Sterol Delta(7)-reductase)	Dhcr7	0.0498538	0.154015	0.863799	0.0265031	0.233432	-0.0455353
+			MC_FC	Q9DBB8	DHDH_MOUSE	Trans-1,2-dihydrobenzene-1,2-diol dehydrogenase (EC 1.3.1.20) (D-xylose 1-dehydrogenase) (D-xylose-NADP dehydrogenase) (EC 1.1.1.179) (Dimeric dihydrodiol dehydrogenase)	Dhdh	0.0146141	-0.26799	0.0104533	0.103501	0.343252	0.137147
				O35435	PYRD_MOUSE	Dihydroorotate dehydrogenase (quinone), mitochondrial (DHOdehase) (EC 1.3.5.2) (Dihydroorotate oxidase)	Dhodh	0.740416	0.0137439	0.830182	-0.0586388	0.72805	-0.0444577
				Q99L04	DHRS1_MOUSE	Dehydrogenase/reductase SDR family member 1 (EC 1.1.-.-)	Dhrs1	0.0700351	0.0953414	0.337407	0.0228345	0.683585	0.0134504
				Q99LB2	DHRS4_MOUSE	Dehydrogenase/reductase SDR family member 4 (EC 1.1.1.184) (NADPH-dependent carbonyl reductase/NADP-retinol dehydrogenase) (CR) (PHCR) (NADPH-dependent retinol dehydrogenase/reductase) (NDRD) (mouNRDR) (Peroxisomal short-chain alcohol dehydrogenase) (PSCD)	Dhrs4	0.0626486	0.103874	0.187717	-0.0397224	0.00600043	-0.103789
				Q9CXR1	DHRS7_MOUSE	Dehydrogenase/reductase SDR family member 7 (EC 1.1.-.-) (Retinal short-chain dehydrogenase/reductase 4) (retSDR4)	Dhrs7	0.500291	0.0283754	0.974648	0.00423646	0.528396	-0.0871491
				Q99J47	DRS7B_MOUSE	Dehydrogenase/reductase SDR family member 7B (EC 1.1.-.-) (Short-chain dehydrogenase/reductase family 32C member 1)	Dhrs7b	0.942464	-0.00228333	0.865448	-0.0237837	0.846262	-0.0162933
				O35286	DHX15_MOUSE	Pre-mRNA-splicing factor ATP-dependent RNA helicase DHX15 (EC 3.6.4.13) (DEAH box protein 15)	Dhx15	0.0989487	-0.0908961	0.916422	0.00427032	0.904636	0.00770545
				Q6PGC1	DHX29_MOUSE	ATP-dependent RNA helicase DHX29 (EC 3.6.4.13) (DEAH box protein 29)	Dhx29	0.251436	0.0800107	0.511699	-0.103011	0.96981	0.0094943
				Q99PU8	DHX30_MOUSE	ATP-dependent RNA helicase DHX30 (EC 3.6.4.13) (DEAH box protein 30)	Dhx30	0.210459	0.0762577	0.977138	-0.00653219	0.709158	-0.0420315
				O70133	DHX9_MOUSE	ATP-dependent RNA helicase A (EC 3.6.4.13) (DEAH box protein 9) (mHEL-5) (Nuclear DNA helicase II) (NDH II) (RNA helicase A) (RHA)	Dhx9	0.25346	-0.0436087	0.519222	0.0254872	0.0654466	0.0777633
				O08808	DIAP1_MOUSE	Protein diaphanous homolog 1 (Diaphanous-related formin-1) (DRF1) (p140mDIA) (mDIA1)	Diaph1	0.392989	0.0362265	0.637681	0.0689936	0.709306	-0.050086
				Q8BWT5	DIP2A_MOUSE	Disco-interacting protein 2 homolog A (DIP2 homolog A)	Dip2a	0.0132185	0.197491	0.257059	-0.0507569	0.0473389	-0.0976639
				Q3UH60	DIP2B_MOUSE	Disco-interacting protein 2 homolog B (DIP2 homolog B)	Dip2b	0.17097	0.0614748	0.185213	-0.118358	0.0964382	-0.129946
				Q91Z61	DIRA1_MOUSE	GTP-binding protein Di-Ras1 (Distinct subgroup of the Ras family member 1) (Small GTP-binding tumor suppressor 1)	Diras1	0.615948	-0.0138407	0.177808	-0.0728672	0.314469	0.0293975
				Q5PR73	DIRA2_MOUSE	GTP-binding protein Di-Ras2 (Distinct subgroup of the Ras family member 2)	Diras2	0.0372227	-0.140722	0.440841	-0.0339108	0.101708	0.0611858
				Q8CI75	DI3L2_MOUSE	DIS3-like exonuclease 2 (EC 3.1.13.-)	Dis3l2	0.204942	0.0552001	0.980156	0.00247097	0.0827503	0.0751638
				Q8BMF4	ODP2_MOUSE	Dihydrolipoyllysine-residue acetyltransferase component of pyruvate dehydrogenase complex, mitochondrial (EC 2.3.1.12) (Dihydrolipoamide acetyltransferase component of pyruvate dehydrogenase complex) (Pyruvate dehydrogenase complex component E2) (PDC-E2) (PDCE2)	Dlat	0.0314053	0.129065	0.000116966	-0.155448	0.0314916	-0.0597291
				O08749	DLDH_MOUSE	Dihydrolipoyl dehydrogenase, mitochondrial (EC 1.8.1.4) (Dihydrolipoamide dehydrogenase)	Dld	0.234345	0.0475068	6.40828e-05	-0.214355	0.0480207	-0.078609
				Q811D0	DLG1_MOUSE	Disks large homolog 1 (Embryo-dlg/synapse-associated protein 97) (E-dlg/SAP97) (Synapse-associated protein 97) (SAP-97) (SAP97)	Dlg1	0.0403803	-0.209401	0.792702	-0.0482118	0.115165	0.212798
				Q91XM9	DLG2_MOUSE	Disks large homolog 2 (Channel-associated protein of synapse-110) (Chapsyn-110) (Postsynaptic density protein PSD-93)	Dlg2	0.415106	-0.0254421	0.000612134	0.105123	0.0117714	0.0898037
				P70175	DLG3_MOUSE	Disks large homolog 3 (Synapse-associated protein 102) (SAP-102) (SAP102)	Dlg3	0.0610564	-0.144753	0.361778	0.0966198	0.0610101	0.149841
				Q62108	DLG4_MOUSE	Disks large homolog 4 (Postsynaptic density protein 95) (PSD-95) (Synapse-associated protein 90) (SAP-90) (SAP90)	Dlg4	0.0271437	-0.159728	0.436824	0.0307531	0.0982152	0.0610862
				Q09163	DLK1_MOUSE	Protein delta homolog 1 (DLK-1) (Adipocyte differentiation inhibitor protein) (Preadipocyte factor 1) (Pref-1) [Cleaved into: Fetal antigen 1 (FA1)]	Dlk1	0.415085	0.103069	0.949224	0.0795996	0.766599	-0.153228
				Q9D2G2	ODO2_MOUSE	Dihydrolipoyllysine-residue succinyltransferase component of 2-oxoglutarate dehydrogenase complex, mitochondrial (EC 2.3.1.61) (2-oxoglutarate dehydrogenase complex component E2) (OGDC-E2) (Dihydrolipoamide succinyltransferase component of 2-oxoglutarate dehydrogenase complex) (E2K)	Dlst	0.0557746	0.114089	0.000615141	-0.250957	0.079586	-0.0634027
				P11531	DMD_MOUSE	Dystrophin	Dmd	0.490514	-0.0301101	0.527474	0.0770738	0.284146	0.100665
				Q9WV69	DEMA_MOUSE	Dematin (Dematin actin-binding protein) (Erythrocyte membrane protein band 4.9)	Dmtn	0.475897	-0.0220027	0.542225	0.0199032	0.576943	0.0187221
				Q8BPN8	DMXL2_MOUSE	DmX-like protein 2 (Rabconnectin-3)	Dmxl2	0.907229	-0.00304985	0.87769	0.00622654	0.74467	-0.00424337
				P63037	DNJA1_MOUSE	DnaJ homolog subfamily A member 1 (DnaJ protein homolog 2) (Heat shock 40 kDa protein 4) (Heat shock protein J2) (HSJ-2)	Dnaja1	0.150597	-0.06147	0.0803958	0.0447011	0.0518924	0.06879
				Q9QYJ0	DNJA2_MOUSE	DnaJ homolog subfamily A member 2 (mDj3)	Dnaja2	0.140158	-0.0607657	0.0509249	-0.0207934	0.0884959	0.0455084
				Q99M87	DNJA3_MOUSE	DnaJ homolog subfamily A member 3, mitochondrial (DnaJ protein Tid-1) (mTid-1) (Tumorous imaginal discs protein Tid56 homolog)	Dnaja3	0.748197	-0.0101082	0.910657	-0.00983167	0.897497	0.00719142
				Q9QYJ3	DNJB1_MOUSE	DnaJ homolog subfamily B member 1 (Heat shock 40 kDa protein 1) (HSP40) (Heat shock protein 40)	Dnajb1	0.757958	0.0134315	0.96644	-0.00644779	0.925595	-0.0148642
				Q99KV1	DJB11_MOUSE	DnaJ homolog subfamily B member 11 (APOBEC1-binding protein 2) (ABBP-2) (ER-associated DNAJ) (ER-associated Hsp40 co-chaperone) (Endoplasmic reticulum DNA J domain-containing protein 3) (ER-resident protein ERdj3) (ERdj3) (ERj3p)	Dnajb11	0.198013	0.0572581	0.503615	0.0411208	0.184853	-0.0957906
				Q9QYI5	DNJB2_MOUSE	DnaJ homolog subfamily B member 2 (DnaJ homolog subfamily B member 10) (mDj8)	Dnajb2	0.432279	0.0264082	0.82359	-0.0061605	0.339836	-0.046139
				Q9D832	DNJB4_MOUSE	DnaJ homolog subfamily B member 4	Dnajb4	0.0553747	-0.119854	0.0178674	0.120719	0.0117621	0.103452
				Q5U458	DJC11_MOUSE	DnaJ homolog subfamily C member 11	Dnajc11	0.432255	0.0252416	0.0817122	-0.0687392	0.783486	0.015872
	+		FN_FC	Q9R022	DJC12_MOUSE	DnaJ homolog subfamily C member 12 (J domain-containing protein 1)	Dnajc12	0.103175	-0.10844	0.00135565	0.409804	0.120865	0.141914
				Q9CQV7	TIM14_MOUSE	Mitochondrial import inner membrane translocase subunit TIM14 (DnaJ homolog subfamily C member 19)	Dnajc19	0.844815	-0.00573301	0.27162	-0.0601351	0.631253	0.0223658
				Q91YW3	DNJC3_MOUSE	DnaJ homolog subfamily C member 3 (Interferon-induced, double-stranded RNA-activated protein kinase inhibitor) (Protein kinase inhibitor of 58 kDa) (Protein kinase inhibitor p58)	Dnajc3	0.332786	0.048975	0.44904	0.0762882	0.996605	-0.000533819
				P60904	DNJC5_MOUSE	DnaJ homolog subfamily C member 5 (Cysteine string protein) (CSP) (Cysteine-string protein isoform alpha)	Dnajc5	0.0312103	-0.161807	0.213116	0.0755324	0.287238	0.0300345
				Q80TZ3	AUXI_MOUSE	Putative tyrosine-protein phosphatase auxilin (EC 3.1.3.48) (DnaJ homolog subfamily C member 6)	Dnajc6	0.0392695	-0.126249	0.00879776	0.0653758	0.32253	0.0350657
				Q9QYI3	DNJC7_MOUSE	DnaJ homolog subfamily C member 7 (Cytoplasmic CAR retention protein) (CCRP) (MDj11) (Tetratricopeptide repeat protein 2) (TPR repeat protein 2)	Dnajc7	0.738031	-0.00924993	0.129337	0.039186	0.790969	0.0144727
				Q6NZB0	DNJC8_MOUSE	DnaJ homolog subfamily C member 8	Dnajc8	0.729987	0.0124905	0.854986	-0.027467	0.991124	-0.00119805
+			MC_FC	Q05A62	DNAL1_MOUSE	Dynein light chain 1, axonemal	Dnal1	0.00820513	-0.319925	0.187227	0.0915518	0.0313189	0.184179
				P39053	DYN1_MOUSE	Dynamin-1 (EC 3.6.5.5)	Dnm1	0.0774797	-0.0809631	0.000251995	-0.0603447	0.00219037	0.0524869
				Q8K1M6	DNM1L_MOUSE	Dynamin-1-like protein (EC 3.6.5.5) (Dynamin family member proline-rich carboxyl-terminal domain less) (Dymple) (Dynamin-related protein 1)	Dnm1l	0.0714079	-0.0944276	0.599374	0.0228062	0.00419117	0.0578084
				P39054	DYN2_MOUSE	Dynamin-2 (EC 3.6.5.5) (Dynamin UDNM)	Dnm2	0.385162	-0.0303421	0.0681439	-0.0682945	0.214535	-0.070962
				Q8BZ98	DYN3_MOUSE	Dynamin-3 (EC 3.6.5.5)	Dnm3	0.566687	-0.0169034	0.890638	-0.00473642	0.318332	0.0153995
				Q9Z2W0	DNPEP_MOUSE	Aspartyl aminopeptidase (EC 3.4.11.21)	Dnpep	0.157988	0.0667045	0.764649	-0.0166726	0.683895	0.0195031
				Q8BZN6	DOC10_MOUSE	Dedicator of cytokinesis protein 10 (Zizimin-3)	Dock10	0.152246	0.0768051	0.778057	-0.0327921	0.706584	-0.0294161
				Q8CIQ7	DOCK3_MOUSE	Dedicator of cytokinesis protein 3 (Modifier of cell adhesion) (Presenilin-binding protein) (PBP)	Dock3	0.237394	-0.0490777	0.0866075	0.0840819	0.0261459	0.15639
				P59764	DOCK4_MOUSE	Dedicator of cytokinesis protein 4	Dock4	0.047996	0.175738	0.204473	0.229059	0.846262	0.0384407
				Q8R1A4	DOCK7_MOUSE	Dedicator of cytokinesis protein 7 (Protein moonlight)	Dock7	0.396315	0.0427296	0.585101	0.0934756	0.991124	0.00200772
				Q8BIK4	DOCK9_MOUSE	Dedicator of cytokinesis protein 9 (Cdc42 guanine nucleotide exchange factor zizimin-1) (Zizimin-1)	Dock9	0.0454363	0.166039	0.377952	-0.090256	0.0813444	-0.0934284
+			MC_FC	Q66L44	CBARP_MOUSE	Voltage-dependent calcium channel beta subunit-associated regulatory protein (Downstream of Stk11 protein)	Dos	0.00564557	-0.386662	0.152623	0.0710251	0.297242	0.118331
				Q9D1Q4	DPM3_MOUSE	Dolichol-phosphate mannosyltransferase subunit 3 (Dolichol-phosphate mannose synthase subunit 3) (DPM synthase subunit 3) (Dolichyl-phosphate beta-D-mannosyltransferase subunit 3) (Mannose-P-dolichol synthase subunit 3) (MPD synthase subunit 3)	Dpm3	0.530009	-0.0332429	0.513521	0.105967	0.810987	0.0384593
+			MC_FC	Q6NXK7	DPP10_MOUSE	Inactive dipeptidyl peptidase 10 (Dipeptidyl peptidase X) (DPP X)	Dpp10	0.00790123	-0.284389	0.023169	0.138185	0.000926707	0.180961
				Q99KK7	DPP3_MOUSE	Dipeptidyl peptidase 3 (EC 3.4.14.4) (Dipeptidyl aminopeptidase III) (Dipeptidyl arylamidase III) (Dipeptidyl peptidase III) (DPP III) (Enkephalinase B)	Dpp3	0.0371891	0.121334	0.0633714	-0.0765157	0.00777843	-0.152474
				Q9Z218	DPP6_MOUSE	Dipeptidyl aminopeptidase-like protein 6 (DPPX) (Dipeptidyl aminopeptidase-related protein) (Dipeptidyl peptidase 6) (Dipeptidyl peptidase IV-like protein) (Dipeptidyl peptidase VI) (DPP VI)	Dpp6	0.00889032	-0.219632	0.000274397	0.145808	0.000554983	0.196784
				O08553	DPYL2_MOUSE	Dihydropyrimidinase-related protein 2 (DRP-2) (Unc-33-like phosphoprotein 2) (ULIP-2)	Dpysl2	0.13375	-0.0608234	0.0223654	0.0322022	0.00201501	0.0582557
				Q62188	DPYL3_MOUSE	Dihydropyrimidinase-related protein 3 (DRP-3) (Unc-33-like phosphoprotein 1) (ULIP-1)	Dpysl3	0.278323	0.0378885	0.0707382	0.0378919	0.112547	0.0316505
				O35098	DPYL4_MOUSE	Dihydropyrimidinase-related protein 4 (DRP-4) (Collapsin response mediator protein 3) (CRMP-3) (UNC33-like phosphoprotein 4) (ULIP-4)	Dpysl4	0.0179719	-0.163902	0.00223936	0.154332	0.000730716	0.152971
+			MC_FC	Q9EQF6	DPYL5_MOUSE	Dihydropyrimidinase-related protein 5 (DRP-5) (Collapsin response mediator protein 5) (CRMP-5)	Dpysl5	0.00829457	-0.255107	6.96823e-05	0.161518	0.00836285	0.145611
				Q9QXB9	DRG2_MOUSE	Developmentally-regulated GTP-binding protein 2 (DRG-2) (Translation factor GTPase DRG2) (TRAFAC GTPase DRG2) (EC 3.6.5.-)	Drg2	0.197229	0.0656521	0.743743	0.0311897	0.262945	-0.0688128
				O35075	VP26C_MOUSE	Vacuolar protein sorting-associated protein 26C (Down syndrome critical region protein 3 homolog) (Down syndrome critical region protein A homolog)	Dscr3	0.0621747	-0.134106	0.0880908	-0.129402	0.0314916	-0.236418
				Q91ZU6	DYST_MOUSE	Dystonin (Bullous pemphigoid antigen 1) (BPA) (Dystonia musculorum protein) (Hemidesmosomal plaque protein) (Microtubule actin cross-linking factor 2)	Dst	0.178969	0.0521188	0.125634	-0.0321946	0.0643795	-0.0359206
				Q9R0P5	DEST_MOUSE	Destrin (Actin-depolymerizing factor) (ADF) (Sid 23)	Dstn	0.586229	0.0157924	0.955545	-0.00335264	0.00102461	-0.0610824
				Q9DD18	DTD1_MOUSE	D-aminoacyl-tRNA deacylase 1 (DTD) (EC 3.1.1.96) (DNA-unwinding element-binding protein B) (DUE-B) (Gly-tRNA(Ala) deacylase)	Dtd1	0.0482344	-0.116649	0.686594	0.0163665	0.283051	0.053679
				Q9D2N4	DTNA_MOUSE	Dystrobrevin alpha (DTN-A) (Alpha-dystrobrevin)	Dtna	0.0475161	-0.139685	0.9142	0.00626445	0.117629	0.0958791
				P97930	KTHY_MOUSE	Thymidylate kinase (EC 2.7.4.9) (dTMP kinase)	Dtymk	0.0848623	-0.113811	0.823456	-0.0262053	0.905729	-0.0175266
+			MC_FC	Q8R4V2	DUS15_MOUSE	Dual specificity protein phosphatase 15 (EC 3.1.3.16) (EC 3.1.3.48) (Dual specificity protein phosphatase T-DSP10)	Dusp15	0.00218182	0.568147	0.796491	-0.0290854	0.138107	-0.156719
				Q9D7X3	DUS3_MOUSE	Dual specificity protein phosphatase 3 (EC 3.1.3.16) (EC 3.1.3.48) (T-DSP11) (Vaccinia H1-related phosphatase) (VHR)	Dusp3	0.0289076	0.160343	0.00135941	-0.149775	0.846616	-0.00967121
				Q9JHU4	DYHC1_MOUSE	Cytoplasmic dynein 1 heavy chain 1 (Cytoplasmic dynein heavy chain 1) (Dynein heavy chain, cytosolic)	Dync1h1	0.139017	0.0578856	0.00475571	-0.0366406	0.101872	-0.021812
				O88485	DC1I1_MOUSE	Cytoplasmic dynein 1 intermediate chain 1 (Cytoplasmic dynein intermediate chain 1) (Dynein intermediate chain 1, cytosolic) (DH IC-1)	Dync1i1	0.227048	0.0508838	0.211421	0.0226095	0.963772	-0.00285578
				O88487	DC1I2_MOUSE	Cytoplasmic dynein 1 intermediate chain 2 (Cytoplasmic dynein intermediate chain 2) (Dynein intermediate chain 2, cytosolic) (DH IC-2)	Dync1i2	0.0649192	0.120486	0.871827	-0.0146346	0.28615	-0.0579512
				Q8R1Q8	DC1L1_MOUSE	Cytoplasmic dynein 1 light intermediate chain 1 (Dynein light chain A) (DLC-A) (Dynein light intermediate chain 1, cytosolic)	Dync1li1	0.79736	0.00660658	0.806414	0.00354147	0.0523339	-0.0511608
				Q6PDL0	DC1L2_MOUSE	Cytoplasmic dynein 1 light intermediate chain 2 (Dynein light intermediate chain 2, cytosolic)	Dync1li2	0.0108824	0.189157	0.000295713	-0.155457	0.000387624	-0.13165
				P63168	DYL1_MOUSE	Dynein light chain 1, cytoplasmic (8 kDa dynein light chain) (DLC8) (Dynein light chain LC8-type 1) (Protein inhibitor of neuronal nitric oxide synthase) (PIN) (mPIN)	Dynll1	0.883901	-0.00471854	0.805517	-0.0103383	0.672294	-0.0368395
				Q9D0M5	DYL2_MOUSE	Dynein light chain 2, cytoplasmic (8 kDa dynein light chain b) (DLC8) (DLC8b) (Dynein light chain LC8-type 2)	Dynll2	0.365028	0.0357151	0.27162	-0.0516667	0.286462	-0.0730844
				P62627	DLRB1_MOUSE	Dynein light chain roadblock-type 1 (Dynein light chain 2A, cytoplasmic)	Dynlrb1	0.174219	0.0646074	0.359112	0.0394063	0.090727	0.0914433
				P56387	DYLT3_MOUSE	Dynein light chain Tctex-type 3 (Protein 91/23) (T-complex-associated testis-expressed 1-like)	Dynlt3	0.0617789	0.111614	0.115444	0.131565	0.430134	0.111424
				O35459	ECH1_MOUSE	Delta(3,5)-Delta(2,4)-dienoyl-CoA isomerase, mitochondrial (EC 5.3.3.-)	Ech1	0.472136	-0.0223277	0.945235	0.00489354	0.0893198	-0.0453014
				Q9D9V3	ECHD1_MOUSE	Ethylmalonyl-CoA decarboxylase (EC 4.1.1.94) (Enoyl-CoA hydratase domain-containing protein 1) (Methylmalonyl-CoA decarboxylase) (MMCD)	Echdc1	0.0361518	0.138528	0.0114035	-0.0597944	0.289572	-0.0695822
				Q8BH95	ECHM_MOUSE	Enoyl-CoA hydratase, mitochondrial (EC 4.2.1.17) (Enoyl-CoA hydratase 1) (Short-chain enoyl-CoA hydratase) (SCEH)	Echs1	0.115887	0.0696721	0.00759572	-0.0797276	0.0289864	-0.0676856
				P42125	ECI1_MOUSE	Enoyl-CoA delta isomerase 1, mitochondrial (EC 5.3.3.8) (3,2-trans-enoyl-CoA isomerase) (Delta(3),Delta(2)-enoyl-CoA isomerase) (D3,D2-enoyl-CoA isomerase) (Dodecenoyl-CoA isomerase)	Eci1	0.169084	0.0546699	0.0020951	-0.0705428	0.226348	-0.037394
				Q9WUR2	ECI2_MOUSE	Enoyl-CoA delta isomerase 2 (EC 5.3.3.8) (Delta(3),delta(2)-enoyl-CoA isomerase) (D3,D2-enoyl-CoA isomerase) (Dodecenoyl-CoA isomerase) (Peroxisomal 3,2-trans-enoyl-CoA isomerase) (pECI)	Eci2	0.0438776	0.132939	0.97788	0.00244856	0.155675	-0.0446465
				Q6PDI5	ECM29_MOUSE	Proteasome adapter and scaffold protein ECM29 (Proteasome-associated protein ECM29 homolog)	Ecm29	0.745071	-0.0114286	0.924992	0.00682044	0.888624	-0.0121245
				Q9QZH6	ECSIT_MOUSE	Evolutionarily conserved signaling intermediate in Toll pathway, mitochondrial (Protein SITPEC)	Ecsit	0.0169776	0.219424	0.130664	-0.150279	0.312198	-0.157484
				Q9JMG1	EDF1_MOUSE	Endothelial differentiation-related factor 1 (EDF-1) (Multiprotein-bridging factor 1) (MBF1)	Edf1	0.0690288	-0.187463	0.887453	0.0348649	0.815498	0.0397494
				O35474	EDIL3_MOUSE	EGF-like repeat and discoidin I-like domain-containing protein 3 (Developmentally-regulated endothelial cell locus 1 protein) (Integrin-binding protein DEL1)	Edil3	0.235344	0.0618591	0.0289542	-0.237523	0.265066	-0.146876
				Q8BL66	EEA1_MOUSE	Early endosome antigen 1	Eea1	0.256573	-0.0425205	0.714055	-0.00947142	0.736483	0.00796556
				P10126	EF1A1_MOUSE	Elongation factor 1-alpha 1 (EF-1-alpha-1) (Elongation factor Tu) (EF-Tu) (Eukaryotic elongation factor 1 A-1) (eEF1A-1)	Eef1a1	0.408764	-0.0250101	0.750701	0.00561285	0.117477	-0.0255728
				P62631	EF1A2_MOUSE	Elongation factor 1-alpha 2 (EF-1-alpha-2) (Eukaryotic elongation factor 1 A-2) (eEF1A-2) (Statin-S1)	Eef1a2	0.0682827	0.091259	0.00880237	-0.0894079	0.000730716	-0.160446
				O70251	EF1B_MOUSE	Elongation factor 1-beta (EF-1-beta)	Eef1b	0.0108471	0.200873	0.845827	0.00916338	0.0123489	-0.100594
				P57776	EF1D_MOUSE	Elongation factor 1-delta (EF-1-delta)	Eef1d	0.0312574	0.160334	0.403992	-0.0403666	0.229565	-0.070241
				Q9D8N0	EF1G_MOUSE	Elongation factor 1-gamma (EF-1-gamma) (eEF-1B gamma)	Eef1g	0.018331	0.152573	0.722904	-0.0061717	0.0130751	-0.0797439
				P58252	EF2_MOUSE	Elongation factor 2 (EF-2)	Eef2	0.198037	0.0512519	0.044194	-0.0679421	0.0014811	-0.11761
+	+		MC_FC;FN_FC	Q9D8Y0	EFHD2_MOUSE	EF-hand domain-containing protein D2 (Swiprosin-1)	Efhd2	0.00347287	-0.370017	6.96823e-05	-0.465737	0.0026649	-0.131155
				O35393	EFNB3_MOUSE	Ephrin-B3	Efnb3	0.0116706	0.217343	0.489711	0.0213299	0.191806	-0.0620537
				Q8BG67	EFR3A_MOUSE	Protein EFR3 homolog A (Protein EFR3-like)	Efr3a	0.0757054	0.12594	0.724381	0.0437217	0.632252	-0.0404313
				Q6ZQ18	EFR3B_MOUSE	Protein EFR3 homolog B	Efr3b	0.110789	-0.0849893	0.505975	-0.0207233	0.267102	0.0578477
				O08810	U5S1_MOUSE	116 kDa U5 small nuclear ribonucleoprotein component (Elongation factor Tu GTP-binding domain-containing protein 2) (U5 snRNP-specific protein, 116 kDa) (U5-116 kDa)	Eftud2	0.430852	-0.0311792	0.936152	-0.0112584	0.484648	-0.0405171
				Q9WVK4	EHD1_MOUSE	EH domain-containing protein 1 (PAST homolog 1) (mPAST1)	Ehd1	0.24405	-0.0561199	0.917516	-0.00964403	0.909791	-0.00451183
+			MC_FC	Q8BH64	EHD2_MOUSE	EH domain-containing protein 2	Ehd2	0.0478118	-0.553558	0.773762	0.131974	0.440183	0.571868
				Q9QXY6	EHD3_MOUSE	EH domain-containing protein 3	Ehd3	0.89753	-0.00363064	0.274595	0.0399327	0.0165685	0.0760942
				Q9EQP2	EHD4_MOUSE	EH domain-containing protein 4 (PAST homolog 2) (mPAST2)	Ehd4	0.0362413	-0.133047	0.0792793	0.0647268	0.112547	0.0646343
				P48024	EIF1_MOUSE	Eukaryotic translation initiation factor 1 (eIF1) (Protein translation factor SUI1 homolog)	Eif1	0.0335294	0.133934	0.6978	0.0196877	0.0139034	-0.160091
				Q8BJW6	EIF2A_MOUSE	Eukaryotic translation initiation factor 2A (eIF-2A) [Cleaved into: Eukaryotic translation initiation factor 2A, N-terminally processed]	Eif2a	0.0493437	0.212022	0.572736	-0.13106	0.122635	-0.18898
				Q99LC8	EI2BA_MOUSE	Translation initiation factor eIF-2B subunit alpha (eIF-2B GDP-GTP exchange factor subunit alpha)	Eif2b1	0.0486953	0.137308	0.0509249	-0.122221	0.0182878	-0.178222
				Q99LD9	EI2BB_MOUSE	Translation initiation factor eIF-2B subunit beta (eIF-2B GDP-GTP exchange factor subunit beta)	Eif2b2	0.024997	0.18211	0.780934	0.0217113	0.957133	-0.00768805
				Q61749	EI2BD_MOUSE	Translation initiation factor eIF-2B subunit delta (eIF-2B GDP-GTP exchange factor subunit delta)	Eif2b4	0.122017	0.100015	0.998238	-0.000196934	0.577285	-0.0432668
				Q6ZWX6	IF2A_MOUSE	Eukaryotic translation initiation factor 2 subunit 1 (Eukaryotic translation initiation factor 2 subunit alpha) (eIF-2-alpha) (eIF-2A) (eIF-2alpha)	Eif2s1	0.456647	0.0238838	0.377275	-0.0445776	0.436496	-0.0269995
				Q99L45	IF2B_MOUSE	Eukaryotic translation initiation factor 2 subunit 2 (Eukaryotic translation initiation factor 2 subunit beta) (eIF-2-beta)	Eif2s2	0.292195	-0.0429602	0.401081	-0.0520003	0.400579	-0.0397258
				Q9Z0N1	IF2G_MOUSE	Eukaryotic translation initiation factor 2 subunit 3, X-linked (EC 3.6.5.3) (Eukaryotic translation initiation factor 2 subunit gamma, X-linked) (eIF-2-gamma X)	Eif2s3x	0.140523	0.0701983	0.388168	0.051187	0.37631	-0.0351238
				P23116	EIF3A_MOUSE	Eukaryotic translation initiation factor 3 subunit A (eIF3a) (Centrosomin) (Eukaryotic translation initiation factor 3 subunit 10) (eIF-3-theta) (eIF3 p167) (eIF3 p180) (eIF3 p185) (p162)	Eif3a	0.360849	0.0317206	0.659566	-0.0172067	0.0953295	-0.0503385
				Q8JZQ9	EIF3B_MOUSE	Eukaryotic translation initiation factor 3 subunit B (eIF3b) (Eukaryotic translation initiation factor 3 subunit 9) (eIF-3-eta) (eIF3 p116)	Eif3b	0.348803	0.0327218	0.826108	-0.00568318	0.491599	-0.0304406
				Q8R1B4	EIF3C_MOUSE	Eukaryotic translation initiation factor 3 subunit C (eIF3c) (Eukaryotic translation initiation factor 3 subunit 8) (eIF3 p110)	Eif3c	0.062278	0.108509	0.454235	0.0299802	0.264917	-0.0318036
				O70194	EIF3D_MOUSE	Eukaryotic translation initiation factor 3 subunit D (eIF3d) (Eukaryotic translation initiation factor 3 subunit 7) (eIF-3-zeta) (eIF3 p66)	Eif3d	0.756499	-0.0111623	0.416665	-0.0681293	0.929282	0.0087893
				P60229	EIF3E_MOUSE	Eukaryotic translation initiation factor 3 subunit E (eIF3e) (Eukaryotic translation initiation factor 3 subunit 6) (MMTV integration site 6) (Mammary tumor-associated protein INT-6) (Viral integration site protein INT-6) (eIF-3 p48)	Eif3e	0.0971279	0.0863202	0.23204	-0.0564978	0.313853	-0.0686557
				Q9DCH4	EIF3F_MOUSE	Eukaryotic translation initiation factor 3 subunit F (eIF3f) (Deubiquitinating enzyme eIF3f) (EC 3.4.19.12) (Eukaryotic translation initiation factor 3 subunit 5) (eIF-3-epsilon) (eIF3 p47)	Eif3f	0.842014	0.00668955	0.761866	0.0140333	0.644965	-0.04952
				Q91WK2	EIF3H_MOUSE	Eukaryotic translation initiation factor 3 subunit H (eIF3h) (Eukaryotic translation initiation factor 3 subunit 3) (eIF-3-gamma) (eIF3 p40 subunit)	Eif3h	0.0819052	0.0939643	0.335459	-0.0404444	0.124331	-0.101503
				Q9QZD9	EIF3I_MOUSE	Eukaryotic translation initiation factor 3 subunit I (eIF3i) (Eukaryotic translation initiation factor 3 subunit 2) (TGF-beta receptor-interacting protein 1) (TRIP-1) (eIF-3-beta) (eIF3 p36)	Eif3i	0.629747	-0.0168734	0.324578	-0.0459991	0.708997	-0.027091
				Q3UGC7	EI3JA_MOUSE	Eukaryotic translation initiation factor 3 subunit J-A (eIF3j-A) (Eukaryotic translation initiation factor 3 subunit 1-A) (eIF-3-alpha-A) (eIF3 p35)	Eif3j1	0.301054	0.037617	0.419115	-0.0396793	0.027842	-0.0609119
				Q9DBZ5	EIF3K_MOUSE	Eukaryotic translation initiation factor 3 subunit K (eIF3k) (Eukaryotic translation initiation factor 3 subunit 12) (eIF-3 p25)	Eif3k	0.849144	0.00569153	0.276915	0.107517	0.928262	-0.00560427
				Q8QZY1	EIF3L_MOUSE	Eukaryotic translation initiation factor 3 subunit L (eIF3l) (66 kDa tyrosine-rich heat shock protein) (67 kDa polymerase-associated factor) (Eukaryotic translation initiation factor 3 subunit 6-interacting protein) (Eukaryotic translation initiation factor 3 subunit E-interacting protein) (HSP-66Y) (PAF67)	Eif3l	0.355332	0.0419884	0.481093	-0.0598497	0.033071	-0.16649
				Q99JX4	EIF3M_MOUSE	Eukaryotic translation initiation factor 3 subunit M (eIF3m) (PCI domain-containing protein 1)	Eif3m	0.661591	-0.0175714	0.478023	-0.0733268	0.519849	-0.0322592
				P60843	IF4A1_MOUSE	Eukaryotic initiation factor 4A-I (eIF-4A-I) (eIF4A-I) (EC 3.6.4.13) (ATP-dependent RNA helicase eIF4A-1)	Eif4a1	0.262897	0.0525453	0.91551	-0.0137913	0.925521	0.00454545
				P10630	IF4A2_MOUSE	Eukaryotic initiation factor 4A-II (eIF-4A-II) (eIF4A-II) (EC 3.6.4.13) (ATP-dependent RNA helicase eIF4A-2)	Eif4a2	0.418181	0.0257936	0.07082	-0.03754	0.108459	-0.0578132
				Q91VC3	IF4A3_MOUSE	Eukaryotic initiation factor 4A-III (eIF-4A-III) (eIF4A-III) (EC 3.6.4.13) (ATP-dependent RNA helicase DDX48) (ATP-dependent RNA helicase eIF4A-3) (DEAD box protein 48) (Eukaryotic translation initiation factor 4A isoform 3) [Cleaved into: Eukaryotic initiation factor 4A-III, N-terminally processed]	Eif4a3	0.037024	-0.136917	0.409976	0.0248096	0.115619	0.0670664
				Q8BGD9	IF4B_MOUSE	Eukaryotic translation initiation factor 4B (eIF-4B)	Eif4b	0.633552	-0.0132742	0.0899213	0.0790799	0.357263	0.0523229
				P63073	IF4E_MOUSE	Eukaryotic translation initiation factor 4E (eIF-4E) (eIF4E) (mRNA cap-binding protein) (eIF-4F 25 kDa subunit)	Eif4e	0.61566	0.0244176	0.948845	0.00874782	0.81299	0.0391393
				Q6NZJ6	IF4G1_MOUSE	Eukaryotic translation initiation factor 4 gamma 1 (eIF-4-gamma 1) (eIF-4G 1) (eIF-4G1)	Eif4g1	0.114701	0.0780325	0.637681	0.0132623	0.226814	-0.0559168
				Q62448	IF4G2_MOUSE	Eukaryotic translation initiation factor 4 gamma 2 (eIF-4-gamma 2) (eIF-4G 2) (eIF4G 2) (Novel APOBEC-1 target 1) (Translation repressor NAT1) (p97)	Eif4g2	0.608759	0.0171025	0.328102	0.025924	0.640014	0.0417442
				Q80XI3	IF4G3_MOUSE	Eukaryotic translation initiation factor 4 gamma 3 (eIF-4-gamma 3) (eIF-4G 3) (eIF4G 3) (eIF-4-gamma II) (eIF4GII)	Eif4g3	0.017902	0.194103	0.183039	0.0605967	0.867439	-0.00696087
				Q9WUK2	IF4H_MOUSE	Eukaryotic translation initiation factor 4H (eIF-4H) (Williams-Beuren syndrome chromosomal region 1 protein homolog)	Eif4h	0.572077	-0.0170066	0.933776	0.00446796	0.00969619	0.0536301
				P59325	IF5_MOUSE	Eukaryotic translation initiation factor 5 (eIF-5)	Eif5	0.108867	0.0776801	0.908807	-0.00627804	0.535532	0.0262768
				P63242	IF5A1_MOUSE	Eukaryotic translation initiation factor 5A-1 (eIF-5A-1) (eIF-5A1) (Eukaryotic initiation factor 5A isoform 1) (eIF-5A) (eIF-4D)	Eif5a	0.0749193	0.10829	0.807737	-0.0158591	0.507759	-0.0318279
				O55135	IF6_MOUSE	Eukaryotic translation initiation factor 6 (eIF-6) (B4 integrin interactor) (CAB) (p27(BBP))	Eif6	0.355039	-0.0419021	0.574482	-0.041646	0.556297	-0.0746517
				P70372	ELAV1_MOUSE	ELAV-like protein 1 (Elav-like generic protein) (Hu-antigen R) (HuR) (MelG)	Elavl1	0.112364	-0.0780244	0.128215	-0.0425856	0.688161	0.0140827
				Q60899	ELAV2_MOUSE	ELAV-like protein 2 (ELAV-like neuronal protein 1) (Hu-antigen B) (HuB) (Nervous system-specific RNA-binding protein Mel-N1)	Elavl2	0.0896016	0.083786	0.195078	0.042419	0.0129875	-0.0724092
				Q60900	ELAV3_MOUSE	ELAV-like protein 3 (Hu-antigen C) (HuC)	Elavl3	0.506605	-0.0520239	0.551421	-0.16988	0.352027	0.249665
				Q68FM6	PPR29_MOUSE	Protein phosphatase 1 regulatory subunit 29 (Extracellular leucine-rich repeat and fibronectin type III domain-containing protein 2) (Leucine-rich repeat and fibronectin type-III domain-containing protein 6) (Leucine-rich repeat-containing protein 62)	Elfn2	0.0178248	-0.237598	0.125108	0.168288	0.165508	0.118578
				Q8BHL5	ELMO2_MOUSE	Engulfment and cell motility protein 2 (Protein ced-12 homolog A)	Elmo2	0.881594	-0.005409	0.842279	0.0114458	0.93243	-0.00888205
				Q3V1U8	ELMD1_MOUSE	ELMO domain-containing protein 1	Elmod1	0.0839194	-0.11126	0.714055	-0.033282	0.0600144	0.172458
+			MC_FC	Q91WG4	ELP2_MOUSE	Elongator complex protein 2 (ELP2) (STAT3-interacting protein 1) (StIP1)	Elp2	0.0102174	-0.253163	0.351114	-0.0843122	0.151113	0.107784
				Q9ER73	ELP4_MOUSE	Elongator complex protein 4 (PAX6 neighbor gene protein)	Elp4	0.11593	-0.212394	0.951335	-0.0180349	0.635464	0.172355
				Q8C7X2	EMC1_MOUSE	ER membrane protein complex subunit 1	Emc1	0.375194	0.0357521	0.817209	-0.0140665	0.797689	0.0167451
				Q9CRD2	EMC2_MOUSE	ER membrane protein complex subunit 2 (Tetratricopeptide repeat protein 35) (TPR repeat protein 35)	Emc2	0.360083	0.0595865	0.751939	-0.0690885	0.781633	-0.0489464
				O70378	EMC8_MOUSE	ER membrane protein complex subunit 8 (Neighbor of COX4)	Emc8	0.0885858	0.110732	0.533026	0.0534575	0.460537	-0.0497413
				O08579	EMD_MOUSE	Emerin	Emd	0.186612	0.0975406	0.369297	0.167582	0.83469	-0.0404344
+			MC_FC	Q05BC3	EMAL1_MOUSE	Echinoderm microtubule-associated protein-like 1 (EMAP-1)	Eml1	0.00571795	0.349888	0.0325092	-0.138885	0.00273106	-0.13339
				Q7TNG5	EMAL2_MOUSE	Echinoderm microtubule-associated protein-like 2 (EMAP-2)	Eml2	0.0181458	0.17935	0.00174768	-0.0971303	0.219827	-0.0642691
				Q03173	ENAH_MOUSE	Protein enabled homolog (NPC-derived proline-rich protein 1) (NDPP-1)	Enah	0.755683	0.011246	0.80086	-0.021018	0.965837	-0.00418091
				Q8C522	ENDD1_MOUSE	Endonuclease domain-containing 1 protein (EC 3.1.30.-)	Endod1	0.0133362	0.179043	0.00254422	-0.093555	0.00181425	-0.111725
				P17182	ENOA_MOUSE	Alpha-enolase (EC 4.2.1.11) (2-phospho-D-glycerate hydro-lyase) (Enolase 1) (Non-neural enolase) (NNE)	Eno1	0.133874	0.0594201	0.00317354	-0.027287	0.0306423	-0.0303607
				P17183	ENOG_MOUSE	Gamma-enolase (EC 4.2.1.11) (2-phospho-D-glycerate hydro-lyase) (Enolase 2) (Neural enolase) (Neuron-specific enolase) (NSE)	Eno2	0.117316	0.0703006	0.0136306	-0.0625691	0.0256718	-0.0567927
				Q8BGB7	ENOPH_MOUSE	Enolase-phosphatase E1 (EC 3.1.3.77) (2,3-diketo-5-methylthio-1-phosphopentane phosphatase) (MASA homolog)	Enoph1	0.514652	-0.019701	0.234567	0.0456634	0.688955	-0.0173669
				P06802	ENPP1_MOUSE	Ectonucleotide pyrophosphatase/phosphodiesterase family member 1 (E-NPP 1) (Lymphocyte antigen 41) (Ly-41) (Phosphodiesterase I/nucleotide pyrophosphatase 1) (Plasma-cell membrane glycoprotein PC-1) [Cleaved into: Ectonucleotide pyrophosphatase/phosphodiesterase family member 1, secreted form] [Includes: Alkaline phosphodiesterase I (EC 3.1.4.1); Nucleotide pyrophosphatase (NPPase) (EC 3.6.1.9) (…	Enpp1	0.0170956	0.235778	0.778845	0.0280733	0.4871	0.168752
				Q9R1E6	ENPP2_MOUSE	Ectonucleotide pyrophosphatase/phosphodiesterase family member 2 (E-NPP 2) (EC 3.1.4.39) (Autotaxin) (Extracellular lysophospholipase D) (LysoPLD)	Enpp2	0.0227138	0.254169	0.759819	0.0682495	0.815597	0.0203803
+			MC_FC	Q8BGN3	ENPP6_MOUSE	Glycerophosphocholine cholinephosphodiesterase ENPP6 (GPC-Cpde) (EC 3.1.4.-) (EC 3.1.4.38) (Choline-specific glycerophosphodiester phosphodiesterase) (Ectonucleotide pyrophosphatase/phosphodiesterase family member 6) (E-NPP 6) (NPP-6)	Enpp6	0.00473239	0.365235	0.546604	-0.0378196	0.0456185	-0.0858941
				P60840	ENSA_MOUSE	Alpha-endosulfine (ARPP-19e)	Ensa	0.0626779	-0.106391	0.0979054	0.0590019	0.0286656	0.0865731
+			MC_FC	O55026	ENTP2_MOUSE	Ectonucleoside triphosphate diphosphohydrolase 2 (NTPDase 2) (EC 3.6.1.-) (CD39 antigen-like 1) (Ecto-ATP diphosphohydrolase 2) (Ecto-ATPDase 2) (Ecto-ATPase 2)	Entpd2	0.0120092	-0.342098	0.667364	0.0545654	0.185841	0.210517
				P48193	EPB41_MOUSE	Protein 4.1 (P4.1) (4.1R) (Band 4.1) (Erythrocyte membrane protein band 4.1)	Epb41	0.569692	0.0223677	0.0666897	-0.247244	0.157439	-0.137185
				Q9Z2H5	E41L1_MOUSE	Band 4.1-like protein 1 (Erythrocyte membrane protein band 4.1-like 1) (Neuronal protein 4.1) (4.1N)	Epb41l1	0.0258761	-0.14028	0.00036012	0.125932	0.00590134	0.0871754
				O70318	E41L2_MOUSE	Band 4.1-like protein 2 (Erythrocyte membrane protein band 4.1-like 2) (Generally expressed protein 4.1) (4.1G)	Epb41l2	0.0848116	0.079874	0.00446255	0.0459681	0.562195	-0.0164762
				Q9WV92	E41L3_MOUSE	Band 4.1-like protein 3 (4.1B) (Differentially expressed in adenocarcinoma of the lung protein 1) (DAL-1) (DAL1P) (mDAL-1) (Erythrocyte membrane protein band 4.1-like 3) [Cleaved into: Band 4.1-like protein 3, N-terminally processed]	Epb41l3	0.0942982	0.0763788	0.000131785	-0.0899267	0.0508271	-0.04145
+			MC_FC	Q99M71	EPDR1_MOUSE	Mammalian ependymin-related protein 1 (MERP-1)	Epdr1	0.00650777	0.37277	0.0541625	-0.100536	0.0105164	-0.328486
+			MC_FC	Q03137	EPHA4_MOUSE	Ephrin type-A receptor 4 (EC 2.7.10.1) (Tyrosine-protein kinase receptor MPK-3) (Tyrosine-protein kinase receptor SEK-1)	Epha4	0.00781028	-0.292603	0.374117	0.166246	0.00107517	0.312792
				P54763	EPHB2_MOUSE	Ephrin type-B receptor 2 (EC 2.7.10.1) (Neural kinase) (Nuk receptor tyrosine kinase) (Tyrosine-protein kinase receptor EPH-3) (Tyrosine-protein kinase receptor SEK-3) [Cleaved into: EphB2/CTF1; EphB2/CTF2]	Ephb2	0.232039	-0.0609899	0.879442	-0.0181243	0.879479	0.014816
+			MC_FC	Q9D379	HYEP_MOUSE	Epoxide hydrolase 1 (EC 3.3.2.9) (Epoxide hydratase) (Microsomal epoxide hydrolase) (mEH)	Ephx1	0.0120829	0.278083	0.42697	0.0573549	0.306975	-0.106474
				Q8VEH5	EPMIP_MOUSE	EPM2A-interacting protein 1 (Laforin-interacting protein)	Epm2aip1	0.854921	0.00597429	0.709448	0.0332863	0.517179	-0.0203652
				Q80VP1	EPN1_MOUSE	Epsin-1 (EPS-15-interacting protein 1) (Intersectin-EH-binding protein 1) (Ibp1)	Epn1	0.0734215	-0.109005	0.816311	0.016252	0.28672	0.0480249
				Q8CHU3	EPN2_MOUSE	Epsin-2 (EPS-15-interacting protein 2) (Intersectin-EH-binding protein 2) (Ibp2)	Epn2	0.552169	0.0180156	0.373314	-0.0431428	0.0470979	-0.108245
				Q8CGC7	SYEP_MOUSE	Bifunctional glutamate/proline--tRNA ligase (Bifunctional aminoacyl-tRNA synthetase) [Includes: Glutamate--tRNA ligase (EC 6.1.1.17) (Glutamyl-tRNA synthetase) (GluRS); Proline--tRNA ligase (EC 6.1.1.15) (Prolyl-tRNA synthetase) (ProRS)]	Eprs	0.0205226	0.161726	0.421131	-0.0254097	0.00190388	-0.142551
				P42567	EPS15_MOUSE	Epidermal growth factor receptor substrate 15 (Protein Eps15) (Protein AF-1p)	Eps15	0.0184459	0.192275	0.274339	-0.0658059	0.0807321	-0.13202
				Q60902	EP15R_MOUSE	Epidermal growth factor receptor substrate 15-like 1 (Epidermal growth factor receptor pathway substrate 15-related sequence) (Eps15-rs) (Eps15-related protein) (Eps15R)	Eps15l1	0.581139	0.0178919	0.14353	-0.0626221	0.120516	-0.0852513
				Q6PH08	ERC2_MOUSE	ERC protein 2 (CAZ-associated structural protein 1) (CAST1)	Erc2	0.0305407	-0.135694	0.000464126	0.145354	0.0596886	0.0599346
				Q9DC16	ERGI1_MOUSE	Endoplasmic reticulum-Golgi intermediate compartment protein 1 (ER-Golgi intermediate compartment 32 kDa protein) (ERGIC-32)	Ergic1	0.0586585	-0.147947	0.33969	0.0679262	0.553871	0.0616684
				P84089	ERH_MOUSE	Enhancer of rudimentary homolog (Mer)	Erh	0.197277	-0.0510354	0.345348	0.0277331	0.261605	0.0233381
				Q8C460	ERI3_MOUSE	ERI1 exoribonuclease 3 (EC 3.1.-.-) (Prion interactor 1) (Prion protein-interacting protein)	Eri3	0.0302029	-0.189135	0.896566	0.0120132	0.525748	0.0625012
				Q8BFZ9	ERLN2_MOUSE	Erlin-2 (Endoplasmic reticulum lipid raft-associated protein 2) (Stomatin-prohibitin-flotillin-HflC/K domain-containing protein 2) (SPFH domain-containing protein 2)	Erlin2	0.0170732	-0.176264	0.000157079	0.208889	0.00682424	0.116069
+			MC_FC	Q5EBJ4	ERMIN_MOUSE	Ermin (Juxtanodin) (JN)	Ermn	0.00656863	0.280866	0.0042681	-0.150991	0.00274713	-0.124618
				Q3UVK0	ERMP1_MOUSE	Endoplasmic reticulum metallopeptidase 1 (EC 3.4.-.-) (Felix-ina)	Ermp1	0.0156965	0.190478	0.66218	-0.0242734	0.00181425	-0.119221
				Q8R180	ERO1A_MOUSE	ERO1-like protein alpha (ERO1-L) (ERO1-L-alpha) (EC 1.8.4.-) (Endoplasmic reticulum oxidoreductase alpha) (Endoplasmic reticulum oxidoreductin-1-like protein) (Oxidoreductin-1-L-alpha)	Ero1l	0.247265	-0.0657432	0.44122	0.074244	0.576663	0.0550134
				P57759	ERP29_MOUSE	Endoplasmic reticulum resident protein 29 (ERp29)	Erp29	0.00965714	-0.219397	0.0218924	0.109066	0.467658	0.0307691
				Q9D1Q6	ERP44_MOUSE	Endoplasmic reticulum resident protein 44 (ER protein 44) (ERp44) (Thioredoxin domain-containing protein 4)	Erp44	0.0756874	0.0938044	0.0820842	0.0364513	0.0930103	-0.0721898
				Q9R0P3	ESTD_MOUSE	S-formylglutathione hydrolase (FGH) (EC 3.1.2.12) (Esterase 10) (Esterase D) (Sid 478)	Esd	0.286983	-0.0373368	0.997061	0.000130653	0.102631	0.0336194
+	+		MC_FC;FN_FC	Q3U7R1	ESYT1_MOUSE	Extended synaptotagmin-1 (E-Syt1) (Membrane-bound C2 domain-containing protein)	Esyt1	0.0024	0.487131	0.000157994	-0.426876	0.00306542	-0.329906
				Q3TZZ7	ESYT2_MOUSE	Extended synaptotagmin-2 (E-Syt2)	Esyt2	0.808179	-0.00906968	0.419158	-0.134715	0.209738	-0.0573208
				Q8BWY3	ERF1_MOUSE	Eukaryotic peptide chain release factor subunit 1 (Eukaryotic release factor 1) (eRF1)	Etf1	0.0505317	0.12682	0.539665	0.0344477	0.0471927	-0.0791767
				Q99LC5	ETFA_MOUSE	Electron transfer flavoprotein subunit alpha, mitochondrial (Alpha-ETF)	Etfa	0.0131239	0.175378	0.0218966	-0.0329404	0.00167548	-0.0996709
				Q9DCW4	ETFB_MOUSE	Electron transfer flavoprotein subunit beta (Beta-ETF)	Etfb	0.0507823	0.111258	0.000400516	-0.0936193	0.0165722	-0.108644
				Q921G7	ETFD_MOUSE	Electron transfer flavoprotein-ubiquinone oxidoreductase, mitochondrial (ETF-QO) (ETF-ubiquinone oxidoreductase) (EC 1.5.5.1) (Electron-transferring-flavoprotein dehydrogenase) (ETF dehydrogenase)	Etfdh	0.0308779	0.148492	0.427263	-0.0399513	0.097047	-0.0672317
				Q9DCM0	ETHE1_MOUSE	Persulfide dioxygenase ETHE1, mitochondrial (EC 1.13.11.18) (Ethylmalonic encephalopathy protein 1 homolog) (Hepatoma subtracted clone one protein) (Sulfur dioxygenase ETHE1)	Ethe1	0.0145237	0.211311	0.107309	-0.107308	0.0425454	-0.107764
				P70429	EVL_MOUSE	Ena/VASP-like protein (Ena/vasodilator-stimulated phosphoprotein-like)	Evl	0.0843659	-0.10658	0.0283491	0.0999823	0.430429	0.0624306
				Q61545	EWS_MOUSE	RNA-binding protein EWS	Ewsr1	0.182695	-0.0705044	0.386148	0.0631938	0.467319	0.0702448
				Q8R3S6	EXOC1_MOUSE	Exocyst complex component 1 (Exocyst complex component Sec3)	Exoc1	0.558538	-0.0202696	0.719602	-0.023587	0.741092	0.0183516
				Q9D4H1	EXOC2_MOUSE	Exocyst complex component 2 (Exocyst complex component Sec5)	Exoc2	0.461166	0.027554	0.732993	0.018609	0.74467	-0.0275612
				Q6KAR6	EXOC3_MOUSE	Exocyst complex component 3 (Exocyst complex component Sec6)	Exoc3	0.60506	-0.0160697	0.158658	0.0572264	0.56363	0.0179725
				O35382	EXOC4_MOUSE	Exocyst complex component 4 (Exocyst complex component Sec8)	Exoc4	0.486694	-0.0297623	0.825449	-0.0347085	0.691464	-0.0391991
				Q3TPX4	EXOC5_MOUSE	Exocyst complex component 5 (Exocyst complex component Sec10)	Exoc5	0.557931	-0.0193133	0.37369	0.0287015	0.376658	0.0395038
				A6H5Z3	EXC6B_MOUSE	Exocyst complex component 6B (Exocyst complex component Sec15B) (SEC15-like protein 2)	Exoc6b	0.121231	-0.104526	0.501049	-0.0801375	0.786171	-0.0226853
				O35250	EXOC7_MOUSE	Exocyst complex component 7 (Exocyst complex component Exo70)	Exoc7	0.430195	-0.0310674	0.560129	-0.0382683	0.876055	0.0127287
				Q6PGF7	EXOC8_MOUSE	Exocyst complex component 8 (Exocyst complex 84 kDa subunit)	Exoc8	0.307206	0.03509	0.560093	0.0358472	0.722085	-0.012789
				Q8C163	EXOG_MOUSE	Nuclease EXOG, mitochondrial (EC 3.1.30.-) (Endonuclease G-like 1) (Endo G-like 1)	Exog	0.23352	-0.0513375	0.000885696	-0.165804	0.464595	-0.0967615
				P26040	EZRI_MOUSE	Ezrin (Cytovillin) (Villin-2) (p81)	Ezr	0.0400044	-0.17871	0.319096	-0.156823	0.978997	-0.00367141
				P20352	TF_MOUSE	Tissue factor (TF) (Coagulation factor III) (CD antigen CD142)	F3	0.0362512	0.151222	0.121723	-0.0551517	0.0472868	-0.177304
				Q00558	HAP40_MOUSE	40-kDa huntingtin-associated protein (CpG island protein) (Factor VIII intron 22 protein)	F8a1	0.489785	-0.0322046	0.564704	-0.0352826	0.350834	0.118804
				P11404	FABPH_MOUSE	Fatty acid-binding protein, heart (Fatty acid-binding protein 3) (Heart-type fatty acid-binding protein) (H-FABP) (Mammary-derived growth inhibitor) (MDGI)	Fabp3	0.314144	-0.0394125	0.701053	0.016921	0.738404	0.0184705
+			MC_FC	Q05816	FABP5_MOUSE	Fatty acid-binding protein 5 (Epidermal-type fatty acid-binding protein) (E-FABP) (Fatty acid-binding protein, epidermal) (Keratinocyte lipid-binding protein) (Psoriasis-associated fatty acid-binding protein homolog) (PA-FABP)	Fabp5	0.00326667	0.328342	0.00248881	-0.098104	1.15584e-05	-0.151561
+			MC_FC	P51880	FABP7_MOUSE	Fatty acid-binding protein, brain (Brain lipid-binding protein) (BLBP) (Brain-type fatty acid-binding protein) (B-FABP) (Fatty acid-binding protein 7)	Fabp7	0.00336842	-0.429141	0.9142	-0.00788784	0.00770513	0.261747
				P54731	FAF1_MOUSE	FAS-associated factor 1	Faf1	0.313869	-0.0505121	0.922299	0.0160801	0.143811	-0.0870399
				Q3TDN2	FAF2_MOUSE	FAS-associated factor 2 (UBX domain-containing protein 8)	Faf2	0.0336158	0.176395	0.312615	-0.0426505	0.647308	-0.0414572
+			MC_FC	P35505	FAAA_MOUSE	Fumarylacetoacetase (FAA) (EC 3.7.1.2) (Beta-diketonase) (Fumarylacetoacetate hydrolase)	Fah	0.00644231	0.309477	0.111473	-0.0938351	0.011067	-0.140287
				Q8R0F8	FAHD1_MOUSE	Acylpyruvase FAHD1, mitochondrial (EC 3.7.1.5) (Fumarylacetoacetate hydrolase domain-containing protein 1) (Oxaloacetate decarboxylase) (OAA decarboxylase) (EC 4.1.1.112)	Fahd1	0.0674272	0.108449	0.521952	-0.0214121	0.573279	0.0290039
				Q3TC72	FAHD2_MOUSE	Fumarylacetoacetate hydrolase domain-containing protein 2A (EC 3.-.-.-)	Fahd2	0.797505	-0.00703979	0.711156	0.0131154	0.0267762	-0.0772424
				Q8K097	LFG2_MOUSE	Protein lifeguard 2 (Fas apoptotic inhibitory molecule 2) (Neural membrane protein 35)	Faim2	0.0776659	-0.102603	0.654663	0.0267344	0.408846	0.0434082
				Q8VE88	F1142_MOUSE	Protein FAM114A2	Fam114a2	0.238546	-0.0925384	0.968187	0.00872755	0.99657	0.0017252
				Q6A0A9	F120A_MOUSE	Constitutive coactivator of PPAR-gamma-like protein 1 (Oxidative stress-associated Src activator) (Protein FAM120A)	FAM120A	0.739481	0.0241311	0.680368	0.132688	0.556297	-0.176553
				Q8C729	F126B_MOUSE	Protein FAM126B	Fam126b	0.0372154	-0.153021	0.144512	-0.0651414	0.242488	0.0914757
				Q9CR98	F136A_MOUSE	Protein FAM136A	Fam136a	0.350982	-0.0418789	0.103152	0.0961137	0.4871	0.0549874
				Q9D6U8	F162A_MOUSE	Protein FAM162A (E2-induced gene 5 protein homolog) (Growth and transformation-dependent protein) (HGTD-P)	Fam162a	0.0629198	0.11376	0.00339619	-0.191197	0.0303734	-0.130126
				Q5XG69	F169A_MOUSE	Soluble lamin-associated protein of 75 kDa (SLAP75) (Protein FAM169A)	Fam169a	0.0499006	-0.17682	0.274339	0.111043	0.18428	0.142953
				Q3TCJ1	ABRX2_MOUSE	BRISC complex subunit Abraxas 2 (Abraxas brother protein 1) (Protein FAM175B)	Fam175b	0.17152	0.0669899	0.027795	0.120182	0.359831	0.0651033
+			MC_FC	Q8BR63	F177A_MOUSE	Protein FAM177A1	Fam177a1	0.0097971	0.240839	0.00595302	-0.147314	0.00832718	-0.184037
				Q9CYH2	PXL2A_MOUSE	Peroxiredoxin-like 2A (Peroxiredoxin-like 2 activated in M-CSF stimulated monocytes) (Protein PAMM) (Redox-regulatory protein FAM213A)	Fam213a	0.539423	-0.0169063	0.0177574	0.0555029	0.0208335	0.0324359
				Q9DB60	PXL2B_MOUSE	Prostamide/prostaglandin F synthase (Prostamide/PG F synthase) (Prostamide/PGF synthase) (EC 1.11.1.20) (Peroxiredoxin-like 2B)	Fam213b	0.0816125	0.0943067	0.785691	-0.0180967	0.213422	-0.0357211
+			MC_FC	Q8BHZ0	CYRIA_MOUSE	CYFIP-related Rac1 interactor A	Fam49a	0.0155187	-0.327538	0.863799	-0.0371294	0.313299	0.152964
				Q921M7	CYRIB_MOUSE	CYFIP-related Rac1 interactor B (Protein FAM49B)	Fam49b	0.222543	-0.0438929	0.852893	-0.00417519	0.12455	0.0261927
				Q76LS9	MINY1_MOUSE	Ubiquitin carboxyl-terminal hydrolase MINDY-1 (EC 3.4.19.12) (Deubiquitinating enzyme MINDY-1) (NF-E2 inducible protein) (Protein FAM63A)	Fam63a	0.0577314	0.142935	0.183637	-0.13956	0.360779	-0.0719976
				Q6PDI6	MINY2_MOUSE	Ubiquitin carboxyl-terminal hydrolase MINDY-2 (EC 3.4.19.12) (Deubiquitinating enzyme MINDY-2) (Protein FAM63B)	Fam63b	0.459708	-0.0287879	0.762918	-0.031368	0.314469	0.0800755
				Q68FE6	RIPR1_MOUSE	Rho family-interacting cell polarization regulator 1	Fam65a	0.508915	0.0293994	0.419158	0.109547	0.875962	-0.0241513
				Q8BK03	MIGA2_MOUSE	Mitoguardin 2 (Protein FAM73B)	Fam73b	0.492521	-0.0709352	0.438726	-0.299356	0.971784	0.0187559
+			MC_FC	Q3TJZ6	FA98A_MOUSE	Protein FAM98A	Fam98a	0.00575904	0.392186	0.398501	-0.0690587	0.0458065	-0.168745
				Q80VD1	FA98B_MOUSE	Protein FAM98B	Fam98b	0.0543053	-0.112904	0.124878	0.0667872	0.0191442	0.0605252
				F8VPU2	FARP1_MOUSE	FERM, ARHGEF and pleckstrin domain-containing protein 1 (FERM, RhoGEF and pleckstrin domain-containing protein 1)	Farp1	0.0700637	-0.126243	0.302249	-0.0463145	0.449217	0.0622456
				Q8C0C7	SYFA_MOUSE	Phenylalanine--tRNA ligase alpha subunit (EC 6.1.1.20) (Phenylalanyl-tRNA synthetase alpha subunit) (PheRS)	Farsa	0.169432	0.0685267	0.837816	-0.0166898	0.0600628	-0.0655134
				Q9WUA2	SYFB_MOUSE	Phenylalanine--tRNA ligase beta subunit (EC 6.1.1.20) (Phenylalanyl-tRNA synthetase beta subunit) (PheRS)	Farsb	0.0839499	0.0943851	0.994289	0.000646353	0.138223	-0.0605283
				P19096	FAS_MOUSE	Fatty acid synthase (EC 2.3.1.85) (Type I Fatty Acid Synthase) [Includes: [Acyl-carrier-protein] S-acetyltransferase (EC 2.3.1.38); [Acyl-carrier-protein] S-malonyltransferase (EC 2.3.1.39); 3-oxoacyl-[acyl-carrier-protein] synthase (EC 2.3.1.41); 3-oxoacyl-[acyl-carrier-protein] reductase (EC 1.1.1.100); 3-hydroxyacyl-[acyl-carrier-protein] dehydratase (EC 4.2.1.59); Enoyl-[acyl-carrier-protein]…	Fasn	0.453883	-0.0210733	0.0246217	-0.0265512	0.281931	-0.0176024
+	+		MC_FC;FN_FC	P62862	RS30_MOUSE	40S ribosomal protein S30	Fau	0	1.69526	0.000810385	1.76504	0.00850266	0.342562
+			MC_FC	Q3UMF9	FAXC_MOUSE	Failed axon connections homolog	Faxc	0.0183328	-0.346287	0.791169	-0.0848207	0.345887	0.114121
				P35550	FBRL_MOUSE	rRNA 2'-O-methyltransferase fibrillarin (EC 2.1.1.-) (Histone-glutamine methyltransferase) (Nucleolar protein 1) (U6 snRNA 2'-O-methyltransferase fibrillarin)	Fbl	0.0103978	-0.231499	0.330715	0.0457509	0.00320815	0.148269
				Q80WS3	FBLL1_MOUSE	rRNA/tRNA 2'-O-methyltransferase fibrillarin-like protein 1 (EC 2.1.1.-) (Protein-glutamine methyltransferase)	Fbll1	0.292873	-0.0442157	0.0178674	-0.142225	0.129664	-0.16244
				A2RT62	FXL16_MOUSE	F-box/LRR-repeat protein 16 (F-box and leucine-rich repeat protein 16)	Fbxl16	0.0105633	-0.240052	0.156533	0.0772099	0.00597628	0.230965
+			MC_FC	Q9QZN1	FXL17_MOUSE	F-box/LRR-repeat protein 17 (F-box and leucine-rich repeat protein 17) (F-box only protein 13)	Fbxl17	0.00591813	-0.38767	0.246105	0.124386	0.0392191	0.180806
				Q9CZV8	FXL20_MOUSE	F-box/LRR-repeat protein 20 (F-box and leucine-rich repeat protein 20) (F-box/LRR-repeat protein 2-like)	Fbxl20	0.142766	0.138212	0.558124	0.160583	0.854805	-0.0702555
+			MC_FC	Q80UW2	FBX2_MOUSE	F-box only protein 2	Fbxo2	0.00794425	0.237644	0.000563847	-0.214246	0.00243454	-0.190084
				Q6NS60	FBX41_MOUSE	F-box only protein 41	Fbxo41	0.0918853	-0.100429	0.988125	0.00182724	0.981144	0.00235176
				Q920E5	FPPS_MOUSE	Farnesyl pyrophosphate synthase (FPP synthase) (FPS) (EC 2.5.1.10) ((2E,6E)-farnesyl diphosphate synthase) (Cholesterol-regulated 39 kDa protein) (CR 39) (Dimethylallyltranstransferase) (EC 2.5.1.1) (Farnesyl diphosphate synthase) (Geranyltranstransferase)	Fdps	0.0423656	-0.128594	0.38581	0.0440049	0.0508271	0.0603266
				Q9CPW2	FDX2_MOUSE	Ferredoxin-2, mitochondrial (Adrenodoxin-like protein) (Ferredoxin-1-like protein)	Fdx1l	0.0879075	0.268741	0.975531	0.0153058	0.727831	-0.152426
				P22315	HEMH_MOUSE	Ferrochelatase, mitochondrial (EC 4.99.1.1) (Heme synthase) (Protoheme ferro-lyase)	Fech	0.335302	0.0350082	0.136335	-0.0655689	0.902276	0.00762105
				Q8CIB5	FERM2_MOUSE	Fermitin family homolog 2 (Kindlin-2) (Pleckstrin homology domain-containing family C member 1)	Fermt2	0.0921305	0.0888357	0.00657063	-0.157651	0.0327011	-0.0942488
				Q8K0X8	FEZ1_MOUSE	Fasciculation and elongation protein zeta-1 (Zygin I) (Zygin-1)	Fez1	0.148463	0.100971	0.220806	-0.173579	0.114989	-0.275679
				E9PV24	FIBA_MOUSE	Fibrinogen alpha chain [Cleaved into: Fibrinopeptide A; Fibrinogen alpha chain]	Fga	0.0743578	0.1763	0.862057	-0.0431523	0.695039	0.0619323
				Q8K0E8	FIBB_MOUSE	Fibrinogen beta chain [Cleaved into: Fibrinopeptide B; Fibrinogen beta chain]	Fgb	0.266091	0.0822513	0.89122	-0.0474172	0.236618	0.12096
+			MC_FC	P61148	FGF1_MOUSE	Fibroblast growth factor 1 (FGF-1) (Acidic fibroblast growth factor) (aFGF) (Heparin-binding growth factor 1) (HBGF-1)	Fgf1	0.00263529	0.485793	0.401648	-0.0581548	0.00201501	-0.288506
				P61329	FGF12_MOUSE	Fibroblast growth factor 12 (FGF-12) (Fibroblast growth factor homologous factor 1) (FHF-1) (Myocyte-activating factor)	Fgf12	0.0192185	-0.204272	0.130367	-0.128778	0.417468	0.0842879
				P97807	FUMH_MOUSE	Fumarate hydratase, mitochondrial (Fumarase) (EC 4.2.1.2) (EF-3)	Fh	0.15504	0.0585546	0.000420294	-0.127012	0.85515	0.00477409
				A6PWD2	FHAD1_MOUSE	Forkhead-associated domain-containing protein 1 (FHA domain-containing protein 1)	Fhad1	0.0179327	-0.196272	0.585916	0.0362074	0.74949	0.0444331
				P97447	FHL1_MOUSE	Four and a half LIM domains protein 1 (FHL-1) (KyoT) (RBP-associated molecule 14-1) (RAM14-1) (Skeletal muscle LIM-protein 1) (SLIM) (SLIM-1)	Fhl1	0.525138	0.0203421	0.0168649	0.0917408	0.0822966	0.0706193
				Q9CQ92	FIS1_MOUSE	Mitochondrial fission 1 protein (FIS1 homolog) (Tetratricopeptide repeat protein 11) (TPR repeat protein 11)	Fis1	0.59023	0.0148964	0.190539	-0.0313616	0.642258	0.00527763
				Q6P9Q6	FKB15_MOUSE	FK506-binding protein 15 (FKBP-15) (133 kDa FK506-binding protein) (133 kDa FKBP) (FKBP-133) (WASP and FKBP-like) (WAFL)	Fkbp15	0.14087	0.134765	0.701756	-0.0909383	0.630852	-0.126569
				P26883	FKB1A_MOUSE	Peptidyl-prolyl cis-trans isomerase FKBP1A (PPIase FKBP1A) (EC 5.2.1.8) (12 kDa FK506-binding protein) (12 kDa FKBP) (FKBP-12) (Calstabin-1) (FK506-binding protein 1A) (FKBP-1A) (Immunophilin FKBP12) (Rotamase)	Fkbp1a	0.226791	-0.0454273	0.00122473	0.139259	0.00133922	0.12874
				Q9Z2I2	FKB1B_MOUSE	Peptidyl-prolyl cis-trans isomerase FKBP1B (PPIase FKBP1B) (EC 5.2.1.8) (12.6 kDa FK506-binding protein) (12.6 kDa FKBP) (FKBP-12.6) (FK506-binding protein 1B) (FKBP-1B) (Immunophilin FKBP12.6) (Rotamase)	Fkbp1b	0.343364	0.0523491	0.805517	-0.0375297	0.553871	-0.0915453
				P45878	FKBP2_MOUSE	Peptidyl-prolyl cis-trans isomerase FKBP2 (PPIase FKBP2) (EC 5.2.1.8) (13 kDa FK506-binding protein) (13 kDa FKBP) (FKBP-13) (FK506-binding protein 2) (FKBP-2) (Immunophilin FKBP13) (Rotamase)	Fkbp2	0.164225	0.059509	0.472404	0.0225632	0.846262	0.00487304
				Q62446	FKBP3_MOUSE	Peptidyl-prolyl cis-trans isomerase FKBP3 (PPIase FKBP3) (EC 5.2.1.8) (25 kDa FK506-binding protein) (25 kDa FKBP) (FKBP-25) (FK506-binding protein 3) (FKBP-3) (Immunophilin FKBP25) (Rapamycin-selective 25 kDa immunophilin) (Rotamase)	Fkbp3	0.0175927	0.164921	0.271687	0.0509124	0.0323852	-0.0917184
				P30416	FKBP4_MOUSE	Peptidyl-prolyl cis-trans isomerase FKBP4 (PPIase FKBP4) (EC 5.2.1.8) (52 kDa FK506-binding protein) (52 kDa FKBP) (FKBP-52) (59 kDa immunophilin) (p59) (FK506-binding protein 4) (FKBP-4) (FKBP59) (HSP-binding immunophilin) (HBI) (Immunophilin FKBP52) (Rotamase) [Cleaved into: Peptidyl-prolyl cis-trans isomerase FKBP4, N-terminally processed]	Fkbp4	0.127189	-0.0704989	0.625826	0.0136957	0.648482	0.0180883
				O35465	FKBP8_MOUSE	Peptidyl-prolyl cis-trans isomerase FKBP8 (PPIase FKBP8) (EC 5.2.1.8) (38 kDa FK506-binding protein) (38 kDa FKBP) (FKBP-38) (mFKBP38) (FK506-binding protein 8) (FKBP-8) (FKBPR38) (Rotamase)	Fkbp8	0.186878	0.0705667	0.677435	0.0446751	0.709158	-0.0293839
				Q8R123	FAD1_MOUSE	FAD synthase (EC 2.7.7.2) (FAD pyrophosphorylase) (FMN adenylyltransferase) (Flavin adenine dinucleotide synthase) [Includes: Molybdenum cofactor biosynthesis protein-like region; FAD synthase region]	Flad1	0.508903	-0.0225394	0.594086	-0.021754	0.544532	0.0352631
				Q9JJ28	FLII_MOUSE	Protein flightless-1 homolog	Flii	0.280703	0.0473351	0.274595	-0.0497582	0.925595	-0.00805545
				Q8BTM8	FLNA_MOUSE	Filamin-A (FLN-A) (Actin-binding protein 280) (ABP-280) (Alpha-filamin) (Endothelial actin-binding protein) (Filamin-1) (Non-muscle filamin)	Flna	0.0660726	-0.101206	0.875603	0.0103621	0.0114983	0.0935073
				Q80X90	FLNB_MOUSE	Filamin-B (FLN-B) (ABP-280-like protein) (Actin-binding-like protein) (Beta-filamin)	Flnb	0.262493	0.0582013	0.805517	0.0447252	0.748848	-0.0348055
				O08917	FLOT1_MOUSE	Flotillin-1	Flot1	0.010555	-0.211494	0.00218215	0.132135	0.0605762	0.0558145
+			MC_FC	Q60634	FLOT2_MOUSE	Flotillin-2 (Epidermal surface antigen) (ESA) (Membrane component chromosome 17 surface marker 1 homolog)	Flot2	0.00802888	-0.230201	0.00583867	0.128673	0.000926707	0.0756731
				Q9JL04	FMN2_MOUSE	Formin-2	Fmn2	0.0682086	-0.148164	0.147495	0.120651	0.202512	0.134832
				Q9JL26	FMNL1_MOUSE	Formin-like protein 1 (Formin-related protein)	Fmnl1	0.046936	0.186459	0.648312	-0.0563736	0.822797	-0.0259211
+			MC_FC	A2APV2	FMNL2_MOUSE	Formin-like protein 2 (Protein Man)	Fmnl2	0.00353684	0.468144	0.423891	-0.0441093	0.105929	-0.150083
				P35922	FMR1_MOUSE	Synaptic functional regulator FMR1 (Fragile X mental retardation protein 1 homolog) (FMRP) (Protein FMR-1) (mFmr1p)	Fmr1	0.343233	-0.0822825	0.698983	-0.121868	0.990736	-0.00450873
				Q9ER35	FN3K_MOUSE	Fructosamine-3-kinase (EC 2.7.1.171) (Protein-psicosamine 3-kinase FN3K) (Protein-ribulosamine 3-kinase FN3K) (EC 2.7.1.172)	Fn3k	0.477233	0.022275	0.0620095	-0.0540261	0.198128	-0.0548158
				Q8K274	KT3K_MOUSE	Ketosamine-3-kinase (EC 2.7.1.172) (Fructosamine-3-kinase-related protein) (FN3K-RP) (FN3K-related protein) (Protein-psicosamine 3-kinase FN3KRP) (EC 2.7.1.-)	Fn3krp	0.845145	-0.00601339	0.0691935	-0.0843232	0.242823	-0.054441
				Q80TY0	FNBP1_MOUSE	Formin-binding protein 1 (Formin-binding protein 17)	Fnbp1	0.076397	0.0978491	0.0690532	-0.0998089	0.0200002	-0.190364
				Q61239	FNTA_MOUSE	Protein farnesyltransferase/geranylgeranyltransferase type-1 subunit alpha (EC 2.5.1.58) (EC 2.5.1.59) (CAAX farnesyltransferase subunit alpha) (FTase-alpha) (Ras proteins prenyltransferase subunit alpha) (Type I protein geranyl-geranyltransferase subunit alpha) (GGTase-I-alpha)	Fnta	0.0233435	0.194308	0.662082	-0.0409255	0.016249	-0.187119
				Q8K2I1	FNTB_MOUSE	Protein farnesyltransferase subunit beta (FTase-beta) (EC 2.5.1.58) (CAAX farnesyltransferase subunit beta) (Ras proteins prenyltransferase subunit beta)	Fntb	0.0182995	0.195601	0.968187	0.00394654	0.846262	0.0155756
				A2AKG8	FOCAD_MOUSE	Focadhesin	Focad	0.805701	0.032691	0.627203	-0.378059	0.173232	-0.606404
				O35409	FOLH1_MOUSE	Glutamate carboxypeptidase 2 (EC 3.4.17.21) (Folate hydrolase 1) (Folylpoly-gamma-glutamate carboxypeptidase) (FGCP) (Glutamate carboxypeptidase II) (GCPII) (Membrane glutamate carboxypeptidase) (mGCP) (N-acetylated-alpha-linked acidic dipeptidase I) (NAALADase I) (Prostate-specific membrane antigen homolog) (Pteroylpoly-gamma-glutamate carboxypeptidase)	Folh1	0.932822	-0.00308895	0.746218	0.0274427	0.46706	0.0554128
				B1AXV0	FRS1L_MOUSE	DOMON domain-containing protein FRRS1L (Ferric-chelate reductase 1-like protein)	Frrs1l	0.355236	0.0775833	0.898613	-0.0472252	0.8002	-0.0560892
				Q91WJ0	FRS3_MOUSE	Fibroblast growth factor receptor substrate 3 (FGFR substrate 3) (FRS2-beta)	Frs3	0.124263	0.216285	0.82359	0.166086	0.87646	0.0907302
				E9Q8I9	FRY_MOUSE	Protein furry homolog	Fry	0.124525	-0.11167	0.998064	-0.00028944	0.902276	-0.0204046
				Q61553	FSCN1_MOUSE	Fascin (Singed-like protein)	Fscn1	0.10234	0.0743256	0.00690722	-0.07197	0.894266	-0.00287533
				Q7TPM6	FSD1_MOUSE	Fibronectin type III and SPRY domain-containing protein 1	Fsd1	0.615978	0.0156927	0.862057	-0.00895452	0.991124	-0.000529289
				Q8BYN5	FSD1L_MOUSE	FSD1-like protein (Coiled-coil domain-containing protein 10) (FSD1 N-terminal-like protein)	Fsd1l	0.201113	0.0765824	0.279776	0.134311	0.669344	0.0558035
				P09528	FRIH_MOUSE	Ferritin heavy chain (Ferritin H subunit) (EC 1.16.3.1) [Cleaved into: Ferritin heavy chain, N-terminally processed]	Fth1	0.019987	0.231946	0.319986	-0.103779	0.148819	-0.12561
				Q8BGW1	FTO_MOUSE	Alpha-ketoglutarate-dependent dioxygenase FTO (Fat mass and obesity-associated protein) (Protein fatso) (U6 small nuclear RNA (2'-O-methyladenosine-N(6)-)-demethylase FTO) (EC 1.14.11.-) (U6 small nuclear RNA N(6)-methyladenosine-demethylase FTO) (EC 1.14.11.-) (mRNA (2'-O-methyladenosine-N(6)-)-demethylase FTO) (m6A(m)-demethylase FTO) (EC 1.14.11.-) (mRNA N(6)-methyladenosine demethylase FTO) (…	Fto	0.103793	-0.0935588	0.0284265	-0.152074	0.553871	-0.136291
				Q91WJ8	FUBP1_MOUSE	Far upstream element-binding protein 1 (FBP) (FUSE-binding protein 1)	Fubp1	0.0724779	-0.110887	0.435234	0.0437875	0.247116	0.10242
				Q9DB70	FUND1_MOUSE	FUN14 domain-containing protein 1	Fundc1	0.460298	-0.0316491	0.277099	-0.0902526	0.900067	-0.0152662
				Q9D6K8	FUND2_MOUSE	FUN14 domain-containing protein 2 (Hepatitis C virus core-binding protein 6)	Fundc2	0.83984	0.00627422	0.0498369	-0.124745	0.0283036	-0.12053
				Q8R2K1	FUCM_MOUSE	Fucose mutarotase (EC 5.1.3.29)	Fuom	0.0999897	-0.117078	0.540702	0.0784874	0.2447	0.104856
				P56959	FUS_MOUSE	RNA-binding protein FUS (Protein pigpen)	Fus	0.0477432	-0.114095	0.0122148	0.0740263	0.0470979	0.0618653
				Q61584	FXR1_MOUSE	Fragile X mental retardation syndrome-related protein 1 (mFxr1p)	Fxr1	0.291487	0.0490265	0.298686	0.116796	0.609681	-0.0706041
				Q9WVR4	FXR2_MOUSE	Fragile X mental retardation syndrome-related protein 2	Fxr2	0.182286	0.0620158	0.824126	-0.0103157	0.522508	-0.0337737
+			MC_FC	Q9D164	FXYD6_MOUSE	FXYD domain-containing ion transport regulator 6 (PLM-like protein) (Phosphohippolin)	Fxyd6	0.00373333	-0.458701	0.00699754	0.212622	0.0458065	0.126404
				Q8VDC1	FYCO1_MOUSE	FYVE and coiled-coil domain-containing protein 1	Fyco1	0.632688	-0.0220401	0.527474	0.0970049	0.752965	-0.0559618
				Q91Z49	UIF_MOUSE	UAP56-interacting factor (Forty-two-three domain-containing protein 1) (Protein 40-2-3)	Fyttd1	0.0503619	0.197845	0.810127	-0.158778	0.701259	0.107358
				P97855	G3BP1_MOUSE	Ras GTPase-activating protein-binding protein 1 (G3BP-1) (EC 3.6.4.12) (EC 3.6.4.13) (ATP-dependent DNA helicase VIII) (GAP SH3 domain-binding protein 1) (HDH-VIII)	G3bp1	0.174252	0.0622776	0.100507	0.104942	0.481765	-0.0400579
				P97379	G3BP2_MOUSE	Ras GTPase-activating protein-binding protein 2 (G3BP-2) (GAP SH3 domain-binding protein 2)	G3bp2	0.139886	0.0673347	0.961938	0.00311136	0.180407	-0.063755
				Q00612	G6PD1_MOUSE	Glucose-6-phosphate 1-dehydrogenase X (G6PD) (EC 1.1.1.49)	G6pdx	0.0260263	0.159238	0.00282586	-0.13154	0.0801217	-0.0764217
				P70699	LYAG_MOUSE	Lysosomal alpha-glucosidase (EC 3.2.1.20) (Acid maltase)	Gaa	0.010793	-0.240189	0.0551495	0.121957	0.0289262	0.1231
				Q9QYY0	GAB1_MOUSE	GRB2-associated-binding protein 1 (GRB2-associated binder 1) (Growth factor receptor bound protein 2-associated protein 1)	Gab1	0.131427	0.082783	0.333063	-0.0805445	0.635464	-0.0375786
				P60521	GBRL2_MOUSE	Gamma-aminobutyric acid receptor-associated protein-like 2 (GABA(A) receptor-associated protein-like 2) (Golgi-associated ATPase enhancer of 16 kDa) (GATE-16)	Gabarapl2	0.576495	-0.0165076	0.971356	-0.00177288	0.886773	-0.00910115
+			MC_FC	Q9WV18	GABR1_MOUSE	Gamma-aminobutyric acid type B receptor subunit 1 (GABA-B receptor 1) (GABA-B-R1) (GABA-BR1) (GABABR1) (Gb1)	Gabbr1	0.00203636	-0.466607	0.18019	0.0654957	0.00274713	0.174749
+			MC_FC	Q80T41	GABR2_MOUSE	Gamma-aminobutyric acid type B receptor subunit 2 (GABA-B receptor 2) (GABA-B-R2) (GABA-BR2) (GABABR2) (Gb2) (G-protein coupled receptor 51)	Gabbr2	0.00346392	-0.439734	0.0619264	0.0674646	0.0198842	0.144842
				P62812	GBRA1_MOUSE	Gamma-aminobutyric acid receptor subunit alpha-1 (GABA(A) receptor subunit alpha-1)	Gabra1	0.152484	0.0645676	0.651165	-0.0194914	0.919824	-0.00345159
				P63137	GBRB2_MOUSE	Gamma-aminobutyric acid receptor subunit beta-2 (GABA(A) receptor subunit beta-2)	Gabrb2	0.257744	-0.0602834	0.189497	-0.191881	0.125603	-0.0772555
				P22723	GBRG2_MOUSE	Gamma-aminobutyric acid receptor subunit gamma-2 (GABA(A) receptor subunit gamma-2)	Gabrg2	0.181044	-0.0774882	0.375694	-0.109285	0.933836	-0.00706315
				P48318	DCE1_MOUSE	Glutamate decarboxylase 1 (EC 4.1.1.15) (67 kDa glutamic acid decarboxylase) (GAD-67) (Glutamate decarboxylase 67 kDa isoform)	Gad1	0.152434	-0.0607319	0.0979054	0.0361309	0.00139848	0.141229
+			MC_FC	P48320	DCE2_MOUSE	Glutamate decarboxylase 2 (EC 4.1.1.15) (65 kDa glutamic acid decarboxylase) (GAD-65) (Glutamate decarboxylase 65 kDa isoform)	Gad2	0.00791667	-0.234741	5.28412e-06	0.357009	0.000246687	0.272915
				Q99KY4	GAK_MOUSE	Cyclin-G-associated kinase (EC 2.7.11.1)	Gak	0.826333	-0.00576353	0.0985034	0.0891147	0.120514	0.0521665
				Q8R059	GALE_MOUSE	UDP-glucose 4-epimerase (EC 5.1.3.2) (Galactowaldenase) (UDP-N-acetylglucosamine 4-epimerase) (UDP-GlcNAc 4-epimerase) (EC 5.1.3.7) (UDP-galactosamine 4-epimerase) (UDP-GalNAc 4-epimerase) (UDP-galactose 4-epimerase)	Gale	0.15997	0.100883	0.0605022	0.299298	0.165508	0.122494
				Q9R0N0	GALK1_MOUSE	Galactokinase (EC 2.7.1.6) (Galactose kinase)	Galk1	0.391738	0.0336602	0.461163	-0.0712662	0.0433682	-0.107593
				Q8C7U7	GALT6_MOUSE	Polypeptide N-acetylgalactosaminyltransferase 6 (EC 2.4.1.41) (Polypeptide GalNAc transferase 6) (GalNAc-T6) (pp-GaNTase 6) (Protein-UDP acetylgalactosaminyltransferase 6) (UDP-GalNAc:polypeptide N-acetylgalactosaminyltransferase 6)	Galnt6	0.113407	-0.160243	0.59736	-0.193993	0.0115174	0.507101
				O35969	GAMT_MOUSE	Guanidinoacetate N-methyltransferase (EC 2.1.1.2)	Gamt	0.057759	0.121201	0.99267	0.000997543	0.558855	0.0604868
				Q8BHN3	GANAB_MOUSE	Neutral alpha-glucosidase AB (EC 3.2.1.207) (Alpha-glucosidase 2) (Glucosidase II subunit alpha)	Ganab	0.497301	-0.0199671	0.330223	0.0225654	0.50806	0.0219398
+			MC_FC	P06837	NEUM_MOUSE	Neuromodulin (Axonal membrane protein GAP-43) (Calmodulin-binding protein P-57) (Growth-associated protein 43)	Gap43	0.0032	-0.396366	0.00017074	0.2725	0.00118322	0.244433
				P16858	G3P_MOUSE	Glyceraldehyde-3-phosphate dehydrogenase (GAPDH) (EC 1.2.1.12) (Peptidyl-cysteine S-nitrosylase GAPDH) (EC 2.6.99.-)	Gapdh	0.26138	0.0377216	0.0258619	-0.0333838	0.0016675	0.043119
				Q6PAR5	GAPD1_MOUSE	GTPase-activating protein and VPS9 domain-containing protein 1 (GAPex-5) (Rab5-activating protein 6)	Gapvd1	0.854378	0.00577497	0.790885	0.0299129	0.656312	-0.0330174
				Q9CZD3	GARS_MOUSE	Glycine--tRNA ligase (EC 6.1.1.14) (Diadenosine tetraphosphate synthetase) (Ap4A synthetase) (EC 2.7.7.-) (Glycyl-tRNA synthetase 1) (GlyRS)	Gars	0.0376388	0.136241	0.0932367	-0.0629115	0.0306642	-0.0950484
				Q64737	PUR2_MOUSE	Trifunctional purine biosynthetic protein adenosine-3 [Includes: Phosphoribosylamine--glycine ligase (EC 6.3.4.13) (Glycinamide ribonucleotide synthetase) (GARS) (Phosphoribosylglycinamide synthetase); Phosphoribosylformylglycinamidine cyclo-ligase (EC 6.3.3.1) (AIR synthase) (AIRS) (Phosphoribosyl-aminoimidazole synthetase); Phosphoribosylglycinamide formyltransferase (EC 2.1.2.2) (5'-phosphorib…	Gart	0.347433	-0.0310621	0.221716	0.0393558	0.843137	0.0056839
				Q60780	GAS7_MOUSE	Growth arrest-specific protein 7 (GAS-7)	Gas7	0.944697	-0.00301933	0.366672	0.120602	0.21376	0.173287
				Q8CAB8	CAST2_MOUSE	Cytosolic arginine sensor for mTORC1 subunit 2 (GATS-like protein 2)	Gatsl2	0.315434	0.0569541	0.0351214	0.164368	0.305628	-0.158806
				Q69ZF3	GBA2_MOUSE	Non-lysosomal glucosylceramidase (NLGase) (EC 3.2.1.45) (Beta-glucocerebrosidase 2) (Beta-glucosidase 2) (Bile acid beta-glucosidase GBA2) (Bile acid glucosyl transferase GBA2) (Cholesterol glucosyltransferase GBA2) (EC 2.4.1.-) (Cholesteryl-beta-glucosidase GBA2) (EC 3.2.1.-) (Glucosylceramidase 2)	Gba2	0.144033	0.0640168	0.455601	0.0434909	0.804255	0.0116849
				O55126	NIPS2_MOUSE	Protein NipSnap homolog 2 (NipSnap2) (Glioblastoma-amplified sequence)	Gbas	0.61342	0.0142484	0.225295	-0.0266042	0.37425	0.0156145
				Q9D6Y9	GLGB_MOUSE	1,4-alpha-glucan-branching enzyme (EC 2.4.1.18) (Brancher enzyme) (Glycogen-branching enzyme)	Gbe1	0.264452	0.0692363	0.90256	-0.0202854	0.362765	-0.0933321
				P21614	VTDB_MOUSE	Vitamin D-binding protein (DBP) (VDB) (Gc-globulin) (Group-specific component)	Gc	0.462403	-0.0586784	0.130664	-0.35628	0.314009	-0.264631
				O88986	KBL_MOUSE	2-amino-3-ketobutyrate coenzyme A ligase, mitochondrial (AKB ligase) (EC 2.3.1.29) (Aminoacetone synthase) (Glycine acetyltransferase)	Gcat	0.179305	0.0808413	0.948845	-0.0196366	0.351583	-0.083946
				Q60759	GCDH_MOUSE	Glutaryl-CoA dehydrogenase, mitochondrial (GCD) (EC 1.3.8.6)	Gcdh	0.311492	0.0464997	0.0850243	-0.14651	0.296532	0.0808027
				P97494	GSH1_MOUSE	Glutamate--cysteine ligase catalytic subunit (EC 6.3.2.2) (GCS heavy chain) (Gamma-ECS) (Gamma-glutamylcysteine synthetase)	Gclc	0.298882	0.0480645	0.494408	-0.0450828	0.846262	-0.0138443
				O09172	GSH0_MOUSE	Glutamate--cysteine ligase regulatory subunit (GCS light chain) (Gamma-ECS regulatory subunit) (Gamma-glutamylcysteine synthetase regulatory subunit) (Glutamate--cysteine ligase modifier subunit)	Gclm	0.0260842	0.161559	0.0137777	-0.0817051	0.135671	-0.0809364
				E9PVA8	GCN1_MOUSE	eIF-2-alpha kinase activator GCN1 (GCN1 eIF-2-alpha kinase activator homolog) (GCN1-like protein 1) (General control of amino-acid synthesis 1-like protein 1) (Translational activator GCN1)	Gcn1l1	0.0363658	-0.129013	0.0240588	0.0561841	0.0915593	0.0650425
+			MC_FC	Q91WK5	GCSH_MOUSE	Glycine cleavage system H protein, mitochondrial (Lipoic acid-containing protein)	Gcsh	0.0102889	0.244984	0.0957499	-0.0826945	0.0334381	-0.129886
+			MC_FC	Q9R111	GUAD_MOUSE	Guanine deaminase (Guanase) (Guanine aminase) (EC 3.5.4.3) (Guanine aminohydrolase) (GAH)	Gda	0.00364228	-0.375881	0.000159222	0.254911	0.000277411	0.37274
				O88741	GDAP1_MOUSE	Ganglioside-induced differentiation-associated protein 1 (GDAP1)	Gdap1	0.832735	-0.00578976	0.00247452	-0.0880637	0.553871	0.0197506
				Q8VE33	GD1L1_MOUSE	Ganglioside-induced differentiation-associated protein 1-like 1 (GDAP1-L1)	Gdap1l1	0.80814	-0.00641251	0.487154	0.0281994	0.417896	0.0298324
				Q9JL56	GDE1_MOUSE	Glycerophosphodiester phosphodiesterase 1 (Glycerophosphoinositol glycerophosphodiesterase GDE1) (EC 3.1.4.44) (Lysophospholipase D GDE1) (EC 3.1.4.-) (Membrane-interacting protein of RGS16)	Gde1	0.204355	-0.0494716	0.99267	-0.00211596	0.357599	-0.04426
				P50396	GDIA_MOUSE	Rab GDP dissociation inhibitor alpha (Rab GDI alpha) (Guanosine diphosphate dissociation inhibitor 1) (GDI-1)	Gdi1	0.218232	-0.0461202	0.0117119	0.0391979	0.963772	-0.00114441
				Q61598	GDIB_MOUSE	Rab GDP dissociation inhibitor beta (Rab GDI beta) (GDI-3) (Guanosine diphosphate dissociation inhibitor 2) (GDI-2)	Gdi2	0.831168	-0.00625324	0.472404	0.0321417	0.992928	-0.000441074
				Q9CRY7	GDPD1_MOUSE	Lysophospholipase D GDPD1 (EC 3.1.4.-) (Glycerophosphodiester phosphodiesterase 4) (Glycerophosphodiester phosphodiesterase domain-containing protein 1)	Gdpd1	0.262561	-0.04672	0.331078	0.0590923	0.884959	-0.00660729
				Q3TLS3	GDPP1_MOUSE	GDP-D-glucose phosphorylase 1 (EC 2.7.7.78)	Gdpgp1	0.0723769	0.141595	0.439369	-0.150057	0.27416	-0.155482
+	+	+	MC_FC;FN_FC;MN_MC	P03995	GFAP_MOUSE	Glial fibrillary acidic protein (GFAP)	Gfap	0	-0.619916	7.0356e-07	0.83237	3.01557e-05	0.748683
				Q8K0D5	EFGM_MOUSE	Elongation factor G, mitochondrial (EF-Gmt) (Elongation factor G 1, mitochondrial) (mEF-G 1) (Elongation factor G1)	Gfm1	0.0346522	0.176645	0.344085	-0.110807	0.314126	-0.06638
				Q3UHD2	GFOD1_MOUSE	Glucose-fructose oxidoreductase domain-containing protein 1 (EC 1.-.-.-)	Gfod1	0.0943599	-0.129866	0.979868	-0.00543022	0.612787	-0.0605166
				P47856	GFPT1_MOUSE	Glutamine--fructose-6-phosphate aminotransferase [isomerizing] 1 (EC 2.6.1.16) (D-fructose-6-phosphate amidotransferase 1) (Glutamine:fructose-6-phosphate amidotransferase 1) (GFAT 1) (GFAT1) (Hexosephosphate aminotransferase 1)	Gfpt1	0.181282	-0.0661454	0.0102167	0.142445	0.335256	0.0653553
+			MC_FC	P97785	GFRA1_MOUSE	GDNF family receptor alpha-1 (GDNF receptor alpha-1) (GDNFR-alpha-1) (GFR-alpha-1) (TGF-beta-related neurotrophic factor receptor 1)	Gfra1	0.00329412	-0.602915	0.00105091	0.232498	0.134003	0.272
				O08842	GFRA2_MOUSE	GDNF family receptor alpha-2 (GDNF receptor alpha-2) (GDNFR-alpha-2) (GFR-alpha-2) (GDNF receptor beta) (GDNFR-beta) (Neurturin receptor alpha) (NRTNR-alpha) (NTNR-alpha) (TGF-beta-related neurotrophic factor receptor 2)	Gfra2	0.0155928	-0.218433	0.0191948	0.250769	0.0616778	0.125945
				Q8R0H9	GGA1_MOUSE	ADP-ribosylation factor-binding protein GGA1 (Gamma-adaptin-related protein 1) (Golgi-localized, gamma ear-containing, ARF-binding protein 1)	Gga1	0.377305	-0.0353956	0.659566	0.0503042	0.830407	-0.0148575
				Q8BMI3	GGA3_MOUSE	ADP-ribosylation factor-binding protein GGA3 (Golgi-localized, gamma ear-containing, ARF-binding protein 3)	Gga3	0.849118	0.005548	0.560945	-0.0226271	0.941159	0.00452876
				Q9D7X8	GGCT_MOUSE	Gamma-glutamylcyclotransferase (EC 4.3.2.9)	Ggct	0.343434	0.0399456	0.15547	-0.11081	0.0355129	-0.0647764
				Q9WTN0	GGPPS_MOUSE	Geranylgeranyl pyrophosphate synthase (GGPP synthase) (GGPPSase) (EC 2.5.1.-) ((2E,6E)-farnesyl diphosphate synthase) (Dimethylallyltranstransferase) (EC 2.5.1.1) (Farnesyl diphosphate synthase) (Farnesyltranstransferase) (EC 2.5.1.29) (Geranylgeranyl diphosphate synthase) (Geranyltranstransferase) (EC 2.5.1.10)	Ggps1	0.0577821	0.114371	0.0372268	0.0638204	0.247155	-0.0452003
				Q99JP7	GGT7_MOUSE	Glutathione hydrolase 7 (EC 3.4.19.13) (Gamma-glutamyltransferase 7) (GGT 7) (EC 2.3.2.2) (Gamma-glutamyltransferase-like 3) (Gamma-glutamyltranspeptidase 7) [Cleaved into: Glutathione hydrolase 7 heavy chain; Glutathione hydrolase 7 light chain]	Ggt7	0.385209	-0.0332656	0.420336	-0.0535603	0.257165	0.0578959
+			MC_FC	Q91VC9	GHITM_MOUSE	Growth hormone-inducible transmembrane protein (Mitochondrial morphology and cristae structure 1) (MICS1)	Ghitm	0.00367213	0.340876	0.00595203	-0.279575	0.000749849	-0.233586
				Q9Z0G0	GIPC1_MOUSE	PDZ domain-containing protein GIPC1 (GAIP C-terminus-interacting protein) (RGS-GAIP-interacting protein) (RGS19-interacting protein 1) (SemaF cytoplasmic domain-associated protein 1) (SEMCAP-1) (Synectin)	Gipc1	0.10738	0.0817351	0.916422	0.00746965	0.479292	-0.0339985
				Q68FF6	GIT1_MOUSE	ARF GTPase-activating protein GIT1 (ARF GAP GIT1) (G protein-coupled receptor kinase-interactor 1) (GRK-interacting protein 1)	Git1	0.764807	-0.00914335	0.996819	0.000594378	0.235115	0.0347528
				P23242	CXA1_MOUSE	Gap junction alpha-1 protein (Connexin-43) (Cx43) (Gap junction 43 kDa heart protein)	Gja1	0.973771	0.00115967	0.998064	-0.000267982	0.131111	0.0866475
+			MC_FC	Q921C1	CXG3_MOUSE	Gap junction gamma-3 protein (Connexin-29) (Cx29) (Gap junction epsilon-1 protein)	Gjc3	0.00355556	0.347623	0.126368	-0.0840824	0.0995008	-0.0638235
				Q64516	GLPK_MOUSE	Glycerol kinase (GK) (Glycerokinase) (EC 2.7.1.30) (ATP:glycerol 3-phosphotransferase)	Gk	0.0168075	0.173436	2.68848e-05	-0.230231	0.00276442	-0.141997
				Q61543	GSLG1_MOUSE	Golgi apparatus protein 1 (E-selectin ligand 1) (ESL-1) (Selel) (Golgi sialoglycoprotein MG-160)	Glg1	0.366198	0.0311329	0.959014	0.00191474	0.278244	-0.0415065
				Q9CYL5	GAPR1_MOUSE	Golgi-associated plant pathogenesis-related protein 1 (GAPR-1) (Golgi-associated PR-1 protein) (Glioma pathogenesis-related protein 2) (GliPR 2)	Glipr2	0.0556526	-0.144898	0.0700412	0.380359	0.436496	0.154744
+			MC_FC	Q9CPU0	LGUL_MOUSE	Lactoylglutathione lyase (EC 4.4.1.5) (Aldoketomutase) (Glyoxalase I) (Glx I) (Ketone-aldehyde mutase) (Methylglyoxalase) (S-D-lactoylglutathione methylglyoxal lyase)	Glo1	0.00803252	0.272879	0.718246	0.0186558	0.017624	-0.101619
				Q9CPV4	GLOD4_MOUSE	Glyoxalase domain-containing protein 4	Glod4	0.299525	0.0364442	0.289524	-0.0209799	0.445095	-0.0159578
				Q9QUH0	GLRX1_MOUSE	Glutaredoxin-1 (Thioltransferase-1) (TTase-1)	Glrx	0.0564018	0.110842	0.00911777	-0.118381	0.00695742	-0.184681
				Q9CQM9	GLRX3_MOUSE	Glutaredoxin-3 (PKC-interacting cousin of thioredoxin) (PICOT) (PKC-theta-interacting protein) (PKCq-interacting protein) (Thioredoxin-like protein 2)	Glrx3	0.0178545	0.165149	0.100948	-0.0451555	0.00239317	-0.110542
				Q80Y14	GLRX5_MOUSE	Glutaredoxin-related protein 5, mitochondrial (Monothiol glutaredoxin-5)	Glrx5	0.0108293	0.202593	0.130664	-0.0767312	0.0286656	-0.0684216
				D3Z7P3	GLSK_MOUSE	Glutaminase kidney isoform, mitochondrial (GLS) (EC 3.5.1.2) [Cleaved into: Glutaminase kidney isoform, mitochondrial 68 kDa chain; Glutaminase kidney isoform, mitochondrial 65 kDa chain]	Gls	0.744843	0.00832891	0.0418102	-0.0705976	0.843753	-0.00194359
+			MC_FC	Q9JL62	GLTP_MOUSE	Glycolipid transfer protein (GLTP)	Gltp	0.00180645	0.496139	0.00374732	-0.126159	0.00153777	-0.259887
				P26443	DHE3_MOUSE	Glutamate dehydrogenase 1, mitochondrial (GDH 1) (EC 1.4.1.3)	Glud1	0.165248	-0.0514069	0.0439036	-0.0348845	0.815597	0.00298834
				P15105	GLNA_MOUSE	Glutamine synthetase (GS) (EC 6.3.1.2) (Glutamate--ammonia ligase) (Palmitoyltransferase GLUL) (EC 2.3.1.225)	Glul	0.0189176	0.150582	0.000116966	-0.110634	0.00255963	-0.0694752
				A2AJA9	AJM1_MOUSE	Apical junction component 1 homolog	Gm996	0.438302	0.0349946	0.971356	0.00685835	0.973758	-0.00377822
				Q8K0C9	GMDS_MOUSE	GDP-mannose 4,6 dehydratase (EC 4.2.1.47) (GDP-D-mannose dehydratase) (GMD)	Gmds	0.0725661	-0.113754	0.928132	0.0120969	0.54091	0.0455437
				Q9CQI3	GMFB_MOUSE	Glia maturation factor beta (GMF-beta)	Gmfb	0.046683	-0.109967	0.200729	0.0469592	0.00632338	0.0690646
				Q8BTZ7	GMPPB_MOUSE	Mannose-1-phosphate guanyltransferase beta (EC 2.7.7.13) (GDP-mannose pyrophosphorylase B) (GTP-mannose-1-phosphate guanylyltransferase beta)	Gmppb	0.185673	-0.0934978	0.875603	0.0148132	0.539365	0.112432
				Q9DCZ1	GMPR1_MOUSE	GMP reductase 1 (GMPR 1) (EC 1.7.1.7) (Guanosine 5'-monophosphate oxidoreductase 1) (Guanosine monophosphate reductase 1)	Gmpr	0.0346104	0.194839	0.826108	-0.0376506	0.301453	-0.0426452
				Q3THK7	GUAA_MOUSE	GMP synthase [glutamine-hydrolyzing] (EC 6.3.5.2) (GMP synthetase) (Glutamine amidotransferase)	Gmps	0.114881	-0.0871377	0.302515	-0.0718904	0.74949	0.0200243
				P21278	GNA11_MOUSE	Guanine nucleotide-binding protein subunit alpha-11 (G alpha-11) (G-protein subunit alpha-11)	Gna11	0.0292601	-0.145932	0.0227856	0.0691905	0.123562	0.0513992
				P27600	GNA12_MOUSE	Guanine nucleotide-binding protein subunit alpha-12 (G alpha-12) (G-protein subunit alpha-12)	Gna12	0.0126022	0.188138	0.904593	-0.0186257	0.0160433	-0.065362
				P27601	GNA13_MOUSE	Guanine nucleotide-binding protein subunit alpha-13 (G alpha-13) (G-protein subunit alpha-13)	Gna13	0.30763	0.0460525	0.778635	0.0229287	0.232127	0.0751724
				B2RSH2	GNAI1_MOUSE	Guanine nucleotide-binding protein G(i) subunit alpha-1 (Adenylate cyclase-inhibiting G alpha protein)	Gnai1	0.196407	-0.0531926	0.972239	-0.00172234	0.0117714	0.15023
				P08752	GNAI2_MOUSE	Guanine nucleotide-binding protein G(i) subunit alpha-2 (Adenylate cyclase-inhibiting G alpha protein)	Gnai2	0.276198	-0.0379887	0.732116	0.0100536	0.91882	-0.0031724
				Q9DC51	GNAI3_MOUSE	Guanine nucleotide-binding protein G(i) subunit alpha (G(i) alpha-3)	Gnai3	0.178175	0.072825	0.343443	-0.0702679	0.12234	-0.113626
				Q8CGK7	GNAL_MOUSE	Guanine nucleotide-binding protein G(olf) subunit alpha (Adenylate cyclase-stimulating G alpha protein, olfactory type)	Gnal	0.87415	-0.0116606	0.939001	-0.0296073	0.107063	0.35691
				P18872	GNAO_MOUSE	Guanine nucleotide-binding protein G(o) subunit alpha	Gnao1	0.0108784	-0.182518	0.000113435	0.0872207	6.87804e-05	0.165176
				P21279	GNAQ_MOUSE	Guanine nucleotide-binding protein G(q) subunit alpha (Guanine nucleotide-binding protein alpha-q)	Gnaq	0.0972839	-0.0746393	0.000735822	0.116682	0.0013787	0.0895944
				P63094	GNAS2_MOUSE	Guanine nucleotide-binding protein G(s) subunit alpha isoforms short (Adenylate cyclase-stimulating G alpha protein)	Gnas	0.525416	0.0201697	0.614623	0.00905371	0.179669	-0.0560508
+			MC_FC	O70443	GNAZ_MOUSE	Guanine nucleotide-binding protein G(z) subunit alpha (G(x) alpha chain) (Gz-alpha)	Gnaz	0.00579394	-0.303473	0.000687061	0.0941963	0.00162744	0.21187
				P62874	GBB1_MOUSE	Guanine nucleotide-binding protein G(I)/G(S)/G(T) subunit beta-1 (Transducin beta chain 1)	Gnb1	0.0194926	-0.164303	0.0240824	0.0344591	0.0117621	0.115222
				P62880	GBB2_MOUSE	Guanine nucleotide-binding protein G(I)/G(S)/G(T) subunit beta-2 (G protein subunit beta-2) (Transducin beta chain 2)	Gnb2	0.129262	-0.0608335	0.000469792	0.0581684	0.00678278	0.0756388
				P68040	RACK1_MOUSE	Receptor of activated protein C kinase 1 (12-3) (Guanine nucleotide-binding protein subunit beta-2-like 1) (Receptor for activated C kinase) (Receptor of activated protein kinase C 1) (p205) [Cleaved into: Receptor of activated protein C kinase 1, N-terminally processed (Guanine nucleotide-binding protein subunit beta-2-like 1, N-terminally processed)]	Gnb2l1	0.116635	0.0766864	0.486935	-0.0274611	0.0169994	-0.0727539
+			MC_FC	P29387	GBB4_MOUSE	Guanine nucleotide-binding protein subunit beta-4 (Transducin beta chain 4)	Gnb4	0.00780822	0.309955	0.0785282	0.134005	0.208624	-0.177947
				P62881	GNB5_MOUSE	Guanine nucleotide-binding protein subunit beta-5 (Gbeta5) (Transducin beta chain 5)	Gnb5	0.0884073	-0.0854015	0.820692	-0.00789452	0.0036581	0.121475
+			MC_FC	P61953	GBG11_MOUSE	Guanine nucleotide-binding protein G(I)/G(S)/G(O) subunit gamma-11	Gng11	0.00186667	0.632949	0.246105	-0.0981483	0.00590134	-0.401063
				Q9DAS9	GBG12_MOUSE	Guanine nucleotide-binding protein G(I)/G(S)/G(O) subunit gamma-12	Gng12	0.0104191	0.20821	0.0183743	-0.0997674	0.00195178	-0.0887764
				Q9JMF3	GBG13_MOUSE	Guanine nucleotide-binding protein G(I)/G(S)/G(O) subunit gamma-13	Gng13	0.0381818	-0.196641	0.0385209	-0.182932	0.484887	0.0837462
+			MC_FC	P63213	GBG2_MOUSE	Guanine nucleotide-binding protein G(I)/G(S)/G(O) subunit gamma-2 (G gamma-I)	Gng2	0.00463448	-0.30536	6.96823e-05	0.196376	0.000441225	0.128551
				P63216	GBG3_MOUSE	Guanine nucleotide-binding protein G(I)/G(S)/G(O) subunit gamma-3	Gng3	0.074301	-0.119196	0.962681	-0.00463963	0.123959	0.116457
+			MC_FC	P50153	GBG4_MOUSE	Guanine nucleotide-binding protein G(I)/G(S)/G(O) subunit gamma-4	Gng4	0.00308257	-0.455888	0.0895502	0.134897	0.00276442	0.182282
				Q80SZ7	GBG5_MOUSE	Guanine nucleotide-binding protein G(I)/G(S)/G(O) subunit gamma-5	Gng5	0.152141	0.0735548	0.384024	-0.0339444	0.468298	0.0417006
				Q61016	GBG7_MOUSE	Guanine nucleotide-binding protein G(I)/G(S)/G(O) subunit gamma-7	Gng7	0.163825	-0.0743506	0.638036	0.050257	0.0101925	0.220992
+			MC_FC	P63078	GBG8_MOUSE	Guanine nucleotide-binding protein G(I)/G(S)/G(O) subunit gamma-8 (Gamma-9)	Gng8	0	-1.12175	0.30317	0.191512	0.0376864	0.40753
				P36916	GNL1_MOUSE	Guanine nucleotide-binding protein-like 1 (GTP-binding protein MMR1)	Gnl1	0.198708	0.0509391	0.0523459	0.0615292	0.639672	0.0163169
				O88958	GNPI1_MOUSE	Glucosamine-6-phosphate isomerase 1 (EC 3.5.99.6) (Glucosamine-6-phosphate deaminase 1) (GNPDA 1) (GlcN6P deaminase 1) (Oscillin)	Gnpda1	0.0849207	-0.122018	0.514884	0.0607424	0.484887	0.0477424
				Q9CRC9	GNPI2_MOUSE	Glucosamine-6-phosphate isomerase 2 (EC 3.5.99.6) (Glucosamine-6-phosphate deaminase 2) (GNPDA 2) (GlcN6P deaminase 2)	Gnpda2	0.478817	-0.0241065	0.971356	0.00266671	0.973758	0.00246954
				Q8BFR4	GNS_MOUSE	N-acetylglucosamine-6-sulfatase (EC 3.1.6.14) (Glucosamine-6-sulfatase) (G6S)	Gns	0.299396	-0.0448203	0.268141	0.106134	0.367814	0.0680737
				P55937	GOGA3_MOUSE	Golgin subfamily A member 3 (Golgin-160) (Male-enhanced antigen 2) (MEA-2)	Golga3	0.291177	0.0537181	0.548467	0.05668	0.51748	0.0731642
				Q91W53	GOGA7_MOUSE	Golgin subfamily A member 7	Golga7	0.269884	0.107826	0.767718	-0.0980301	0.902276	0.0482767
				Q9CRA5	GOLP3_MOUSE	Golgi phosphoprotein 3 (Coat protein GPP34)	Golph3	0.0837939	0.104367	0.614623	0.0296428	0.712764	-0.0262642
				Q99JX3	GORS2_MOUSE	Golgi reassembly-stacking protein 2 (GRS2) (Golgi reassembly-stacking protein of 55 kDa) (GRASP55)	Gorasp2	0.0831348	0.107476	0.484214	-0.0542934	0.447088	-0.0415676
				P05201	AATC_MOUSE	Aspartate aminotransferase, cytoplasmic (cAspAT) (EC 2.6.1.1) (EC 2.6.1.3) (Cysteine aminotransferase, cytoplasmic) (Cysteine transaminase, cytoplasmic) (cCAT) (Glutamate oxaloacetate transaminase 1) (Transaminase A)	Got1	0.0774071	0.0820394	7.04186e-05	-0.116134	0.00744652	-0.0527573
				P05202	AATM_MOUSE	Aspartate aminotransferase, mitochondrial (mAspAT) (EC 2.6.1.1) (EC 2.6.1.7) (Fatty acid-binding protein) (FABP-1) (Glutamate oxaloacetate transaminase 2) (Kynurenine aminotransferase 4) (Kynurenine aminotransferase IV) (Kynurenine--oxoglutarate transaminase 4) (Kynurenine--oxoglutarate transaminase IV) (Plasma membrane-associated fatty acid-binding protein) (FABPpm) (Transaminase A)	Got2	0.299031	0.035533	0.000178946	-0.179071	0.0465924	-0.0424318
				Q9QZF2	GPC1_MOUSE	Glypican-1 [Cleaved into: Secreted glypican-1]	Gpc1	0.0595243	-0.149591	0.991566	0.00135779	0.0274368	0.258941
+			MC_FC	P13707	GPDA_MOUSE	Glycerol-3-phosphate dehydrogenase [NAD(+)], cytoplasmic (GPD-C) (GPDH-C) (EC 1.1.1.8)	Gpd1	0.0014359	0.501694	0.00239278	-0.301627	0.000100444	-0.264861
				Q3ULJ0	GPD1L_MOUSE	Glycerol-3-phosphate dehydrogenase 1-like protein (EC 1.1.1.8)	Gpd1l	0.0394989	-0.129124	0.325001	0.030705	0.0240478	0.0855322
				Q64521	GPDM_MOUSE	Glycerol-3-phosphate dehydrogenase, mitochondrial (GPD-M) (GPDH-M) (EC 1.1.5.3) (Protein TISP38)	Gpd2	0.0349676	0.11927	0.000411434	-0.0936446	4.8681e-05	-0.0965433
				Q8BUV3	GEPH_MOUSE	Gephyrin [Includes: Molybdopterin adenylyltransferase (MPT adenylyltransferase) (EC 2.7.7.75) (Domain G); Molybdopterin molybdenumtransferase (MPT Mo-transferase) (EC 2.10.1.1) (Domain E)]	Gphn	0.0681531	0.0981188	0.145122	-0.0368929	0.062736	-0.0579605
				P06745	G6PI_MOUSE	Glucose-6-phosphate isomerase (GPI) (EC 5.3.1.9) (Autocrine motility factor) (AMF) (Neuroleukin) (NLK) (Phosphoglucose isomerase) (PGI) (Phosphohexose isomerase) (PHI)	Gpi	0.0798332	-0.0856748	0.0284673	0.0408783	0.025985	0.0519571
+			MC_FC	P35802	GPM6A_MOUSE	Neuronal membrane glycoprotein M6-a (M6a)	Gpm6a	0.00561074	-0.360896	0.0247495	0.0967474	0.00167585	0.241452
				P35803	GPM6B_MOUSE	Neuronal membrane glycoprotein M6-b (M6b)	Gpm6b	0.915153	0.00303793	0.0725223	-0.06533	0.0115174	0.186264
				Q8C419	GP158_MOUSE	Probable G-protein coupled receptor 158	Gpr158	0.0362742	-0.150753	0.00468231	0.126372	0.00156105	0.312785
+			MC_FC	Q9QY42	GPR37_MOUSE	Prosaposin receptor GPR37 (G-protein coupled receptor 37)	Gpr37	0.0109153	0.271811	0.186379	-0.102509	0.181694	-0.141788
				Q99JG2	G37L1_MOUSE	G-protein coupled receptor 37-like 1 (Endothelin B receptor-like protein 2) (ETBR-LP-2)	Gpr37l1	0.605273	0.0179253	0.00109424	-0.347544	0.00683935	-0.181717
				Q5U4C1	GASP1_MOUSE	G-protein coupled receptor-associated sorting protein 1 (GASP-1)	Gprasp1	0.0888747	-0.22579	0.533097	0.254977	0.801781	0.100966
				Q923Z0	GPC5B_MOUSE	G-protein coupled receptor family C group 5 member B (Retinoic acid-induced gene 2 protein) (RAIG-2)	Gprc5b	0.0695404	0.152958	0.434425	0.103207	0.377972	0.106907
+			MC_FC	Q3UNH4	GRIN1_MOUSE	G protein-regulated inducer of neurite outgrowth 1 (GRIN1)	Gprin1	0.00365217	-0.42115	0.0214507	0.113595	0.00275441	0.163401
				Q99LD4	CSN1_MOUSE	COP9 signalosome complex subunit 1 (SGN1) (Signalosome subunit 1) (G protein pathway suppressor 1) (GPS-1) (JAB1-containing signalosome subunit 1)	Gps1	0.102162	-0.0760489	0.122793	-0.052227	0.466178	-0.0236475
				Q6IR34	GPSM1_MOUSE	G-protein-signaling modulator 1 (Activator of G-protein signaling 3)	Gpsm1	0.0615932	0.109427	0.148396	0.0529835	0.233165	-0.0693502
				Q8VDU0	GPSM2_MOUSE	G-protein-signaling modulator 2 (Pins homolog)	Gpsm2	0.661326	-0.0146587	0.0765969	0.184963	0.18428	0.140048
				P11352	GPX1_MOUSE	Glutathione peroxidase 1 (GPx-1) (GSHPx-1) (EC 1.11.1.9) (Cellular glutathione peroxidase) (Selenium-dependent glutathione peroxidase 1)	Gpx1	0.0346538	-0.150147	0.0328499	-0.0958869	0.312887	-0.0497472
				O70325	GPX4_MOUSE	Phospholipid hydroperoxide glutathione peroxidase (PHGPx) (EC 1.11.1.12) (Glutathione peroxidase 4) (GPx-4) (GSHPx-4)	Gpx4	0.0194257	0.166998	0.0548107	-0.0941534	0.00179436	-0.118308
				Q60760	GRB10_MOUSE	Growth factor receptor-bound protein 10 (GRB10 adapter protein) (Maternally expressed gene 1 protein)	Grb10	0.250892	-0.131454	0.358293	0.229683	0.958997	0.0292795
				Q60631	GRB2_MOUSE	Growth factor receptor-bound protein 2 (Adapter protein GRB2) (SH2/SH3 adapter GRB2)	Grb2	0.232439	-0.0490742	0.0549159	0.0492916	0.959877	0.00276566
				O35127	C10_MOUSE	Protein C10	Grcc10	0.234675	-0.0588267	0.996819	0.000763655	0.72655	0.0292037
				Q91Z53	GRHPR_MOUSE	Glyoxylate reductase/hydroxypyruvate reductase (EC 1.1.1.79) (EC 1.1.1.81)	Grhpr	0.175275	0.0525746	0.0191948	-0.0910063	0.311118	-0.0330234
				P23818	GRIA1_MOUSE	Glutamate receptor 1 (GluR-1) (AMPA-selective glutamate receptor 1) (GluR-A) (GluR-K1) (Glutamate receptor ionotropic, AMPA 1) (GluA1)	Gria1	0.595891	-0.0232012	0.774116	0.0389836	0.34413	0.0848567
				P23819	GRIA2_MOUSE	Glutamate receptor 2 (GluR-2) (AMPA-selective glutamate receptor 2) (GluR-B) (GluR-K2) (Glutamate receptor ionotropic, AMPA 2) (GluA2)	Gria2	0.0710735	-0.103381	0.332388	-0.0382295	0.75492	0.0149336
				Q9Z2W8	GRIA4_MOUSE	Glutamate receptor 4 (GluR-4) (GluR4) (AMPA-selective glutamate receptor 4) (GluR-D) (Glutamate receptor ionotropic, AMPA 4) (GluA4)	Gria4	0.0273007	0.209493	0.203603	-0.0895965	0.173232	-0.17236
				Q8VD04	GRAP1_MOUSE	GRIP1-associated protein 1 (GRASP-1) (HCMV-interacting protein) [Cleaved into: GRASP-1 C-terminal chain (30kDa C-terminus form)]	Gripap1	0.201473	-0.0510271	0.77105	0.00914812	0.387575	0.0334196
				P97772	GRM1_MOUSE	Metabotropic glutamate receptor 1 (mGluR1)	Grm1	0.174249	0.100504	0.960893	-0.0118558	0.763277	0.0544643
+			MC_FC	Q14BI2	GRM2_MOUSE	Metabotropic glutamate receptor 2 (mGluR2)	Grm2	0.00786765	-0.351847	0.638071	0.0508714	0.0923297	0.21493
				Q9QYS2	GRM3_MOUSE	Metabotropic glutamate receptor 3 (mGluR3)	Grm3	0.0532215	-0.168913	0.980607	-0.00362587	0.175689	0.172
+			MC_FC	Q3UVX5	GRM5_MOUSE	Metabotropic glutamate receptor 5 (mGluR5)	Grm5	0.0189799	-0.390241	0.993988	-0.00361133	0.521406	0.143221
				Q68ED2	GRM7_MOUSE	Metabotropic glutamate receptor 7 (mGluR7)	Grm7	0.0765251	-0.125198	0.0569366	0.241448	0.0439568	0.161633
				P28798	GRN_MOUSE	Progranulin (PGRN) (Acrogranin) (Epithelin/granulin precursor) (Glycoprotein of 88 Kda) (GP88) (Glycoprotein 88) (PC cell-derived growth factor) (PCDGF) (Proepithelin) (PEPI) [Cleaved into: Paragranulin; Granulin-1; Granulin-2; Granulin-3; Granulin-4; Granulin-5; Granulin-6; Granulin-7]	Grn	0.888131	0.00413585	0.520538	0.0312059	0.0940931	-0.129553
				Q99LP6	GRPE1_MOUSE	GrpE protein homolog 1, mitochondrial (Mt-GrpE#1)	Grpel1	0.893807	0.00394011	0.0792558	-0.0857401	0.363863	-0.0477769
				Q2NL51	GSK3A_MOUSE	Glycogen synthase kinase-3 alpha (GSK-3 alpha) (EC 2.7.11.26) (Serine/threonine-protein kinase GSK3A) (EC 2.7.11.1)	Gsk3a	0.649315	-0.0158665	0.824681	0.0142303	0.604971	-0.051024
				Q9WV60	GSK3B_MOUSE	Glycogen synthase kinase-3 beta (GSK-3 beta) (EC 2.7.11.26) (Serine/threonine-protein kinase GSK3B) (EC 2.7.11.1)	Gsk3b	0.289434	-0.0341873	0.114335	0.0505152	0.816268	-0.00530052
				Q8R050	ERF3A_MOUSE	Eukaryotic peptide chain release factor GTP-binding subunit ERF3A (Eukaryotic peptide chain release factor subunit 3a) (eRF3a) (G1 to S phase transition protein 1 homolog)	Gspt1	0.774542	0.00873709	0.767718	-0.0195713	0.0887001	-0.103248
				Q149F3	ERF3B_MOUSE	Eukaryotic peptide chain release factor GTP-binding subunit ERF3B (Eukaryotic peptide chain release factor subunit 3b) (eRF3b) (G1 to S phase transition protein 2 homolog)	Gspt2	0.0637919	-0.201552	0.805517	0.0678287	0.314469	0.167569
				P47791	GSHR_MOUSE	Glutathione reductase, mitochondrial (GR) (GRase) (EC 1.8.1.7)	Gsr	0.0792616	0.0940299	0.480527	0.0222251	0.264228	0.0542457
				P51855	GSHB_MOUSE	Glutathione synthetase (GSH synthetase) (GSH-S) (EC 6.3.2.3) (Glutathione synthase)	Gss	0.0165903	0.196663	0.125579	-0.0895863	0.0116076	-0.101213
				P24472	GSTA4_MOUSE	Glutathione S-transferase A4 (EC 2.5.1.18) (GST A4-4) (GSTA4-4) (GST class-alpha member 4) (Glutathione S-transferase 5.7) (GST 5.7)	Gsta4	0.0921062	0.0785227	0.186379	-0.0397649	0.00102456	-0.104281
				Q9DCM2	GSTK1_MOUSE	Glutathione S-transferase kappa 1 (EC 2.5.1.18) (GST 13-13) (GST class-kappa) (GSTK1-1) (mGSTK1) (Glutathione S-transferase subunit 13)	Gstk1	0.096443	0.105492	0.325228	0.0921926	0.698365	-0.0272474
				P10649	GSTM1_MOUSE	Glutathione S-transferase Mu 1 (EC 2.5.1.18) (GST 1-1) (GST class-mu 1) (Glutathione S-transferase GT8.7) (pmGT10)	Gstm1	0.0344757	-0.132095	0.680368	-0.0213561	0.0012181	0.067533
				P48774	GSTM5_MOUSE	Glutathione S-transferase Mu 5 (EC 2.5.1.18) (Fibrous sheath component 2) (Fsc2) (GST class-mu 5)	Gstm5	0.0831804	0.0843334	0.00160193	-0.0952992	0.000761793	-0.123674
+			MC_FC	Q80W21	GSTM7_MOUSE	Glutathione S-transferase Mu 7 (EC 2.5.1.18) (GST class-mu 7) (GSTM-7)	Gstm7	0.00801498	0.282809	0.0523459	-0.105157	0.000770376	-0.199018
				O09131	GSTO1_MOUSE	Glutathione S-transferase omega-1 (GSTO-1) (EC 2.5.1.18) (Glutathione S-transferase omega 1-1) (GSTO 1-1) (Glutathione-dependent dehydroascorbate reductase) (EC 1.8.5.1) (Monomethylarsonic acid reductase) (MMA(V) reductase) (EC 1.20.4.2) (S-(Phenacyl)glutathione reductase) (SPG-R) (p28)	Gsto1	0.13153	-0.0750501	0.187366	0.0462174	0.317953	-0.0397654
				P19157	GSTP1_MOUSE	Glutathione S-transferase P 1 (Gst P1) (EC 2.5.1.18) (GST YF-YF) (GST class-pi) (GST-piB) (Preadipocyte growth factor)	Gstp1	0.415443	0.0263681	0.107309	0.0371656	0.436496	-0.025095
				Q64471	GSTT1_MOUSE	Glutathione S-transferase theta-1 (EC 2.5.1.18) (GST class-theta-1)	Gstt1	0.0768311	-0.107949	0.905528	0.00724697	0.436496	-0.0577099
				Q9WVL0	MAAI_MOUSE	Maleylacetoacetate isomerase (MAAI) (EC 5.2.1.2) (GSTZ1-1) (Glutathione S-transferase zeta 1) (EC 2.5.1.18)	Gstz1	0.218418	-0.0477061	0.0312201	-0.0610254	0.247069	-0.055361
				Q9ESZ8	GTF2I_MOUSE	General transcription factor II-I (GTFII-I) (TFII-I) (Bruton tyrosine kinase-associated protein 135) (BAP-135) (BTK-associated protein 135)	Gtf2i	0.446744	-0.028604	0.150033	-0.0606725	0.676288	-0.0308566
				O08582	GTPB1_MOUSE	GTP-binding protein 1 (G-protein 1) (GP-1) (GP1)	Gtpbp1	0.104186	0.165595	0.741188	0.130865	0.036479	0.260345
				O54865	GCYB1_MOUSE	Guanylate cyclase soluble subunit beta-1 (GCS-beta-1) (EC 4.6.1.2) (Guanylate cyclase soluble subunit beta-3) (GCS-beta-3) (Soluble guanylate cyclase small subunit)	Gucy1b3	0.107323	-0.0754113	0.0556552	-0.0694292	0.265324	0.0344076
				Q64520	KGUA_MOUSE	Guanylate kinase (EC 2.7.4.8) (GMP kinase) (Guanylate kinase 1)	Guk1	0.0182102	0.174697	0.203434	0.0560784	0.0162447	-0.167814
+			MC_FC	Q9R062	GLYG_MOUSE	Glycogenin-1 (GN-1) (GN1) (EC 2.4.1.186)	Gyg1	0.00983051	0.238878	0.0236777	-0.102776	0.107735	-0.139343
				Q9Z1E4	GYS1_MOUSE	Glycogen [starch] synthase, muscle (EC 2.4.1.11)	Gys1	0.95143	0.00177789	0.101323	-0.153891	0.162683	-0.151567
+	+		MC_FC;FN_FC	P10922	H10_MOUSE	Histone H1.0 (Histone H1') (Histone H1(0)) (MyD196) [Cleaved into: Histone H1.0, N-terminally processed]	H1f0	0	1.49973	7.0356e-07	1.57976	0.00167548	0.300571
				Q3THW5	H2AV_MOUSE	Histone H2A.V (H2A.F/Z) (H2A.Z variant histone 2)	H2afv	0.169538	0.0628915	0.622554	0.0169873	0.515003	0.0418715
				P27661	H2AX_MOUSE	Histone H2AX (H2a/x) (Histone H2A.X)	H2afx	0.031137	-0.140268	0.00468622	-0.084743	0.729817	0.0156293
	+		FN_FC	Q9QZQ8	H2AY_MOUSE	Core histone macro-H2A.1 (Histone macroH2A1) (mH2A1) (H2A.y) (H2A/y)	H2afy	0.505221	0.0257099	0.000509458	0.489914	0.00227181	0.330684
	+		FN_FC	Q8CCK0	H2AW_MOUSE	Core histone macro-H2A.2 (Histone macroH2A2) (mH2A2)	H2afy2	0.0823289	0.189081	0.013699	0.730232	0.00418256	0.473944
				P84244	H33_MOUSE	Histone H3.3	H3f3a	0.673956	0.0126967	0.0249362	0.142126	0.00164551	0.195418
				Q9JKS5	HABP4_MOUSE	Intracellular hyaluronan-binding protein 4 (IHABP-4) (IHABP4) (Hyaluronic acid-binding protein 4)	Habp4	0.0830183	0.111879	0.318247	-0.0866337	0.207403	-0.0772305
				Q8K2C9	HACD3_MOUSE	Very-long-chain (3R)-3-hydroxyacyl-CoA dehydratase 3 (EC 4.2.1.134) (3-hydroxyacyl-CoA dehydratase 3) (HACD3) (Butyrate-induced protein 1) (B-ind1) (Protein-tyrosine phosphatase-like A domain-containing protein 1)	Hacd3	0.0364085	-0.137973	0.700195	-0.0149305	0.585712	-0.0244253
				Q61425	HCDH_MOUSE	Hydroxyacyl-coenzyme A dehydrogenase, mitochondrial (HCDH) (EC 1.1.1.35) (Medium and short-chain L-3-hydroxyacyl-coenzyme A dehydrogenase) (Short-chain 3-hydroxyacyl-CoA dehydrogenase)	Hadh	0.0873888	0.0834694	0.0357647	-0.06041	0.376312	-0.0180612
+			MC_FC	Q8BMS1	ECHA_MOUSE	Trifunctional enzyme subunit alpha, mitochondrial (Monolysocardiolipin acyltransferase) (EC 2.3.1.-) (TP-alpha) [Includes: Long-chain enoyl-CoA hydratase (EC 4.2.1.17); Long chain 3-hydroxyacyl-CoA dehydrogenase (EC 1.1.1.211)]	Hadha	0.00822047	0.235332	0.000205108	-0.0971274	0.00292179	-0.138184
+			MC_FC	Q99JY0	ECHB_MOUSE	Trifunctional enzyme subunit beta, mitochondrial (TP-beta) [Includes: 3-ketoacyl-CoA thiolase (EC 2.3.1.155) (EC 2.3.1.16) (Acetyl-CoA acyltransferase) (Beta-ketothiolase)]	Hadhb	0.00862162	0.242045	0.0223299	-0.0725503	0.00104576	-0.149963
				Q99KB8	GLO2_MOUSE	Hydroxyacylglutathione hydrolase, mitochondrial (EC 3.1.2.6) (Glyoxalase II) (Glx II)	Hagh	0.85428	0.00468588	0.0728052	-0.0364056	0.46303	0.0171418
+			MC_FC	O35668	HAP1_MOUSE	Huntingtin-associated protein 1 (HAP-1)	Hap1	0.00164706	-0.608123	0.0020951	0.176837	0.00483539	0.208381
+	+		MC_FC;FN_FC	Q9QUP5	HPLN1_MOUSE	Hyaluronan and proteoglycan link protein 1 (Cartilage-linking protein 1) (Cartilage-link protein) (Proteoglycan link protein)	Hapln1	0.00193103	0.47337	7.48386e-06	-0.509478	0.00112028	-0.264924
+			MC_FC	Q9ESM3	HPLN2_MOUSE	Hyaluronan and proteoglycan link protein 2 (Brain link protein 1)	Hapln2	0.00588372	0.301658	0.00318883	-0.122452	0.0107848	-0.160597
+	+		MC_FC;FN_FC	Q80WM4	HPLN4_MOUSE	Hyaluronan and proteoglycan link protein 4 (Brain link protein 2)	Hapln4	0.00332203	0.434306	0.00343592	-0.506905	0.000730716	-0.360617
				Q61035	HARS1_MOUSE	Histidine--tRNA ligase, cytoplasmic (EC 6.1.1.21) (Histidyl-tRNA synthetase) (HisRS)	Hars	0.852278	0.00564718	0.15449	-0.0660324	0.0634626	-0.0983629
				O35387	HAX1_MOUSE	HCLS1-associated protein X-1 (HS1-associating protein X-1) (HAX-1) (HS1-binding protein 1) (HSP1BP-1)	Hax1	0.250848	-0.067991	0.350109	-0.179062	0.54698	-0.0690739
	+		FN_FC	P01942	HBA_MOUSE	Hemoglobin subunit alpha (Alpha-globin) (Hemoglobin alpha chain)	Hba	0.00939818	-0.210754	1.78737e-06	-0.520013	3.24578e-05	-0.416021
	+		FN_FC	P02088	HBB1_MOUSE	Hemoglobin subunit beta-1 (Beta-1-globin) (Hemoglobin beta-1 chain) (Hemoglobin beta-major chain)	Hbb-b1	0.0156371	-0.175894	2.68848e-05	-0.420125	9.94664e-06	-0.307034
				Q69ZS7	HBS1L_MOUSE	HBS1-like protein	Hbs1l	0.624938	0.0292559	0.571993	-0.128656	0.994932	-0.00192976
				P53702	CCHL_MOUSE	Cytochrome c-type heme lyase (CCHL) (EC 4.4.1.17) (Holocytochrome c-type synthase)	Hccs	0.0596278	0.139181	0.781631	-0.0206928	0.114989	-0.130301
				Q61191	HCFC1_MOUSE	Host cell factor 1 (HCF) (HCF-1) (C1 factor) [Cleaved into: HCF N-terminal chain 1; HCF N-terminal chain 2; HCF N-terminal chain 3; HCF N-terminal chain 4; HCF N-terminal chain 5; HCF N-terminal chain 6; HCF C-terminal chain 1; HCF C-terminal chain 2; HCF C-terminal chain 3; HCF C-terminal chain 4; HCF C-terminal chain 5; HCF C-terminal chain 6]	Hcfc1	0.415077	-0.0285387	0.184602	0.0653481	0.243211	0.066457
				O88704	HCN1_MOUSE	Potassium/sodium hyperpolarization-activated cyclic nucleotide-gated channel 1 (Brain cyclic nucleotide-gated channel 1) (BCNG-1) (Hyperpolarization-activated cation channel 2) (HAC-2)	Hcn1	0.612953	-0.0191746	0.0237855	-0.203764	0.111974	0.0874867
+			MC_FC	O88703	HCN2_MOUSE	Potassium/sodium hyperpolarization-activated cyclic nucleotide-gated channel 2 (Brain cyclic nucleotide-gated channel 2) (BCNG-2) (Hyperpolarization-activated cation channel 1) (HAC-1)	Hcn2	0.00316981	0.385777	0.000404546	-0.307185	0.000116178	-0.278097
				Q91WA3	HDA11_MOUSE	Histone deacetylase 11 (HD11) (EC 3.5.1.98)	Hdac11	0.96844	-0.00173807	0.774116	-0.0491667	0.752032	-0.0436366
				P51859	HDGF_MOUSE	Hepatoma-derived growth factor (HDGF)	Hdgf	0.118633	-0.0731554	0.980555	-0.00117254	0.0723847	0.061523
+			MC_FC	Q9JMG7	HDGR3_MOUSE	Hepatoma-derived growth factor-related protein 3 (HRP-3)	Hdgfrp3	0.00335043	-0.371333	0.997192	-0.00026989	0.0150971	0.1092
				Q3UGR5	HDHD2_MOUSE	Haloacid dehalogenase-like hydrolase domain-containing protein 2	Hdhd2	0.0941071	0.0900271	0.0897803	-0.105341	0.151614	-0.0684559
				Q8VDJ3	VIGLN_MOUSE	Vigilin (High density lipoprotein-binding protein) (HDL-binding protein)	Hdlbp	0.0376261	0.142629	0.177501	-0.0764337	0.193702	-0.100657
				Q8C547	HTR5B_MOUSE	HEAT repeat-containing protein 5B	Heatr5b	0.752174	0.0279799	0.416365	0.316879	0.459184	0.256098
				Q9R257	HEBP1_MOUSE	Heme-binding protein 1 (p22HBP)	Hebp1	0.122414	-0.0860565	0.310447	0.0777757	0.0884959	0.122766
				Q69ZR2	HECD1_MOUSE	E3 ubiquitin-protein ligase HECTD1 (EC 2.3.2.26) (HECT domain-containing protein 1) (HECT-type E3 ubiquitin transferase HECTD1) (Protein open mind)	Hectd1	0.105727	0.0948131	0.211104	0.0892258	0.157439	-0.101694
				Q3U487	HECD3_MOUSE	E3 ubiquitin-protein ligase HECTD3 (EC 2.3.2.26) (HECT domain-containing protein 3) (HECT-type E3 ubiquitin transferase HECTD3)	Hectd3	0.201185	-0.0889821	0.746343	0.0570993	0.670218	0.0709922
				Q640R3	HECAM_MOUSE	Hepatocyte cell adhesion molecule (Protein hepaCAM)	Hepacam	0.0104552	0.193195	0.106665	-0.061151	0.353658	-0.0153418
				Q9Z0Z4	HEPH_MOUSE	Hephaestin (EC 1.-.-.-)	Heph	0.498751	0.0279865	0.313376	-0.104204	0.247482	-0.0651121
				P20060	HEXB_MOUSE	Beta-hexosaminidase subunit beta (EC 3.2.1.52) (Beta-N-acetylhexosaminidase subunit beta) (Hexosaminidase subunit B) (N-acetyl-beta-glucosaminidase subunit beta)	Hexb	0.141494	0.0735004	0.412758	-0.0492206	0.300231	-0.0479248
				Q99LI8	HGS_MOUSE	Hepatocyte growth factor-regulated tyrosine kinase substrate	Hgs	0.916527	0.00359726	0.805517	-0.0254683	0.48894	0.0369632
				Q99L13	3HIDH_MOUSE	3-hydroxyisobutyrate dehydrogenase, mitochondrial (HIBADH) (EC 1.1.1.31)	Hibadh	0.0535709	0.133277	0.710151	-0.0242331	0.459539	-0.0441685
				Q8QZS1	HIBCH_MOUSE	3-hydroxyisobutyryl-CoA hydrolase, mitochondrial (EC 3.1.2.4) (3-hydroxyisobutyryl-coenzyme A hydrolase) (HIB-CoA hydrolase) (HIBYL-CoA-H)	Hibch	0.405013	0.028759	0.423924	-0.0203609	0.641624	-0.0223746
				P70349	HINT1_MOUSE	Histidine triad nucleotide-binding protein 1 (EC 3.-.-.-) (Adenosine 5'-monophosphoramidase) (Protein kinase C inhibitor 1) (Protein kinase C-interacting protein 1) (PKCI-1)	Hint1	0.687462	-0.0115867	0.126389	-0.0334477	0.47106	0.0315962
				Q9D0S9	HINT2_MOUSE	Histidine triad nucleotide-binding protein 2, mitochondrial (HINT-2) (EC 3.-.-.-) (HINT-3)	Hint2	0.297429	-0.0412974	0.401081	-0.0371957	0.806968	0.00903773
				Q9CPS6	HINT3_MOUSE	Histidine triad nucleotide-binding protein 3 (HINT-3) (EC 3.-.-.-) (HINT-4)	Hint3	0.0610197	0.138874	0.597499	0.0358455	0.746072	-0.0335767
				Q8VD75	HIP1_MOUSE	Huntingtin-interacting protein 1 (HIP-1) (Huntingtin-interacting protein I) (HIP-I)	Hip1	0.0761176	0.117123	0.153135	-0.124104	0.428638	-0.110967
				Q9JKY5	HIP1R_MOUSE	Huntingtin-interacting protein 1-related protein (HIP1-related protein)	Hip1r	0.852923	-0.00610566	0.434967	-0.043833	0.4871	-0.0442259
+	+		MC_FC;FN_FC	P43276	H15_MOUSE	Histone H1.5 (H1 VAR.5) (H1b)	Hist1h1b	0	1.39422	9.17143e-06	1.65167	0.00181425	0.429267
+	+		MC_FC;FN_FC	P43277	H13_MOUSE	Histone H1.3 (H1 VAR.4) (H1d)	Hist1h1d	0	1.03462	1.78737e-06	1.36411	0.000538375	0.409021
+	+		MC_FC;FN_FC	P43274	H14_MOUSE	Histone H1.4 (H1 VAR.2) (H1e)	Hist1h1e	0	0.777058	9.7923e-06	1.04718	0.00900312	0.29463
				Q8CGP2	H2B1P_MOUSE	Histone H2B type 1-P	Hist1h2bp	0.306612	0.036705	0.000105449	0.23919	0.000246687	0.297126
				P62806	H4_MOUSE	Histone H4	Hist1h4a	0.0156869	0.175413	8.87964e-05	0.279263	0.00160707	0.126445
				Q9D2U9	H2B3A_MOUSE	Histone H2B type 3-A	Hist3h2ba	0.907591	0.00384402	0.0125939	0.182009	0.0019622	0.306264
				P17710	HXK1_MOUSE	Hexokinase-1 (EC 2.7.1.1) (Hexokinase type I) (HK I) (Hexokinase, tumor isozyme)	Hk1	0.0139742	-0.170086	0.977138	-0.000652313	0.00102922	0.0837841
				P17095	HMGA1_MOUSE	High mobility group protein HMG-I/HMG-Y (HMG-I(Y)) (High mobility group AT-hook protein 1) (High mobility group protein A1)	Hmga1	0.141065	-0.0842116	0.00928312	0.215986	0.0639538	0.146992
				P63158	HMGB1_MOUSE	High mobility group protein B1 (High mobility group protein 1) (HMG-1)	Hmgb1	0.136068	-0.0672014	0.782624	0.00897384	0.367615	0.0343339
				O54879	HMGB3_MOUSE	High mobility group protein B3 (High mobility group protein 2a) (HMG-2a) (High mobility group protein 4) (HMG-4)	Hmgb3	0.084784	0.10461	0.823456	0.0267212	0.698101	0.0268254
				P38060	HMGCL_MOUSE	Hydroxymethylglutaryl-CoA lyase, mitochondrial (HL) (HMG-CoA lyase) (EC 4.1.3.4) (3-hydroxy-3-methylglutarate-CoA lyase)	Hmgcl	0.221867	-0.0627756	0.494408	-0.0495355	0.332061	0.0580299
				Q8JZK9	HMCS1_MOUSE	Hydroxymethylglutaryl-CoA synthase, cytoplasmic (HMG-CoA synthase) (EC 2.3.3.10) (3-hydroxy-3-methylglutaryl coenzyme A synthase)	Hmgcs1	0.108007	0.0756061	0.328805	0.0358689	0.0119775	-0.0853224
				Q9DCB1	HMGN3_MOUSE	High mobility group nucleosome-binding domain-containing protein 3	Hmgn3	0.384445	0.0443101	0.0642172	0.250709	0.914126	0.0141256
				O70252	HMOX2_MOUSE	Heme oxygenase 2 (HO-2) (EC 1.14.14.18)	Hmox2	0.0554383	0.123413	0.965505	0.00316763	0.0681938	-0.0954869
				P97825	JUPI1_MOUSE	Jupiter microtubule associated homolog 1 (Hematological and neurological expressed 1 protein) [Cleaved into: Jupiter microtubule associated homolog 1, N-terminally processed]	Hn1	0.384136	-0.0458026	0.478516	0.108792	0.605939	-0.038763
+			MC_FC	Q6PGH2	JUPI2_MOUSE	Jupiter microtubule associated homolog 2 (Hematological and neurological expressed 1-like protein) (HN1-like protein)	Hn1l	0.0108889	0.253513	0.0857614	0.15174	0.0182425	-0.187319
				Q91VF2	HNMT_MOUSE	Histamine N-methyltransferase (HMT) (EC 2.1.1.8)	Hnmt	0.0716415	-0.08617	0.000455874	0.114518	0.0212479	0.0852625
				Q9CX86	ROA0_MOUSE	Heterogeneous nuclear ribonucleoprotein A0 (hnRNP A0)	Hnrnpa0	0.105794	-0.089124	0.929483	0.00630856	0.746072	0.0182681
				P49312	ROA1_MOUSE	Heterogeneous nuclear ribonucleoprotein A1 (hnRNP A1) (HDP-1) (Helix-destabilizing protein) (Single-strand-binding protein) (Topoisomerase-inhibitor suppressed) (hnRNP core protein A1) [Cleaved into: Heterogeneous nuclear ribonucleoprotein A1, N-terminally processed]	Hnrnpa1	0.0660743	-0.0996656	0.328102	0.0278735	0.366966	-0.0242844
				O88569	ROA2_MOUSE	Heterogeneous nuclear ribonucleoproteins A2/B1 (hnRNP A2/B1)	Hnrnpa2b1	0.0463409	-0.11668	0.483717	0.0194464	0.1171	0.044353
				Q8BG05	ROA3_MOUSE	Heterogeneous nuclear ribonucleoprotein A3 (hnRNP A3)	Hnrnpa3	0.15413	-0.070684	0.501049	-0.0232935	0.905729	0.00995255
				Q99020	ROAA_MOUSE	Heterogeneous nuclear ribonucleoprotein A/B (hnRNP A/B) (CArG-binding factor-A) (CBF-A)	Hnrnpab	0.0619745	-0.121171	0.73608	-0.0211411	0.26691	0.0624499
				Q9Z204	HNRPC_MOUSE	Heterogeneous nuclear ribonucleoproteins C1/C2 (hnRNP C1/C2)	Hnrnpc	0.100054	-0.0811338	0.64287	-0.0160787	0.4272	0.02437
				Q60668	HNRPD_MOUSE	Heterogeneous nuclear ribonucleoprotein D0 (hnRNP D0) (AU-rich element RNA-binding protein 1)	Hnrnpd	0.0482552	-0.119313	0.605927	0.0195198	0.273532	0.0300131
				Q9Z130	HNRDL_MOUSE	Heterogeneous nuclear ribonucleoprotein D-like (hnRNP D-like) (hnRNP DL) (JKT41-binding protein)	Hnrnpdl	0.607078	0.0157392	0.41322	0.0241232	0.345887	-0.0471518
				Q9Z2X1	HNRPF_MOUSE	Heterogeneous nuclear ribonucleoprotein F (hnRNP F) [Cleaved into: Heterogeneous nuclear ribonucleoprotein F, N-terminally processed]	Hnrnpf	0.44025	-0.0300643	0.53497	-0.0577195	0.222776	-0.0748348
				O35737	HNRH1_MOUSE	Heterogeneous nuclear ribonucleoprotein H (hnRNP H) [Cleaved into: Heterogeneous nuclear ribonucleoprotein H, N-terminally processed]	Hnrnph1	0.0302427	-0.135127	0.509571	0.0129161	0.0066738	0.105058
				P70333	HNRH2_MOUSE	Heterogeneous nuclear ribonucleoprotein H2 (hnRNP H2) (Heterogeneous nuclear ribonucleoprotein H') (hnRNP H') [Cleaved into: Heterogeneous nuclear ribonucleoprotein H2, N-terminally processed]	Hnrnph2	0.170883	-0.0704119	0.494408	0.0620093	0.629277	0.0390785
				P61979	HNRPK_MOUSE	Heterogeneous nuclear ribonucleoprotein K (hnRNP K)	Hnrnpk	0.0506198	-0.114758	0.693765	-0.0150938	0.065111	0.0496325
				Q8R081	HNRPL_MOUSE	Heterogeneous nuclear ribonucleoprotein L (hnRNP L)	Hnrnpl	0.0361979	-0.130426	0.934834	-0.00260401	0.00290949	0.0966964
				Q921F4	HNRLL_MOUSE	Heterogeneous nuclear ribonucleoprotein L-like	Hnrnpll	0.0220439	-0.18289	0.130664	-0.0412576	0.0303734	0.138161
				Q9D0E1	HNRPM_MOUSE	Heterogeneous nuclear ribonucleoprotein M (hnRNP M)	Hnrnpm	0.0435352	-0.12942	0.472404	0.0306592	0.468298	0.0293016
				Q8VEK3	HNRPU_MOUSE	Heterogeneous nuclear ribonucleoprotein U (hnRNP U) (Scaffold-attachment factor A) (SAF-A)	Hnrnpu	0.0821314	-0.0952096	0.812406	0.00966644	0.154927	0.0628476
				Q00PI9	HNRL2_MOUSE	Heterogeneous nuclear ribonucleoprotein U-like protein 2 (MLF1-associated nuclear protein)	Hnrnpul2	0.139844	-0.0667782	0.638941	-0.014534	0.219827	0.0388699
				Q9Z2Y3	HOME1_MOUSE	Homer protein homolog 1 (Homer-1) (VASP/Ena-related gene up-regulated during seizure and LTP 1) (Vesl-1)	Homer1	0.110047	-0.0902002	0.908026	-0.0120397	0.0391301	0.12349
				Q8BUK6	HOOK3_MOUSE	Protein Hook homolog 3 (mHK3)	Hook3	0.508869	-0.0212567	0.677396	0.0183747	0.683585	-0.0262232
+	+		MC_FC;FN_FC	Q3TEA8	HP1B3_MOUSE	Heterochromatin protein 1-binding protein 3	Hp1bp3	0	1.29187	0.000105449	1.59847	0.000787941	0.507538
+			MC_FC	P84075	HPCA_MOUSE	Neuron-specific calcium-binding protein hippocalcin	Hpca	0.00827586	-0.264668	0.00690722	0.163728	4.8681e-05	0.326855
+			MC_FC	P62748	HPCL1_MOUSE	Hippocalcin-like protein 1 (Neural visinin-like protein 3) (NVL-3) (NVP-3) (Visinin-like protein 3) (VILIP-3)	Hpcal1	0.00341985	-0.357633	0.000426384	0.235444	0.0705848	0.0482705
+			MC_FC	Q8BGZ1	HPCL4_MOUSE	Hippocalcin-like protein 4 (Neural visinin-like protein 2) (NVP-2)	Hpcal4	0.0016	-0.574391	0.000625577	0.32742	0.0012633	0.28325
				P00493	HPRT_MOUSE	Hypoxanthine-guanine phosphoribosyltransferase (HGPRT) (HGPRTase) (EC 2.4.2.8) (HPRT B)	Hprt1	0.0209984	-0.167619	0.0318137	0.0932078	0.42114	0.0383048
	+		FN_FC	Q91X72	HEMO_MOUSE	Hemopexin	Hpx	0.0145537	-0.186198	0.000466109	-0.61935	0.412532	-0.0629675
				Q61411	RASH_MOUSE	GTPase HRas (EC 3.6.5.2) (H-Ras-1) (Transforming protein p21) (c-H-ras) (p21ras) [Cleaved into: GTPase HRas, N-terminally processed]	Hras	0.0773571	-0.0941949	0.115381	0.0480971	0.00887707	1.10605
				P52760	RIDA_MOUSE	2-iminobutanoate/2-iminopropanoate deaminase (EC 3.5.99.10) (Heat-responsive protein 12) (Reactive intermediate imine deaminase A homolog) (Translation inhibitor L-PSP ribonuclease)	Hrsp12	0.02463	0.164844	0.150748	-0.0495563	0.00193276	-0.176155
				Q9CQZ1	HSBP1_MOUSE	Heat shock factor-binding protein 1	Hsbp1	0.0742402	-0.114565	0.223544	0.108456	0.636265	0.0316262
+	+		MC_FC;FN_FC	P50172	DHI1_MOUSE	Corticosteroid 11-beta-dehydrogenase isozyme 1 (EC 1.1.1.146) (11-beta-hydroxysteroid dehydrogenase 1) (11-DH) (11-beta-HSD1) (11beta-HSD1A)	Hsd11b1	0	0.853805	0.00923946	-0.472474	0.000517214	-0.594447
				O08756	HCD2_MOUSE	3-hydroxyacyl-CoA dehydrogenase type-2 (EC 1.1.1.35) (17-beta-estradiol 17-dehydrogenase) (EC 1.1.1.62) (2-methyl-3-hydroxybutyryl-CoA dehydrogenase) (MHBD) (3-alpha-(17-beta)-hydroxysteroid dehydrogenase (NAD(+))) (EC 1.1.1.239) (3-hydroxy-2-methylbutyryl-CoA dehydrogenase) (EC 1.1.1.178) (3-hydroxyacyl-CoA dehydrogenase type II) (3alpha(or 20beta)-hydroxysteroid dehydrogenase) (EC 1.1.1.53) (7-…	Hsd17b10	0.899021	0.00331974	0.119642	-0.0623946	0.44854	-0.0376816
				Q9EQ06	DHB11_MOUSE	Estradiol 17-beta-dehydrogenase 11 (EC 1.1.1.62) (17-beta-hydroxysteroid dehydrogenase 11) (17-beta-HSD 11) (17bHSD11) (17betaHSD11) (17-beta-hydroxysteroid dehydrogenase XI) (17-beta-HSD XI) (17betaHSDXI) (Dehydrogenase/reductase SDR family member 8)	Hsd17b11	0.115196	0.0918143	0.33286	0.0859659	0.63257	-0.0239935
				O70503	DHB12_MOUSE	Very-long-chain 3-oxoacyl-CoA reductase (EC 1.1.1.330) (17-beta-hydroxysteroid dehydrogenase 12) (17-beta-HSD 12) (3-ketoacyl-CoA reductase) (KAR) (Estradiol 17-beta-dehydrogenase 12) (EC 1.1.1.62) (KIK-I)	Hsd17b12	0.0893369	-0.0959904	0.111473	-0.0856161	0.249268	0.0565236
				P51660	DHB4_MOUSE	Peroxisomal multifunctional enzyme type 2 (MFE-2) (17-beta-hydroxysteroid dehydrogenase 4) (17-beta-HSD 4) (D-bifunctional protein) (DBP) (Multifunctional protein 2) (MFP-2) [Cleaved into: (3R)-hydroxyacyl-CoA dehydrogenase (EC 1.1.1.n12); Enoyl-CoA hydratase 2 (EC 4.2.1.107) (EC 4.2.1.119) (3-alpha,7-alpha,12-alpha-trihydroxy-5-beta-cholest-24-enoyl-CoA hydratase)]	Hsd17b4	0.0734063	0.107935	0.0521433	-0.0645509	0.621925	-0.0466559
				P50171	DHB8_MOUSE	Estradiol 17-beta-dehydrogenase 8 (EC 1.1.1.62) (17-beta-hydroxysteroid dehydrogenase 8) (17-beta-HSD 8) (3-ketoacyl-[acyl-carrier-protein] reductase alpha subunit) (KAR alpha subunit) (3-oxoacyl-[acyl-carrier-protein] reductase) (EC 1.1.1.-) (Protein Ke6) (Ke-6) (Testosterone 17-beta-dehydrogenase 8) (EC 1.1.1.239)	Hsd17b8	0.198316	-0.0528307	0.616604	-0.0238991	0.343392	-0.0440865
				Q8BTX9	HSDL1_MOUSE	Inactive hydroxysteroid dehydrogenase-like protein 1	Hsdl1	0.0384036	-0.140352	0.0428232	0.107005	0.0643795	0.10091
				Q2TPA8	HSDL2_MOUSE	Hydroxysteroid dehydrogenase-like protein 2 (EC 1.-.-.-)	Hsdl2	0.0178901	0.213154	0.56624	-0.0648854	0.000977644	-0.15893
				P07901	HS90A_MOUSE	Heat shock protein HSP 90-alpha (Heat shock 86 kDa) (HSP 86) (HSP86) (Tumor-specific transplantation 86 kDa antigen) (TSTA)	Hsp90aa1	0.108012	-0.0700679	0.0842258	-0.015286	0.0172553	0.0447402
				P11499	HS90B_MOUSE	Heat shock protein HSP 90-beta (Heat shock 84 kDa) (HSP 84) (HSP84) (Tumor-specific transplantation 84 kDa antigen) (TSTA)	Hsp90ab1	0.0567276	-0.0978909	0.0290835	0.0258822	0.00474528	0.0497017
				P08113	ENPL_MOUSE	Endoplasmin (94 kDa glucose-regulated protein) (GRP-94) (Endoplasmic reticulum resident protein 99) (ERp99) (Heat shock protein 90 kDa beta member 1) (Polymorphic tumor rejection antigen 1) (Tumor rejection antigen gp96)	Hsp90b1	0.0686618	-0.0917559	0.00725407	0.0672765	0.304015	0.0210824
				Q8K0U4	HS12A_MOUSE	Heat shock 70 kDa protein 12A	Hspa12a	0.0362556	0.122083	7.70619e-05	-0.125908	0.0212479	-0.0626092
				Q61696	HS71A_MOUSE	Heat shock 70 kDa protein 1A (Heat shock 70 kDa protein 3) (HSP70.3) (Hsp68)	Hspa1a	0.078372	-0.0887792	0.660866	-0.0189285	0.931796	-0.00384331
				P16627	HS71L_MOUSE	Heat shock 70 kDa protein 1-like (Heat shock 70 kDa protein 1L) (Heat shock 70 kDa-like protein 1) (Spermatid-specific heat shock protein 70)	Hspa1l	0.717042	-0.0148163	0.600613	0.0467212	0.755094	0.0325577
				P17156	HSP72_MOUSE	Heat shock-related 70 kDa protein 2 (Heat shock protein 70.2)	Hspa2	0.0973107	-0.0808311	0.0222726	0.079514	0.0120476	0.134576
				Q61316	HSP74_MOUSE	Heat shock 70 kDa protein 4 (Heat shock 70-related protein APG-2)	Hspa4	0.141199	-0.0574799	0.886223	0.00259161	0.00133922	0.0325961
				P48722	HS74L_MOUSE	Heat shock 70 kDa protein 4L (Heat shock 70-related protein APG-1) (Osmotic stress protein 94)	Hspa4l	0.0362834	0.11861	0.000625577	-0.0861583	0.0274722	-0.0511599
				P20029	BIP_MOUSE	Endoplasmic reticulum chaperone BiP (EC 3.6.4.10) (78 kDa glucose-regulated protein) (GRP-78) (Binding-immunoglobulin protein) (BiP) (Heat shock protein 70 family protein 5) (HSP70 family protein 5) (Heat shock protein family A member 5) (Immunoglobulin heavy chain-binding protein)	Hspa5	0.332117	-0.0331202	0.797365	0.0072937	0.634981	0.0102668
				P63017	HSP7C_MOUSE	Heat shock cognate 71 kDa protein (Heat shock 70 kDa protein 8)	Hspa8	0.569666	0.015348	0.0541625	-0.0354137	0.0385481	-0.0299931
				P38647	GRP75_MOUSE	Stress-70 protein, mitochondrial (75 kDa glucose-regulated protein) (GRP-75) (Heat shock 70 kDa protein 9) (Mortalin) (Peptide-binding protein 74) (PBP74) (p66 MOT)	Hspa9	0.0749605	0.0906019	0.0116754	-0.0788889	0.245709	-0.0254111
				Q99P31	HPBP1_MOUSE	Hsp70-binding protein 1 (HspBP1) (Heat shock protein-binding protein 1) (Hsp70-interacting protein 1)	Hspbp1	0.105493	0.112725	0.921825	0.0152297	0.12886	-0.132453
				P63038	CH60_MOUSE	60 kDa heat shock protein, mitochondrial (EC 5.6.1.7) (60 kDa chaperonin) (Chaperonin 60) (CPN60) (HSP-65) (Heat shock protein 60) (HSP-60) (Hsp60) (Mitochondrial matrix protein P1)	Hspd1	0.83138	-0.00506783	0.000337119	-0.0861506	0.0495145	-0.0266514
				Q64433	CH10_MOUSE	10 kDa heat shock protein, mitochondrial (Hsp10) (10 kDa chaperonin) (Chaperonin 10) (CPN10)	Hspe1	0.416316	0.0243068	0.071384	-0.0234241	0.38916	0.0148702
+			MC_FC	Q05793	PGBM_MOUSE	Basement membrane-specific heparan sulfate proteoglycan core protein (HSPG) [Cleaved into: Endorepellin; LG3 peptide]	Hspg2	0.00601117	0.395468	0.00475571	0.383632	0.00181425	0.209796
				Q61699	HS105_MOUSE	Heat shock protein 105 kDa (42 degrees C-HSP) (Heat shock 110 kDa protein) (Heat shock-related 100 kDa protein E7I) (HSP-E7I)	Hsph1	0.0303053	-0.12701	0.000521267	0.0614581	0.000386296	0.092947
				Q9JIY5	HTRA2_MOUSE	Serine protease HTRA2, mitochondrial (EC 3.4.21.108) (High temperature requirement protein A2) (HtrA2) (Omi stress-regulated endoprotease) (Serine protease 25) (Serine proteinase OMI)	Htra2	0.152362	-0.0871594	0.424731	-0.0930283	0.576809	-0.0315578
				P42859	HD_MOUSE	Huntingtin (Huntington disease protein homolog) (HD protein homolog) [Cleaved into: Huntingtin, myristoylated N-terminal fragment]	Htt	0.0487294	-0.129461	0.826108	-0.0150614	0.925595	0.0058682
				Q7TMY8	HUWE1_MOUSE	E3 ubiquitin-protein ligase HUWE1 (EC 2.3.2.26) (E3Histone) (HECT, UBA and WWE domain-containing protein 1) (HECT-type E3 ubiquitin transferase HUWE1) (Upstream regulatory element-binding protein 1) (URE-B1) (URE-binding protein 1)	Huwe1	0.808105	0.00620961	0.0290835	0.0598454	0.795758	0.0110364
				Q9JKR6	HYOU1_MOUSE	Hypoxia up-regulated protein 1 (GRP-170) (140 kDa Ca(2+)-binding protein) (CBP-140)	Hyou1	0.0725298	-0.0964961	0.00496929	0.0793638	0.087542	0.0660882
				Q9CR41	HYPK_MOUSE	Huntingtin-interacting protein K (Huntingtin yeast partner K)	Hypk	0.0261939	-0.236142	0.33286	-0.132715	0.103929	-0.0413911
+			MC_FC	Q8BU30	SYIC_MOUSE	Isoleucine--tRNA ligase, cytoplasmic (EC 6.1.1.5) (Isoleucyl-tRNA synthetase) (IRS) (IleRS)	Iars	0.00778157	0.2449	0.0536835	-0.0816321	0.00394207	-0.150938
				Q8BIJ6	SYIM_MOUSE	Isoleucine--tRNA ligase, mitochondrial (EC 6.1.1.5) (Isoleucyl-tRNA synthetase) (IleRS)	Iars2	0.757528	0.00797319	0.000625577	-0.109845	0.228761	-0.0236497
				Q8CAK1	CAF17_MOUSE	Putative transferase CAF17 homolog, mitochondrial (EC 2.1.-.-) (Iron-sulfur cluster assembly factor homolog)	Iba57	0.26932	0.0676875	0.766777	0.0619273	0.666811	-0.0437016
				P97411	ICA69_MOUSE	Islet cell autoantigen 1 (69 kDa islet cell autoantigen) (ICA69) (Islet cell autoantigen p69) (ICAp69) (p69)	Ica1	0.354697	-0.0395148	0.100853	0.147211	0.175602	0.0913584
				Q8R035	ICT1_MOUSE	Peptidyl-tRNA hydrolase ICT1, mitochondrial (EC 3.1.1.29) (39S ribosomal protein L58, mitochondrial) (MRP-L58) (Immature colon carcinoma transcript 1 protein homolog)	Ict1	0.892992	-0.0038054	0.180256	-0.0964851	0.0590939	-0.141706
+			MC_FC	Q9JHR7	IDE_MOUSE	Insulin-degrading enzyme (EC 3.4.24.56) (Insulin protease) (Insulinase) (Insulysin)	Ide	0.00590728	0.347277	0.0509321	-0.100065	0.000501245	-0.348095
				O88844	IDHC_MOUSE	Isocitrate dehydrogenase [NADP] cytoplasmic (IDH) (EC 1.1.1.42) (Cytosolic NADP-isocitrate dehydrogenase) (IDP) (NADP(+)-specific ICDH) (Oxalosuccinate decarboxylase)	Idh1	0.628849	0.0137224	0.0312201	0.0633316	0.238372	-0.0292592
+			MC_FC	P54071	IDHP_MOUSE	Isocitrate dehydrogenase [NADP], mitochondrial (IDH) (EC 1.1.1.42) (ICD-M) (IDP) (NADP(+)-specific ICDH) (Oxalosuccinate decarboxylase)	Idh2	0.00793388	-0.246718	0.00135941	0.0589328	0.00107517	0.141516
				Q9D6R2	IDH3A_MOUSE	Isocitrate dehydrogenase [NAD] subunit alpha, mitochondrial (EC 1.1.1.41) (Isocitric dehydrogenase subunit alpha) (NAD(+)-specific ICDH subunit alpha)	Idh3a	0.118829	0.0689278	0.000180901	-0.164528	0.28847	-0.0203681
				P70404	IDHG1_MOUSE	Isocitrate dehydrogenase [NAD] subunit gamma 1, mitochondrial (Isocitric dehydrogenase subunit gamma) (NAD(+)-specific ICDH subunit gamma)	Idh3g	0.116643	0.0661879	0.000130158	-0.177005	0.901472	0.0047617
				P58044	IDI1_MOUSE	Isopentenyl-diphosphate Delta-isomerase 1 (EC 5.3.3.2) (Isopentenyl pyrophosphate isomerase 1) (IPP isomerase 1) (IPPI1)	Idi1	0.684503	-0.0138793	0.675578	0.0421228	0.37425	-0.0559506
				Q9DAI2	IFT22_MOUSE	Intraflagellar transport protein 22 homolog (Rab-like protein 5)	Ift22	0.135907	-0.0789757	0.160481	0.0959175	0.243582	0.0712905
				Q8HW98	IGLO5_MOUSE	IgLON family member 5	Iglon5	0.0266382	0.226305	0.83005	-0.0293362	0.0628335	-0.144534
+			MC_FC	Q7TNR6	IGS21_MOUSE	Immunoglobulin superfamily member 21 (IgSF21)	Igsf21	0.00561006	-0.383589	0.904093	-0.00918221	0.083287	0.214794
				Q8R366	IGSF8_MOUSE	Immunoglobulin superfamily member 8 (IgSF8) (CD81 partner 3) (Glu-Trp-Ile EWI motif-containing protein 2) (EWI-2) (Keratinocyte-associated transmembrane protein 4) (KCT-4) (Prostaglandin regulatory-like protein) (PGRL) (CD antigen CD316)	Igsf8	0.0549081	-0.10289	0.122536	0.0548344	0.0358528	0.0764055
				Q7TT37	ELP1_MOUSE	Elongator complex protein 1 (ELP1) (IkappaB kinase complex-associated protein) (IKK complex-associated protein)	Ikbkap	0.0773323	-0.115827	0.0144509	0.113671	0.289628	0.110394
				Q61730	IL1AP_MOUSE	Interleukin-1 receptor accessory protein (IL-1 receptor accessory protein) (IL-1RAcP) (EC 3.2.2.6) (Interleukin-33 receptot beta chain)	Il1rap	0.0828499	0.122223	0.545714	-0.0935581	0.973758	-0.00465083
				Q9CXY6	ILF2_MOUSE	Interleukin enhancer-binding factor 2 (Nuclear factor of activated T-cells 45 kDa)	Ilf2	0.0509006	-0.13304	0.57648	-0.0312788	0.906807	-0.00737786
				Q9Z1X4	ILF3_MOUSE	Interleukin enhancer-binding factor 3	Ilf3	0.0650532	-0.111869	0.971356	0.00190854	0.197559	0.0859151
				O55222	ILK_MOUSE	Integrin-linked protein kinase (EC 2.7.11.1)	Ilk	0.388952	0.0312731	0.996819	0.00054574	0.894372	-0.01284
				Q8CAQ8	MIC60_MOUSE	MICOS complex subunit Mic60 (Mitochondrial inner membrane protein) (Mitofilin)	Immt	0.113333	0.0685072	0.000660232	-0.0874863	0.0125134	-0.0407429
				O55023	IMPA1_MOUSE	Inositol monophosphatase 1 (IMP 1) (IMPase 1) (EC 3.1.3.25) (D-galactose 1-phosphate phosphatase) (EC 3.1.3.94) (Inositol-1(or 4)-monophosphatase 1) (Lithium-sensitive myo-inositol monophosphatase A1)	Impa1	0.050694	0.112571	0.00647108	-0.0675597	0.532078	-0.0231695
				O55091	IMPCT_MOUSE	Protein IMPACT (Imprinted and ancient gene protein)	Impact	0.0137931	-0.19404	0.104617	0.0611835	0.211337	0.0373077
				P24547	IMDH2_MOUSE	Inosine-5'-monophosphate dehydrogenase 2 (IMP dehydrogenase 2) (IMPD 2) (IMPDH 2) (EC 1.1.1.205) (IMPDH-II)	Impdh2	0.201186	-0.0487113	0.0106307	0.0945649	0.848139	0.00417399
+			MC_FC	P46660	AINX_MOUSE	Alpha-internexin (Alpha-Inx) (66 kDa neurofilament protein) (NF-66) (Neurofilament-66)	Ina	0.002	0.442485	1.40047e-06	-0.172015	0.000119061	-0.239397
				Q0GNC1	INF2_MOUSE	Inverted formin-2	Inf2	0.0273953	0.221749	0.100948	0.138499	0.973758	0.00624037
				P49442	INPP_MOUSE	Inositol polyphosphate 1-phosphatase (IPP) (IPPase) (EC 3.1.3.57)	Inpp1	0.0770388	-0.0851116	0.675259	0.0160437	0.0803629	0.0477395
				Q9EPW0	INP4A_MOUSE	Inositol polyphosphate-4-phosphatase type I A (Inositol polyphosphate 4-phosphatase type I) (Inositol polyphosphate 4-phosphatase-1) (4-Ptase-1) (Type I inositol 3,4-bisphosphate 4-phosphatase) (EC 3.1.3.66)	Inpp4a	0.0529234	-0.116542	0.0764548	0.0596032	0.111974	0.0558243
				Q8CDA1	SAC2_MOUSE	Phosphatidylinositide phosphatase SAC2 (EC 3.1.3.25) (Inositol polyphosphate 5-phosphatase F) (Sac domain-containing inositol phosphatase 2) (Sac domain-containing phosphoinositide 4-phosphatase 2) (hSAC2)	Inpp5f	0.246853	0.0609729	0.965532	-0.00641298	0.879479	-0.0288513
+			MC_FC	Q8VI75	IPO4_MOUSE	Importin-4 (Imp4) (Importin-4a) (Imp4a) (Ran-binding protein 4) (RanBP4)	Ipo4	0.0104259	-0.246969	0.54636	-0.0421834	0.231061	0.0566115
				Q8BKC5	IPO5_MOUSE	Importin-5 (Imp5) (Importin subunit beta-3) (Karyopherin beta-3) (Ran-binding protein 5) (RanBP5)	Ipo5	0.161022	-0.059947	0.541857	0.0163174	0.135468	0.0435333
				Q9EPL8	IPO7_MOUSE	Importin-7 (Imp7) (Ran-binding protein 7) (RanBP7)	Ipo7	0.306467	0.0337548	0.153008	0.0261116	0.345887	0.0173211
				Q91YE6	IPO9_MOUSE	Importin-9 (Imp9) (Importin-9a) (Imp9a) (Importin-9b) (Imp9b) (Ran-binding protein 9) (RanBP9)	Ipo9	0.933281	-0.00275326	0.844288	-0.0162995	0.821866	0.0325239
+			MC_FC	Q8BP00	IQCB1_MOUSE	IQ calmodulin-binding motif-containing protein 1	Iqcb1	0.00653659	-0.33844	0.183382	0.0706232	0.030387	0.157048
				Q8R0S2	IQEC1_MOUSE	IQ motif and SEC7 domain-containing protein 1	Iqsec1	0.278188	0.0405326	0.381446	-0.0228505	0.789728	-0.00825644
				Q3TES0	IQEC3_MOUSE	IQ motif and SEC7 domain-containing protein 3	Iqsec3	0.599833	-0.0159419	0.101423	0.0515873	0.991124	-0.000626326
				Q8VIM9	IRGQ_MOUSE	Immunity-related GTPase family Q protein	Irgq	0.120416	0.0750713	0.559212	-0.0341301	0.0086034	-0.100445
				Q9D924	ISCA1_MOUSE	Iron-sulfur cluster assembly 1 homolog, mitochondrial (HESB-like domain-containing protein 2) (Iron-sulfur assembly protein IscA)	Isca1	0.0263862	0.159537	0.116536	-0.118642	0.131111	-0.0771039
				Q9DCB8	ISCA2_MOUSE	Iron-sulfur cluster assembly 2 homolog, mitochondrial (HESB-like domain-containing protein 1)	Isca2	0.0921674	0.0805829	0.0221496	-0.0630724	0.0514857	-0.0419121
				Q9D7P6	ISCU_MOUSE	Iron-sulfur cluster assembly enzyme ISCU, mitochondrial (NifU-like N-terminal domain-containing protein) (NifU-like protein)	Iscu	0.017993	0.16675	0.0371084	-0.0839431	0.028663	-0.163853
				Q91V64	ISOC1_MOUSE	Isochorismatase domain-containing protein 1	Isoc1	0.291397	0.076618	0.331748	0.124252	0.897497	-0.0326865
				P85094	ISC2A_MOUSE	Isochorismatase domain-containing protein 2A	Isoc2a	0.0763877	0.115951	0.00617503	-0.281202	0.0844172	-0.111654
				Q9CX00	IST1_MOUSE	IST1 homolog	Ist1	0.801821	-0.0079515	0.912183	0.0103784	0.847583	0.0174317
				Q9JHU9	INO1_MOUSE	Inositol-3-phosphate synthase 1 (IPS 1) (EC 5.5.1.4) (Myo-inositol 1-phosphate synthase) (MI-1-P synthase) (MIP synthase)	Isyna1	0.0322418	-0.240828	0.971356	0.00719523	0.8064	0.0413971
+			MC_FC	Q8C863	ITCH_MOUSE	E3 ubiquitin-protein ligase Itchy (EC 2.3.2.26) (HECT-type E3 ubiquitin transferase Itchy homolog)	Itch	0.0481426	0.335155	0.599689	0.214484	0.963549	-0.0221863
				P43406	ITAV_MOUSE	Integrin alpha-V (Vitronectin receptor subunit alpha) (CD antigen CD51) [Cleaved into: Integrin alpha-V heavy chain; Integrin alpha-V light chain]	Itgav	0.041085	0.155232	0.98175	-0.00280452	0.827222	0.0175078
				P09055	ITB1_MOUSE	Integrin beta-1 (Fibronectin receptor subunit beta) (VLA-4 subunit beta) (CD antigen CD29)	Itgb1	0.566326	0.0201206	0.612559	0.0325391	0.120865	0.092828
+			MC_FC	Q61704	ITIH3_MOUSE	Inter-alpha-trypsin inhibitor heavy chain H3 (ITI heavy chain H3) (ITI-HC3) (Inter-alpha-inhibitor heavy chain 3)	Itih3	0.00411765	-0.431515	0.0361108	0.181681	0.00276327	0.187057
				O89051	ITM2B_MOUSE	Integral membrane protein 2B (Immature BRI2) (imBRI2) (Protein E25B) (Transmembrane protein BRI) (Bri) [Cleaved into: BRI2, membrane form (Mature BRI2) (mBRI2); BRI2 intracellular domain (BRI2 ICD); BRI2C, soluble form; Bri23 peptide (Bri2-23) (ABri23) (C-terminal peptide) (P23 peptide)]	Itm2b	0.290717	0.0722735	0.793205	0.0589356	0.909791	-0.0159872
+			MC_FC	Q91VK4	ITM2C_MOUSE	Integral membrane protein 2C (Transmembrane protein BRI3) [Cleaved into: CT-BRI3]	Itm2c	0.00581609	-0.324335	0.000880946	0.181626	0.00292179	0.232271
				Q9D892	ITPA_MOUSE	Inosine triphosphate pyrophosphatase (ITPase) (Inosine triphosphatase) (EC 3.6.1.9) (Non-canonical purine NTP pyrophosphatase) (Non-standard purine NTP pyrophosphatase) (Nucleoside-triphosphate diphosphatase) (Nucleoside-triphosphate pyrophosphatase) (NTPase)	Itpa	0.83315	0.00560212	0.0606117	0.0675676	0.030202	0.0514898
				Q9Z0R4	ITSN1_MOUSE	Intersectin-1 (EH and SH3 domains protein 1)	Itsn1	0.108881	-0.0719604	0.946693	0.00267887	0.0634814	0.0557466
				Q9Z0R6	ITSN2_MOUSE	Intersectin-2 (EH domain and SH3 domain regulator of endocytosis 2) (EH and SH3 domains protein 2) (SH3 domain-containing protein 1B)	Itsn2	0.212826	-0.0570877	0.674158	0.0314636	0.371682	0.0430791
				Q9JHI5	IVD_MOUSE	Isovaleryl-CoA dehydrogenase, mitochondrial (IVD) (EC 1.3.8.4) (Butyryl-CoA dehydrogenase) (EC 1.3.8.1)	Ivd	0.47026	0.0222473	0.793205	-0.00739098	0.144228	-0.0465961
+			MC_FC	Q5DTN8	JKIP3_MOUSE	Janus kinase and microtubule-interacting protein 3 (Neuroendocrine long coiled-coil protein 2)	Jakmip3	0.0104121	0.272881	0.130664	-0.221151	0.448933	-0.0642333
				Q9D8B7	JAM3_MOUSE	Junctional adhesion molecule C (JAM-C) (JAM-2) (Junctional adhesion molecule 3) (JAM-3) [Cleaved into: Soluble form of JAM-C (sJAM-C)]	Jam3	0.123165	0.0883467	0.0111803	-0.231287	0.202392	-0.0962293
+			MC_FC	Q9CR30	JOS2_MOUSE	Josephin-2 (EC 3.4.19.12) (Josephin domain-containing protein 2)	Josd2	0.0125662	0.265671	0.278687	-0.241943	0.359873	-0.0796406
				Q02257	PLAK_MOUSE	Junction plakoglobin (Desmoplakin III) (Desmoplakin-3)	Jup	0.0557025	0.133976	0.377028	0.0821245	0.87646	0.0221903
+			MC_FC	Q6P9J5	KANK4_MOUSE	KN motif and ankyrin repeat domain-containing protein 4 (Ankyrin repeat domain-containing protein 38)	Kank4	0.00980282	0.322668	0.487253	-0.0887406	0.389118	-0.137361
				Q99MN1	SYK_MOUSE	Lysine--tRNA ligase (EC 2.7.7.-) (EC 6.1.1.6) (Lysyl-tRNA synthetase) (LysRS)	Kars	0.0278786	0.152533	0.350273	-0.0265341	0.101971	-0.0677447
				Q8K0T4	KATL1_MOUSE	Katanin p60 ATPase-containing subunit A-like 1 (Katanin p60 subunit A-like 1) (EC 5.6.1.1) (p60 katanin-like 1)	Katnal1	0.262774	0.0531924	0.9142	0.0211456	0.430301	-0.0560138
				Q9D3R6	KATL2_MOUSE	Katanin p60 ATPase-containing subunit A-like 2 (Katanin p60 subunit A-like 2) (EC 5.6.1.1) (p60 katanin-like 2)	Katnal2	0.189106	0.0526309	0.150033	0.0460572	0.340206	0.0330949
				Q8BG40	KTNB1_MOUSE	Katanin p80 WD40 repeat-containing subunit B1 (Katanin p80 subunit B1) (p80 katanin)	Katnb1	0.664545	-0.0147529	0.509571	0.0439234	0.285849	0.0558791
				Q69ZS8	KAZRN_MOUSE	Kazrin	Kazn	0.19768	-0.0534713	0.0417965	0.0675793	0.881284	-0.00936103
				Q6ZPU9	KBP_MOUSE	KIF-binding protein (KIF1-binding protein)	Kbp	0.0372014	0.197078	0.274339	0.117281	0.756067	-0.0515134
				Q8BNW9	KBTBB_MOUSE	Kelch repeat and BTB domain-containing protein 11	Kbtbd11	0.0282088	0.166295	0.0432373	-0.100442	0.0271992	-0.155059
				Q80UY2	KCMF1_MOUSE	E3 ubiquitin-protein ligase KCMF1 (EC 2.3.2.27) (Differentially expressed in branching tubulogenesis 91) (Debt-91) (RING-type E3 ubiquitin transferase KCMF1)	Kcmf1	0.168483	-0.197858	0.667503	-0.228372	0.814926	0.120372
+			MC_FC	P16388	KCNA1_MOUSE	Potassium voltage-gated channel subfamily A member 1 (MBK1) (MKI) (Voltage-gated potassium channel subunit Kv1.1)	Kcna1	0.00211321	0.507519	0.000191358	-0.33268	0.0107241	-0.188677
+			MC_FC	P63141	KCNA2_MOUSE	Potassium voltage-gated channel subfamily A member 2 (MK2) (Voltage-gated potassium channel subunit Kv1.2)	Kcna2	0.00838428	0.29751	0.000246198	-0.296577	0.00474528	-0.219917
+			MC_FC	P62482	KCAB2_MOUSE	Voltage-gated potassium channel subunit beta-2 (EC 1.1.1.-) (K(+) channel subunit beta-2) (Kv-beta-2) (Neuroimmune protein F5)	Kcnab2	0.00547239	0.302365	0.000469792	-0.302214	0.00064224	-0.17536
+	+		MC_FC;FN_FC	Q63959	KCNC3_MOUSE	Potassium voltage-gated channel subfamily C member 3 (KSHIIID) (Voltage-gated potassium channel subunit Kv3.3)	Kcnc3	0	0.753957	0.000125384	-0.570566	7.54621e-05	-0.466508
				Q9Z0V1	KCND3_MOUSE	Potassium voltage-gated channel subfamily D member 3 (Voltage-gated potassium channel subunit Kv4.3)	Kcnd3	0.389614	0.0474138	0.506177	0.105805	0.45116	0.0595839
+			MC_FC	Q9JM63	KCJ10_MOUSE	ATP-sensitive inward rectifier potassium channel 10 (Inward rectifier K(+) channel Kir4.1) (Potassium channel, inwardly rectifying subfamily J member 10)	Kcnj10	0.00572455	0.330968	0.732993	0.016835	0.00102461	-0.257133
+			MC_FC	Q08460	KCMA1_MOUSE	Calcium-activated potassium channel subunit alpha-1 (BK channel) (BKCA alpha) (Calcium-activated potassium channel, subfamily M subunit alpha-1) (K(VCA)alpha) (KCa1.1) (Maxi K channel) (MaxiK) (Slo-alpha) (Slo1) (mSlo1) (Slowpoke homolog) (Slo homolog) (mSlo)	Kcnma1	0.00780269	-0.374739	0.000903311	0.187879	0.0312017	0.260546
				Q6WVG3	KCD12_MOUSE	BTB/POZ domain-containing protein KCTD12 (Pfetin) (Predominantly fetal expressed T1 domain)	Kctd12	0.0494454	-0.135817	0.0407385	0.150462	0.420839	-0.0649045
				Q5DTY9	KCD16_MOUSE	BTB/POZ domain-containing protein KCTD16	Kctd16	0.0514513	-0.188912	0.319986	0.166499	0.0121287	0.314611
+			MC_FC	Q50H33	KCTD8_MOUSE	BTB/POZ domain-containing protein KCTD8	Kctd8	0.00124444	-0.591567	0.00422229	0.299488	0.000517214	0.425747
				Q60749	KHDR1_MOUSE	KH domain-containing, RNA-binding, signal transduction-associated protein 1 (GAP-associated tyrosine phosphoprotein p62) (Src-associated in mitosis 68 kDa protein) (Sam68) (p21 Ras GTPase-activating protein-associated p62) (p68)	Khdrbs1	0.288373	-0.0368719	0.0816882	0.0550704	0.0507407	0.0404711
				Q3U0V1	FUBP2_MOUSE	Far upstream element-binding protein 2 (FUSE-binding protein 2) (KH type-splicing regulatory protein) (KSRP)	Khsrp	0.0499331	-0.114707	0.418527	-0.0228338	0.0692094	0.0628486
				Q8R0A7	K0513_MOUSE	Uncharacterized protein KIAA0513	Kiaa0513	0.3069	-0.0361066	0.235671	-0.0252573	0.101708	-0.0633588
				Q3UMB9	WASC4_MOUSE	WASH complex subunit 4 (WASH complex subunit SWIP)	Kiaa1033	0.413202	-0.0314007	0.985434	-0.00236344	0.404727	-0.0700369
				Q80TL4	PHF24_MOUSE	PHD finger protein 24	Kiaa1045	0.07563	-0.0940747	0.138783	0.0522418	0.00139597	0.125798
				Q80TK0	K1107_MOUSE	AP2-interacting clathrin-endocytosis protein (APache)	Kiaa1107	0.0849793	-0.106095	0.377275	0.0473456	0.118505	0.137759
				Q148V7	RELCH_MOUSE	RAB11-binding protein RELCH (LisH domain and HEAT repeat-containing protein KIAA1468) (RAB11-binding protein containing LisH, coiled-coil, and HEAT repeats)	Kiaa1468	0.0778596	-0.109195	0.19785	0.0814779	0.290003	0.0668178
				P33173	KIF1A_MOUSE	Kinesin-like protein KIF1A (Axonal transporter of synaptic vesicles)	Kif1a	0.690302	-0.0112352	0.0100286	0.028842	0.769103	0.0119562
				Q9QXL2	KI21A_MOUSE	Kinesin-like protein KIF21A	Kif21a	0.552293	-0.0208287	0.998064	0.000200272	0.514203	0.00914049
				P28740	KIF2A_MOUSE	Kinesin-like protein KIF2A (Kinesin-2)	Kif2a	0.65729	0.0129104	0.140816	-0.0524254	0.0385481	-0.050221
				P28741	KIF3A_MOUSE	Kinesin-like protein KIF3A (Microtubule plus end-directed kinesin motor 3A)	Kif3a	0.383227	-0.0490799	0.712321	-0.0531337	0.957133	0.00951815
				Q61771	KIF3B_MOUSE	Kinesin-like protein KIF3B (Microtubule plus end-directed kinesin motor 3B) [Cleaved into: Kinesin-like protein KIF3B, N-terminally processed]	Kif3b	0.360916	-0.030478	0.128587	0.0816181	0.148796	0.0837886
				P33175	KIF5A_MOUSE	Kinesin heavy chain isoform 5A (Kinesin heavy chain neuron-specific 1) (Neuronal kinesin heavy chain) (NKHC)	Kif5a	0.019514	0.171956	0.45713	0.0105238	0.0753385	-0.10011
				Q61768	KINH_MOUSE	Kinesin-1 heavy chain (Conventional kinesin heavy chain) (Ubiquitous kinesin heavy chain) (UKHC)	Kif5b	0.262839	0.0429583	0.898345	0.00478888	0.519849	-0.0195441
				P28738	KIF5C_MOUSE	Kinesin heavy chain isoform 5C (Kinesin heavy chain neuron-specific 2)	Kif5c	0.284299	0.040534	0.0360607	0.0557294	0.132787	0.0527287
				O88447	KLC1_MOUSE	Kinesin light chain 1 (KLC 1)	Klc1	0.396197	-0.0257759	0.00212583	0.070415	0.0117714	0.0565467
				O88448	KLC2_MOUSE	Kinesin light chain 2 (KLC 2)	Klc2	0.0445792	0.128288	0.308468	-0.0403447	0.515382	-0.0169315
				Q64329	KLRA3_MOUSE	Killer cell lectin-like receptor 3 (5E6) (Lymphocyte antigen 49c) (Ly-49c) (Nk2.1) (T-cell surface glycoprotein Ly-49C)	Klra3	0.0226891	0.214205	0.965505	0.00614333	0.797431	-0.0146394
				Q60960	IMA5_MOUSE	Importin subunit alpha-5 (Importin alpha-S1) (Karyopherin subunit alpha-1) (Nucleoprotein interactor 1) (NPI-1) (RAG cohort protein 2) (SRP1-beta)	Kpna1	0.563335	-0.0256228	0.920471	-0.0139372	0.674193	0.0606315
				O35344	IMA4_MOUSE	Importin subunit alpha-4 (Importin alpha Q2) (Qip2) (Karyopherin subunit alpha-3)	Kpna3	0.0868314	-0.110506	0.347524	0.0655291	0.996605	0.000441074
				O35343	IMA3_MOUSE	Importin subunit alpha-3 (Importin alpha Q1) (Qip1) (Karyopherin subunit alpha-4)	Kpna4	0.0395867	-0.166671	0.980565	-0.00262141	0.691784	0.0226545
				O35345	IMA7_MOUSE	Importin subunit alpha-7 (Importin alpha-S2) (Karyopherin subunit alpha-6)	Kpna6	0.201283	0.0651424	0.0635155	0.10863	0.664715	-0.0381594
				P70168	IMB1_MOUSE	Importin subunit beta-1 (Karyopherin subunit beta-1) (Nuclear factor p97) (Pore targeting complex 97 kDa subunit) (PTAC97) (SCG)	Kpnb1	0.260639	-0.0404792	0.173675	0.0334463	0.576258	0.0109282
				P32883	RASK_MOUSE	GTPase KRas (EC 3.6.5.2) (K-Ras 2) (Ki-Ras) (c-K-ras) (c-Ki-ras) [Cleaved into: GTPase KRas, N-terminally processed]	Kras	0.237285	-0.049423	0.66218	0.0208242	0.32254	0.0693479
	+		FN_FC	Q3UV17	K22O_MOUSE	Keratin, type II cytoskeletal 2 oral (Keratin-76) (K76) (Type-II keratin Kb9)	Krt76	0.0156056	0.242267	0.00147834	0.522885	0.833416	-0.00920558
				Q61595	KTN1_MOUSE	Kinectin	Ktn1	0.0808991	0.104616	0.594664	-0.0327959	0.132188	-0.0675049
+			MC_FC	P11627	L1CAM_MOUSE	Neural cell adhesion molecule L1 (N-CAM-L1) (NCAM-L1) (CD antigen CD171)	L1cam	0.00666667	-0.308962	0.00727267	0.129552	0.000977644	0.233597
				Q91YP0	L2HDH_MOUSE	L-2-hydroxyglutarate dehydrogenase, mitochondrial (EC 1.1.99.2) (Duranin)	L2hgdh	0.0681912	-0.116499	0.437768	0.0597689	0.0940094	0.116611
+			MC_FC	Q61292	LAMB2_MOUSE	Laminin subunit beta-2 (Laminin-11 subunit beta) (Laminin-14 subunit beta) (Laminin-15 subunit beta) (Laminin-3 subunit beta) (Laminin-4 subunit beta) (Laminin-7 subunit beta) (Laminin-9 subunit beta) (S-laminin subunit beta) (S-LAM beta)	Lamb2	0.0103368	0.362568	0.0344515	0.418728	0.00419952	0.191182
+	+		MC_FC;FN_FC	P02468	LAMC1_MOUSE	Laminin subunit gamma-1 (Laminin B2 chain) (Laminin-1 subunit gamma) (Laminin-10 subunit gamma) (Laminin-11 subunit gamma) (Laminin-2 subunit gamma) (Laminin-3 subunit gamma) (Laminin-4 subunit gamma) (Laminin-6 subunit gamma) (Laminin-7 subunit gamma) (Laminin-8 subunit gamma) (Laminin-9 subunit gamma) (S-laminin subunit gamma) (S-LAM gamma)	Lamc1	0.00569048	0.483803	0.00906092	0.498385	0.177827	0.141602
				P11438	LAMP1_MOUSE	Lysosome-associated membrane glycoprotein 1 (LAMP-1) (Lysosome-associated membrane protein 1) (120 kDa lysosomal membrane glycoprotein) (CD107 antigen-like family member A) (LGP-120) (Lysosomal membrane glycoprotein A) (LGP-A) (P2B) (CD antigen CD107a)	Lamp1	0.104127	0.0796299	0.64241	-0.0180821	0.366949	-0.0200527
+			MC_FC	Q9D387	LAMP5_MOUSE	Lysosome-associated membrane glycoprotein 5 (Brain and dendritic cell-associated LAMP) (Brain-associated LAMP-like protein) (BAD-LAMP) (Lysosome-associated membrane protein 5) (LAMP-5)	Lamp5	0.00937037	0.432959	0.195679	0.271678	0.152813	0.0802064
				Q9JHS3	LTOR2_MOUSE	Ragulator complex protein LAMTOR2 (Endosomal adaptor protein p14) (Late endosomal/lysosomal Mp1-interacting protein) (Late endosomal/lysosomal adaptor and MAPK and MTOR activator 2) (Mitogen-activated protein-binding protein-interacting protein) (Roadblock domain-containing protein 3)	Lamtor2	0.476238	0.024637	0.00915583	0.0840924	0.670218	0.0267489
				O88653	LTOR3_MOUSE	Ragulator complex protein LAMTOR3 (Late endosomal/lysosomal adaptor and MAPK and MTOR activator 3) (MEK-binding partner 1) (Mp1) (Mitogen-activated protein kinase kinase 1-interacting protein 1) (Mitogen-activated protein kinase scaffold protein 1)	Lamtor3	0.109185	-0.0919502	0.627406	0.0417435	0.253049	-0.0846128
				O89112	LANC1_MOUSE	Glutathione S-transferase LANCL1 (EC 2.5.1.18) (40 kDa erythrocyte membrane protein) (p40) (LanC-like protein 1)	Lancl1	0.501432	-0.0240519	0.54338	-0.0312386	0.50309	0.0351746
				Q9JJK2	LANC2_MOUSE	LanC-like protein 2 (Testis-specific adriamycin sensitivity protein)	Lancl2	0.0388412	-0.121166	0.0271938	0.0599895	0.00777843	0.10427
				Q9CPY7	AMPL_MOUSE	Cytosol aminopeptidase (EC 3.4.11.1) (Cysteinylglycine-S-conjugate dipeptidase) (EC 3.4.13.23) (Leucine aminopeptidase 3) (LAP-3) (Leucyl aminopeptidase) (Peptidase S) (Proline aminopeptidase) (EC 3.4.11.5) (Prolyl aminopeptidase)	Lap3	0.00934139	0.215324	0.00245775	-0.108053	0.00205952	-0.0753913
				Q6ZQ58	LARP1_MOUSE	La-related protein 1 (La ribonucleoprotein domain family member 1)	Larp1	0.145866	0.0696976	0.962584	-0.00380325	0.0841624	-0.0654936
				Q8BMJ2	SYLC_MOUSE	Leucine--tRNA ligase, cytoplasmic (EC 6.1.1.4) (Leucyl-tRNA synthetase) (LeuRS)	Lars	0.0225697	0.16403	0.00360553	-0.0919406	0.0634719	-0.101255
				Q8VDC0	SYLM_MOUSE	Probable leucine--tRNA ligase, mitochondrial (EC 6.1.1.4) (Leucyl-tRNA synthetase) (LeuRS)	Lars2	0.611386	0.0188775	0.980555	0.00323582	0.144275	0.0463073
				Q61792	LASP1_MOUSE	LIM and SH3 domain protein 1 (LASP-1) (Metastatic lymph node gene 50 protein) (MLN 50)	Lasp1	0.013645	-0.183714	0.161609	0.0333724	0.617455	0.0157022
				Q9CX60	LBH_MOUSE	Protein LBH (Limb bud and heart-expressed protein)	Lbh	0.534942	-0.0260787	0.976355	-0.00377321	0.923065	-0.0131586
				Q3U9G9	LBR_MOUSE	Delta(14)-sterol reductase LBR (Delta-14-SR) (EC 1.3.1.70) (3-beta-hydroxysterol Delta (14)-reductase) (C-14 sterol reductase) (C14SR) (Integral nuclear envelope inner membrane protein) (Lamin-B receptor) (Sterol C14-reductase)	Lbr	0.0687929	0.136966	0.623539	0.0345654	0.306983	-0.109936
				Q3UN02	LCLT1_MOUSE	Lysocardiolipin acyltransferase 1 (EC 2.3.1.-) (1-acylglycerol-3-phosphate O-acyltransferase 8) (1-AGP acyltransferase 8) (1-AGPAT 8) (EC 2.3.1.51) (Acyl-CoA:lysocardiolipin acyltransferase 1)	Lclat1	0.0476145	-0.169285	0.0334857	0.12489	0.170051	0.161102
+			MC_FC	P06151	LDHA_MOUSE	L-lactate dehydrogenase A chain (LDH-A) (EC 1.1.1.27) (LDH muscle subunit) (LDH-M)	Ldha	0.00550617	-0.312163	0.00104221	0.121736	0.00156105	0.194955
+			MC_FC	P16125	LDHB_MOUSE	L-lactate dehydrogenase B chain (LDH-B) (EC 1.1.1.27) (LDH heart subunit) (LDH-H)	Ldhb	0.0046993	0.29772	0.000302529	-0.0952053	0.0268547	-0.0804129
				Q9Z2I0	LETM1_MOUSE	Mitochondrial proton/calcium exchanger protein (Leucine zipper-EF-hand-containing transmembrane protein 1)	Letm1	0.141498	0.0597429	0.000420294	-0.0782623	0.283899	-0.021801
+			MC_FC	P16045	LEG1_MOUSE	Galectin-1 (Gal-1) (14 kDa lectin) (Beta-galactoside-binding lectin L-14-I) (Galaptin) (Lactose-binding lectin 1) (Lectin galactoside-binding soluble 1) (S-Lac lectin 1)	Lgals1	0	0.727593	0.209122	-0.0429239	6.30573e-05	-0.531463
				Q8VED9	LEGL_MOUSE	Galectin-related protein (Galectin-related protein A) (Lectin galactoside-binding-like protein A)	Lgalsl	0.052155	-0.123036	0.034394	-0.0746794	0.177673	0.063947
				Q9JIA1	LGI1_MOUSE	Leucine-rich glioma-inactivated protein 1	Lgi1	0.0102604	-0.201561	0.691263	0.00917816	0.000508751	0.112046
				Q8K4Z0	LGI2_MOUSE	Leucine-rich repeat LGI family member 2 (Leucine-rich glioma-inactivated protein 2)	Lgi2	0.0103135	0.235881	0.00559747	-0.0998924	0.0226322	-0.150016
+			MC_FC	Q8K406	LGI3_MOUSE	Leucine-rich repeat LGI family member 3 (Leubrin) (Leucine-rich glioma-inactivated protein 3)	Lgi3	0.00227027	0.417875	0.000155066	-0.311527	0.000730716	-0.233306
				Q3UH68	LIMC1_MOUSE	LIM and calponin homology domains-containing protein 1	Limch1	0.0843773	-0.234703	0.18705	-0.477903	0.110787	-0.103348
				P53668	LIMK1_MOUSE	LIM domain kinase 1 (LIMK-1) (EC 2.7.11.1) (KIZ-1)	Limk1	0.0215696	0.198181	0.114335	-0.119205	0.0885255	-0.121884
				Q99JW4	LIMS1_MOUSE	LIM and senescent cell antigen-like-containing domain protein 1 (Particularly interesting new Cys-His protein 1) (PINCH-1)	Lims1	0.474413	0.0301573	0.03484	-0.112511	0.93243	0.0111816
				Q8JZS0	LIN7A_MOUSE	Protein lin-7 homolog A (Lin-7A) (mLin-7) (Mammalian lin-seven protein 1) (MALS-1) (Vertebrate lin-7 homolog 1) (Veli-1)	Lin7a	0.0105027	-0.23911	0.00690722	0.172805	0.0449206	0.158031
				O88952	LIN7C_MOUSE	Protein lin-7 homolog C (Lin-7C) (mLin7C) (Mammalian lin-seven protein 3) (MALS-3) (Vertebrate lin-7 homolog 3) (Veli-3)	Lin7c	0.0669425	-0.110777	0.10159	0.100631	0.828685	-0.0149176
				Q9D1T0	LIGO1_MOUSE	Leucine-rich repeat and immunoglobulin-like domain-containing nogo receptor-interacting protein 1 (Leucine-rich repeat neuronal protein 1) (Leucine-rich repeat neuronal protein 6A)	Lingo1	0.611404	-0.0245121	0.521452	0.100878	0.325135	0.0898886
				Q80Y17	L2GL1_MOUSE	Lethal(2) giant larvae protein homolog 1 (LLGL) (Mgl-1) (Mlgl)	Llgl1	0.00934154	0.218111	0.988125	-0.0010066	0.398738	-0.0234232
				Q9DBH5	LMAN2_MOUSE	Vesicular integral-membrane protein VIP36 (Lectin mannose-binding 2) (Vesicular integral-membrane protein 36) (VIP36)	Lman2	0.633316	0.0158365	0.210221	-0.0997634	0.605059	-0.0317628
				Q8K0B2	LMBD1_MOUSE	Lysosomal cobalamin transport escort protein LMBD1 (LMBD1) (LMBR1 domain-containing protein 1) (Protein N90b)	Lmbrd1	0.682693	0.0246217	0.948845	0.0196323	0.756067	0.0757601
				P48678	LMNA_MOUSE	Prelamin-A/C [Cleaved into: Lamin-A/C]	Lmna	0.0283005	-0.145683	0.0370643	-0.0725636	0.0120598	0.0726342
				P14733	LMNB1_MOUSE	Lamin-B1	Lmnb1	0.089503	-0.0814066	0.64677	0.0126586	0.0945276	0.0758305
+			MC_FC	P21619	LMNB2_MOUSE	Lamin-B2	Lmnb2	0.00575	-0.299612	0.804767	-0.0105295	0.0016675	0.161644
				Q7TQ95	LNP_MOUSE	Endoplasmic reticulum junction formation protein lunapark (ER junction formation factor lunapark) (Protein ulnaless)	Lnp	0.425088	-0.0276034	0.902275	-0.00772166	0.169427	-0.0529327
				Q8C129	LCAP_MOUSE	Leucyl-cystinyl aminopeptidase (Cystinyl aminopeptidase) (EC 3.4.11.3) (Oxytocinase) (OTase)	Lnpep	0.457208	0.030045	0.85589	0.0163329	0.876013	0.00996232
				Q8CGK3	LONM_MOUSE	Lon protease homolog, mitochondrial (EC 3.4.21.53) (Lon protease-like protein) (LONP) (Mitochondrial ATP-dependent protease Lon) (Serine protease 15)	Lonp1	0.14685	0.0647917	0.166056	-0.0458279	0.831361	-0.00722218
				Q6NVG1	LPCT4_MOUSE	Lysophospholipid acyltransferase LPCAT4 (1-acylglycerol-3-phosphate O-acyltransferase 7) (1-AGP acyltransferase 7) (1-AGPAT 7) (1-acylglycerophosphocholine O-acyltransferase) (EC 2.3.1.23) (1-acylglycerophosphoserine O-acyltransferase) (EC 2.3.1.n6) (1-alkenylglycerophosphoethanolamine O-acyltransferase) (EC 2.3.1.121) (1-alkylglycerophosphocholine O-acetyltransferase) (EC 2.3.1.67) (Acyltransfer…	Lpcat4	0.432335	0.0532835	0.750956	-0.0841515	0.525748	-0.0733535
				Q91YX5	LGAT1_MOUSE	Acyl-CoA:lysophosphatidylglycerol acyltransferase 1 (EC 2.3.1.-) (Acyl-CoA:monoacylglycerol acyltransferase LPGAT1) (EC 2.3.1.22)	Lpgat1	0.465833	0.0381918	0.695287	0.0649955	0.716466	0.0469401
				Q80TR1	AGRL1_MOUSE	Adhesion G protein-coupled receptor L1 (Calcium-independent alpha-latrotoxin receptor 1) (CIRL-1) (Latrophilin-1) (Lectomedin-2)	Lphn1	0.0362834	-0.235737	0.875127	-0.0291963	0.798664	0.0463376
				Q80TS3	AGRL3_MOUSE	Adhesion G protein-coupled receptor L3 (Latrophilin-3) (Lectomedin-3)	Lphn3	0.0105907	-0.214492	0.0567423	-0.0636814	0.0530708	0.103751
				Q8BFW7	LPP_MOUSE	Lipoma-preferred partner homolog	Lpp	0.318539	-0.0655692	0.965505	0.0153615	0.973204	0.00645161
				Q7TPB0	PLPR3_MOUSE	Phospholipid phosphatase-related protein type 3 (EC 3.1.3.4) (Lipid phosphate phosphatase-related protein type 3) (Plasticity-related gene 2 protein) (PRG-2)	Lppr3	0.0352671	-0.211442	0.0025497	0.351532	0.196925	0.169508
				Q91ZX7	LRP1_MOUSE	Prolow-density lipoprotein receptor-related protein 1 (LRP-1) (Alpha-2-macroglobulin receptor) (A2MR) (CD antigen CD91) [Cleaved into: Low-density lipoprotein receptor-related protein 1 85 kDa subunit (LRP-85); Low-density lipoprotein receptor-related protein 1 515 kDa subunit (LRP-515); Low-density lipoprotein receptor-related protein 1 intracellular domain (LRPICD)]	Lrp1	0.12797	-0.0704451	0.240333	0.0420842	0.388339	0.0181966
				Q9JI18	LRP1B_MOUSE	Low-density lipoprotein receptor-related protein 1B (LRP-1B) (Low-density lipoprotein receptor-related protein-deleted in tumor) (LRP-DIT)	Lrp1b	0.235534	0.0713727	0.844756	0.0338705	0.673466	0.0445085
				P55302	AMRP_MOUSE	Alpha-2-macroglobulin receptor-associated protein (Alpha-2-MRAP) (Heparin-binding protein 44) (HBP-44) (Low density lipoprotein receptor-related protein-associated protein 1) (RAP)	Lrpap1	0.0266003	-0.184833	0.0963216	0.0927112	0.101708	0.130361
				Q6PB66	LPPRC_MOUSE	Leucine-rich PPR motif-containing protein, mitochondrial (130 kDa leucine-rich protein) (LRP 130) (mLRP130)	Lrpprc	0.109803	0.0777097	0.113596	-0.0647607	0.0150761	-0.0674739
				Q9CRC8	LRC40_MOUSE	Leucine-rich repeat-containing protein 40	Lrrc40	0.173694	-0.0836334	0.36284	0.104221	0.602513	0.0498192
				Q505F5	LRC47_MOUSE	Leucine-rich repeat-containing protein 47	Lrrc47	0.633812	0.0174799	0.434425	0.0612376	0.689394	0.0262442
				Q9D1G5	LRC57_MOUSE	Leucine-rich repeat-containing protein 57	Lrrc57	0.070089	0.10845	0.31246	-0.0499671	0.21996	-0.0420449
				Q922Q8	LRC59_MOUSE	Leucine-rich repeat-containing protein 59 [Cleaved into: Leucine-rich repeat-containing protein 59, N-terminally processed]	Lrrc59	0.235355	0.0436707	0.733802	-0.014009	0.459316	-0.0211241
				Q80WG5	LRC8A_MOUSE	Volume-regulated anion channel subunit LRRC8A (Leucine-rich repeat-containing protein 8A)	Lrrc8a	0.152391	0.0700729	0.254345	0.0739837	0.409762	0.0370264
				Q91WK0	LRRF2_MOUSE	Leucine-rich repeat flightless-interacting protein 2 (LRR FLII-interacting protein 2)	Lrrfip2	0.933432	0.00366211	0.826108	-0.0199912	0.955342	-0.00916314
				Q80ZI6	LRSM1_MOUSE	E3 ubiquitin-protein ligase LRSAM1 (EC 2.3.2.27) (Leucine-rich repeat and sterile alpha motif-containing protein 1) (RING-type E3 ubiquitin transferase LRSAM1) (Tsg101-associated ligase)	Lrsam1	0.4774	0.0321615	0.764649	-0.0455942	0.200091	-0.121645
				Q8BLK3	LSAMP_MOUSE	Limbic system-associated membrane protein (LSAMP)	Lsamp	0.0575986	-0.102243	0.0346729	0.11176	0.0458901	0.0765605
				Q6ZWM4	LSM8_MOUSE	U6 snRNA-associated Sm-like protein LSm8	Lsm8	0.435766	0.0509129	0.224424	-0.21733	0.602513	-0.126584
				P24527	LKHA4_MOUSE	Leukotriene A-4 hydrolase (LTA-4 hydrolase) (EC 3.3.2.6) (Leukotriene A(4) hydrolase) (Tripeptide aminopeptidase LTA4H) (EC 3.4.11.4)	Lta4h	0.610234	-0.0136948	0.966964	0.000781059	0.42114	0.0134249
				Q7TNC4	LC7L2_MOUSE	Putative RNA-binding protein Luc7-like 2 (CGI-74 homolog)	Luc7l2	0.897556	0.00399017	0.917516	0.00985742	0.611867	0.025614
				Q8R4U7	LUZP1_MOUSE	Leucine zipper protein 1 (Leucine zipper motif-containing protein)	Luzp1	0.092128	0.203242	0.321353	-0.232541	0.680552	-0.108053
				P70202	LXN_MOUSE	Latexin (Endogenous carboxypeptidase inhibitor) (ECI) (Tissue carboxypeptidase inhibitor) (TCI)	Lxn	0.011897	-0.233847	0.119956	0.0921507	0.00567533	0.187095
+			MC_FC	Q9WUC3	LY6H_MOUSE	Lymphocyte antigen 6H (Ly-6H)	Ly6h	0.00224	-0.427774	0.00017324	0.227125	0.0198863	0.0991616
				P97823	LYPA1_MOUSE	Acyl-protein thioesterase 1 (APT-1) (EC 3.1.2.-) (Lysophospholipase 1) (Lysophospholipase I) (LPL-I) (LysoPLA I)	Lypla1	0.00873826	0.224711	0.00496868	-0.151467	0.00136822	-0.13968
				Q9WTL7	LYPA2_MOUSE	Acyl-protein thioesterase 2 (APT-2) (EC 3.1.2.-) (Lysophospholipase 2) (Lysophospholipase II) (LPL-II) (LysoPLA II) (mLyso II)	Lypla2	0.0356	0.132888	0.92107	-0.00538182	0.810987	-0.00784922
				Q8K215	LYRM4_MOUSE	LYR motif-containing protein 4	Lyrm4	0.0873292	0.139603	0.384024	-0.121231	0.287238	-0.109944
				Q9DA03	LYRM7_MOUSE	Complex III assembly factor LYRM7 (LYR motif-containing protein 7)	Lyrm7	0.283963	0.0544052	0.661741	-0.0367994	0.816268	0.0271475
				Q9D7V2	LYSM2_MOUSE	LysM and putative peptidoglycan-binding domain-containing protein 2	Lysmd2	0.31936	-0.0690918	0.801921	-0.0479226	0.67698	-0.0903661
				Q8K3C3	LZIC_MOUSE	Protein LZIC (Leucine zipper and CTNNBIP1 domain-containing protein) (Leucine zipper and ICAT homologous domain-containing protein)	Lzic	0.858701	0.00764441	0.783389	-0.0514293	0.619547	0.0224569
				Q9JHQ5	LZTL1_MOUSE	Leucine zipper transcription factor-like protein 1	Lztfl1	0.649107	0.0146861	0.912398	-0.00850391	0.898692	0.00655532
				P24668	MPRD_MOUSE	Cation-dependent mannose-6-phosphate receptor (CD Man-6-P receptor) (CD-MPR) (46 kDa mannose 6-phosphate receptor) (MPR 46)	M6pr	0.19267	-0.0518804	0.928557	0.00341272	0.973204	0.00153804
				Q9QXZ0	MACF1_MOUSE	Microtubule-actin cross-linking factor 1 (Actin cross-linking family 7)	Macf1	0.111624	-0.0692239	0.000730644	0.0709777	0.124331	0.0333157
				Q922B1	MACD1_MOUSE	ADP-ribose glycohydrolase MACROD1 (MACRO domain-containing protein 1) (O-acetyl-ADP-ribose deacetylase MACROD1) (EC 3.1.1.106) (Protein LRP16) ([Protein ADP-ribosylaspartate] hydrolase MACROD1) (EC 3.2.2.-) ([Protein ADP-ribosylglutamate] hydrolase MACROD1) (EC 3.2.2.-)	Macrod1	0.0466376	0.174818	0.138704	-0.124619	0.310442	-0.109828
				Q3UYG8	MACD2_MOUSE	ADP-ribose glycohydrolase MACROD2 (MACRO domain-containing protein 2) (O-acetyl-ADP-ribose deacetylase MACROD2) (EC 3.5.1.-) ([Protein ADP-ribosylaspartate] hydrolase MACROD2) (EC 3.2.2.-) ([Protein ADP-ribosylglutamate] hydrolase MACROD2) (EC 3.2.2.-)	Macrod2	0.559978	0.0227494	0.385135	0.0659924	0.898692	-0.0123973
				Q80U28	MADD_MOUSE	MAP kinase-activating death domain protein (Rab3 GDP/GTP exchange factor)	Madd	0.439821	-0.0336311	0.632016	0.0634282	0.647346	0.0296936
+			MC_FC	P20917	MAG_MOUSE	Myelin-associated glycoprotein (Siglec-4a)	Mag	0.0026988	0.415093	3.30082e-05	-0.282976	0.00205952	-0.240993
				Q9QYH6	MAGD1_MOUSE	Melanoma-associated antigen D1 (Dlxin-1) (MAGE-D1 antigen) (Neurotrophin receptor-interacting MAGE homolog)	Maged1	0.31147	-0.0493879	0.825864	-0.0421498	0.112547	-0.132806
				Q6RHR9	MAGI1_MOUSE	Membrane-associated guanylate kinase, WW and PDZ domain-containing protein 1 (BAI1-associated protein 1) (BAP-1) (Membrane-associated guanylate kinase inverted 1) (MAGI-1)	Magi1	0.0675781	-0.118607	0.0839913	0.0632892	0.173241	0.164172
+			MC_FC	Q8BI08	MAL2_MOUSE	Protein MAL2	Mal2	0.00594667	-0.536453	0.819445	-0.0315678	0.0821531	0.300598
				Q91W89	MA2C1_MOUSE	Alpha-mannosidase 2C1 (EC 3.2.1.24) (Alpha-D-mannoside mannohydrolase) (Mannosidase alpha class 2C member 1) (Neutral/cytosolic alpha-mannosidase)	Man2c1	0.296902	0.065002	0.823456	-0.0408044	0.302724	-0.125632
				Q9CXI5	MANF_MOUSE	Mesencephalic astrocyte-derived neurotrophic factor (Arginine-rich protein) (Protein ARMET)	Manf	0.672901	-0.0185559	0.617301	0.0687079	0.833062	-0.0308776
				Q64133	AOFA_MOUSE	Amine oxidase [flavin-containing] A (EC 1.4.3.4) (Monoamine oxidase type A) (MAO-A)	Maoa	0.0178845	-0.160637	0.000300682	0.136967	0.0268801	0.0525608
+			MC_FC	Q8BW75	AOFB_MOUSE	Amine oxidase [flavin-containing] B (EC 1.4.3.4) (Monoamine oxidase type B) (MAO-B)	Maob	0.00823077	-0.270851	0.0025521	0.193237	0.00188236	0.137013
				Q9QYR6	MAP1A_MOUSE	Microtubule-associated protein 1A (MAP-1A) [Cleaved into: MAP1A heavy chain; MAP1 light chain LC2]	Map1a	0.0182411	0.154795	0.000404546	-0.0880232	0.0145177	-0.0421362
				P14873	MAP1B_MOUSE	Microtubule-associated protein 1B (MAP-1B) (MAP1(X)) (MAP1.2) [Cleaved into: MAP1B heavy chain; MAP1 light chain LC1]	Map1b	0.282146	-0.0354538	0.0334857	-0.0169587	0.21376	-0.0132852
				Q91VR7	MLP3A_MOUSE	Microtubule-associated proteins 1A/1B light chain 3A (Autophagy-related protein LC3 A) (Autophagy-related ubiquitin-like modifier LC3 A) (MAP1 light chain 3-like protein 1) (MAP1A/MAP1B light chain 3 A) (MAP1A/MAP1B LC3 A) (Microtubule-associated protein 1 light chain 3 alpha)	Map1lc3a	0.164311	-0.0588827	0.913361	0.00545263	0.00195178	0.133769
				Q9CQV6	MLP3B_MOUSE	Microtubule-associated proteins 1A/1B light chain 3B (Autophagy-related protein LC3 B) (Autophagy-related ubiquitin-like modifier LC3 B) (MAP1 light chain 3-like protein 2) (MAP1A/MAP1B light chain 3 B) (MAP1A/MAP1B LC3 B) (Microtubule-associated protein 1 light chain 3 beta)	Map1lc3b	0.315344	0.045177	0.498164	-0.0499449	0.562879	0.033479
				Q8C052	MAP1S_MOUSE	Microtubule-associated protein 1S (MAP-1S) (BPY2-interacting protein 1) (Microtubule-associated protein 8) [Cleaved into: MAP1S heavy chain; MAP1S light chain]	Map1s	0.14495	-0.0790076	0.933776	0.0095799	0.925595	0.0141284
				P20357	MTAP2_MOUSE	Microtubule-associated protein 2 (MAP-2)	Map2	0.0155743	-0.166042	0.000162721	0.0944309	0.00181425	0.0633373
				P31938	MP2K1_MOUSE	Dual specificity mitogen-activated protein kinase kinase 1 (MAP kinase kinase 1) (MAPKK 1) (EC 2.7.12.2) (ERK activator kinase 1) (MAPK/ERK kinase 1) (MEK 1)	Map2k1	0.0126306	-0.190259	0.000464126	0.174735	0.000429128	0.175333
				Q63932	MP2K2_MOUSE	Dual specificity mitogen-activated protein kinase kinase 2 (MAP kinase kinase 2) (MAPKK 2) (EC 2.7.12.2) (ERK activator kinase 2) (MAPK/ERK kinase 2) (MEK 2)	Map2k2	0.120401	0.093266	0.480527	0.0638919	0.633058	-0.0240929
				P47809	MP2K4_MOUSE	Dual specificity mitogen-activated protein kinase kinase 4 (MAP kinase kinase 4) (MAPKK 4) (EC 2.7.12.2) (C-JUN N-terminal kinase kinase 1) (JNK kinase 1) (JNKK 1) (JNK-activating kinase 1) (MAPK/ERK kinase 4) (MEK 4) (SAPK/ERK kinase 1) (SEK1)	Map2k4	0.894811	-0.0033493	0.126273	-0.0652385	0.4871	-0.0280917
				Q8CE90	MP2K7_MOUSE	Dual specificity mitogen-activated protein kinase kinase 7 (MAP kinase kinase 7) (MAPKK 7) (EC 2.7.12.2) (JNK-activating kinase 2) (MAPK/ERK kinase 7) (MEK 7) (c-Jun N-terminal kinase kinase 2) (JNK kinase 2) (JNKK 2)	Map2k7	0.692109	-0.0140221	0.531871	0.0447361	0.689255	0.035774
				P27546	MAP4_MOUSE	Microtubule-associated protein 4 (MAP-4)	Map4	0.0127455	0.173511	0.0490646	-0.0426836	0.000545805	-0.109234
				Q61161	M4K2_MOUSE	Mitogen-activated protein kinase kinase kinase kinase 2 (EC 2.7.11.1) (Germinal center kinase) (GCK) (MAPK/ERK kinase kinase kinase 2) (MEK kinase kinase 2) (MEKKK 2) (Rab8-interacting protein)	Map4k2	0.627727	0.0267782	0.115381	-0.122056	0.287792	-0.216551
				Q7TSJ2	MAP6_MOUSE	Microtubule-associated protein 6 (MAP-6) (Stable tubule-only polypeptide) (STOP)	Map6	0.426933	-0.0249052	0.436524	-0.0171695	0.115068	-0.0335827
				Q14BB9	MA6D1_MOUSE	MAP6 domain-containing protein 1 (21 kDa STOP-like protein) (SL21)	Map6d1	0.0227239	0.259879	0.0167418	-0.322327	0.431347	-0.126994
				A2AJI0	MA7D1_MOUSE	MAP7 domain-containing protein 1	Map7d1	0.251075	0.0427406	0.419158	0.0239072	0.490249	0.0212092
				A2AG50	MA7D2_MOUSE	MAP7 domain-containing protein 2	Map7d2	0.111365	0.0741448	0.340393	-0.0303202	0.00567533	-0.111271
				P63085	MK01_MOUSE	Mitogen-activated protein kinase 1 (MAP kinase 1) (MAPK 1) (EC 2.7.11.24) (ERT1) (Extracellular signal-regulated kinase 2) (ERK-2) (MAP kinase isoform p42) (p42-MAPK) (Mitogen-activated protein kinase 2) (MAP kinase 2) (MAPK 2)	Mapk1	0.0192241	-0.155605	6.96823e-05	0.206	0.00201501	0.10989
				Q61831	MK10_MOUSE	Mitogen-activated protein kinase 10 (MAP kinase 10) (MAPK 10) (EC 2.7.11.24) (MAP kinase p49 3F12) (Stress-activated protein kinase JNK3) (c-Jun N-terminal kinase 3)	Mapk10	0.101922	0.084197	0.929483	-0.00500727	0.388177	-0.0416453
+			MC_FC	Q8BH93	MISSL_MOUSE	MAPK-interacting and spindle-stabilizing protein-like (Mitogen-activated protein kinase 1-interacting protein 1-like)	Mapk1ip1l	0.018266	-0.271064	0.132221	0.151591	0.365021	0.139993
				Q63844	MK03_MOUSE	Mitogen-activated protein kinase 3 (MAP kinase 3) (MAPK 3) (EC 2.7.11.24) (ERT2) (Extracellular signal-regulated kinase 1) (ERK-1) (Insulin-stimulated MAP2 kinase) (MAP kinase isoform p44) (p44-MAPK) (MNK1) (Microtubule-associated protein 2 kinase) (p44-ERK1)	Mapk3	0.672444	-0.0140977	0.368535	0.0702136	0.902276	0.00932002
				Q9ESN9	JIP3_MOUSE	C-Jun-amino-terminal kinase-interacting protein 3 (JIP-3) (JNK-interacting protein 3) (JNK MAP kinase scaffold protein 3) (JNK/SAPK-associated protein 1) (JSAP1) (Mitogen-activated protein kinase 8-interacting protein 3) (Sunday driver 2)	Mapk8ip3	0.822434	0.00655723	0.0565333	0.0720806	0.176611	0.062748
				Q9WTU6	MK09_MOUSE	Mitogen-activated protein kinase 9 (MAP kinase 9) (MAPK 9) (EC 2.7.11.24) (Stress-activated protein kinase JNK2) (c-Jun N-terminal kinase 2)	Mapk9	0.0815665	-0.0937278	0.212609	-0.0573041	0.422717	-0.0480428
				Q61166	MARE1_MOUSE	Microtubule-associated protein RP/EB family member 1 (APC-binding protein EB1) (End-binding protein 1) (EB1)	Mapre1	0.152082	-0.069531	0.829711	0.013082	0.923983	0.00561523
				Q8R001	MARE2_MOUSE	Microtubule-associated protein RP/EB family member 2 (APC-binding protein EB2) (End-binding protein 2) (EB2)	Mapre2	0.422423	-0.0265298	0.518042	-0.0300403	0.116769	-0.042901
				Q6PER3	MARE3_MOUSE	Microtubule-associated protein RP/EB family member 3 (EB1 protein family member 3) (EBF3) (End-binding protein 3) (EB3) (RP3)	Mapre3	0.590357	-0.0153718	0.971675	0.0010767	0.462949	-0.0202608
				P10637	TAU_MOUSE	Microtubule-associated protein tau (Neurofibrillary tangle protein) (Paired helical filament-tau) (PHF-tau)	Mapt	0.0397431	-0.128785	0.0105538	0.122161	0.079561	0.0613294
				Q922Q1	MARC2_MOUSE	Mitochondrial amidoxime reducing component 2 (mARC2) (EC 1.7.-.-) (Molybdenum cofactor sulfurase C-terminal domain-containing protein 2) (MOSC domain-containing protein 2) (Moco sulfurase C-terminal domain-containing protein 2)	Marc2	0.459926	0.027775	0.675811	0.0293708	0.979479	0.00145316
				Q3KNM2	MARH5_MOUSE	E3 ubiquitin-protein ligase MARCHF5 (EC 2.3.2.27) (Membrane-associated RING finger protein 5) (Membrane-associated RING-CH protein V) (MARCH-V) (RING-type E3 ubiquitin transferase MARCHF5)	March5	0.355103	-0.0470347	0.628465	-0.0743802	0.970835	-0.00665879
+			MC_FC	P26645	MARCS_MOUSE	Myristoylated alanine-rich C-kinase substrate (MARCKS)	Marcks	0.0036129	-0.486601	0.00523779	0.255046	0.00530085	0.263871
				P28667	MRP_MOUSE	MARCKS-related protein (Brain protein F52) (MARCKS-like protein 1) (Macrophage myristoylated alanine-rich C kinase substrate) (Mac-MARCKS) (MacMARCKS)	Marcksl1	0.0900618	-0.0918405	0.00260754	0.157783	0.0450416	0.122094
				Q8VHJ5	MARK1_MOUSE	Serine/threonine-protein kinase MARK1 (EC 2.7.11.1) (EC 2.7.11.26) (ELKL motif serine/threonine-protein kinase 3) (MAP/microtubule affinity-regulating kinase 1) (PAR1 homolog c) (Par-1c) (mPar-1c)	Mark1	0.422583	-0.0257971	0.78162	0.0109074	0.843137	0.00585938
				Q05512	MARK2_MOUSE	Serine/threonine-protein kinase MARK2 (EC 2.7.11.1) (EC 2.7.11.26) (ELKL motif kinase 1) (EMK-1) (MAP/microtubule affinity-regulating kinase 2) (PAR1 homolog) (PAR1 homolog b) (Par-1b) (mPar-1b)	Mark2	0.0317121	-0.162562	0.764032	-0.0263143	0.884548	-0.0123904
				Q03141	MARK3_MOUSE	MAP/microtubule affinity-regulating kinase 3 (EC 2.7.11.1) (ELKL motif kinase 2) (EMK-2) (MPK-10)	Mark3	0.369117	0.0489502	0.503659	0.104331	0.125194	-0.110043
				Q68FL6	SYMC_MOUSE	Methionine--tRNA ligase, cytoplasmic (EC 6.1.1.10) (Methionyl-tRNA synthetase) (MetRS)	Mars	0.0136746	0.190302	0.961994	0.00260401	0.0116038	-0.0844893
				Q9R1L5	MAST1_MOUSE	Microtubule-associated serine/threonine-protein kinase 1 (EC 2.7.11.1) (Syntrophin-associated serine/threonine-protein kinase)	Mast1	0.349175	0.0422754	0.663212	-0.0564506	0.33287	-0.042052
				Q3THS6	METK2_MOUSE	S-adenosylmethionine synthase isoform type-2 (AdoMet synthase 2) (EC 2.5.1.6) (Methionine adenosyltransferase 2) (MAT 2)	Mat2a	0.3034	-0.0363517	0.578671	-0.0215755	0.389118	-0.0233002
				Q99LB6	MAT2B_MOUSE	Methionine adenosyltransferase 2 subunit beta (Methionine adenosyltransferase II beta) (MAT II beta)	Mat2b	0.0848637	-0.110026	0.772213	-0.0125062	0.6117	0.0398426
				P41242	MATK_MOUSE	Megakaryocyte-associated tyrosine-protein kinase (EC 2.7.10.2) (Protein kinase NTK) (Tyrosine-protein kinase CTK)	Matk	0.107419	-0.125711	0.668687	0.0773888	0.915215	-0.013397
				Q8K310	MATR3_MOUSE	Matrin-3	Matr3	0.0265236	-0.145116	0.676349	-0.0152512	0.0594705	0.0600739
				Q8VCF0	MAVS_MOUSE	Mitochondrial antiviral-signaling protein (MAVS) (CARD adapter inducing interferon beta) (Cardif) (Interferon beta promoter stimulator protein 1) (IPS-1) (Virus-induced-signaling adapter) (VISA)	Mavs	0.190152	0.100821	0.594664	0.109384	0.779744	-0.0639729
				Q8BL86	MBLC2_MOUSE	Metallo-beta-lactamase domain-containing protein 2 (EC 3.-.-.-)	Mblac2	0.224085	-0.0642149	0.902453	0.0130889	0.957085	0.00637484
+			MC_FC	Q9JKP5	MBNL1_MOUSE	Muscleblind-like protein 1 (Triplet-expansion RNA-binding protein)	Mbnl1	0.00977647	0.268408	0.0512382	-0.166701	0.0192077	-0.135732
+			MC_FC	Q8CHK3	MBOA7_MOUSE	Lysophospholipid acyltransferase 7 (LPLAT 7) (EC 2.3.1.-) (1-acylglycerophosphatidylinositol O-acyltransferase) (Bladder and breast carcinoma-overexpressed gene 1 protein) (Leukocyte receptor cluster member 4) (Lysophosphatidylinositol acyltransferase 1) (LPIAT1) (Membrane-bound O-acyltransferase domain-containing protein 7) (O-acyltransferase domain-containing protein 7) (m-mboa-7)	Mboat7	0.00976879	-0.25445	0.0743075	0.108387	0.0432665	0.125075
+			MC_FC	P04370	MBP_MOUSE	Myelin basic protein (MBP) (Myelin A1 protein)	Mbp	0.00155556	0.538445	0.220164	-0.0475283	0.00125471	-0.191276
				Q8R2Y2	MUC18_MOUSE	Cell surface glycoprotein MUC18 (Gicerin) (Melanoma cell adhesion molecule) (Melanoma-associated antigen MUC18) (CD antigen CD146)	Mcam	0.0717423	0.152212	0.209122	-0.157994	0.50806	-0.0671818
				Q99MR8	MCCA_MOUSE	Methylcrotonoyl-CoA carboxylase subunit alpha, mitochondrial (MCCase subunit alpha) (EC 6.4.1.4) (3-methylcrotonyl-CoA carboxylase 1) (3-methylcrotonyl-CoA carboxylase biotin-containing subunit) (3-methylcrotonyl-CoA:carbon dioxide ligase subunit alpha)	Mccc1	0.313872	-0.0368009	0.243966	0.0356989	0.915149	0.00538826
				Q3ULD5	MCCB_MOUSE	Methylcrotonoyl-CoA carboxylase beta chain, mitochondrial (MCCase subunit beta) (EC 6.4.1.4) (3-methylcrotonyl-CoA carboxylase 2) (3-methylcrotonyl-CoA carboxylase non-biotin-containing subunit) (3-methylcrotonyl-CoA:carbon dioxide ligase subunit beta)	Mccc2	0.412733	-0.0269763	0.251149	0.0406709	0.164657	-0.0434492
				Q9D1I5	MCEE_MOUSE	Methylmalonyl-CoA epimerase, mitochondrial (EC 5.1.99.1) (DL-methylmalonyl-CoA racemase)	Mcee	0.105767	0.0997145	0.728247	0.0261695	0.810866	-0.0179305
				Q9DB27	MCTS1_MOUSE	Malignant T-cell-amplified sequence 1 (MCT-1) (Multiple copies T-cell malignancies 1)	Mcts1	0.698368	0.0110424	0.385135	0.0543618	0.930332	-0.00307465
				Q3UMR5	MCU_MOUSE	Calcium uniporter protein, mitochondrial	Mcu	0.659522	-0.012511	0.052286	-0.0943701	0.117758	-0.0547585
				P14152	MDHC_MOUSE	Malate dehydrogenase, cytoplasmic (EC 1.1.1.37) (Cytosolic malate dehydrogenase)	Mdh1	0.0178523	0.153104	0.000875134	-0.0809584	0.000730019	-0.0694737
				P08249	MDHM_MOUSE	Malate dehydrogenase, mitochondrial (EC 1.1.1.37)	Mdh2	0.113522	0.0660076	2.50673e-05	-0.134458	0.226907	-0.025703
				Q9D967	MGDP1_MOUSE	Magnesium-dependent phosphatase 1 (MDP-1) (EC 3.1.3.-) (EC 3.1.3.48)	Mdp1	0.763734	-0.00911212	0.488489	0.0300994	0.48795	-0.051311
				P06801	MAOX_MOUSE	NADP-dependent malic enzyme (NADP-ME) (EC 1.1.1.40) (Malic enzyme 1)	Me1	0.0282634	0.145185	0.257059	-0.0476012	0.00678278	-0.142173
				Q99KE1	MAOM_MOUSE	NAD-dependent malic enzyme, mitochondrial (NAD-ME) (EC 1.1.1.38) (Malic enzyme 2)	Me2	0.0395427	0.142348	0.366206	-0.0562501	0.00758351	-0.112099
+			MC_FC	Q8BMF3	MAON_MOUSE	NADP-dependent malic enzyme, mitochondrial (NADP-ME) (EC 1.1.1.40) (Malic enzyme 3)	Me3	0.00294737	0.405567	0.0104522	-0.168567	0.0172142	-0.143829
				Q9Z2D6	MECP2_MOUSE	Methyl-CpG-binding protein 2 (MeCp-2 protein) (MeCp2)	Mecp2	0.0895789	-0.0821199	0.000591858	0.253542	3.01557e-05	0.245138
+			MC_FC	Q9DCS3	MECR_MOUSE	Enoyl-[acyl-carrier-protein] reductase, mitochondrial (EC 1.3.1.104) (2-enoyl thioester reductase) (Nuclear receptor-binding factor 1) (NRBF-1)	Mecr	0.00971264	0.237991	0.122987	-0.0430679	0.327781	-0.0444953
				O08663	MAP2_MOUSE	Methionine aminopeptidase 2 (MAP 2) (MetAP 2) (EC 3.4.11.18) (Initiation factor 2-associated 67 kDa glycoprotein) (p67) (p67eIF2) (Peptidase M)	Metap2	0.110789	0.103588	0.42162	-0.122214	0.056191	-0.245012
				Q6PCP5	MFF_MOUSE	Mitochondrial fission factor	Mff	0.449815	0.0304811	0.533224	0.0315211	0.673893	0.0360141
+			MC_FC	Q811U4	MFN1_MOUSE	Mitofusin-1 (EC 3.6.5.-) (Transmembrane GTPase MFN1)	Mfn1	0.00932087	0.434227	0.437206	-0.149765	0.242322	-0.170918
				Q80U63	MFN2_MOUSE	Mitofusin-2 (EC 3.6.5.-) (Hypertension-related protein 1) (Mitochondrial assembly regulatory factor) (HSG protein) (Transmembrane GTPase MFN2)	Mfn2	0.375241	-0.0363052	0.886223	-0.00886059	0.314469	0.0632062
				Q9EQQ9	OGA_MOUSE	Protein O-GlcNAcase (OGA) (EC 3.2.1.169) (Beta-N-acetylhexosaminidase) (Beta-hexosaminidase) (Bifunctional protein NCOAT) (Meningioma-expressed antigen 5) (N-acetyl-beta-D-glucosaminidase) (N-acetyl-beta-glucosaminidase)	Mgea5	0.964408	0.00170684	0.817209	0.0362768	0.909791	0.00936961
				O35678	MGLL_MOUSE	Monoglyceride lipase (MGL) (EC 3.1.1.23) (Monoacylglycerol lipase) (MAGL)	Mgll	0.0536558	0.137367	0.126504	0.159552	0.326191	0.0874193
+			MC_FC	Q91VS7	MGST1_MOUSE	Microsomal glutathione S-transferase 1 (Microsomal GST-1) (EC 2.5.1.18) (Microsomal GST-I)	Mgst1	0.00305455	-0.516478	0.132797	0.160264	0.00880877	0.293714
				Q8VC42	RMC1_MOUSE	Regulator of MON1-CCZ1 complex (Colon cancer-associated protein Mic1) (Mic-1)	Mic1	0.0338973	0.235981	0.142715	0.318767	0.851228	0.0297163
				Q8CJ19	MICA3_MOUSE	[F-actin]-monooxygenase MICAL3 (EC 1.14.13.225) (Molecule interacting with CasL protein 3) (MICAL-3)	Mical3	0.124487	0.117484	0.638071	0.102203	0.991124	-0.00221729
+			MC_FC	Q8BGT6	MILK1_MOUSE	MICAL-like protein 1 (Molecule interacting with Rab13) (MIRab13)	Micall1	0.0283393	0.297416	0.965681	-0.0107758	0.196469	-0.233087
				Q9CTY5	MICU3_MOUSE	Calcium uptake protein 3, mitochondrial (EF-hand domain-containing family member A2)	Micu3	0.657263	-0.0153213	0.114335	-0.111313	0.846333	-0.0108571
				P34884	MIF_MOUSE	Macrophage migration inhibitory factor (MIF) (EC 5.3.2.1) (Delayed early response protein 6) (DER6) (Glycosylation-inhibiting factor) (GIF) (L-dopachrome isomerase) (L-dopachrome tautomerase) (EC 5.3.3.12) (Phenylpyruvate tautomerase)	Mif	0.132069	0.087163	0.675554	-0.0399666	0.0058141	-0.206006
				Q9JM52	MINK1_MOUSE	Misshapen-like kinase 1 (EC 2.7.11.1) (GCK family kinase MiNK) (MAPK/ERK kinase kinase kinase 6) (MEK kinase kinase 6) (MEKKK 6) (Misshapen/NIK-related kinase) (Mitogen-activated protein kinase kinase kinase kinase 6)	Mink1	0.135522	-0.0848782	0.862057	-0.0222378	0.677888	0.0897684
				Q7TNS2	MIC10_MOUSE	MICOS complex subunit Mic10 (Mitochondrial inner membrane organizing system protein 1)	Minos1	0.11871	-0.128744	0.0223379	-0.357364	0.57381	-0.0806127
				Q8VHK5	MLC1_MOUSE	Membrane protein MLC1	Mlc1	0.142082	0.0728381	0.0780012	-0.0835044	0.625515	-0.0232372
				Q6ZQI3	MLEC_MOUSE	Malectin	Mlec	0.272608	-0.0430322	0.185769	0.0590632	0.533761	-0.0463197
				Q9QZQ1	AFAD_MOUSE	Afadin (Afadin adherens junction formation factor) (Protein Af-6)	Mllt4	0.0516519	-0.109843	0.00036012	0.15847	0.165075	0.0527828
				Q99J39	DCMC_MOUSE	Malonyl-CoA decarboxylase, mitochondrial (MCD) (EC 4.1.1.9)	Mlycd	0.422153	-0.0327661	0.88665	0.0272524	0.467319	0.107117
				Q9D273	MMAB_MOUSE	Corrinoid adenosyltransferase (EC 2.5.1.17) (Cob(II)alamin adenosyltransferase) (Cob(II)yrinic acid a,c-diamide adenosyltransferase) (Cobinamide/cobalamin adenosyltransferase) (Methylmalonic aciduria type B homolog)	Mmab	0.445662	-0.0363302	0.609572	-0.0648913	0.619419	-0.0538909
				Q9D071	MMS19_MOUSE	MMS19 nucleotide excision repair protein homolog (MET18 homolog) (MMS19-like protein)	Mms19	0.306096	0.0584977	0.875243	-0.0339336	0.926169	-0.0130424
				Q6PEB6	PHOCN_MOUSE	MOB-like protein phocein (Class II mMOB1) (Mob1 homolog 3) (Mob3) (Mps one binder kinase activator-like 3) (Preimplantation protein 3)	Mob4	0.331993	-0.0358706	0.619708	0.0265059	0.125194	0.0614123
+			MC_FC	Q9D2P8	MOBP_MOUSE	Myelin-associated oligodendrocyte basic protein	Mobp	0.00796774	0.265272	0.00364515	-0.152046	0.00372698	-0.157808
				Q9Z224	MOC2A_MOUSE	Molybdopterin synthase sulfur carrier subunit (Molybdenum cofactor synthesis protein 2 small subunit) (Molybdenum cofactor synthesis protein 2A) (MOCS2A) (Sulfur carrier protein MOCS2A)	Mocs2	0.744282	-0.00996232	0.745366	-0.0152779	0.134003	-0.133934
+			MC_FC	A2BDX3	MOCS3_MOUSE	Adenylyltransferase and sulfurtransferase MOCS3 (Molybdenum cofactor synthesis protein 3) [Includes: Molybdopterin-synthase adenylyltransferase (EC 2.7.7.80) (Adenylyltransferase MOCS3) (Sulfur carrier protein MOCS2A adenylyltransferase); Molybdopterin-synthase sulfurtransferase (EC 2.8.1.11) (Sulfur carrier protein MOCS2A sulfurtransferase) (Sulfurtransferase MOCS3)]	Mocs3	0.0104727	-0.804343	0.87848	0.12844	0.757016	0.148017
+			MC_FC	Q61885	MOG_MOUSE	Myelin-oligodendrocyte glycoprotein	Mog	0.007	0.273799	0.000677637	-0.204901	0.000387624	-0.196415
				Q80UM7	MOGS_MOUSE	Mannosyl-oligosaccharide glucosidase (EC 3.2.1.106) (Glucosidase 1) (Glycoprotein-processing glucosidase I)	Mogs	0.159075	0.0773861	0.884422	-0.0361135	0.994932	-0.00132608
				Q80TL7	MON2_MOUSE	Protein MON2 homolog (Protein SF21)	Mon2	0.466556	0.0240545	0.100509	0.0918396	0.475522	-0.0560784
				P56379	ATP68_MOUSE	ATP synthase subunit ATP5MPL, mitochondrial (6.8 kDa mitochondrial proteolipid protein) (MLQ)	Mp68	0.148469	0.0747383	0.0191948	-0.231692	0.00662007	-0.266799
+			MC_FC	P63030	MPC1_MOUSE	Mitochondrial pyruvate carrier 1 (Brain protein 44-like protein)	Mpc1	0.00486957	0.450629	0.289524	-0.153665	0.0303723	-0.184901
+			MC_FC	Q9D023	MPC2_MOUSE	Mitochondrial pyruvate carrier 2 (Brain protein 44)	Mpc2	0.00247059	0.401222	0.000125384	-0.236496	9.00951e-05	-0.189666
+	+		MC_FC;FN_FC	Q3TYA6	MPP8_MOUSE	M-phase phosphoprotein 8	Mphosph8	0	0.884117	0.00496929	-0.589987	0.00222991	0.274988
				Q924M7	MPI_MOUSE	Mannose-6-phosphate isomerase (EC 5.3.1.8) (Phosphohexomutase) (Phosphomannose isomerase) (PMI)	Mpi	0.116697	0.0817771	0.0379228	-0.0653501	0.222776	-0.0715771
				P70290	EM55_MOUSE	55 kDa erythrocyte membrane protein (p55) (Membrane protein, palmitoylated 1)	Mpp1	0.033113	0.135103	0.835041	-0.00769186	0.0257262	-0.0665283
				Q9WV34	MPP2_MOUSE	MAGUK p55 subfamily member 2 (Discs large homolog 2) (Protein MPP2)	Mpp2	0.154206	-0.0649474	0.401483	0.0451939	0.652576	-0.016556
				O88910	MPP3_MOUSE	MAGUK p55 subfamily member 3 (Discs large homolog 3) (Protein MPP3)	Mpp3	0.229585	-0.056366	0.348201	0.0898705	0.15729	0.105723
				Q9JLB2	MPP5_MOUSE	MAGUK p55 subfamily member 5 (Protein associated with Lin-7 1)	Mpp5	0.567906	0.0201998	0.328102	0.107215	0.713768	-0.033885
				Q9JLB0	MPP6_MOUSE	MAGUK p55 subfamily member 6 (Dlgh4 protein) (P55T protein) (Protein associated with Lin-7 2)	Mpp6	0.00938019	-0.228385	0.00360343	0.117137	0.00374263	0.111015
				P97434	MPRIP_MOUSE	Myosin phosphatase Rho-interacting protein (Rho-interacting protein 3) (RIP3) (p116Rip)	Mprip	0.462146	-0.046387	0.607263	0.0793688	0.550304	0.158875
				Q99J99	THTM_MOUSE	3-mercaptopyruvate sulfurtransferase (MST) (EC 2.8.1.2)	Mpst	0.169599	0.0660043	0.655922	-0.034801	0.32254	-0.0639877
				O08989	RASM_MOUSE	Ras-related protein M-Ras (EC 3.6.5.2) (Muscle and microspikes Ras) (Ras-related protein R-Ras3) (X-Ras)	Mras	0.0293387	-0.173298	0.00228068	-0.167245	0.99769	-0.000170469
				Q3TBW2	RM10_MOUSE	39S ribosomal protein L10, mitochondrial (L10mt) (MRP-L10)	Mrpl10	0.214211	0.0694184	0.6975	0.0638542	0.802145	-0.0331988
				Q9DB15	RM12_MOUSE	39S ribosomal protein L12, mitochondrial (L12mt) (MRP-L12)	Mrpl12	0.0774294	0.0919008	0.886214	-0.00410676	0.0361102	-0.109328
				Q9JKF7	RM39_MOUSE	39S ribosomal protein L39, mitochondrial (L39mt) (MRP-L39)	Mrpl39	0.858924	0.00731969	0.585916	0.0755723	0.508818	-0.09745
				Q9DCU6	RM04_MOUSE	39S ribosomal protein L4, mitochondrial (L4mt) (MRP-L4)	Mrpl4	0.0943742	0.102646	0.843219	0.016963	0.81299	-0.0362978
				Q9CQN7	RM41_MOUSE	39S ribosomal protein L41, mitochondrial (L41mt) (MRP-L41)	Mrpl41	0.117409	0.119358	0.996069	-0.00118971	0.903925	0.0173941
				Q9EQI8	RM46_MOUSE	39S ribosomal protein L46, mitochondrial (L46mt) (MRP-L46)	Mrpl46	0.0644849	0.147877	0.817209	0.0345576	0.34413	-0.0864098
				Q8JZS9	RM48_MOUSE	39S ribosomal protein L48, mitochondrial (L48mt) (MRP-L48)	Mrpl48	0.0697845	0.160062	0.640459	0.0515192	0.409762	-0.102991
				Q9CQE3	RT17_MOUSE	28S ribosomal protein S17, mitochondrial (MRP-S17) (S17mt)	Mrps17	0.226697	0.0832348	0.53223	0.153768	0.99163	-0.00200987
				Q9CXW2	RT22_MOUSE	28S ribosomal protein S22, mitochondrial (MRP-S22) (S22mt)	Mrps22	0.0508222	0.148069	0.566454	-0.0608759	0.428986	-0.0753536
				Q80ZS3	RT26_MOUSE	28S ribosomal protein S26, mitochondrial (MRP-S26) (S26mt)	Mrps26	0.0488181	0.127994	0.00805203	-0.14962	0.0223198	-0.138191
				Q8BK72	RT27_MOUSE	28S ribosomal protein S27, mitochondrial (MRP-S27) (S27mt) (Mitochondrial ribosomal protein S27)	Mrps27	0.113526	0.0815151	0.248466	-0.0652702	0.2447	-0.0701599
				Q8BJZ4	RT35_MOUSE	28S ribosomal protein S35, mitochondrial (MRP-S35) (S35mt)	Mrps35	0.0575504	0.181653	0.657594	-0.0893748	0.815498	0.0266438
+			MC_FC	Q9CQX8	RT36_MOUSE	28S ribosomal protein S36, mitochondrial (MRP-S36) (S36mt) (Alpha-ketoglutarate dehydrogenase component 4)	Mrps36	0.00958084	0.255201	0.291741	-0.0833349	0.250206	-0.0503659
				Q80X85	RT07_MOUSE	28S ribosomal protein S7, mitochondrial (MRP-S7) (S7mt)	Mrps7	0.18429	0.0579364	0.245849	-0.114089	0.790578	-0.0217345
				Q9D6S7	RRFM_MOUSE	Ribosome-recycling factor, mitochondrial (RRF) (Ribosome-releasing factor, mitochondrial)	Mrrf	0.113449	0.0768874	0.106232	-0.0776229	0.729683	-0.00887823
				P26041	MOES_MOUSE	Moesin (Membrane-organizing extension spike protein)	Msn	0.169616	0.0735078	0.945633	-0.00657582	0.241988	-0.07249
				Q9D6Y7	MSRA_MOUSE	Mitochondrial peptide methionine sulfoxide reductase (EC 1.8.4.11) (Peptide-methionine (S)-S-oxide reductase) (Peptide Met(O) reductase) (Protein-methionine-S-oxide reductase) (PMSR)	Msra	0.0466544	0.143358	0.0839913	-0.0647852	0.0800742	-0.153409
+			MC_FC	P02802	MT1_MOUSE	Metallothionein-1 (MT-1) (Metallothionein-I) (MT-I)	Mt1	0	-0.777104	0.00361233	0.182843	9.743e-05	0.470579
+			MC_FC	P02798	MT2_MOUSE	Metallothionein-2 (MT-2) (Metallothionein-II) (MT-II)	Mt2	0.00314019	-0.494565	0.0214741	0.161999	0.0067111	0.315715
				P28184	MT3_MOUSE	Metallothionein-3 (MT-3) (Growth inhibitory factor) (GIF) (Metallothionein-III) (MT-III)	Mt3	0.0458939	-0.149801	0.864152	-0.0122581	0.0174573	0.157405
				Q9R190	MTA2_MOUSE	Metastasis-associated protein MTA2 (Metastasis-associated 1-like 1)	Mta2	0.116687	0.103045	0.257865	0.133102	0.734957	-0.0382614
				Q9CQ65	MTAP_MOUSE	S-methyl-5'-thioadenosine phosphorylase (EC 2.4.2.28) (5'-methylthioadenosine phosphorylase) (MTA phosphorylase) (MTAP) (MTAPase)	Mtap	0.0167099	0.206025	0.379875	-0.0557804	0.00325863	-0.122368
				P03930	ATP8_MOUSE	ATP synthase protein 8 (A6L) (F-ATPase subunit 8)	Mtatp8	0.0481737	0.160942	0.771177	-0.0323696	0.399587	-0.0500438
				Q791T5	MTCH1_MOUSE	Mitochondrial carrier homolog 1 (Mitochondrial carrier-like protein 1)	Mtch1	0.123084	-0.0831623	0.978266	-0.00261974	0.120865	-0.111378
				Q791V5	MTCH2_MOUSE	Mitochondrial carrier homolog 2	Mtch2	0.423077	-0.0310788	0.249982	-0.0657787	0.994959	-0.000365973
				P00405	COX2_MOUSE	Cytochrome c oxidase subunit 2 (EC 7.1.1.9) (Cytochrome c oxidase polypeptide II)	Mtco2	0.0179645	0.164597	0.000325502	-0.214287	0.219827	-0.0405688
				Q80WJ7	LYRIC_MOUSE	Protein LYRIC (3D3/LYRIC) (Lysine-rich CEACAM1 co-isolated protein) (Metadherin) (Metastasis adhesion protein)	Mtdh	0.869873	-0.00656676	0.39589	-0.10949	0.483975	-0.0691423
				Q9CRB8	MTFP1_MOUSE	Mitochondrial fission process protein 1 (Mitochondrial 18 kDa protein) (MTP18)	Mtfp1	0.0852483	0.0905304	0.0651058	-0.0799143	0.197529	-0.0722237
				Q9CWE0	MFR1L_MOUSE	Mitochondrial fission regulator 1-like	Mtfr1l	0.338392	-0.0477819	0.674926	-0.0494914	0.497289	0.0342145
				Q922D8	C1TC_MOUSE	C-1-tetrahydrofolate synthase, cytoplasmic (C1-THF synthase) [Cleaved into: C-1-tetrahydrofolate synthase, cytoplasmic, N-terminally processed] [Includes: Methylenetetrahydrofolate dehydrogenase (EC 1.5.1.5); Methenyltetrahydrofolate cyclohydrolase (EC 3.5.4.9); Formyltetrahydrofolate synthetase (EC 6.3.4.3)]	Mthfd1	0.169526	0.0594664	0.913421	-0.00482893	0.38013	-0.0322351
				Q3V3R1	C1TM_MOUSE	Monofunctional C1-tetrahydrofolate synthase, mitochondrial (EC 6.3.4.3) (Formyltetrahydrofolate synthetase)	Mthfd1l	0.18426	0.060286	0.0249597	-0.114914	0.0907336	-0.0599313
+	+		MC_FC;FN_FC	D3YZG8	MTD2L_MOUSE	Probable bifunctional methylenetetrahydrofolate dehydrogenase/cyclohydrolase 2 (NADP-dependent methylenetetrahydrofolate dehydrogenase 2-like protein) (MTHFD2-like) [Includes: NAD-dependent methylenetetrahydrofolate dehydrogenase (EC 1.5.1.15); Methenyltetrahydrofolate cyclohydrolase (EC 3.5.4.9)]	Mthfd2l	0.0138229	0.424413	0.0334857	0.604069	0.0609815	0.577187
+			MC_FC	Q9Z2D1	MTMR2_MOUSE	Myotubularin-related protein 2 (Phosphatidylinositol-3,5-bisphosphate 3-phosphatase) (EC 3.1.3.95) (Phosphatidylinositol-3-phosphate phosphatase) (EC 3.1.3.64)	Mtmr2	0.00693578	0.30724	0.00532104	-0.141232	0.0312639	-0.127025
				Q9Z2D0	MTMR9_MOUSE	Myotubularin-related protein 9 (Inactive phosphatidylinositol 3-phosphatase 9)	Mtmr9	0.79296	0.0115664	0.821248	-0.039583	0.999434	4.8399e-05
				P03888	NU1M_MOUSE	NADH-ubiquinone oxidoreductase chain 1 (EC 7.1.1.2) (NADH dehydrogenase subunit 1)	Mtnd1	0.138832	-0.0771275	0.00750839	-0.199573	0.0182581	-0.16844
				P03899	NU3M_MOUSE	NADH-ubiquinone oxidoreductase chain 3 (EC 7.1.1.2) (NADH dehydrogenase subunit 3)	Mtnd3	0.0188552	0.195807	0.318816	-0.065897	0.636265	-0.0289259
				P03911	NU4M_MOUSE	NADH-ubiquinone oxidoreductase chain 4 (EC 7.1.1.2) (NADH dehydrogenase subunit 4)	Mtnd4	0.0717553	0.104218	0.00713184	-0.210677	0.652258	-0.0256002
				Q9JLN9	MTOR_MOUSE	Serine/threonine-protein kinase mTOR (EC 2.7.11.1) (FK506-binding protein 12-rapamycin complex-associated protein 1) (FKBP12-rapamycin complex-associated protein) (Mammalian target of rapamycin) (mTOR) (Mechanistic target of rapamycin) (Rapamycin target protein 1) (RAPT1)	Mtor	0.165687	-0.0953546	0.830182	-0.0390999	0.699056	0.0336394
				Q9D0D3	PAPD1_MOUSE	Poly(A) RNA polymerase, mitochondrial (PAP) (EC 2.7.7.19) (PAP-associated domain-containing protein 1) (Polynucleotide adenylyltransferase)	Mtpap	0.701822	0.0170188	0.786602	-0.0479479	0.222935	-0.271373
				P62774	MTPN_MOUSE	Myotrophin (Granule cell differentiation protein) (Protein V-1)	Mtpn	0.0317924	-0.158759	0.209122	0.0715137	0.0274722	0.141469
				Q6P9S0	MTSS2_MOUSE	Protein MTSS 2 (MTSS1-like protein)	Mtss1l	0.0695284	-0.108047	0.305551	0.0769989	0.611066	0.0350618
				P47802	MTX1_MOUSE	Metaxin-1 (Mitochondrial outer membrane import complex protein 1)	Mtx1	0.187739	-0.0612466	0.543065	-0.0362937	0.0444979	0.0642946
				O88441	MTX2_MOUSE	Metaxin-2 (Mitochondrial outer membrane import complex protein 2)	Mtx2	0.309642	0.0378397	0.112502	-0.0669713	0.250206	-0.0208268
				Q6JHY2	SMGC_MOUSE	Submandibular gland protein C	Muc19	0.0424112	0.305414	0.342418	0.283398	0.504975	0.146514
				Q8JZM8	MUC4_MOUSE	Mucin-4 (MUC-4) (Ascites sialoglycoprotein) (ASGP) (Pancreatic adenocarcinoma mucin) (Testis mucin) [Cleaved into: Mucin-4 alpha chain (Ascites sialoglycoprotein 1) (ASGP-1); Mucin-4 beta chain (Ascites sialoglycoprotein 2) (ASGP-2)]	Muc4	0.933	0.00262809	0.0189429	0.28605	0.26701	-0.055135
+	+		MC_FC;FN_FC	A2BIM8	MUP18_MOUSE	Major urinary protein 18	Mup9	0.00818824	-0.568718	0.0220056	-0.672837	0.159825	0.289171
				P16332	MUTA_MOUSE	Methylmalonyl-CoA mutase, mitochondrial (MCM) (EC 5.4.99.2) (Methylmalonyl-CoA isomerase)	Mut	0.113665	0.073487	0.372183	-0.0357909	0.164504	-0.0227768
				Q6KAU4	MB12B_MOUSE	Multivesicular body subunit 12B (ESCRT-I complex subunit MVB12B) (Protein FAM125B)	Mvb12b	0.113457	0.129243	0.657945	0.0806563	0.400579	-0.105026
+			MC_FC	Q9R008	KIME_MOUSE	Mevalonate kinase (MK) (EC 2.7.1.36)	Mvk	0.0225331	0.338711	0.196891	0.276203	0.557997	0.168543
				Q9EQK5	MVP_MOUSE	Major vault protein (MVP)	Mvp	0.0347196	0.222669	0.616311	0.070658	0.264045	-0.132411
				O35682	MYADM_MOUSE	Myeloid-associated differentiation marker (Myeloid up-regulated protein)	Myadm	0.360029	0.0983114	0.573124	-0.213607	0.827668	-0.110502
				Q9CPT4	MYDGF_MOUSE	Myeloid-derived growth factor (MYDGF)	Mydgf	0.591488	-0.019352	0.0678091	0.159887	0.439383	-0.0598321
				Q8C854	MYEF2_MOUSE	Myelin expression factor 2 (MEF-2) (MyEF-2)	Myef2	0.144901	-0.0761015	0.829544	0.0139062	0.739243	0.0206234
				Q3U898	CSN9_MOUSE	COP9 signalosome complex subunit 9	Myeov2	0.132598	-0.148289	0.965505	0.0173676	0.552703	0.140825
				Q9JK81	MYG1_MOUSE	MYG1 exonuclease (EC 3.1.-.-) (Protein Gamm1)	Myg1	0.31546	-0.0427806	0.381446	0.0617404	0.107063	0.102876
				Q61879	MYH10_MOUSE	Myosin-10 (Cellular myosin heavy chain, type B) (Myosin heavy chain 10) (Myosin heavy chain, non-muscle IIb) (Non-muscle myosin heavy chain B) (NMMHC-B) (Non-muscle myosin heavy chain IIb) (NMMHC II-b) (NMMHC-IIB)	Myh10	0.301154	0.0356278	0.218689	-0.0257964	0.173241	0.0213814
				O08638	MYH11_MOUSE	Myosin-11 (Myosin heavy chain 11) (Myosin heavy chain, smooth muscle isoform) (SMMHC)	Myh11	0.0183014	-0.218971	0.890638	-0.0101039	0.106887	0.183989
				Q6URW6	MYH14_MOUSE	Myosin-14 (Myosin heavy chain 14) (Myosin heavy chain, non-muscle IIc) (Non-muscle myosin heavy chain IIc) (NMHC II-C)	Myh14	0.0193719	0.17568	0.585101	-0.0265284	0.012296	-0.0718212
				Q8VDD5	MYH9_MOUSE	Myosin-9 (Cellular myosin heavy chain, type A) (Myosin heavy chain 9) (Myosin heavy chain, non-muscle IIa) (Non-muscle myosin heavy chain A) (NMMHC-A) (Non-muscle myosin heavy chain IIa) (NMMHC II-a) (NMMHC-IIA)	Myh9	0.0596934	0.0977302	0.0134972	-0.0589523	0.078419	-0.0363441
				Q3THE2	ML12B_MOUSE	Myosin regulatory light chain 12B (Myosin regulatory light chain 2-B, smooth muscle isoform) (Myosin regulatory light chain 20 kDa) (MLC20) (Myosin regulatory light chain MRLC2)	Myl12b	0.172389	0.0572104	0.343548	-0.042001	0.869239	-0.00661063
				Q60605	MYL6_MOUSE	Myosin light polypeptide 6 (17 kDa myosin light chain) (LC17) (Myosin light chain 3) (MLC-3) (Myosin light chain alkali 3) (Myosin light chain A3) (Smooth muscle and nonmuscle myosin light chain alkali 6)	Myl6	0.22018	0.0485826	0.0407167	-0.0616155	0.0934664	0.0407338
				Q8CI43	MYL6B_MOUSE	Myosin light chain 6B (Smooth muscle and nonmuscle myosin light chain alkali 6B)	Myl6b	0.112359	0.108355	0.0906559	-0.17424	0.612214	-0.0500457
				Q9CQ19	MYL9_MOUSE	Myosin regulatory light polypeptide 9 (Myosin regulatory light chain 2, smooth muscle isoform) (Myosin regulatory light chain 9)	Myl9	0.4395	-0.0528252	0.960893	-0.0237193	0.42114	0.112792
				Q6PDN3	MYLK_MOUSE	Myosin light chain kinase, smooth muscle (MLCK) (smMLCK) (EC 2.7.11.18) (Kinase-related protein) (KRP) (Telokin) [Cleaved into: Myosin light chain kinase, smooth muscle, deglutamylated form]	Mylk	0.0776303	-0.136931	0.213586	-0.0810392	0.721188	-0.0508564
				Q9JMH9	MY18A_MOUSE	Unconventional myosin-XVIIIa (Molecule associated with JAK3 N-terminus) (MAJN) (Myosin containing a PDZ domain) (Surfactant protein receptor SP-R210) (SP-R210)	Myo18a	0.0720156	0.0850954	0.000227186	-0.106994	0.29155	-0.0167704
+			MC_FC	Q5SYD0	MYO1D_MOUSE	Unconventional myosin-Id	Myo1d	0.00230137	0.394071	5.11899e-05	-0.108813	0.000100444	-0.178735
				P70248	MYO1F_MOUSE	Unconventional myosin-If	Myo1f	0.0549576	0.211139	0.969174	0.0105948	0.440998	-0.141361
				Q99104	MYO5A_MOUSE	Unconventional myosin-Va (Dilute myosin heavy chain, non-muscle)	Myo5a	0.3691	-0.0270925	0.122987	0.0207262	0.0170559	0.0500751
				Q64331	MYO6_MOUSE	Unconventional myosin-VI (Protein twist) (Unconventional myosin-6)	Myo6	0.0225348	0.15837	0.260958	-0.0325558	0.527667	-0.0264869
				Q9QY36	NAA10_MOUSE	N-alpha-acetyltransferase 10 (EC 2.3.1.255) (N-terminal acetyltransferase complex ARD1 subunit homolog A) (NatA catalytic subunit Naa10)	Naa10	0.0788713	-0.200491	0.947305	0.0377467	0.407611	0.244549
				Q80UM3	NAA15_MOUSE	N-alpha-acetyltransferase 15, NatA auxiliary subunit (N-terminal acetyltransferase 1) (NMDA receptor-regulated protein 1) (Protein tubedown-1)	Naa15	0.244761	0.0541673	0.56479	0.0292234	0.510749	-0.0424917
				Q60817	NACA_MOUSE	Nascent polypeptide-associated complex subunit alpha (Alpha-NAC) (Alpha-NAC/1.9.2)	Naca	0.311443	0.0370491	0.520734	-0.0148542	0.213902	-0.0493147
+			MC_FC	Q5SWP3	NACAD_MOUSE	NAC-alpha domain-containing protein 1	Nacad	0.00336	0.455704	0.189497	-0.0825036	0.00409534	-0.259202
				Q8C5H8	NAKD2_MOUSE	NAD kinase 2, mitochondrial (EC 2.7.1.23) (Mitochondrial NAD kinase) (NAD kinase domain-containing protein 1, mitochondrial)	Nadk2	0.437858	0.0272589	0.301619	0.0438118	0.730406	-0.0146596
				Q8VBW6	ULA1_MOUSE	NEDD8-activating enzyme E1 regulatory subunit (Amyloid beta precursor protein-binding protein 1, 59 kDa) (APP-BP1) (Amyloid protein-binding protein 1)	Nae1	0.109146	0.0779352	0.666275	-0.0109937	0.495918	-0.0361691
				Q99KQ4	NAMPT_MOUSE	Nicotinamide phosphoribosyltransferase (NAmPRTase) (Nampt) (EC 2.4.2.12) (Pre-B-cell colony-enhancing factor 1 homolog) (PBEF) (Visfatin)	Nampt	0.144779	0.0739441	0.875785	0.0129778	0.351583	-0.0268536
				Q99J77	SIAS_MOUSE	Sialic acid synthase (N-acetylneuraminate-9-phosphate synthase) (EC 2.5.1.57) (N-acetylneuraminic acid phosphate synthase)	Nans	0.0364206	0.140036	0.77381	-0.00749564	0.817313	-0.0123384
				P28656	NP1L1_MOUSE	Nucleosome assembly protein 1-like 1 (Brain protein DN38) (NAP-1-related protein)	Nap1l1	0.0179493	-0.174481	0.0335869	0.104187	0.313853	0.0731108
				Q78ZA7	NP1L4_MOUSE	Nucleosome assembly protein 1-like 4	Nap1l4	0.730598	0.00900412	0.0444625	0.0296373	0.222776	0.0284443
+			MC_FC	Q9JJF0	NP1L5_MOUSE	Nucleosome assembly protein 1-like 5	Nap1l5	0.00466667	-0.383505	0.00139719	0.238091	0.0986306	0.113965
				Q9DB05	SNAA_MOUSE	Alpha-soluble NSF attachment protein (SNAP-alpha) (N-ethylmaleimide-sensitive factor attachment protein alpha)	Napa	0.233636	0.0417538	0.202439	0.0333648	0.222776	0.0294218
				P28663	SNAB_MOUSE	Beta-soluble NSF attachment protein (SNAP-beta) (Brain protein I47) (N-ethylmaleimide-sensitive factor attachment protein beta)	Napb	0.0363357	-0.123698	0.89734	0.00232983	0.00743863	0.0723982
				Q8BH82	NAPEP_MOUSE	N-acyl-phosphatidylethanolamine-hydrolyzing phospholipase D (N-acyl phosphatidylethanolamine phospholipase D) (NAPE-PLD) (NAPE-hydrolyzing phospholipase D) (EC 3.1.4.54)	Napepld	0.0595671	0.178427	0.786602	-0.0554285	0.507319	-0.0695183
				Q9CWZ7	SNAG_MOUSE	Gamma-soluble NSF attachment protein (SNAP-gamma) (N-ethylmaleimide-sensitive factor attachment protein gamma)	Napg	0.0775407	-0.0871563	0.152753	0.0278034	0.0437589	0.0907755
				Q8BP47	SYNC_MOUSE	Asparagine--tRNA ligase, cytoplasmic (EC 6.1.1.22) (Asparaginyl-tRNA synthetase) (AsnRS) (Asparaginyl-tRNA synthetase 1)	Nars	0.0463951	0.11499	0.0842258	-0.0395188	0.00177064	-0.144715
				Q9EPN1	NBEA_MOUSE	Neurobeachin (Lysosomal-trafficking regulator 2)	Nbea	0.0277673	-0.172279	0.31683	-0.0654106	0.0395434	0.0423999
+			MC_FC	Q91X97	NCALD_MOUSE	Neurocalcin-delta	Ncald	0.00339394	-0.368393	0.0362754	0.0880508	0.224026	0.0566852
				P13595	NCAM1_MOUSE	Neural cell adhesion molecule 1 (N-CAM-1) (NCAM-1) (CD antigen CD56)	Ncam1	0.00955224	-0.206668	0.000157994	0.0693278	0.00201501	0.094141
				O35136	NCAM2_MOUSE	Neural cell adhesion molecule 2 (N-CAM-2) (NCAM-2) (Neural cell adhesion molecule RB-8) (R4B12)	Ncam2	0.010509	-0.212652	0.897486	0.00388384	0.00806382	0.108445
				P55066	NCAN_MOUSE	Neurocan core protein (Chondroitin sulfate proteoglycan 3)	Ncan	0.015512	0.187958	0.000337119	-0.332347	0.00170234	-0.130743
				Q9Z0E0	NCDN_MOUSE	Neurochondrin (M-Sema F-associating protein of 75 kDa) (Norbin)	Ncdn	0.387145	-0.0280962	0.00761504	-0.060195	0.156539	-0.0320153
				Q8BLF1	NCEH1_MOUSE	Neutral cholesterol ester hydrolase 1 (NCEH) (EC 3.1.1.-) (Arylacetamide deacetylase-like 1) (Chlorpyrifos oxon-binding protein) (CPO-BP)	Nceh1	0.220561	-0.0570221	0.319986	-0.0578823	0.980409	0.00243473
				Q99M51	NCK1_MOUSE	Cytoplasmic protein NCK1 (NCK adaptor protein 1) (Nck-1)	Nck1	0.382611	0.0354187	0.410683	-0.113454	0.0989296	-0.115476
				P28660	NCKP1_MOUSE	Nck-associated protein 1 (NAP 1) (Brain protein H19) (MH19) (Membrane-associated protein HEM-2) (p125Nap1)	Nckap1	0.031414	-0.141929	0.0328499	0.075171	0.0273508	0.101559
				Q9ESJ4	SPN90_MOUSE	NCK-interacting protein with SH3 domain (54 kDa VacA-interacting protein) (VIP54) (90 kDa N-WASP-interacting protein) (90 kDa SH3 protein interacting with Nck) (SH3 adapter protein SPIN90) (WASP-interacting SH3-domain protein) (WISH) (Wiskott-Aldrich syndrome protein-binding protein) (N-WASP-binding protein)	Nckipsd	0.0490399	0.109407	0.762918	-0.00881696	0.0971969	-0.057899
				P09405	NUCL_MOUSE	Nucleolin (Protein C23)	Ncl	0.0465409	-0.110036	0.158157	-0.0230103	0.0344867	0.0487957
				Q6DFV7	NCOA7_MOUSE	Nuclear receptor coactivator 7	Ncoa7	0.982358	0.000655413	0.99184	-0.00282645	0.0699822	0.152325
				Q8BNY6	NCS1_MOUSE	Neuronal calcium sensor 1 (NCS-1) (Frequenin homolog)	Ncs1	0.0616587	0.130131	0.113681	-0.109324	0.00391872	-0.320774
				P57716	NICA_MOUSE	Nicastrin	Ncstn	0.657342	-0.0131004	0.258175	0.0564129	0.537655	-0.0375061
				Q9ERR1	NDEL1_MOUSE	Nuclear distribution protein nudE-like 1 (Protein mNudE-like) (Protein Nudel) (mNudE-L)	Ndel1	0.714628	-0.0109499	0.254893	0.0866897	0.198128	0.0629847
+			MC_FC	Q62433	NDRG1_MOUSE	Protein NDRG1 (N-myc downstream-regulated gene 1 protein) (Protein Ndr1)	Ndrg1	0.00798222	0.280978	0.0633935	-0.0882339	0.0535608	-0.0820007
				Q9QYG0	NDRG2_MOUSE	Protein NDRG2 (N-myc downstream-regulated gene 2 protein) (Protein Ndr2)	Ndrg2	0.0427709	-0.113194	0.000213279	0.0992475	0.000926707	0.0932403
				Q9QYF9	NDRG3_MOUSE	Protein NDRG3 (N-myc downstream-regulated gene 3 protein) (Protein Ndr3)	Ndrg3	0.163789	0.0614889	0.341193	0.0249996	0.897497	0.00536728
				Q8BTG7	NDRG4_MOUSE	Protein NDRG4 (N-myc downstream-regulated gene 4 protein) (Protein Ndr4)	Ndrg4	0.0149836	0.197197	0.829544	-0.00907183	0.0605762	-0.0929356
				Q99LC3	NDUAA_MOUSE	NADH dehydrogenase [ubiquinone] 1 alpha subcomplex subunit 10, mitochondrial (Complex I-42kD) (CI-42kD) (NADH-ubiquinone oxidoreductase 42 kDa subunit)	Ndufa10	0.0338151	0.131491	0.0158821	-0.0886035	0.497005	-0.0331388
				Q9D8B4	NDUAB_MOUSE	NADH dehydrogenase [ubiquinone] 1 alpha subcomplex subunit 11 (Complex I-B14.7) (CI-B14.7) (NADH-ubiquinone oxidoreductase subunit B14.7)	Ndufa11	0.0794547	-0.108933	0.00794313	-0.31258	0.000149121	-0.494463
				Q7TMF3	NDUAC_MOUSE	NADH dehydrogenase [ubiquinone] 1 alpha subcomplex subunit 12 (Complex I-B17.2) (CI-B17.2) (CIB17.2) (NADH-ubiquinone oxidoreductase subunit B17.2)	Ndufa12	0.0514991	0.127864	0.0242261	-0.124666	0.188904	-0.0712218
				Q9ERS2	NDUAD_MOUSE	NADH dehydrogenase [ubiquinone] 1 alpha subcomplex subunit 13 (Cell death regulatory protein GRIM-19) (Complex I-B16.6) (CI-B16.6) (Gene associated with retinoic and interferon-induced mortality 19 protein) (GRIM-19) (Gene associated with retinoic and IFN-induced mortality 19 protein) (NADH-ubiquinone oxidoreductase B16.6 subunit)	Ndufa13	0.0631825	0.121338	0.0676061	-0.0946665	0.894952	-0.0114536
				Q9CQ75	NDUA2_MOUSE	NADH dehydrogenase [ubiquinone] 1 alpha subcomplex subunit 2 (Complex I-B8) (CI-B8) (NADH-ubiquinone oxidoreductase B8 subunit)	Ndufa2	0.0831597	0.0912185	0.0108199	-0.140866	0.0344867	-0.0771265
				Q9CQ91	NDUA3_MOUSE	NADH dehydrogenase [ubiquinone] 1 alpha subcomplex subunit 3 (Complex I-B9) (CI-B9) (NADH-ubiquinone oxidoreductase B9 subunit)	Ndufa3	0.0850474	0.0879583	0.016225	-0.151593	0.00485473	-0.154965
				Q62425	NDUA4_MOUSE	Cytochrome c oxidase subunit NDUFA4	Ndufa4	0.0292275	0.131647	9.17143e-06	-0.246031	0.00396493	-0.148383
				Q9CPP6	NDUA5_MOUSE	NADH dehydrogenase [ubiquinone] 1 alpha subcomplex subunit 5 (Complex I subunit B13) (Complex I-13kD-B) (CI-13kD-B) (NADH-ubiquinone oxidoreductase 13 kDa-B subunit)	Ndufa5	0.0713628	0.0987926	0.027795	-0.116457	0.287792	-0.0285177
				Q9CQZ5	NDUA6_MOUSE	NADH dehydrogenase [ubiquinone] 1 alpha subcomplex subunit 6 (Complex I-B14) (CI-B14) (NADH-ubiquinone oxidoreductase B14 subunit)	Ndufa6	0.0717524	0.100165	0.000235829	-0.148089	0.159146	-0.0615163
				Q9Z1P6	NDUA7_MOUSE	NADH dehydrogenase [ubiquinone] 1 alpha subcomplex subunit 7 (Complex I-B14.5a) (CI-B14.5a) (NADH-ubiquinone oxidoreductase subunit B14.5a)	Ndufa7	0.052429	0.103874	0.000339713	-0.134599	0.0025878	-0.0636334
				Q9DCJ5	NDUA8_MOUSE	NADH dehydrogenase [ubiquinone] 1 alpha subcomplex subunit 8 (Complex I-19kD) (CI-19kD) (Complex I-PGIV) (CI-PGIV) (NADH-ubiquinone oxidoreductase 19 kDa subunit)	Ndufa8	0.44318	0.0245771	0.00165407	-0.263632	0.00590134	-0.177882
				Q9DC69	NDUA9_MOUSE	NADH dehydrogenase [ubiquinone] 1 alpha subcomplex subunit 9, mitochondrial (Complex I-39kD) (CI-39kD) (NADH-ubiquinone oxidoreductase 39 kDa subunit)	Ndufa9	0.107116	0.0767345	6.67963e-05	-0.181174	0.28159	-0.0410509
				Q9CR21	ACPM_MOUSE	Acyl carrier protein, mitochondrial (ACP) (CI-SDAP) (NADH-ubiquinone oxidoreductase 9.6 kDa subunit)	Ndufab1	0.261909	0.0430069	0.00201271	-0.175446	0.055055	-0.07829
+			MC_FC	Q59J78	NDUF2_MOUSE	NADH dehydrogenase [ubiquinone] 1 alpha subcomplex assembly factor 2 (Mimitin) (Myc-induced mitochondrial protein) (MMTN) (NDUFA12-like protein)	Ndufaf2	0.00786885	0.273381	0.0162381	-0.150256	0.0131524	-0.138173
				Q9JKL4	NDUF3_MOUSE	NADH dehydrogenase [ubiquinone] 1 alpha subcomplex assembly factor 3 (Protein 2P1)	Ndufaf3	0.141278	-0.202375	0.401483	-0.369036	0.931408	0.00931334
				Q9D1H6	NDUF4_MOUSE	NADH dehydrogenase [ubiquinone] 1 alpha subcomplex assembly factor 4 (Hormone-regulated proliferation-associated protein of 20 kDa homolog)	Ndufaf4	0.0506025	0.155293	0.433686	-0.0743489	0.562195	-0.0473552
				A2APY7	NDUF5_MOUSE	Arginine-hydroxylase NDUFAF5, mitochondrial (EC 1.-.-.-) (NADH dehydrogenase [ubiquinone] 1 alpha subcomplex assembly factor 5) (Putative methyltransferase NDUFAF5) (EC 2.1.1.-)	Ndufaf5	0.400448	0.0288501	0.525222	-0.0476656	0.22913	0.0378411
				Q9DCS9	NDUBA_MOUSE	NADH dehydrogenase [ubiquinone] 1 beta subcomplex subunit 10 (Complex I-PDSW) (CI-PDSW) (NADH-ubiquinone oxidoreductase PDSW subunit)	Ndufb10	0.0476121	0.11077	0.00135565	-0.132478	0.00064224	-0.134441
				O09111	NDUBB_MOUSE	NADH dehydrogenase [ubiquinone] 1 beta subcomplex subunit 11, mitochondrial (Complex I-ESSS) (CI-ESSS) (NADH-ubiquinone oxidoreductase ESSS subunit) (Neuronal protein 15.6) (Np15.6) (p15.6)	Ndufb11	0.130524	0.0740762	0.0132454	-0.135904	0.431627	-0.036592
				Q9CQZ6	NDUB3_MOUSE	NADH dehydrogenase [ubiquinone] 1 beta subcomplex subunit 3 (Complex I-B12) (CI-B12) (NADH-ubiquinone oxidoreductase B12 subunit)	Ndufb3	0.107299	0.159226	0.528438	0.133738	0.314469	0.279547
				Q9CQC7	NDUB4_MOUSE	NADH dehydrogenase [ubiquinone] 1 beta subcomplex subunit 4 (Complex I-B15) (CI-B15) (NADH-ubiquinone oxidoreductase B15 subunit)	Ndufb4	0.0562883	0.1133	0.00253939	-0.111402	0.157878	-0.0576549
				Q9CQH3	NDUB5_MOUSE	NADH dehydrogenase [ubiquinone] 1 beta subcomplex subunit 5, mitochondrial (Complex I-SGDH) (CI-SGDH) (NADH-ubiquinone oxidoreductase SGDH subunit)	Ndufb5	0.0615945	0.102751	0.000947362	-0.158971	0.101782	-0.0544105
				Q3UIU2	NDUB6_MOUSE	NADH dehydrogenase [ubiquinone] 1 beta subcomplex subunit 6 (Complex I-B17) (CI-B17) (NADH-ubiquinone oxidoreductase B17 subunit)	Ndufb6	0.552447	0.0259507	0.157052	-0.143065	0.177902	-0.149248
				Q9CR61	NDUB7_MOUSE	NADH dehydrogenase [ubiquinone] 1 beta subcomplex subunit 7 (Complex I-B18) (CI-B18) (NADH-ubiquinone oxidoreductase B18 subunit)	Ndufb7	0.0423201	0.116126	0.00275879	-0.112547	0.00211165	-0.115191
				Q9D6J5	NDUB8_MOUSE	NADH dehydrogenase [ubiquinone] 1 beta subcomplex subunit 8, mitochondrial (Complex I-ASHI) (CI-ASHI) (NADH-ubiquinone oxidoreductase ASHI subunit)	Ndufb8	0.0370664	0.15151	0.104677	-0.0392842	0.574351	-0.0357275
				Q9CQJ8	NDUB9_MOUSE	NADH dehydrogenase [ubiquinone] 1 beta subcomplex subunit 9 (Complex I-B22) (CI-B22) (NADH-ubiquinone oxidoreductase B22 subunit)	Ndufb9	0.0473812	0.113985	0.0189114	-0.0949905	0.698019	-0.0107894
				Q9CQ54	NDUC2_MOUSE	NADH dehydrogenase [ubiquinone] 1 subunit C2 (Complex I-B14.5b) (CI-B14.5b) (NADH-ubiquinone oxidoreductase subunit B14.5b)	Ndufc2	0.0831631	0.0934515	0.0110632	-0.13854	0.168027	-0.0403876
				Q91VD9	NDUS1_MOUSE	NADH-ubiquinone oxidoreductase 75 kDa subunit, mitochondrial (EC 7.1.1.2) (Complex I-75kD) (CI-75kD)	Ndufs1	0.0362934	0.11884	8.85859e-05	-0.128816	0.0183168	-0.0298038
				Q91WD5	NDUS2_MOUSE	NADH dehydrogenase [ubiquinone] iron-sulfur protein 2, mitochondrial (EC 7.1.1.2) (Complex I-49kD) (CI-49kD) (NADH-ubiquinone oxidoreductase 49 kDa subunit)	Ndufs2	0.0582436	0.0977211	7.23966e-05	-0.150292	0.00911588	-0.0350938
				Q9DCT2	NDUS3_MOUSE	NADH dehydrogenase [ubiquinone] iron-sulfur protein 3, mitochondrial (EC 7.1.1.2) (Complex I-30kD) (CI-30kD) (NADH-ubiquinone oxidoreductase 30 kDa subunit)	Ndufs3	0.0300507	0.142892	0.000757626	-0.13308	0.115406	-0.0595856
				Q9CXZ1	NDUS4_MOUSE	NADH dehydrogenase [ubiquinone] iron-sulfur protein 4, mitochondrial (Complex I-18 kDa) (CI-18 kDa) (Complex I-AQDQ) (CI-AQDQ) (NADH-ubiquinone oxidoreductase 18 kDa subunit)	Ndufs4	0.0523713	0.104407	0.000536109	-0.123512	0.0114488	-0.063695
				Q99LY9	NDUS5_MOUSE	NADH dehydrogenase [ubiquinone] iron-sulfur protein 5 (Complex I-15 kDa) (CI-15 kDa) (NADH-ubiquinone oxidoreductase 15 kDa subunit)	Ndufs5	0.0774989	0.0977144	0.0174021	-0.138588	0.00443571	-0.0946326
				P52503	NDUS6_MOUSE	NADH dehydrogenase [ubiquinone] iron-sulfur protein 6, mitochondrial (Complex I-13kD-A) (CI-13kD-A) (NADH-ubiquinone oxidoreductase 13 kDa-A subunit)	Ndufs6	0.0401667	0.14111	0.0216124	-0.117312	0.237396	-0.0555224
				Q9DC70	NDUS7_MOUSE	NADH dehydrogenase [ubiquinone] iron-sulfur protein 7, mitochondrial (EC 7.1.1.2) (Complex I-20kD) (CI-20kD) (NADH-ubiquinone oxidoreductase 20 kDa subunit)	Ndufs7	0.0783452	0.0911407	0.0349066	-0.070127	0.991124	0.000366211
				Q8K3J1	NDUS8_MOUSE	NADH dehydrogenase [ubiquinone] iron-sulfur protein 8, mitochondrial (EC 7.1.1.2) (Complex I-23kD) (CI-23kD) (NADH-ubiquinone oxidoreductase 23 kDa subunit)	Ndufs8	0.0669975	0.0889883	0.000344493	-0.134211	0.00205952	-0.083159
				Q91YT0	NDUV1_MOUSE	NADH dehydrogenase [ubiquinone] flavoprotein 1, mitochondrial (EC 7.1.1.2) (Complex I-51kD) (CI-51kD) (NADH-ubiquinone oxidoreductase 51 kDa subunit)	Ndufv1	0.0505936	0.106202	0.000300682	-0.122171	0.0435758	-0.0355759
				Q9D6J6	NDUV2_MOUSE	NADH dehydrogenase [ubiquinone] flavoprotein 2, mitochondrial (EC 7.1.1.2) (NADH-ubiquinone oxidoreductase 24 kDa subunit)	Ndufv2	0.0778331	0.0827479	0.000251995	-0.123249	0.00695333	-0.0575128
				Q8BK30	NDUV3_MOUSE	NADH dehydrogenase [ubiquinone] flavoprotein 3, mitochondrial (Complex I-9kD) (CI-9kD) (NADH-ubiquinone oxidoreductase 9 kDa subunit)	Ndufv3	0.0362999	0.144852	0.0435706	-0.0867712	0.0455618	-0.103564
				Q9DC07	LNEBL_MOUSE	LIM zinc-binding domain-containing Nebulette (Actin-binding Z-disk protein)	Nebl	0.27501	-0.0474749	0.581312	-0.0333333	0.895357	0.00778913
+			MC_FC	Q8BG18	NECA1_MOUSE	N-terminal EF-hand calcium-binding protein 1 (EF-hand calcium-binding protein 1)	Necab1	0.005575	-0.48942	0.113582	0.182169	0.0821558	0.312915
+			MC_FC	Q91ZP9	NECA2_MOUSE	N-terminal EF-hand calcium-binding protein 2 (EF-hand calcium-binding protein 2) (Neuronal calcium-binding protein 2)	Necab2	0.0036129	-0.427728	0.00236132	0.317063	0.00520563	0.180245
				Q9CR95	NECP1_MOUSE	Adaptin ear-binding coat-associated protein 1 (NECAP endocytosis-associated protein 1) (NECAP-1)	Necap1	0.0474683	-0.105985	0.000751652	0.0750675	0.00173164	0.0772433
				P46935	NEDD4_MOUSE	E3 ubiquitin-protein ligase NEDD4 (EC 2.3.2.26) (HECT-type E3 ubiquitin transferase NEDD4) (Neural precursor cell expressed developmentally down-regulated protein 4) (NEDD-4)	Nedd4	0.238024	0.0512002	0.897018	0.0106041	0.670677	-0.0313289
				Q8CFI0	NED4L_MOUSE	E3 ubiquitin-protein ligase NEDD4-like (EC 2.3.2.26) (HECT-type E3 ubiquitin transferase NED4L) (NEDD4.2) (Nedd4-2)	Nedd4l	0.0536471	-0.159776	0.366206	0.128216	0.130538	0.113329
				P29595	NEDD8_MOUSE	NEDD8 (Neddylin) (Neural precursor cell expressed developmentally down-regulated protein 8) (NEDD-8) (Ubiquitin-like protein Nedd8)	Nedd8	0.429871	0.0391126	0.624157	0.0708051	0.475522	-0.0646586
+			MC_FC	P19246	NFH_MOUSE	Neurofilament heavy polypeptide (NF-H) (200 kDa neurofilament protein) (Neurofilament triplet H protein)	Nefh	0	0.836439	0.00111033	-0.152264	3.51076e-05	-0.383554
+			MC_FC	P08551	NFL_MOUSE	Neurofilament light polypeptide (NF-L) (68 kDa neurofilament protein) (Neurofilament triplet L protein)	Nefl	0	0.76513	0.000289104	-0.197432	5.1553e-06	-0.393005
+			MC_FC	P08553	NFM_MOUSE	Neurofilament medium polypeptide (NF-M) (160 kDa neurofilament protein) (Neurofilament 3) (Neurofilament triplet M protein)	Nefm	0	0.755489	1.62748e-05	-0.185143	8.21749e-06	-0.340739
+			MC_FC	Q80Z24	NEGR1_MOUSE	Neuronal growth regulator 1 (Kindred of IgLON) (Kilon) (Neurotractin)	Negr1	0.00687273	-0.263036	0.00789268	0.120723	0.00201012	0.128082
				Q9CQ45	NENF_MOUSE	Neudesin (Neuron-derived neurotrophic factor) (Secreted protein of unknown function) (SPUF protein)	Nenf	0.0423448	-0.161985	0.675578	0.0402808	0.93243	-0.0119607
				P97798	NEO1_MOUSE	Neogenin	Neo1	0.0394127	-0.138109	0.642063	0.0494795	0.315378	0.0602398
				Q04690	NF1_MOUSE	Neurofibromin (Neurofibromatosis-related protein NF-1)	Nf1	0.116757	-0.067836	0.0502654	0.0684505	0.681932	0.013344
				Q810U3	NFASC_MOUSE	Neurofascin	Nfasc	0.0788879	0.085361	0.000637413	-0.100769	0.0337627	-0.0542369
				Q9Z1J3	NFS1_MOUSE	Cysteine desulfurase, mitochondrial (m-Nfs1) (EC 2.8.1.7)	Nfs1	0.387349	0.0345807	0.732116	0.0251458	0.167526	-0.0752947
				Q9QZ23	NFU1_MOUSE	NFU1 iron-sulfur cluster scaffold homolog, mitochondrial (HIRA-interacting protein 5) (mHIRIP5)	Nfu1	0.670756	0.0131712	0.96644	-0.00193167	0.468298	-0.0333843
+			MC_FC	Q8CHT1	NGEF_MOUSE	Ephexin-1 (Eph-interacting exchange protein) (Neuronal guanine nucleotide exchange factor)	Ngef	0.00357447	-0.544598	0.0864131	-0.184461	0.00367037	0.362479
+			MC_FC	Q9D0T1	NH2L1_MOUSE	NHP2-like protein 1 (Fertilization antigen 1) (FA-1) (High mobility group-like nuclear protein 2 homolog 1) (Sperm-specific antigen 1) (U4/U6.U5 small nuclear ribonucleoprotein SNU13) (U4/U6.U5 tri-snRNP 15.5 kDa protein) [Cleaved into: NHP2-like protein 1, N-terminally processed]	Nhp2l1	0.0117865	-0.247345	0.797365	-0.0260918	0.0378422	0.121775
				Q9EQ80	NIF3L_MOUSE	NIF3-like protein 1	Nif3l1	0.291121	0.0511601	0.892655	0.0153828	0.202512	0.0527034
+			MC_FC	Q8BHK1	NIPA1_MOUSE	Magnesium transporter NIPA1 (Non-imprinted in Prader-Willi/Angelman syndrome region protein 1 homolog)	Nipa1	0.0144947	0.338549	0.64241	-0.0646169	0.305123	-0.241066
				O55125	NIPS1_MOUSE	Protein NipSnap homolog 1 (NipSnap1)	Nipsnap1	0.131876	-0.0697253	0.875603	-0.00816083	0.686764	0.0196106
				Q9CQE1	NPS3B_MOUSE	Protein NipSnap homolog 3B (NipSnap3B) (NipSnap-related protein) (Protein NipSnap homolog 3A) (NipSnap3A)	Nipsnap3b	0.0447883	-0.136468	0.701355	0.0151453	0.51125	-0.0443246
				Q80TM9	NISCH_MOUSE	Nischarin (Imidazoline receptor 1) (I-1) (IR1) (Imidazoline receptor I-1-like protein) (Imidazoline-1 receptor) (I1R)	Nisch	0.0595108	-0.117728	0.187227	0.0865369	0.0217655	0.10925
				Q8VDK1	NIT1_MOUSE	Deaminated glutathione amidase (dGSH amidase) (EC 3.5.1.128) (Nitrilase homolog 1)	Nit1	0.538826	-0.0203526	0.0701221	0.0759826	0.154862	0.0501618
				Q9JHW2	NIT2_MOUSE	Omega-amidase NIT2 (EC 3.5.1.3) (Nitrilase homolog 2)	Nit2	0.503843	-0.0224497	0.862057	0.00954318	0.193575	0.0498037
				Q69ZK9	NLGN2_MOUSE	Neuroligin-2	Nlgn2	0.178622	-0.064934	0.313032	0.0419872	0.449353	0.0440717
				Q8BYM5	NLGN3_MOUSE	Neuroligin-3 (Gliotactin homolog)	Nlgn3	0.0314541	-0.209591	0.481093	-0.0310497	0.486749	-0.171802
				Q91YP2	NEUL_MOUSE	Neurolysin, mitochondrial (EC 3.4.24.16) (Microsomal endopeptidase) (MEP) (Mitochondrial oligopeptidase M) (Neurotensin endopeptidase)	Nln	0.652855	-0.0149946	0.88665	-0.0106945	0.354222	-0.0760288
				P15532	NDKA_MOUSE	Nucleoside diphosphate kinase A (NDK A) (NDP kinase A) (EC 2.7.4.6) (Metastasis inhibition factor NM23) (NDPK-A) (Tumor metastatic process-associated protein) (nm23-M1)	Nme1	0.491462	-0.0202203	0.0745415	0.041822	0.725116	0.0110726
				Q01768	NDKB_MOUSE	Nucleoside diphosphate kinase B (NDK B) (NDP kinase B) (EC 2.7.4.6) (Histidine protein kinase NDKB) (EC 2.7.13.3) (P18) (nm23-M2)	Nme2	0.0282247	-0.147641	0.400921	0.0325437	0.0276308	0.105122
				Q9WV85	NDK3_MOUSE	Nucleoside diphosphate kinase 3 (NDK 3) (NDP kinase 3) (EC 2.7.4.6) (DR-nm23) (Nucleoside diphosphate kinase C) (NDPKC) (nm23-M3)	Nme3	0.07349	-0.118279	0.299086	0.129733	0.412532	0.0620196
+			MC_FC	Q8K2T1	NMRL1_MOUSE	NmrA-like family domain-containing protein 1	Nmral1	0.00583007	0.302372	0.168306	-0.0328579	0.00638005	-0.0975361
				O70310	NMT1_MOUSE	Glycylpeptide N-tetradecanoyltransferase 1 (EC 2.3.1.97) (Myristoyl-CoA:protein N-myristoyltransferase 1) (NMT 1) (Type I N-myristoyltransferase) (Peptide N-myristoyltransferase 1)	Nmt1	0.465891	-0.0229533	0.635164	-0.0266035	0.931408	0.003268
				O70311	NMT2_MOUSE	Glycylpeptide N-tetradecanoyltransferase 2 (EC 2.3.1.97) (Myristoyl-CoA:protein N-myristoyltransferase 2) (NMT 2) (Peptide N-myristoyltransferase 2) (Type II N-myristoyltransferase)	Nmt2	0.217836	-0.0673687	0.332388	-0.0526664	0.863298	0.0189033
				Q9D1X0	NOL3_MOUSE	Nucleolar protein 3 (Apoptosis repressor with CARD)	Nol3	0.206813	0.0639141	0.246488	0.0978026	0.90313	0.00899911
				E9Q5C9	NOLC1_MOUSE	Nucleolar and coiled-body phosphoprotein 1 (140 kDa nucleolar phosphoprotein) (Nopp140)	Nolc1	0.0791175	-0.151695	0.842991	-0.0509198	0.116769	0.187121
				Q6GQT9	NOMO1_MOUSE	Nodal modulator 1	Nomo1	0.0291914	0.1622	0.692535	0.0264173	0.343392	-0.039228
				Q99K48	NONO_MOUSE	Non-POU domain-containing octamer-binding protein (NonO protein)	Nono	0.06646	-0.0978887	0.915263	0.0029552	0.205468	0.0432243
+			MC_FC	Q6DFW4	NOP58_MOUSE	Nucleolar protein 58 (MSSP) (Nucleolar protein 5) (SIK-similar protein)	Nop58	0.00673367	-0.307567	0.0361108	0.0796361	0.0191442	0.165095
+			MC_FC	Q9Z0J4	NOS1_MOUSE	Nitric oxide synthase, brain (EC 1.14.13.39) (Constitutive NOS) (NC-NOS) (NOS type I) (Neuronal NOS) (N-NOS) (nNOS) (Peptidyl-cysteine S-nitrosylase NOS1) (bNOS)	Nos1	0.00618579	-0.348257	0.129055	0.111063	0.0157975	0.122267
				Q9JKN6	NOVA1_MOUSE	RNA-binding protein Nova-1 (Neuro-oncological ventral antigen 1) (Ventral neuron-specific protein 1)	Nova1	0.922275	-0.00303173	0.000637413	-0.246177	0.553871	-0.0348012
				O35604	NPC1_MOUSE	NPC intracellular cholesterol transporter 1 (Niemann-Pick C1 protein)	Npc1	0.14435	0.105569	0.341869	-0.109165	0.585712	-0.116577
				Q9Z0J0	NPC2_MOUSE	NPC intracellular cholesterol transporter 2 (Epididymal secretory protein E1) (mE1) (Niemann Pick type C2 protein homolog)	Npc2	0.0168814	0.20228	0.869033	0.0118072	0.0446435	-0.117413
	+		FN_FC	Q64322	NPDC1_MOUSE	Neural proliferation differentiation and control protein 1 (NPDC-1)	Npdc1	0.0180352	-0.209976	0.000420294	0.425279	0.0662285	0.209661
				Q11011	PSA_MOUSE	Puromycin-sensitive aminopeptidase (PSA) (EC 3.4.11.14) (Cytosol alanyl aminopeptidase) (AAP-S)	Npepps	0.185987	-0.0515862	0.948845	-0.00205564	0.130543	0.043684
				Q9DCJ9	NPL_MOUSE	N-acetylneuraminate lyase (NALase) (EC 4.1.3.3) (N-acetylneuraminate pyruvate-lyase) (N-acetylneuraminic acid aldolase) (Sialate lyase) (Sialate-pyruvate lyase) (Sialic acid aldolase) (Sialic acid lyase)	Npl	0.0672059	0.164957	0.872601	-0.0239539	0.410041	-0.0986328
				P60670	NPL4_MOUSE	Nuclear protein localization protein 4 homolog (Protein NPL4)	Nploc4	0.280209	0.053345	0.771177	-0.0245788	0.247136	-0.0972469
				Q61937	NPM_MOUSE	Nucleophosmin (NPM) (Nucleolar phosphoprotein B23) (Nucleolar protein NO38) (Numatrin)	Npm1	0.0147983	-0.215811	0.921921	-0.00559664	0.187321	0.0763175
				P97300	NPTN_MOUSE	Neuroplastin (Stromal cell-derived receptor 1) (SDR-1)	Nptn	0.85617	-0.00464821	0.00122473	-0.140383	0.0192077	0.080893
				Q62443	NPTX1_MOUSE	Neuronal pentraxin-1 (NP1) (Neuronal pentraxin I) (NP-I)	Nptx1	0.0171091	-0.203556	0.332434	0.0655143	0.00777843	0.133851
+			MC_FC	Q99J85	NPTXR_MOUSE	Neuronal pentraxin receptor	Nptxr	0.00831169	-0.339299	0.196891	0.103816	0.713776	-0.0367393
				Q64669	NQO1_MOUSE	NAD(P)H dehydrogenase [quinone] 1 (EC 1.6.5.2) (Azoreductase) (DT-diaphorase) (DTD) (Menadione reductase) (NAD(P)H:quinone oxidoreductase 1) (Phylloquinone reductase) (Quinone reductase 1) (QR1)	Nqo1	0.077102	0.0930989	0.311826	0.0701606	0.43583	-0.0394409
				Q9JI75	NQO2_MOUSE	Ribosyldihydronicotinamide dehydrogenase [quinone] (EC 1.10.5.1) (NRH dehydrogenase [quinone] 2) (NRH:quinone oxidoreductase 2) (Quinone reductase 2) (QR2)	Nqo2	0.688931	-0.0126572	0.920471	0.0116408	0.851228	0.016396
				P08556	RASN_MOUSE	GTPase NRas (EC 3.6.5.2) (Transforming protein N-Ras)	Nras	0.129988	-0.0820503	0.64241	0.0203807	0.34413	0.0588756
				Q99J45	NRBP_MOUSE	Nuclear receptor-binding protein (HLS7-interacting protein kinase) (MLF1 adapter molecule)	Nrbp1	0.0850927	0.100752	0.130664	-0.0954816	0.900639	-0.00740385
				Q91V36	NRBP2_MOUSE	Nuclear receptor-binding protein 2	Nrbp2	0.269008	-0.0413961	0.0189778	0.084599	0.649834	0.0209186
				Q810U4	NRCAM_MOUSE	Neuronal cell adhesion molecule (Nr-CAM) (Neuronal surface protein Bravo) (mBravo) (NgCAM-related cell adhesion molecule) (Ng-CAM-related)	Nrcam	0.0507695	-0.120535	0.319096	-0.0372012	0.0327011	0.105367
				Q9JHR9	NRIP2_MOUSE	Nuclear receptor-interacting protein 2 (Neuronal-interacting factor X 1)	Nrip2	0.210542	-0.0527177	0.9142	0.00618362	0.854652	0.00901437
				Q9CS84	NRX1A_MOUSE	Neurexin-1 (Neurexin I-alpha) (Neurexin-1-alpha)	Nrxn1	0.0102732	-0.221835	0.564463	-0.0139031	0.180763	0.057735
				Q6P9K9	NRX3A_MOUSE	Neurexin-3 (Neurexin III-alpha) (Neurexin-3-alpha)	Nrxn3	0.0691534	-0.112567	0.0898982	0.0785894	0.327589	0.0570951
				P46460	NSF_MOUSE	Vesicle-fusing ATPase (EC 3.6.4.6) (N-ethylmaleimide-sensitive fusion protein) (NEM-sensitive fusion protein) (Suppressor of K(+) transport growth defect 2) (Protein SKD2) (Vesicular-fusion protein NSF)	Nsf	0.152328	-0.0579591	0.00912089	-0.0544052	0.0119174	0.0596523
				Q9CZ44	NSF1C_MOUSE	NSFL1 cofactor p47 (p97 cofactor p47)	Nsfl1c	0.0900794	-0.0857544	0.00496929	0.0646586	0.722929	0.0148931
				Q9JM14	NT5C_MOUSE	5'(3')-deoxyribonucleotidase, cytosolic type (EC 3.1.3.-) (Cytosolic 5',3'-pyrimidine nucleotidase) (Deoxy-5'-nucleotidase 1) (dNT-1)	Nt5c	0.629097	-0.0153155	0.362147	-0.0455859	0.785054	-0.0135105
				Q3V1L4	5NTC_MOUSE	Cytosolic purine 5'-nucleotidase (EC 3.1.3.5) (Cytosolic 5'-nucleotidase II)	Nt5c2	0.353685	-0.041153	0.486432	-0.0398958	0.536242	-0.0463448
				Q9D020	5NT3A_MOUSE	Cytosolic 5'-nucleotidase 3A (EC 3.1.3.5) (7-methylguanosine phosphate-specific 5'-nucleotidase) (7-methylguanosine nucleotidase) (EC 3.1.3.91) (Cytosolic 5'-nucleotidase 3) (Cytosolic 5'-nucleotidase III) (cN-III) (Lupin) (Pyrimidine 5'-nucleotidase 1) (P5'N-1) (P5N-1) (PN-I)	Nt5c3a	0.0683124	0.129308	0.614623	-0.0666866	0.0385441	-0.122572
				Q3UFY7	5NT3B_MOUSE	7-methylguanosine phosphate-specific 5'-nucleotidase (7-methylguanosine nucleotidase) (EC 3.1.3.91) (Cytosolic 5'-nucleotidase 3B) (Cytosolic 5'-nucleotidase III-like protein) (cN-III-like protein) (EC 3.1.3.5) (N(7)-methylguanylate 5'-phosphatase)	Nt5c3b	0.954446	0.00248003	0.590298	-0.0772142	0.713374	0.046149
				Q3UHB1	NT5D3_MOUSE	5'-nucleotidase domain-containing protein 3 (EC 3.1.3.-) (GRP94-neighboring nucleotidase)	Nt5dc3	0.553743	-0.0299108	0.908026	0.0142806	0.803707	0.0425708
				Q8VCE6	NT5M_MOUSE	5'(3')-deoxyribonucleotidase, mitochondrial (5',3'-nucleotidase, mitochondrial) (EC 3.1.3.-) (Deoxy-5'-nucleotidase 2) (dNT-2)	Nt5m	0.0647973	0.124741	0.203198	-0.173007	0.157439	-0.0717773
+			MC_FC	Q99PJ0	NTRI_MOUSE	Neurotrimin	Ntm	0.0048	-0.328012	0.488489	-0.0191283	0.000554983	0.211147
				P15209	NTRK2_MOUSE	BDNF/NT-3 growth factors receptor (EC 2.7.10.1) (GP145-TrkB/GP95-TrkB) (Trk-B) (Neurotrophic tyrosine kinase receptor type 2) (TrkB tyrosine kinase)	Ntrk2	0.0126878	-0.229145	0.96666	0.00409722	0.0352099	0.168833
				Q02819	NUCB1_MOUSE	Nucleobindin-1 (CALNUC)	Nucb1	0.423705	0.0308583	0.318973	-0.0662291	0.725771	-0.0186963
				Q80XU3	NUCKS_MOUSE	Nuclear ubiquitous casein and cyclin-dependent kinase substrate 1 (JC7)	Nucks1	0.589972	-0.0226128	0.718574	0.0529449	0.139681	0.12051
				O35685	NUDC_MOUSE	Nuclear migration protein nudC (Nuclear distribution protein C homolog) (Silica-induced gene 92 protein) (SIG-92)	Nudc	0.0736608	-0.088171	0.010907	0.0448461	0.222776	0.0335522
				Q6PIP5	NUDC1_MOUSE	NudC domain-containing protein 1	Nudcd1	0.654883	-0.0326273	0.611382	0.132707	0.535531	-0.176914
				Q8R1N4	NUDC3_MOUSE	NudC domain-containing protein 3	Nudcd3	0.0497782	-0.139288	0.882279	0.0104797	0.0971969	0.0913782
				P0C028	NUD11_MOUSE	Diphosphoinositol polyphosphate phosphohydrolase 3-beta (DIPP-3-beta) (DIPP3-beta) (EC 3.6.1.52) (Diadenosine 5',5'''-P1,P6-hexaphosphate hydrolase 3-beta) (Diadenosine hexaphosphate hydrolase (AMP-forming)) (EC 3.6.1.60) (Nucleoside diphosphate-linked moiety X motif 11) (Nudix motif 11)	Nudt11	0.0132719	-0.230471	0.92216	0.00762749	0.0435698	0.095365
				P56380	AP4A_MOUSE	Bis(5'-nucleosyl)-tetraphosphatase [asymmetrical] (EC 3.6.1.17) (Diadenosine 5',5'''-P1,P4-tetraphosphate asymmetrical hydrolase) (Ap4A hydrolase) (Ap4Aase) (Diadenosine tetraphosphatase) (Nucleoside diphosphate-linked moiety X motif 2) (Nudix motif 2)	Nudt2	0.104307	0.0971751	0.409668	-0.0637445	0.733185	-0.0153651
				Q9CQF3	CPSF5_MOUSE	Cleavage and polyadenylation specificity factor subunit 5 (Nucleoside diphosphate-linked moiety X motif 21) (Nudix motif 21) (Nudix hydrolase 21)	Nudt21	0.290745	-0.0622003	0.994752	-0.00198889	0.586286	0.0769608
				Q9JI46	NUDT3_MOUSE	Diphosphoinositol polyphosphate phosphohydrolase 1 (DIPP-1) (muDIPP1) (EC 3.6.1.52) (Diadenosine 5',5'''-P1,P6-hexaphosphate hydrolase 1) (EC 3.6.1.-) (Nucleoside diphosphate-linked moiety X motif 3) (Nudix motif 3)	Nudt3	0.253076	0.045769	0.559065	-0.0314214	0.470702	0.016763
				Q9JKX6	NUDT5_MOUSE	ADP-sugar pyrophosphatase (EC 3.6.1.13) (8-oxo-dGDP phosphatase) (EC 3.6.1.58) (Nuclear ATP-synthesis protein NUDIX5) (EC 2.7.7.96) (Nucleoside diphosphate-linked moiety X motif 5) (Nudix motif 5)	Nudt5	0.0423219	0.257384	0.367902	-0.289577	0.337218	-0.158213
				Q8BVU5	NUDT9_MOUSE	ADP-ribose pyrophosphatase, mitochondrial (EC 3.6.1.13) (ADP-ribose diphosphatase) (ADP-ribose phosphohydrolase) (Adenosine diphosphoribose pyrophosphatase) (ADPR-PPase) (Nucleoside diphosphate-linked moiety X motif 9) (Nudix motif 9)	Nudt9	0.154123	0.093224	0.696025	-0.0525956	0.42664	-0.0847867
				O08919	NUMBL_MOUSE	Numb-like protein	Numbl	0.0180573	-0.195291	0.000629924	0.179846	0.0499897	0.128331
				Q6ZQH8	NU188_MOUSE	Nucleoporin NUP188	Nup188	0.265795	0.0681798	0.54338	-0.163934	0.825085	0.0304093
				Q8BJ71	NUP93_MOUSE	Nuclear pore complex protein Nup93 (93 kDa nucleoporin) (CBP-interacting protein 4) (Nucleoporin Nup93)	Nup93	0.0335099	0.194015	0.647329	0.0578363	0.99769	-0.000300884
				P61971	NTF2_MOUSE	Nuclear transport factor 2 (NTF-2)	Nutf2	0.238877	0.0463917	0.625826	-0.0155261	0.161405	-0.0569863
				P29758	OAT_MOUSE	Ornithine aminotransferase, mitochondrial (EC 2.6.1.13) (Ornithine--oxo-acid aminotransferase)	Oat	0.0463885	-0.118654	0.952853	0.00261831	0.0482539	0.106793
				Q9CRD0	OCAD1_MOUSE	OCIA domain-containing protein 1	Ociad1	0.0792457	0.0892944	0.183637	-0.0345039	0.466178	-0.0174677
				Q6NVF0	OCRL_MOUSE	Inositol polyphosphate 5-phosphatase OCRL (EC 3.1.3.36) (EC 3.1.3.56) (Inositol polyphosphate 5-phosphatase OCRL-1) (Phosphatidylinositol 3,4,5-triphosphate 5-phosphatase) (EC 3.1.3.86)	Ocrl	0.0204895	-0.196229	0.0792014	0.228137	0.0174753	0.138698
				Q60597	ODO1_MOUSE	2-oxoglutarate dehydrogenase, mitochondrial (EC 1.2.4.2) (2-oxoglutarate dehydrogenase complex component E1) (OGDC-E1) (Alpha-ketoglutarate dehydrogenase)	Ogdh	0.0166148	0.153424	1.86808e-06	-0.18735	0.000501932	-0.0940804
				Q8CGY8	OGT1_MOUSE	UDP-N-acetylglucosamine--peptide N-acetylglucosaminyltransferase 110 kDa subunit (EC 2.4.1.255) (O-GlcNAc transferase subunit p110) (O-linked N-acetylglucosamine transferase 110 kDa subunit) (OGT)	Ogt	0.10461	-0.0874016	0.988213	-0.00106359	0.0320826	0.0966082
				Q9CZ30	OLA1_MOUSE	Obg-like ATPase 1 (GTP-binding protein 9)	Ola1	0.35496	-0.0296926	0.185005	-0.0271831	0.542283	0.0069766
				O88998	NOE1_MOUSE	Noelin (Neuronal olfactomedin-related ER localized protein) (Olfactomedin-1) (Pancortin)	Olfm1	0.107232	-0.0966957	0.616311	0.032269	0.991124	-0.00123239
				Q8BM13	NOE2_MOUSE	Noelin-2 (Olfactomedin-2)	Olfm2	0.311437	0.0509317	0.0982987	0.169834	0.257165	-0.0979979
				P63056	NOE3_MOUSE	Noelin-3 (Olfactomedin-3) (Optimedin)	Olfm3	0.561326	0.03881	0.194131	0.215796	0.741195	-0.0870283
				Q63912	OMGP_MOUSE	Oligodendrocyte-myelin glycoprotein	Omg	0.0236271	0.154188	0.000521267	-0.12997	0.0150643	-0.127453
				P58281	OPA1_MOUSE	Dynamin-like 120 kDa protein, mitochondrial (EC 3.6.5.5) (Large GTP-binding protein) (LargeG) (Optic atrophy protein 1 homolog) [Cleaved into: Dynamin-like 120 kDa protein, form S1]	Opa1	0.977023	-0.000671864	0.00514064	-0.0586257	0.13971	0.0187531
				Q505D7	OPA3_MOUSE	Optic atrophy 3 protein homolog	Opa3	0.856111	0.0052712	0.03357	-0.104614	0.989006	0.00132799
+			MC_FC	Q7M750	OPALI_MOUSE	Opalin (Oligodendrocytic myelin paranodal and inner loop protein) (Transmembrane protein 10)	Opalin	0.00781022	0.269526	0.0107134	-0.194496	0.108327	-0.0804386
				Q8K010	OPLA_MOUSE	5-oxoprolinase (EC 3.5.2.9) (5-oxo-L-prolinase) (5-OPase) (Pyroglutamase)	Oplah	0.218054	0.0615938	0.379875	0.049468	0.284507	0.077615
				Q3B7Z2	OSBP1_MOUSE	Oxysterol-binding protein 1	Osbp	0.179215	0.0608139	0.137016	0.0620611	0.993457	0.000708103
+			MC_FC	Q91XL9	OSBL1_MOUSE	Oxysterol-binding protein-related protein 1 (ORP-1) (OSBP-related protein 1)	Osbpl1a	0.0093697	0.23922	0.0105771	-0.140596	0.00836285	-0.151776
				Q8BX94	OSBL2_MOUSE	Oxysterol-binding protein-related protein 2 (ORP-2) (OSBP-related protein 2)	Osbpl2	0.939157	-0.00273132	0.427551	0.0624704	0.391473	-0.0827382
				Q8BXR9	OSBL6_MOUSE	Oxysterol-binding protein-related protein 6 (ORP-6) (OSBP-related protein 6)	Osbpl6	0.0438771	0.146152	0.125634	-0.15781	0.0239294	-0.178717
				B9EJ86	OSBL8_MOUSE	Oxysterol-binding protein-related protein 8 (ORP-8) (OSBP-related protein 8)	Osbpl8	0.132542	-0.122477	0.43056	0.155469	0.28159	0.186473
				Q8BHW2	OSCP1_MOUSE	Protein OSCP1	Oscp1	0.942028	-0.00313377	0.933006	0.0120621	0.954701	-0.0113499
				Q78XF5	OSTC_MOUSE	Oligosaccharyltransferase complex subunit OSTC	Ostc	0.111644	-0.0779481	0.757994	0.0301783	0.191469	0.12383
				Q7TQI3	OTUB1_MOUSE	Ubiquitin thioesterase OTUB1 (EC 3.4.19.12) (Deubiquitinating enzyme OTUB1) (OTU domain-containing ubiquitin aldehyde-binding protein 1) (Otubain-1) (Ubiquitin-specific-processing protease OTUB1)	Otub1	0.202278	0.0468469	0.594638	-0.00585842	0.429089	-0.0160789
				Q8K2H2	OTU6B_MOUSE	Deubiquitinase OTUD6B (OTU domain-containing protein 6B) (EC 3.4.19.12)	Otud6b	0.389769	0.0491738	0.652708	0.0680089	0.712913	0.0502341
+			MC_FC	B2RUR8	OTU7B_MOUSE	OTU domain-containing protein 7B (EC 3.4.19.12) (Cellular zinc finger anti-NF-kappa-B protein) (Zinc finger A20 domain-containing protein 1) (Zinc finger protein Cezanne)	Otud7b	0.00706542	0.434129	0.126389	0.200843	0.446423	-0.103928
+			MC_FC	Q9D0K2	SCOT1_MOUSE	Succinyl-CoA:3-ketoacid coenzyme A transferase 1, mitochondrial (EC 2.8.3.5) (3-oxoacid CoA-transferase 1) (Somatic-type succinyl-CoA:3-oxoacid CoA-transferase) (SCOT-s)	Oxct1	0.00804511	0.237728	0.000569787	-0.113424	0.000730019	-0.141389
				Q8VE38	OXND1_MOUSE	Oxidoreductase NAD-binding domain-containing protein 1 (EC 1.-.-.-)	Oxnad1	0.404215	-0.0450294	0.264944	-0.0823565	0.442784	-0.163557
				Q4KMM3	OXR1_MOUSE	Oxidation resistance protein 1 (Protein C7)	Oxr1	0.422099	-0.0249577	0.000387088	-0.0828338	0.0982672	0.0485659
				Q9D404	OXSM_MOUSE	3-oxoacyl-[acyl-carrier-protein] synthase, mitochondrial (EC 2.3.1.41) (Beta-ketoacyl-ACP synthase)	Oxsm	0.0505547	0.143059	0.879265	0.021364	0.770042	-0.023576
				Q6P9R2	OXSR1_MOUSE	Serine/threonine-protein kinase OSR1 (EC 2.7.11.1) (Oxidative stress-responsive 1 protein)	Oxsr1	0.0557525	0.122071	0.406697	0.0513844	0.716466	0.0485799
				Q9DBN4	P33MX_MOUSE	Putative monooxygenase p33MONOX (EC 1.-.-.-)	P33monox	0.284002	0.0450323	0.355374	-0.109095	0.282191	-0.0772069
				P09103	PDIA1_MOUSE	Protein disulfide-isomerase (PDI) (EC 5.3.4.1) (Cellular thyroid hormone-binding protein) (Endoplasmic reticulum resident protein 59) (ER protein 59) (ERp59) (Prolyl 4-hydroxylase subunit beta) (p55)	P4hb	0.0703899	0.0924597	0.016583	-0.0444436	0.0422602	-0.0569043
				P50580	PA2G4_MOUSE	Proliferation-associated protein 2G4 (IRES-specific cellular trans-acting factor 45 kDa) (ITAF45) (Mpp1) (Proliferation-associated protein 1) (Protein p38-2G4)	Pa2g4	0.878724	-0.0048728	0.99267	0.00123167	0.851605	0.0147161
				P29341	PABP1_MOUSE	Polyadenylate-binding protein 1 (PABP-1) (Poly(A)-binding protein 1)	Pabpc1	0.587769	0.0152764	0.422918	-0.021276	0.475522	0.0163016
				Q8CCS6	PABP2_MOUSE	Polyadenylate-binding protein 2 (PABP-2) (Poly(A)-binding protein 2) (Nuclear poly(A)-binding protein 1) (Poly(A)-binding protein II) (PABII) (Polyadenylate-binding nuclear protein 1)	Pabpn1	0.261501	0.0539923	0.167239	0.12387	0.993457	0.000727177
				Q8K212	PACS1_MOUSE	Phosphofurin acidic cluster sorting protein 1 (PACS-1)	Pacs1	0.00805654	-0.22079	0.00393105	0.101598	0.00476696	0.142092
				Q3V3Q7	PACS2_MOUSE	Phosphofurin acidic cluster sorting protein 2 (PACS-2) (PACS1-like protein)	Pacs2	0.044416	0.138073	0.019583	-0.0741458	0.879319	-0.0131443
				Q61644	PACN1_MOUSE	Protein kinase C and casein kinase substrate in neurons protein 1 (Syndapin-1)	Pacsin1	0.0645389	-0.0957222	0.543065	0.0108614	0.252452	0.0231628
+			MC_FC	Q9WVE8	PACN2_MOUSE	Protein kinase C and casein kinase substrate in neurons protein 2 (Syndapin-2) (Syndapin-II) (SdpII)	Pacsin2	0.00972619	0.248513	0.0917492	-0.102923	0.0272032	-0.161996
+			MC_FC	Q99JB8	PACN3_MOUSE	Protein kinase C and casein kinase II substrate protein 3	Pacsin3	0.0150144	0.301878	0.488489	0.120223	0.874442	-0.0338764
+			MC_FC	Q08642	PADI2_MOUSE	Protein-arginine deiminase type-2 (EC 3.5.3.15) (Peptidylarginine deiminase II) (Protein-arginine deiminase type II)	Padi2	0.00604494	0.366776	0.424731	0.0488172	0.0192077	-0.153041
				P63005	LIS1_MOUSE	Platelet-activating factor acetylhydrolase IB subunit beta (Lissencephaly-1 protein) (LIS-1) (PAF acetylhydrolase 45 kDa subunit) (PAF-AH 45 kDa subunit) (PAF-AH alpha) (PAFAH alpha)	Pafah1b1	0.14752	0.0630498	0.996196	-0.000202656	0.365009	-0.0303235
				Q61206	PA1B2_MOUSE	Platelet-activating factor acetylhydrolase IB subunit alpha2 (EC 3.1.1.47) (PAF acetylhydrolase 30 kDa subunit) (PAF-AH 30 kDa subunit) (PAF-AH subunit beta) (PAFAH subunit beta)	Pafah1b2	0.441107	0.0282924	0.886223	0.0101528	0.448933	0.0662432
				Q61205	PA1B3_MOUSE	Platelet-activating factor acetylhydrolase IB subunit alpha1 (EC 3.1.1.47) (PAF acetylhydrolase 29 kDa subunit) (PAF-AH 29 kDa subunit) (PAF-AH subunit gamma) (PAFAH subunit gamma)	Pafah1b3	0.147702	-0.0678883	0.00821349	0.102174	0.459117	0.0289292
				Q9DCL9	PUR6_MOUSE	Multifunctional protein ADE2 [Includes: Phosphoribosylaminoimidazole-succinocarboxamide synthase (EC 6.3.2.6) (SAICAR synthetase); Phosphoribosylaminoimidazole carboxylase (EC 4.1.1.21) (AIR carboxylase) (AIRC)]	Paics	0.0749169	0.0967855	0.875603	-0.0068469	0.121891	-0.03791
				Q8VE62	PAIP1_MOUSE	Polyadenylate-binding protein-interacting protein 1 (PABP-interacting protein 1) (PAIP-1) (Poly(A)-binding protein-interacting protein 1)	Paip1	0.372034	-0.0379059	0.347524	-0.0550601	0.388177	-0.081485
				O88643	PAK1_MOUSE	Serine/threonine-protein kinase PAK 1 (EC 2.7.11.1) (Alpha-PAK) (CDC42/RAC effector kinase PAK-A) (p21-activated kinase 1) (PAK-1) (p65-PAK)	Pak1	0.0475641	-0.111665	0.538396	-0.00984669	0.0479566	0.0494657
				Q8CIN4	PAK2_MOUSE	Serine/threonine-protein kinase PAK 2 (EC 2.7.11.1) (Gamma-PAK) (p21-activated kinase 2) (PAK-2) [Cleaved into: PAK-2p27; PAK-2p34]	Pak2	0.160002	-0.0616391	0.25313	0.0400786	0.342207	0.0378282
				Q61036	PAK3_MOUSE	Serine/threonine-protein kinase PAK 3 (EC 2.7.11.1) (Beta-PAK) (CDC42/RAC effector kinase PAK-B) (p21-activated kinase 3) (PAK-3)	Pak3	0.0155802	-0.216654	0.0550274	0.13262	0.193245	0.104742
				Q9Z0P4	PALM_MOUSE	Paralemmin-1 (Paralemmin)	Palm	0.0205971	-0.165456	0.0193283	0.114795	0.0130736	0.118781
				Q8BR92	PALM2_MOUSE	Paralemmin-2	Palm2	0.0645781	-0.123634	0.955545	-0.00447083	0.233165	0.0695248
+	+		MC_FC;FN_FC	P97467	AMD_MOUSE	Peptidyl-glycine alpha-amidating monooxygenase (PAM) [Includes: Peptidylglycine alpha-hydroxylating monooxygenase (PHM) (EC 1.14.17.3); Peptidyl-alpha-hydroxyglycine alpha-amidating lyase (EC 4.3.2.5) (Peptidylamidoglycolate lyase) (PAL)]	Pam	0.00929193	-0.242119	3.24748e-05	0.451501	0.0609815	0.0990832
				Q8C0L6	PAOX_MOUSE	Peroxisomal N(1)-acetyl-spermine/spermidine oxidase (EC 1.5.3.13) (Polyamine oxidase)	Paox	0.0489015	0.12174	0.189497	-0.0761623	0.00252216	-0.163081
				Q60967	PAPS1_MOUSE	Bifunctional 3'-phosphoadenosine 5'-phosphosulfate synthase 1 (PAPS synthase 1) (PAPSS 1) (Sulfurylase kinase 1) (SK 1) (SK1) [Includes: Sulfate adenylyltransferase (EC 2.7.7.4) (ATP-sulfurylase) (Sulfate adenylate transferase) (SAT); Adenylyl-sulfate kinase (EC 2.7.1.25) (3'-phosphoadenosine-5'-phosphosulfate synthase) (APS kinase) (Adenosine-5'-phosphosulfate 3'-phosphotransferase) (Adenylylsul…	Papss1	0.100963	0.0931571	0.574482	0.0468166	0.991124	0.00109291
				Q99LX0	PARK7_MOUSE	Parkinson disease protein 7 homolog (Maillard deglycase) (Parkinsonism-associated deglycase) (Protein DJ-1) (DJ-1) (Protein/nucleic acid deglycase DJ-1) (EC 3.1.2.-) (EC 3.5.1.-) (EC 3.5.1.124)	Park7	0.047804	0.105067	0.366206	0.0114255	0.437227	-0.00985765
				Q8CFI5	SYPM_MOUSE	Probable proline--tRNA ligase, mitochondrial (EC 6.1.1.15) (Prolyl-tRNA synthetase) (ProRS)	Pars2	0.0734176	0.194186	0.643996	-0.101596	0.252452	-0.214509
				Q9D0B6	PBDC1_MOUSE	Protein PBDC1 (Polysaccharide biosynthesis domain-containing protein 1)	Pbdc1	0.0399338	-0.17158	0.0788769	0.211455	0.0616778	0.110783
				Q8BSQ9	PB1_MOUSE	Protein polybromo-1 (BRG1-associated factor 180) (BAF180)	Pbrm1	0.136041	-0.101173	0.300581	-0.35141	0.979876	-0.00476265
				Q05920	PYC_MOUSE	Pyruvate carboxylase, mitochondrial (EC 6.4.1.1) (Pyruvic carboxylase) (PCB)	Pc	0.105581	0.0711131	0.000591858	-0.126853	0.807382	0.00587177
				P61458	PHS_MOUSE	Pterin-4-alpha-carbinolamine dehydratase (PHS) (EC 4.2.1.96) (4-alpha-hydroxy-tetrahydropterin dehydratase) (Dimerization cofactor of hepatocyte nuclear factor 1-alpha) (DCoH) (Dimerization cofactor of HNF1) (Phenylalanine hydroxylase-stimulating protein) (Pterin carbinolamine dehydratase) (PCD)	Pcbd1	0.0181774	-0.204239	0.0924676	0.181255	0.18243	0.0968328
				P60335	PCBP1_MOUSE	Poly(rC)-binding protein 1 (Alpha-CP1) (Heterogeneous nuclear ribonucleoprotein E1) (hnRNP E1)	Pcbp1	0.730645	-0.00938892	0.336673	0.0263157	0.790578	0.00502586
				Q61990	PCBP2_MOUSE	Poly(rC)-binding protein 2 (Alpha-CP2) (CTBP) (CBP) (Putative heterogeneous nuclear ribonucleoprotein X) (hnRNP X)	Pcbp2	0.923956	-0.00264454	0.848671	-0.00888252	0.93243	0.00400782
				P57722	PCBP3_MOUSE	Poly(rC)-binding protein 3 (Alpha-CP3)	Pcbp3	0.420503	0.035111	0.923137	0.00762892	0.588217	-0.0506709
				Q91ZA3	PCCA_MOUSE	Propionyl-CoA carboxylase alpha chain, mitochondrial (PCCase subunit alpha) (EC 6.4.1.3) (Propanoyl-CoA:carbon dioxide ligase subunit alpha)	Pcca	0.372184	0.0306649	0.436625	-0.0224304	0.314469	-0.0289588
				Q99MN9	PCCB_MOUSE	Propionyl-CoA carboxylase beta chain, mitochondrial (PCCase subunit beta) (EC 6.4.1.3) (Propanoyl-CoA:carbon dioxide ligase subunit beta)	Pccb	0.276221	0.0403085	0.346803	-0.0150008	0.567697	0.0193157
				Q8BH04	PCKGM_MOUSE	Phosphoenolpyruvate carboxykinase [GTP], mitochondrial (PEPCK-M) (EC 4.1.1.32)	Pck2	0.0838523	-0.103719	0.133192	0.100307	0.685881	-0.0360477
				Q9QYX7	PCLO_MOUSE	Protein piccolo (Aczonin) (Brain-derived HLMN protein) (Multidomain presynaptic cytomatrix protein)	Pclo	0.0311907	-0.135689	0.016947	0.0819349	0.00415729	0.154642
				P23506	PIMT_MOUSE	Protein-L-isoaspartate(D-aspartate) O-methyltransferase (PIMT) (EC 2.1.1.77) (L-isoaspartyl protein carboxyl methyltransferase) (Protein L-isoaspartyl/D-aspartyl methyltransferase) (Protein-beta-aspartate methyltransferase)	Pcmt1	0.258696	0.041049	0.801921	-0.0079298	0.93751	0.0033493
				Q6P8I4	PCNP_MOUSE	PEST proteolytic signal-containing nuclear protein (PCNP) (PEST-containing nuclear protein)	Pcnp	0.613767	0.0170434	0.974648	-0.00205564	0.746072	-0.0213506
				P63054	PCP4_MOUSE	Calmodulin regulator protein PCP4 (Brain-specific antigen PCP-4) (Brain-specific polypeptide PEP-19) (Purkinje cell protein 4)	Pcp4	0.03249	-0.165469	0.0606808	0.0605197	0.00136822	0.39478
				Q6W8Q3	PC4L1_MOUSE	Purkinje cell protein 4-like protein 1 (PCP4-like protein 1)	Pcp4l1	0.0108515	0.223273	0.00103758	-0.21254	0.0289864	0.135536
				Q9QXV0	PCS1N_MOUSE	ProSAAS (IA-4) (Proprotein convertase subtilisin/kexin type 1 inhibitor) (Proprotein convertase 1 inhibitor) (pro-SAAS) [Cleaved into: KEP; Big SAAS (b-SAAS); Little SAAS (l-SAAS); Big PEN-LEN (b-PEN-LEN) (SAAS CT(1-49)); PEN; PEN-20; PEN-19; Little LEN (l-LEN); Big LEN (b-LEN) (SAAS CT(25-40))]	Pcsk1n	0.0192333	-0.157766	3.42029e-05	0.373049	0.0439568	0.0358076
				Q9CQF9	PCYOX_MOUSE	Prenylcysteine oxidase (EC 1.8.3.5)	Pcyox1	0.379613	0.032964	0.130664	0.0787618	0.99769	-0.00011611
				Q8C7K6	PCYXL_MOUSE	Prenylcysteine oxidase-like (EC 1.8.3.-)	Pcyox1l	0.250999	0.0630946	0.636423	0.0592403	0.568392	0.0487893
				Q922E4	PCY2_MOUSE	Ethanolamine-phosphate cytidylyltransferase (EC 2.7.7.14) (CTP:phosphoethanolamine cytidylyltransferase) (Phosphorylethanolamine transferase)	Pcyt2	0.23233	0.0428247	0.0443216	-0.0478554	0.110319	-0.0442371
				Q3UHX2	HAP28_MOUSE	28 kDa heat- and acid-stable phosphoprotein (PDGF-associated protein) (PAP) (PDGFA-associated protein 1) (PAP1)	Pdap1	0.427157	0.0268388	0.426428	0.0371203	0.697373	-0.011076
				Q8VE70	PDC10_MOUSE	Programmed cell death protein 10 (TF-1 cell apoptosis-related protein 15)	Pdcd10	0.49657	0.0244761	0.965505	0.00623155	0.82732	0.0240388
				P56812	PDCD5_MOUSE	Programmed cell death protein 5 (TF-1 cell apoptosis-related protein 19) (Protein TFAR19)	Pdcd5	0.218755	-0.0470138	0.0427478	0.0684342	0.846262	0.00626421
				P12815	PDCD6_MOUSE	Programmed cell death protein 6 (ALG-257) (Apoptosis-linked gene 2 protein) (ALG-2) (PMP41)	Pdcd6	0.0713538	0.114795	0.927412	0.00803971	0.553871	-0.0400372
				Q9WU78	PDC6I_MOUSE	Programmed cell death 6-interacting protein (ALG-2-interacting protein 1) (ALG-2-interacting protein X) (E2F1-inducible protein) (Eig2)	Pdcd6ip	0.305543	0.035213	0.130664	-0.0239244	0.829733	-0.00650644
				Q8BFQ8	GALD1_MOUSE	Glutamine amidotransferase-like class 1 domain-containing protein 1 (Parkinson disease 7 domain-containing protein 1)	Pddc1	0.0764545	-0.108554	0.0100286	0.098989	0.432217	0.0519314
+	+	+	MC_FC;FN_FC;MN_MC	Q8CA95	PDE10_MOUSE	cAMP and cAMP-inhibited cGMP 3',5'-cyclic phosphodiesterase 10A (EC 3.1.4.17) (EC 3.1.4.35)	Pde10a	0.00578286	0.431969	0.000533253	0.783326	3.2598e-05	0.959957
+			MC_FC	Q61481	PDE1A_MOUSE	Calcium/calmodulin-dependent 3',5'-cyclic nucleotide phosphodiesterase 1A (Cam-PDE 1A) (EC 3.1.4.17) (61 kDa Cam-PDE)	Pde1a	0.00644103	-0.363039	0.814817	0.021035	0.0366867	0.137901
				Q01065	PDE1B_MOUSE	Calcium/calmodulin-dependent 3',5'-cyclic nucleotide phosphodiesterase 1B (Cam-PDE 1B) (EC 3.1.4.17) (63 kDa Cam-PDE)	Pde1b	0.0181252	0.19945	0.000677637	0.285647	0.000575105	0.411464
+	+	+	MC_FC;FN_FC;MN_MC	Q922S4	PDE2A_MOUSE	cGMP-dependent 3',5'-cyclic phosphodiesterase (EC 3.1.4.17) (Cyclic GMP-stimulated phosphodiesterase) (CGS-PDE) (cGSPDE)	Pde2a	0.00865085	-0.231918	4.43075e-07	0.623941	5.1553e-06	0.73649
				Q01063	PDE4D_MOUSE	cAMP-specific 3',5'-cyclic phosphodiesterase 4D (EC 3.1.4.53) (DPDE3)	Pde4d	0.0104286	-0.232755	0.24054	0.0677423	0.225074	0.0496645
				O55057	PDE6D_MOUSE	Retinal rod rhodopsin-sensitive cGMP 3',5'-cyclic phosphodiesterase subunit delta (GMP-PDE delta)	Pde6d	0.494495	0.0347006	0.912183	-0.0177374	0.829733	-0.0271022
				O88502	PDE8A_MOUSE	High affinity cAMP-specific and IBMX-insensitive 3',5'-cyclic phosphodiesterase 8A (MmPDE8) (EC 3.1.4.53)	Pde8a	0.0582522	0.300316	0.781408	-0.0779068	0.533676	-0.325298
				P35486	ODPA_MOUSE	Pyruvate dehydrogenase E1 component subunit alpha, somatic form, mitochondrial (EC 1.2.4.1) (PDHE1-A type I)	Pdha1	0.0229451	0.154528	0.00260754	-0.145609	0.00593203	-0.0887847
				Q9D051	ODPB_MOUSE	Pyruvate dehydrogenase E1 component subunit beta, mitochondrial (PDHE1-B) (EC 1.2.4.1)	Pdhb	0.028033	0.146563	0.00169506	-0.149092	0.0101925	-0.0708013
				Q8BKZ9	ODPX_MOUSE	Pyruvate dehydrogenase protein X component, mitochondrial (Dihydrolipoamide dehydrogenase-binding protein of pyruvate dehydrogenase complex) (Lipoyl-containing pyruvate dehydrogenase complex component X)	Pdhx	0.0335332	0.134614	0.000395865	-0.119402	0.897497	-0.00627279
				P27773	PDIA3_MOUSE	Protein disulfide-isomerase A3 (EC 5.3.4.1) (58 kDa glucose-regulated protein) (58 kDa microsomal protein) (p58) (Disulfide isomerase ER-60) (Endoplasmic reticulum resident protein 57) (ER protein 57) (ERp57) (Endoplasmic reticulum resident protein 60) (ER protein 60) (ERp60)	Pdia3	0.9381	-0.00196981	0.483717	0.0146646	0.366662	0.0204825
				P08003	PDIA4_MOUSE	Protein disulfide-isomerase A4 (EC 5.3.4.1) (Endoplasmic reticulum resident protein 72) (ER protein 72) (ERp-72) (ERp72)	Pdia4	0.433224	0.0264435	0.0102005	0.104611	0.879479	-0.00609779
				Q922R8	PDIA6_MOUSE	Protein disulfide-isomerase A6 (EC 5.3.4.1) (Thioredoxin domain-containing protein 7)	Pdia6	0.0768663	-0.0970621	0.377275	0.0366371	0.954814	0.00177884
				Q9JK42	PDK2_MOUSE	[Pyruvate dehydrogenase (acetyl-transferring)] kinase isozyme 2, mitochondrial (EC 2.7.11.2) (Pyruvate dehydrogenase kinase isoform 2) (PDH kinase 2)	Pdk2	0.0494792	0.116268	0.00247452	-0.145471	0.0141645	-0.120803
				Q922H2	PDK3_MOUSE	[Pyruvate dehydrogenase (acetyl-transferring)] kinase isozyme 3, mitochondrial (EC 2.7.11.2) (Pyruvate dehydrogenase kinase isoform 3)	Pdk3	0.117391	0.0736711	0.00100248	-0.166276	0.11913	-0.0642784
				Q9Z2A0	PDPK1_MOUSE	3-phosphoinositide-dependent protein kinase 1 (mPDK1) (EC 2.7.11.1)	Pdpk1	0.190137	-0.0595415	0.271461	-0.0591166	0.761791	0.014888
				Q7TSQ8	PDPR_MOUSE	Pyruvate dehydrogenase phosphatase regulatory subunit, mitochondrial (PDPr)	Pdpr	0.0834389	0.159924	0.374427	-0.185547	0.09348	-0.240709
				Q99K01	PDXD1_MOUSE	Pyridoxal-dependent decarboxylase domain-containing protein 1 (EC 4.1.1.-)	Pdxdc1	0.821203	0.0065856	0.779734	-0.0192218	0.100287	-0.0966065
				Q8K183	PDXK_MOUSE	Pyridoxal kinase (EC 2.7.1.35) (Pyridoxine kinase)	Pdxk	0.0167419	-0.167423	0.000464126	0.129977	0.010224	0.0930047
				P60487	PLPP_MOUSE	Pyridoxal phosphate phosphatase (PLP phosphatase) (EC 3.1.3.3) (EC 3.1.3.74) (Chronophin)	Pdxp	0.0156157	-0.203425	0.115725	0.120678	0.00632338	0.0964928
	+		FN_FC	O35417	PDYN_MOUSE	Proenkephalin-B (Beta-neoendorphin-dynorphin) (Preprodynorphin) [Cleaved into: Alpha-neoendorphin; Beta-neoendorphin; Big dynorphin (Big Dyn); Dynorphin A(1-17) (Dyn-A17) (Dynorphin A); Dynorphin A(1-13); Dynorphin A(1-8); Leu-enkephalin; Rimorphin (Dynorphin B) (Dyn-B) (Dynorphin B(1-13)); Leumorphin (Dynorphin B-29)]	Pdyn	0.0487772	0.167907	0.000311694	1.27783	0.00101658	0.57284
				Q62048	PEA15_MOUSE	Astrocytic phosphoprotein PEA-15 (15 kDa phosphoprotein enriched in astrocytes)	Pea15	0.769329	-0.00839972	0.00057694	0.175397	0.187321	0.0564029
				P70296	PEBP1_MOUSE	Phosphatidylethanolamine-binding protein 1 (PEBP-1) (HCNPpp) [Cleaved into: Hippocampal cholinergic neurostimulating peptide (HCNP)]	Pebp1	0.599651	0.0147581	0.0844895	-0.0352211	0.00626303	-0.097681
				Q8BFY6	PEF1_MOUSE	Peflin (PEF protein with a long N-terminal hydrophobic domain) (Penta-EF hand domain-containing protein 1)	Pef1	0.253097	0.0605826	0.794089	0.0424078	0.186468	-0.0929623
				Q80X73	PELO_MOUSE	Protein pelota homolog (EC 3.1.-.-)	Pelo	0.185637	0.105043	0.863799	-0.0371571	0.652258	-0.0913982
	+		FN_FC	P22005	PENK_MOUSE	Proenkephalin-A [Cleaved into: Synenkephalin; Met-enkephalin (Opioid growth factor) (OGF); PENK(114-133); PENK(143-184); Met-enkephalin-Arg-Ser-Leu; Leu-enkephalin; PENK(238-259); Met-enkephalin-Arg-Phe]	Penk	0.0865355	-0.0861921	4.96839e-05	0.532182	0.11621	-0.0410464
				Q11136	PEPD_MOUSE	Xaa-Pro dipeptidase (X-Pro dipeptidase) (EC 3.4.13.9) (Imidodipeptidase) (Peptidase 4) (Peptidase D) (Proline dipeptidase) (Prolidase)	Pepd	0.19164	-0.0654356	0.801921	-0.0388231	0.652258	-0.01211
				Q9R0A0	PEX14_MOUSE	Peroxisomal membrane protein PEX14 (PTS1 receptor-docking protein) (Peroxin-14) (Peroxisomal membrane anchor protein PEX14)	Pex14	0.41719	0.0286589	0.712321	-0.0226226	0.310217	-0.0459781
				Q8VCI5	PEX19_MOUSE	Peroxisomal biogenesis factor 19 (Peroxin-19) (Peroxisomal farnesylated protein) (PxF)	Pex19	0.18703	0.0948181	0.489492	0.110458	0.366662	0.223214
				O09012	PEX5_MOUSE	Peroxisomal targeting signal 1 receptor (PTS1 receptor) (PTS1R) (PTS1-BP) (PXR1P) (Peroxin-5) (Peroxisomal C-terminal targeting signal import receptor) (Peroxisome receptor 1)	Pex5	0.17812	-0.106968	0.819445	-0.056334	0.814926	0.0456951
+			MC_FC	Q8C437	PEX5R_MOUSE	PEX5-related protein (PEX2-related protein) (PEX5-like protein) (Peroxin-5-related protein) (Tetratricopeptide repeat-containing Rab8b-interacting protein) (Pex5Rp) (TRIP8b)	Pex5l	0.003584	0.364074	0.00119751	-0.259044	0.00984626	-0.14107
				Q5SUR0	PUR4_MOUSE	Phosphoribosylformylglycinamidine synthase (FGAM synthase) (FGAMS) (EC 6.3.5.3) (Formylglycinamide ribonucleotide amidotransferase) (FGAR amidotransferase) (FGAR-AT) (Formylglycinamide ribotide amidotransferase)	Pfas	0.0858164	-0.100947	0.297171	-0.0678325	0.80751	-0.0309081
				Q9CWM4	PFD1_MOUSE	Prefoldin subunit 1	Pfdn1	0.253079	-0.0446537	0.201957	0.0400913	0.219117	0.0635698
				O70591	PFD2_MOUSE	Prefoldin subunit 2	Pfdn2	0.084	-0.0805371	0.00385448	0.0631089	0.728582	-0.00702977
				Q9WU28	PFD5_MOUSE	Prefoldin subunit 5 (EIG-1) (Myc modulator 1) (c-Myc-binding protein Mm-1)	Pfdn5	0.0401227	-0.12135	0.0498491	0.0437195	0.0215577	0.0641034
				Q03958	PFD6_MOUSE	Prefoldin subunit 6 (Protein Ke2)	Pfdn6	0.68158	0.0221593	0.977684	0.00949383	0.0623813	0.297702
				P70265	F262_MOUSE	6-phosphofructo-2-kinase/fructose-2,6-bisphosphatase 2 (6PF-2-K/Fru-2,6-P2ase 2) (PFK/FBPase 2) (6PF-2-K/Fru-2,6-P2ase heart-type isozyme) [Includes: 6-phosphofructo-2-kinase (EC 2.7.1.105); Fructose-2,6-bisphosphatase (EC 3.1.3.46)]	Pfkfb2	0.103169	-0.167273	0.650656	-0.106538	0.219262	0.217157
				P12382	PFKAL_MOUSE	ATP-dependent 6-phosphofructokinase, liver type (ATP-PFK) (PFK-L) (EC 2.7.1.11) (6-phosphofructokinase type B) (Phosphofructo-1-kinase isozyme B) (PFK-B) (Phosphohexokinase)	Pfkl	0.423354	-0.0266767	0.56692	-0.0226121	0.0458065	-0.0741343
				P47857	PFKAM_MOUSE	ATP-dependent 6-phosphofructokinase, muscle type (ATP-PFK) (PFK-M) (EC 2.7.1.11) (6-phosphofructokinase type A) (Phosphofructo-1-kinase isozyme A) (PFK-A) (Phosphohexokinase)	Pfkm	0.0215746	0.144561	0.00212583	-0.0767574	0.00706621	-0.0521393
				Q9WUA3	PFKAP_MOUSE	ATP-dependent 6-phosphofructokinase, platelet type (ATP-PFK) (PFK-P) (EC 2.7.1.11) (6-phosphofructokinase type C) (Phosphofructo-1-kinase isozyme C) (PFK-C) (Phosphohexokinase)	Pfkp	0.0521585	0.100746	0.0060899	-0.0668259	0.0397712	-0.018003
				P62962	PROF1_MOUSE	Profilin-1 (Profilin I)	Pfn1	0.472055	-0.0226674	0.190479	0.0361819	0.379084	-0.0172119
				Q9JJV2	PROF2_MOUSE	Profilin-2 (Profilin II)	Pfn2	0.401188	0.0273724	0.0525719	-0.0524998	0.035918	-0.0696263
				Q9DBJ1	PGAM1_MOUSE	Phosphoglycerate mutase 1 (EC 5.4.2.11) (EC 5.4.2.4) (BPG-dependent PGAM 1) (Phosphoglycerate mutase isozyme B) (PGAM-B)	Pgam1	0.139061	0.0582395	0.023413	-0.0292726	0.0470979	0.0325618
				O70250	PGAM2_MOUSE	Phosphoglycerate mutase 2 (EC 5.4.2.11) (EC 5.4.2.4) (BPG-dependent PGAM 2) (Muscle-specific phosphoglycerate mutase) (Phosphoglycerate mutase isozyme M) (PGAM-M)	Pgam2	0.196235	0.0656645	0.776469	0.0447485	0.62352	0.032407
				Q8BX10	PGAM5_MOUSE	Serine/threonine-protein phosphatase PGAM5, mitochondrial (EC 3.1.3.16) (Phosphoglycerate mutase family member 5)	Pgam5	0.117499	-0.117513	0.865015	-0.0188262	0.684413	0.0577543
+			MC_FC	Q3UUQ7	PGAP1_MOUSE	GPI inositol-deacylase (EC 3.1.-.-) (Post-GPI attachment to proteins factor 1)	Pgap1	0.0103014	-0.267189	0.00327781	0.283896	0.306018	0.101286
				Q9DCD0	6PGD_MOUSE	6-phosphogluconate dehydrogenase, decarboxylating (EC 1.1.1.44)	Pgd	0.21182	0.0478482	0.525222	0.0196919	0.012147	-0.0446744
[truncated: 1,217 more rows]
