# Supplementary material for: Sex Differences in the Ventral Tegmental Area and Nucleus Accumbens Proteome at Baseline and Following Nicotine Exposure
Source: Front Mol Neurosci. 2021 Jul 14;14:657064. doi: 10.3389/fnmol.2021.657064 (PMC8317211; doi:10.3389/fnmol.2021.657064)
Supplement: Supplementary file 7 [file Table_7.XLSX]

## Sheet: 7A. VTA MC vs FC
Supplemental Table 7A. Commonly altered VTA proteins in MC vs. FC comparisons in sub-chronic (C3H/HeJ) and chronic nicotine and withdrawal (C57BL/6J) groups.
			VTA C3H/HeJ		VTA C57BL/6J
Gene name	Accession No.	Protein name	q-value	Log2(FC)	q-value	Log2(FC)	Matched Direction?
Acadvl	P50544	Very long-chain specific acyl-CoA dehydrogenase, mitochondrial	0.0190545	0.189478	0.00795539	0.273801	Yes
Cox7a2	Q61387	Cytochrome c oxidase subunit 7A2, mitochondrial	0.0281176	0.171946	0.0317522	0.299484	Yes
Gfap	P03995	Glial fibrillary acidic protein	0	0.330068	0	-0.619916	No
Hapln1	Q9QUP5	Hyaluronan and proteoglycan link protein 1	0.00864	0.273792	0.00193103	0.47337	Yes
Ldha	P06151	L-lactate dehydrogenase A chain	0	-0.313148	0.00550617	-0.312163	Yes
Mrps36	Q9CQX8	28S ribosomal protein S36, mitochondrial	0.0248525	0.177044	0.00958084	0.255201	Yes
Plp1	P60202	Myelin proteolipid protein	0.0289697	-0.163174	0.00311111	0.354842	No
Ppp1r1b	Q60829	Protein phosphatase 1 regulatory subunit 1B	0.0142353	0.241672	0.00661053	0.343375	Yes
Scg2	Q03517	Secretogranin-2	0.0101935	-0.245383	0.00807547	-0.255289	Yes
Scn2b	Q56A07	Sodium channel subunit beta-2	0.0153684	-0.222169	0.00696774	-0.290893	Yes
Sept2	P42208	Septin-2	0.0211915	-0.192691	0.00661611	0.281716	No
Serpina1a	P07758	Alpha-1-antitrypsin 1-1	0	0.760316	0.00648649	0.400028	Yes
Serpina3k	P07759	Serine protease inhibitor A3K	0	0.929624	0.00945566	0.247941	Yes
Snca	O55042	Alpha-synuclein	0.0446667	-0.148221	0.00789668	-0.23754	Yes
Stx1a	O35526	Syntaxin-1A	0.0072	-0.261567	0.00536986	-0.363346	Yes
Th	P24529	Tyrosine 3-monooxygenase	0	-0.343573	0.00224	-0.563439	Yes
Vamp1	Q62442	Vesicle-associated membrane protein 1	0.00514286	0.27776	0.00876768	0.235446	Yes
FC = fold change

## Sheet: 7B. NAc MC vs FC
Supplemental Table 7B. Commonly altered NAc proteins in MC vs. FC comparisons in sub-chronic (C3H/HeJ) and chronic nicotine and withdrawal (C57BL/6J) groups.
			NAc C3H/HeJ		NAc C57BL/6J
Gene name	Accession No.	Protein name	q-value	Log2(FC)	q-value	Log2(FC)	Matched Direction?
Krt76	Q3UV17	Keratin, type II cytoskeletal 2 oral {ECO:0000250|UniProtKB:Q01546}	0.0206667	-0.260687	0.0376667	-0.346966	Yes
FC = fold change

## Sheet: 7C. VTA FN vs FC
Supplemental Table 7C. Commonly altered VTA proteins in FN vs. FC comparisons in sub-chronic (C3H/HeJ) and chronic nicotine and withdrawal (C57BL/6J) groups.
			VTA sub-chronic		VTA chronic
Gene name	Accession No.	Protein name	q-value	Log2(FC)	q-value	Log2(FC)	Matched Direction?
Alb	P07724	Serum albumin	0.0056	0.315432	1.31443e-06	-0.614068	No
Apoa1	Q00623	Apolipoprotein A-I	0	0.442841	5.39075e-06	-0.691135	No
Ces1c	P23953	Carboxylesterase 1C	0.0121212	0.256032	0.0042681	-0.46529	No
Ddc	O88533	Aromatic-L-amino-acid decarboxylase	0.0302169	-0.164447	2.68848e-05	0.42638	No
Gfap	P03995	Glial fibrillary acidic protein	0	-0.683469	7.0356e-07	0.83237	No
Hapln1	Q9QUP5	Hyaluronan and proteoglycan link protein 1	0.011	0.278513	7.48386e-06	-0.509478	No
Hba	P01942	Hemoglobin subunit alpha	0	0.478688	1.78737e-06	-0.520013	No
Hbb-b1	P02088	Hemoglobin subunit beta-1	0	0.358971	2.68848e-05	-0.420125	No
Krt76	Q3UV17	Keratin, type II cytoskeletal 2 oral {ECO:0000250|UniProtKB:Q01546}	0	-1.12362	0.00147834	0.522885	No
Ppp1r1b	Q60829	Protein phosphatase 1 regulatory subunit 1B	0.0101538	0.293092	6.32622e-05	0.868207	Yes
Serpina3k	P07759	Serine protease inhibitor A3K	0.00861538	0.308208	8.87964e-05	-0.567776	No
Th	P24529	Tyrosine 3-monooxygenase	0.00466667	-0.28872	2.95948e-06	0.516305	No
Tph2	Q8CGV2	Tryptophan 5-hydroxylase 2	0.0111579	-0.267267	0.000126005	0.436949	No
FC = fold change

## Sheet: 7D. VTA MN vs MC
Supplemental Table 7D. Commonly altered VTA proteins in MN vs. MC comparisons in sub-chronic (C3H/HeJ) and chronic nicotine and withdrawal (C57BL/6J) groups.
			VTA sub-chronic		VTA chronic
Gene name	Accession No.	Protein name	q-value	Log2(FC)	q-value	Log2(FC)	Matched Direction?
Gfap	P03995	Glial fibrillary acidic protein	0	-0.516	3.02e-05	0.748683	No
Ppp1r1b	Q60829	Protein phosphatase 1 regulatory subunit 1B	0	1.047	8.82e-06	1.13228	Yes
FC = fold change
